# Supplementary material for: Identification and characterization of a novel chromosome-encoded aminoglycoside O-nucleotidyltransferase gene, ant(9)-Id, in Providencia sp. TYF-12 isolated from the marine fish intestine
Source: Front Microbiol. 2024 Dec 12;15:1475172. doi: 10.3389/fmicb.2024.1475172 (PMC11669914; doi:10.3389/fmicb.2024.1475172)
Supplement: Supplementary file 4 [file Table_1.xlsx]

## Sheet: MIC of 11 antimicrobials for 14
strain ID	tetracycline	ciprofloxacin	tilmicosin	quinocrtone	mequindox	doxycycline	tiamulin	streptomycin	polymyxin B	chloramphenicol	ceftazidime
TYF-1	128	≤0.25	>512	>512	128	>64	>512	2	>64	16	128
TYF-2	64	≤0.25	>512	>512	≤1	64	>512	≤1	16	≤1	8
TYF-3	64	0.5	>512	>512	128	64	>512	16	>64	16	≤1
TYF-4	128	≤0.25	>512	>512	128	>64	>512	16	>64	16	64
TYF-5	128	0.5	>512	>512	128	>64	>512	2	>64	16	4
TYF-6	128	≤0.25	>512	>512	128	>64	>512	16	>64	16	4
TYF-7	128	2	>512	>512	16	64	>512	16	>64	16	128
TYF-8	128	1	>512	>512	128	32	>512	2	8	4	4
TYF-9	128	0.5	>512	>512	128	8	>512	4	64	≤1	64
TYF-10	128	4	128	>512	512	>64	>512	64	>64	32	≤1
TYF-11	128	4	>512	>512	＞512	64	>512	8	64	128	8
TYF-12	16	16	>512	>512	>512	4	>512	16	64	128	64
TYF-13	32	4	>512	>512	＞512	2	>512	128	64	32	512
TYF-14	8	8	>512	>512	>512	4	>512	2	64	256	8
TYF-15	8	32	>512	>512	>512	8	>512	2	64	>512	2
TYF-16	32	2	>512	>512	64	2	>512	16	64	16	32
TYF-17	128	0.5	>512	>512	16	8	>512	2	4	≤1	32
TYF-18	8	4	>512	>512	512	2	2	16	8	16	32
TYF-19	32	4	>512	>512	＞512	4	>512	16	8	128	128
FYR-11	8	≤0.25	512	>512	512	1	>512	≤1	8	256	8
GLN-1	8	1	>512	>512	>512	4	>512	2	8	128	2
GLN-2	4	0.5	>512	>512	512	16	>512	32	16	8	32
GLN-3	4	<0.25	512	>512	128	1	>512	256	64	16	256
GLN-4	64	<0.25	>512	>512	128	16	512	16	32	64	16
GLN-5	>512	<0.25	256	>512	64	16	>512	4	32	<1	4
GLN-6	2	<0.25	256	>512	512	8	>512	16	8	256	16
GLN-7	2	<0.25	256	>512	512	8	512	9	16	64	9
GLN-8	4	<0.25	128	>512	128	8	256	4	16	64	4
GLN-9	16	1	>512	>512	>512	8	>512	2	4	64	2
zjy-1	>512	0.5	>512	>512	>512	8	>512	8	8	128	8
zjy-2	>512	1	512	>512	256	32	>512	4	64	8	4
zjy-3	>512	1	512	>512	512	16	>512	8	64	4	8
zjy-4	>512	<0.25	>512	>512	512	>64	>512	≤1	>64	8	≤1
zjy-5	>512	<0.25	512	>512	256	64	>512	8	>64	4	8
zjy-6	>512	0.5	512	>512	128	16	>512	8	16	8	8
zjy-7	8	1	>512	>512	>512	16	>512	≤1	2	64	≤1
zjy-8	8	<0.25	>512	>512	>512	16	>512	16	16	64	16
zjy-9	8	<0.25	>512	>512	>512	32	>512	4	16	128	4
zjy-10	8	<0.25	>512	>512	>512	8	>512	16	16	128	16
zjy-11	16	0.5	>512	>512	>512	8	>512	16	16	128	16
zjy-13	8	0.5	>512	>512	>512	4	>512	4	8	>512	4
zjy-14	8	0.5	>512	>512	>512	8	>512	4	16	>512	4
zjy-15	8	0.5	>512	>512	>512	4	>512	4	8	>512	4
FYR-1	32	≤0.25	512	>512	128	32	>512	≤1	32	8	≤1
FYR-2	8	≤0.25	512	≤1	>512	4	>512	≤1	32	64	≤1
FYR-4	64	0.5	512	>512	32	32	>512	4	32	8	≤1
FYR-5	8	0.5	512	>512	>512	64	>512	4	32	256	8
FYR-6	8	0.5	512	>512	>512	32	>512	4	64	128	≤1
FYR-7	8	0.5	512	>512	>512	8	>512	64	16	128	4
FYR-8	8	0.5	512	>512	>512	4	>512	≤1	64	128	≤1
FYR-9	64	0.5	512	>512	64	32	>512	16	32	2	≤1
FYR-10	8	0.5	512	>512	128	16	>512	4	32	2	≤1
zbq-1	128	0.5	＞512	＞512	＞512	8	＞512	256	32	64	16
zbq-2	128	0.5	512	＞512	512	0.5	＞512	256	32	≤1	8
xss-1	16	0.5	＞512	＞512	＞512	8	＞512	16	8	128	≤1
xss-2	8	≤0.25	＞512	＞512	＞512	8	＞512	16	8	128	2
xss-3	128	1	＞512	＞512	256	32	＞512	256	4	64	≤1
xss-4	8	0.5	＞512	＞512	＞512	8	＞512	32	8	128	4
WSY-1	4	0.25	>512	>512	128	1	>512	8	16	128	>512
WSY-2	4	0.25	>512	>512	256	1	>512	4	64	128	64
WSY-3	2	0.25	>512	>512	256	0.5	>512	>512	128	2	8
WSY-4	2	0.25	>512	>512	256	0.5	>512	>512	128	16	64
WSY-5	2	0.25	>512	>512	256	0.5	>512	>512	128	16	8
WSY-6	4	0.25	>512	>512	128	0.5	>512	512	128	16	8
WSY-7	2	0.25	>512	>512	64	0.5	>512	512	128	16	32
WSY-8	4	0.25	>512	>512	256	8	>512	512	128	16	128
WSY-9	4	0.25	>512	>512	256	1	>512	>512	128	16	64
WSY-10	2	0.25	>512	>512	256	0.5	>512	>512	128	16	8
WSY-11	2	0.25	>512	>512	256	0.5	>512	>512	128	16	8
WSY-12	2	0.25	>512	>512	256	0.5	>512	>512	128	16	8
WSY-13	4	0.25	>512	>512	256	0.5	>512	512	128	16	8
WSY-14	4	0.25	>512	>512	256	0.5	>512	512	128	16	128
WSY-15	64	0.25	512	>512	512	8	>512	>512	128	16	128
WSY-16	4	2	>512	>512	256	1	>512	>512	128	16	128
WSY-17	2	0.25	>512	>512	256	0.5	>512	>512	128	16	8
WSY-18	4	1	512	>512	512	32	>512	32	64	2	8
WSY-19	>128	2	>512	>512	512	16	>512	8	16	2	8
WSY-20	>128	0.5	>512	>512	>512	64	>512	128	8	128	8
WSY-21	1	1	512	>512	32	1	>512	8	16	128	8
WSY-22	4	0.25	>512	>512	256	1	>512	512	128	2	8
zbq-3	128	1	＞512	＞512	＞512	4	＞512	≤1	8	128	16
zbq-4	128	0.5	＞512	＞512	＞512	2	＞512	2	8	128	8
zbq-5	128	0.5	＞512	＞512	＞512	4	＞512	≤1	8	64	8
zbq-6	128	0.5	＞512	＞512	16	8	＞512	＞512	32	≤1	2
zbq-7	128	≤0.25	＞512	＞512	256	8	＞512	＞512	8	16	16
zbq-8	128	≤0.25	＞512	＞512	256	8	＞512	512	8	16	16
zbq-9	128	0.5	＞512	＞512	256	8	＞512	512	16	16	16
zbq-10	128	≤0.25	＞512	＞512	＞512	8	＞512	256	8	64	8
zbq-11	128	≤0.25	＞512	＞512	＞512	4	＞512	256	8	64	8
zbq-12	128	1	＞512	＞512	＞512	8	＞512	256	32	256	16
zbq-13	128	≤0.25	＞512	＞512	＞512	4	＞512	64	8	256	8
zbq-14	128	≤0.25	＞512	＞512	512	8	＞512	512	8	32	8
zbq-15	4	≤0.25	＞512	＞512	＞512	4	＞512	256	16	256	8
zbq-16	128	≤0.25	＞512	＞512	＞512	8	＞512	64	16	64	8
zbq-17	128	≤0.25	＞512	＞512	＞512	8	＞512	＞512	16	128	8
zbq-18	128	≤0.25	＞512	＞512	＞512	8	＞512	512	8	128	8
zbq-19	128	1	＞512	＞512	512	1	＞512	＞512	16	16	4
yb-1	8	≤0.25	＞512	＞512	＞512	2	＞512	16	8	128	4
yb-2	2	≤0.25	＞512	＞512	＞512	4	＞512	32	8	128	4
yb-3	2	0.5	＞512	＞512	＞512	4	＞512	16	8	128	4
yb-4	2	≤0.25	＞512	＞512	＞512	4	＞512	16	8	128	4
yb-5	32	0.5	＞512	＞512	＞512	8	＞512	32	16	128	8
yb-6	4	1	＞512	＞512	＞512	4	＞512	32	16	128	4
yb-7	>64	1	＞512	＞512	64	128	＞512	32	4	256	<=1
yb-8	>64	2	＞512	＞512	256	>128	＞512	16	8	256	<=1
yb-9	64	≤0.25	＞512	＞512	＞512	4	＞512	16	32	256	≤1
yb-10	>64	1	＞512	＞512	64	32	＞512	64	＞64	32	≤1
yb-11	>64	2	＞512	＞512	128	64	＞512	64	＞64	256	≤1
yb-12	>64	0.5	＞512	＞512	32	128	＞512	64	＞64	128	16
yb-13	8	0.5	＞512	＞512	＞512	4	＞512	16	8	128	4
yb-14	4	4	＞512	＞512	＞512	8	＞512	64	32	128	16
CJQ-1	8	≤0.25	＞512	＞512	＞512	2	＞512	2	8	＞512	≤1
CJQ-2	4	0.5	＞512	＞512	＞512	2	＞512	2	8	128	4
CJQ-3	4	0.5	＞512	＞512	＞512	4	＞512	2	8	256	4
CJQ-4	8	≤0.25	＞512	＞512	＞512	4	＞512	2	8	128	4
CJQ-5	8	≤0.25	＞512	＞512	＞512	8	＞512	≤1	8	64	≤1
CJQ-6	4	≤0.25	＞512	＞512	256	1	＞512	≤1	16	2	＞512
CJQ-7	8	≤0.25	＞512	＞512	＞512	4	＞512	2	16	256	4
CJQ-8	8	0.5	＞512	＞512	＞512	4	＞512	2	8	128	8
CJQ-9	8	0.5	＞512	＞512	＞512	4	＞512	2	16	256	4
CJQ-10	8	≤0.25	＞512	＞512	256	1	＞512	＞512	16	8	128
CJQ-11	8	0.5	＞512	＞512	＞512	2	512	≤1	16	64	2
CJQ-12	4	≤0.25	＞512	＞512	256	4	＞512	≤1	4	2	256
CJQ-13	128	0.5	＞512	＞512	＞512	4	＞512	8	＞64	32	4
CJQ-14	128	0.5	＞512	＞512	＞512	32	＞512	≤1	＞64	32	≤1
YQ-1	128	≤0.25	256	256	>512	>128	512	16	＞64	16	4
YQ-2	>64	≤0.25	＞512	>512	>512	>128	512	8	＞64	16	8
YQ-3	8	≤0.25	＞512	>512	>512	1	>512	8	16	256	16
YQ-4	8	1	＞512	>512	>512	0.5	>512	8	16	128	16
YQ-5	8	0.5	＞512	>512	>512	1	>512	8	32	256	1
YQ-6	8	0.5	＞512	>512	>512	2	>512	8	16	128	16
YQ-7	8	1	＞512	>512	>512	2	>512	8	64	64	4
YQ-8	8	16	256	>512	>512	16	512	8	64	8	1
YQ-9	16	0.5	256	>512	>512	4	512	16	＞64	32	1
YQ-10	>64	≤0.25	256	>512	>512	16	512	16	＞64	1	2
YQ-11	16	≤0.25	256	256	>512	0.5	512	16	64	1	2
YQ-12	>64	0.5	＞512	>512	>512	>128	512	16	64	8	16
YQ-13	32	0.5	＞512	>512	>512	2	>512	16	32	256	8
YQ-14	8	4	＞512	>512	>512	4	>512	8	＞64	32	256
YQ-15	32	1	＞512	>512	>512	64	>512	8	＞64	32	2
ACTT25922	1	≤0.25	16	＞512	8	1	＞512	8	4	4	≤1
ATCC29212	8	0.5	8	＞512	64	4	64	128	＞64	4	128
ATCC27853	1	≤0.25	>512	＞512	512	1	256	16	4	4	≤1

## Sheet: marine-ani.tsv
query	subject	ANI
142	Stenotrophomonas_sp._1663558_GCF_001974685.1-1663558	99.3649
156	[Pseudomonas]_hibiscicola_86189_GCF_000382065.1-86189	97.2203
CJQ_1	Pseudomonas_sp._2662033_GCF_013305665.1-2662033	99.2336
CJQ_2	Pseudomonas_sp._2662033_GCF_013305665.1-2662033	99.2342
CJQ_3	Pseudomonas_sp._2662033_GCF_013305665.1-2662033	99.2566
CJQ_4	Pseudomonas_sp._2662033_GCF_013305665.1-2662033	99.2558
CJQ_5	Citrobacter_sp._2697370_GCF_009905315.1-2697370	98.9589
CJQ_6	Vibrio_sp._2816076_GCF_017313465.1-2816076	98.2885
CJQ_7	Pseudomonas_sp._1981715_GCF_002113565.1-1981715	89.9402
CJQ_8	Pseudomonas_sp._1981747_GCF_002113785.1-1981747	90.05
CJQ_9	Pseudomonas_sp._2662033_GCF_013305665.1-2662033	99.222
CJQ_10	Photobacterium_damselae_38293_GCF_000176795.1-38293	98.0299
CJQ_11	Pseudomonas_sp._1261627_GCF_004382115.1-1261627	99.4602
CJQ_12	Aeromonas_bivalvium_440079_GCF_000819765.1-440079	98.3092
CJQ_13	Pseudomonas_sp._1981715_GCF_002113565.1-1981715	89.8754
CJQ_14	Serratia_sp._1931998_GCF_002752455.1-1931998	99.1021
FYR_1	Aeromonas_media_651_GCF_000287215.2-651	97.1433
FYR_2	Pseudomonas_sp._1661048_GCF_001320605.1-1661048	99.4267
FYR_4	Vibrio_sp._1620393_GCF_000960545.1-1620393	98.3651
FYR_5	Pseudomonas_sp._1981711_GCF_002113575.1-1981711	89.9974
FYR_6	Enterobacter_cloacae_complex_sp._2779570_GCF_014895835.1-2779570	99.7642
FYR_7	Pseudomonas_sp._1947339_GCA_002479855.1-1947339	93.9519
FYR_8	Pseudomonas_sp._1661048_GCF_001320605.1-1661048	99.41
FYR_9	Raoultella_sp._2799495_GCF_016599735.1-2799495	99.5448
FYR_10	Vibrio_sp._1904359_GCF_002002385.1-1904359	98.3808
FYR_11	Pseudomonas_sp._2662033_GCF_013305665.1-2662033	99.2099
GLN_1	Vibrio_sp._1904360_GCF_002002405.1-1904360	98.364
GLN_2	Pseudomonas_sp._1981747_GCF_002113785.1-1981747	90.0144
GLN_3	Pseudomonas_sp._1981747_GCF_002113785.1-1981747	90.1888
GLN_4	Photobacterium_damselae_38293_GCF_000176795.1-38293	97.941
GLN_5	Vibrio_sp._1904359_GCF_002002385.1-1904359	98.3868
GLN_6	Pseudomonas_sp._2653164_GCF_902506475.1-2653164	89.4961
GLN_7	Pseudomonas_fluvialis_1793966_GCF_002234375.1-1793966	98.5394
GLN_8	Acinetobacter_soli_487316_GCF_000368705.1-487316	98.653
GLN_9	Leclercia_sp._1920117_GCF_002920265.1-1920117	98.6444
TYF_1	Morganella_sp._1581087_GCF_001807955.1-1581087	94.1424
TYF_2	Vibrio_plantisponsor_664643_GCF_013041605.1-664643	98.3374
TYF_3	Proteus_terrae_1574161_GCF_003144325.1-1574161	99.4184
TYF_4	Morganella_sp._1581087_GCF_001807955.1-1581087	94.142
TYF_5	Proteus_sp._2050965_GCF_003144435.1-2050965	95.4571
TYF_6	Morganella_sp._1581087_GCF_001807955.1-1581087	94.1548
TYF_7	Acinetobacter_ursingii_108980_GCF_000248135.1-108980	97.2808
TYF_8	Raoultella_sp._2769256_GCF_014852555.1-2769256	99.5473
TYF_9	Vibrio_sp._1904359_GCF_002002385.1-1904359	98.3789
TYF_10	Providencia_sp._2603244_GCF_011045615.1-2603244	84.1376
TYF_11	Pseudomonas_sp._1981747_GCF_002113785.1-1981747	89.8198
TYF_12	Providencia_sp._2603245_GCF_011045635.1-2603245	84.1745
TYF_13	Stenotrophomonas_geniculata_86188_GCF_003970095.1-86188	98.2469
TYF_14	Pseudomonas_sp._1981734_GCF_002113085.1-1981734	90.0879
TYF_15	Pseudomonas_sp._1981747_GCF_002113785.1-1981747	89.8876
TYF_16	Vibrio_sp._2766781_GCF_016920955.1-2766781	98.4676
TYF_17	Aeromonas_media_651_GCF_000287215.2-651	93.8698
TYF_18	Bacillus_thuringiensis_1428_GCF_000092165.1-1428	99.1143
TYF_19	Acinetobacter_sp._2749440_GCF_013391585.1-2749440	96.5462
WSY_1	Acinetobacter_sp._1310773_GCF_000588395.1-1310773	99.8591
WSY_2	Acinetobacter_proteolyticus_1776741_GCF_001753605.1-1776741	89.2056
WSY_3	Delftia_sp._1895749_GCA_001898745.1-1895749	98.4346
WSY_4	Delftia_sp._1895749_GCA_001898745.1-1895749	98.4362
WSY_5	Delftia_sp._1812483_GCF_018320755.1-1812483	98.4468
WSY_6	Delftia_sp._1895749_GCA_001898745.1-1895749	98.4426
WSY_7	Delftia_sp._1812483_GCF_018320755.1-1812483	98.4522
WSY_8	Delftia_tsuruhatensis_180282_GCF_000710165.1-180282	98.5325
WSY_9	Delftia_sp._1812483_GCF_018320755.1-1812483	98.6236
WSY_10	Delftia_sp._1895749_GCA_001898745.1-1895749	98.437
WSY_11	Delftia_sp._1812483_GCF_018320755.1-1812483	98.4101
WSY_12	Delftia_sp._1812483_GCF_018320755.1-1812483	98.415
WSY_13	Delftia_sp._1895749_GCA_001898745.1-1895749	98.4382
WSY_14	Delftia_sp._1812483_GCF_018320755.1-1812483	98.4066
WSY_15	Myroides_odoratimimus_76832_GCF_000242075.2-76832	98.4431
WSY_16	Delftia_sp._1812483_GCF_018320755.1-1812483	98.6134
WSY_17	Delftia_sp._1812483_GCF_018320755.1-1812483	98.4048
WSY_18	Kluyvera intermedia_GCF_009649915.1	95.403
WSY_19	Klebsiella_sp._2600607_GCF_007910085.1-2600607	98.75
WSY_20	Pseudomonas_sp._1261632_GCF_003253635.1-1261632	93.9595
WSY_21	Vibrio_mimicus_674_GCF_000175975.1-674	89.7644
WSY_22	Delftia_sp._1812483_GCF_018320755.1-1812483	98.6886
xss_1	Pseudomonas_sp._1947319_GCA_002425525.1-1947319	99.401
xss_2	Pseudomonas_sp._1478142_GCF_001259595.1-1478142	86.0331
xss_3	Leclercia_adecarboxylata_83655_GCF_000735515.1-83655	98.6997
xss_4	Pseudomonas_sp._1947339_GCA_002479855.1-1947339	94.0084
yb_1	Pseudomonas_sp._1981746_GCF_002113245.1-1981746	89.8654
yb_2	Pseudomonas_sp._1981747_GCF_002113785.1-1981747	90.0723
yb_3	Pseudomonas juntendi_GCA_021560075.1	96.7987
yb_4	Pseudomonas_sp._2662033_GCF_013305665.1-2662033	99.2504
yb_5	Pseudomonas_sp._1981711_GCF_002113575.1-1981711	90.0186
yb_6	Pseudomonas putida_GCA_000412675.1	89.9353
yb_7	Kluyvera intermedia_GCF_009649915.1	98.8303
yb_8	Enterobacter_sp._2742673_GCF_013615235.1-2742673	99.3225
yb_9	Pseudomonas_sp._1661048_GCF_001320605.1-1661048	99.1158
yb_10	Proteus terrae subsp. cibarius_GCF_011045835.1	96.414
yb_11	Morganella morganii subsp. morganii_GCF_006094455.1	94.1743
yb_12	Shewanella algae_GCA_009183365.2	98.1926
yb_13	Pseudomonas_sp._2662033_GCF_013305665.1-2662033	99.2631
yb_14	Shewanella_sp._1826753_GCF_012030025.1-1826753	98.246
YQ_1	Morganella_sp._1581087_GCF_001807955.1-1581087	94.1349
YQ_2	Morganella_sp._1581087_GCF_001807955.1-1581087	94.1412
YQ_3	Pseudomonas_sp._2662033_GCF_013305665.1-2662033	99.2529
YQ_4	Pseudomonas sp. NY5710_GCA_013305665.1	99.1724
YQ_5	Pseudomonas_sp._1981715_GCF_002113565.1-1981715	89.9991
YQ_6	Pseudomonas_sp._1981747_GCF_002113785.1-1981747	90.0154
YQ_7	Pseudomonas putida_GCA_000412675.1	89.8663
YQ_8	Shewanella mangrovisoli_GCA_019457635.1	96.5728
YQ_9	Shewanella_sp._1826753_GCF_012030025.1-1826753	98.2387
YQ_10	Vibrio_sp._1620393_GCF_000960545.1-1620393	98.3778
YQ_11	Vibrio_sp._1620393_GCF_000960545.1-1620393	98.3281
YQ_12	Morganella_sp._1581087_GCF_001807955.1-1581087	94.1387
YQ_13	Pseudomonas_sp._1981715_GCF_002113565.1-1981715	89.9609
YQ_14	Acinetobacter_sp._1071390_GCF_000241225.1-1071390	97.3515
YQ_15	Serratia_liquefaciens_614_GCF_000422085.1-614	98.8525
zbq_1	Vibrio_sp._1904359_GCF_002002385.1-1904359	98.3862
zbq_2	Vibrio_sp._1620394_GCF_000960425.1-1620394	98.3978
zbq_3	Pseudomonas_sp._1981747_GCF_002113785.1-1981747	90.1162
zbq_4	Pseudomonas_sp._1661037_GCF_001753915.1-1661037	99.5892
zbq_5	Pseudomonas_sp._1981747_GCF_002113785.1-1981747	90.1397
zbq_6	Vibrio_sp._1904359_GCF_002002385.1-1904359	98.3786
zbq_7	Enterobacter_cloacae_complex_sp._2779604_GCF_014982425.1-2779604	99.9057
zbq_8	Enterobacter_cloacae_complex_sp._2779604_GCF_014982425.1-2779604	99.906
zbq_9	Enterobacter_cloacae_complex_sp._2779604_GCF_014982425.1-2779604	99.8938
zbq_10	Pseudomonas_sp._1981711_GCF_002113575.1-1981711	90.0769
zbq_11	Pseudomonas_sp._1981711_GCF_002113575.1-1981711	90.0742
zbq_12	Pseudomonas_sp._1981711_GCF_002113575.1-1981711	90.105
zbq_13	Pseudomonas_sp._2662033_GCF_013305665.1-2662033	99.2458
zbq_14	Vibrio_sp._1904359_GCF_002002385.1-1904359	98.2807
zbq_15	Delftia_sp._1812483_GCF_018320755.1-1812483	98.3472
zbq_16	Pseudomonas_sp._1947334_GCA_002454255.1-1947334	82.1004
zbq_17	Pseudomonas_sp._2662033_GCF_013305665.1-2662033	99.2361
zbq_18	Pseudomonas_sp._2717475_GCF_012985845.1-2717475	86.7298
zbq_19	Vibrio_sp._2766781_GCF_016920955.1-2766781	98.4538
zjy_1	Raoultella_sp._2799495_GCF_016599735.1-2799495	99.5506
zjy_2	Citrobacter_sp._2697370_GCF_009905315.1-2697370	99.0269
zjy_3	Raoultella_sp._2799495_GCF_016599735.1-2799495	99.5076
zjy_4	Morganella_morganii_582_GCF_000286435.2-582	93.9504
zjy_5	Raoultella_sp._2799495_GCF_016599735.1-2799495	99.5691
zjy_6	Shewanella_sp._1460651_GCF_001310535.1-1460651	98.5196
zjy_7	Pseudomonas_sp._2662033_GCF_013305665.1-2662033	99.2135
zjy_8	Pseudomonas_sp._2562590_GCF_013357275.1-2562590	98.3909
zjy_9	Pseudomonas_sp._2587863_GCF_009363395.1-2587863	98.3232
zjy_10	Pseudomonas_sp._1981747_GCF_002113785.1-1981747	90.1157
zjy_11	Pseudomonas_sp._1981715_GCF_002113565.1-1981715	90.0198
zjy_13	Pseudomonas_sp._1981711_GCF_002113575.1-1981711	90.0575
zjy_14	Pseudomonas_sp._1981715_GCF_002113565.1-1981715	89.9114
zjy_15	Pseudomonas_sp._1981711_GCF_002113575.1-1981711	89.9757
