# Supplementary material for: Identification and characterization of a novel chromosome-encoded aminoglycoside O-nucleotidyltransferase gene, ant(9)-Id, in Providencia sp. TYF-12 isolated from the marine fish intestine
Source: Front Microbiol. 2024 Dec 12;15:1475172. doi: 10.3389/fmicb.2024.1475172 (PMC11669914; doi:10.3389/fmicb.2024.1475172)
Supplement: Supplementary file 5 [file Table_2.xlsx]

## Sheet: CJQ-1-14
qSeq ID	qLength	qStart	qEnd	qCoverage (%)	qSimilarity (%)	sAccession	sLength	sStart	sEnd	sCoverage (%)	sSimilarity (%)	sTitle	bit socre	e-value	identity (%)	alignment length	mismatch	ARO name	Description	AMR Gene Family	Drug Class	Resistance Mechanism
CJQ_1_00009	583	4	557	95.03	37.33	AAC22787.1	610	35	583	90	35.36	AAC22787.1 ARO:3004446 Haemophilus influenzae PBP3 conferring resistance to beta-lactam antibiotics [Haemophilus influenzae Rd KW20]	374	2.6e-123	39.286	560	323	Haemophilus influenzae PBP3 conferring resistance to beta-lactam antibiotics	PBP3 is a penicillin-binding protein and beta-lactam resistance enzyme encoded by the ftsI gene in Haemophilus influenzae. Mutations in ftsI confer resistance to beta-lactam antibiotics.	Penicillin-binding protein mutations conferring resistance to beta-lactam antibiotics	carbapenem;cephalosporin;cephamycin;monobactam;penam	antibiotic target alteration
CJQ_1_00015	359	8	329	89.69	24.73	AAK80188.1	359	6	330	90.53	24.96	AAK80188.1 ARO:3004561 Clostridioides difficile murG with mutation conferring resistance to vancomycin [Clostridium acetobutylicum ATCC 824]	147	0	27.576	330	226	Clostridioides difficile murG with mutation conferring resistance to vancomycin	Mutations in murG which confer resistance to vancomycin in Clostridioides difficile	murG transferase	glycopeptide antibiotic	antibiotic target alteration
CJQ_1_00017	318	19	312	92.45	29.55	AEP40500.1	343	3	341	98.83	31.59	AEP40500.1 ARO:3002912 vanN [Enterococcus faecium]	167	2.4e-50	31.965	341	183	vanN	VanN is a D-Ala-D-Ala ligase homolog that can synthesize D-Ala-D-Ser, an alternative substrate for peptidoglycan synthesis that reduces vancomycin binding affinity in Enterococcus faecium	glycopeptide resistance gene cluster;van ligase	glycopeptide antibiotic	antibiotic target alteration
CJQ_1_00021	303	1	297	98.02	59.08	AJF83452.1	300	1	297	99	59.67	AJF83452.1 ARO:3003574 LpxC [Acinetobacter baumannii]	383	0	60.269	297	118	LpxC	The LpxC gene is widely known to be involved in the biosynthesis of lipid A in Gram-negative bacteria and mutations to this gene may cause resistance to antimicrobial peptides that target the outer membrane	Acinetobacter mutant Lpx gene conferring resistance to colistin	peptide antibiotic	antibiotic target alteration
CJQ_1_00027	676	430	662	34.47	8.55	CAG39047	608	361	597	38.98	9.67	CAG39047 ARO:3003794 Staphylococcus aureus walK with mutation conferring daptomycin resistance [Staphylococcus aureus subsp. aureus MRSA252]	64.3	1.66e-11	24.809	262	143	Staphylococcus aureus walK with mutation conferring resistance to daptomycin	walK is the histidine kinase sensor of a two-component regulatory system controlling peptidoglycan metabolism through regulation of the expression of most of the peptidoglycan hydrolase genes. Mutations in the gene have been found that confer daptomycin resistance.	daptomycin resistant walK	peptide antibiotic	antibiotic target alteration
CJQ_1_00031	414	11	368	86.47	38.72	AFH35853.1	410	14	364	85.61	38.34	AFH35853.1 ARO:3001328 Escherichia coli mdfA [Escherichia coli]	277	1.12e-90	44.78	364	182	Escherichia coli mdfA	Multidrug efflux pump in E. coli. This multidrug efflux system was originally identified as the Cmr/CmlA chloramphenicol exporter.	major facilitator superfamily (MFS) antibiotic efflux pump	benzalkonium chloride;rhodamine;tetracycline antibiotic	antibiotic efflux
CJQ_1_00041	227	1	220	96.92	48.02	AAG06465.1	223	3	220	97.76	48.43	AAG06465.1 ARO:3005063 cprR [Pseudomonas aeruginosa PAO1]	209	0	49.545	220	109	cprR	cprR is one part of a two-component regulatory system. It with its counterpart cprS induce the Arn operon to confer resistance to peptide antibiotics.	pmr phosphoethanolamine transferase	peptide antibiotic	antibiotic efflux;antibiotic target alteration
CJQ_1_00042	436	117	420	69.72	15.18	ABD30512.1	451	139	449	68.96	15.01	ABD30512.1 ARO:3000839 arlS [Staphylococcus aureus subsp. aureus NCTC 8325]	89.7	0	21.767	317	229	arlS	ArlS is a protein histidine kinase that phosphorylates ArlR, a promoter for norA expression.	major facilitator superfamily (MFS) antibiotic efflux pump	acridine dye;disinfecting agents and intercalating dyes;fluoroquinolone antibiotic	antibiotic efflux
CJQ_1_00046	1014	1	1004	99.01	80.18	AAG07763.1	1018	1	1004	98.62	79.86	AAG07763.1 ARO:3003031 mexW [Pseudomonas aeruginosa PAO1]	1620	0	80.976	1004	191	MexW	MexW is the RND-type membrane protein of the efflux complex MexVW-OprM.	resistance-nodulation-cell division (RND) antibiotic efflux pump	acridine dye;disinfecting agents and intercalating dyes;fluoroquinolone antibiotic;macrolide antibiotic;phenicol antibiotic;tetracycline antibiotic	antibiotic efflux
CJQ_1_00047	382	1	366	95.81	57.85	AAG07762.1	376	1	366	97.34	58.78	AAG07762.1 ARO:3003030 mexV [Pseudomonas aeruginosa PAO1]	436	0	60.383	366	145	MexV	MexV is the membrane fusion protein of the MexVW-OprM multidrug efflux complex.	resistance-nodulation-cell division (RND) antibiotic efflux pump	acridine dye;disinfecting agents and intercalating dyes;fluoroquinolone antibiotic;macrolide antibiotic;phenicol antibiotic;tetracycline antibiotic	antibiotic efflux
CJQ_1_00050	304	1	296	97.37	28.1	CAA79966.1	295	1	292	98.98	28.57	CAA79966.1 ARO:3003665 NmcR [Enterobacter cloacae]	128	0	28.859	298	204	NmcR	NmcR is a homolog of the LysR regulator found in Enterobacter cloacae that contribute to the regulation of NmcA beta-lactamase	NmcA beta-lactamase	carbapenem;cephalosporin;cephamycin;penam	antibiotic inactivation
CJQ_1_00065	377	141	374	62.07	16.29	ADZ12700.1	253	18	253	93.28	24.49	ADZ12700.1 ARO:3005090 RanB [Riemerella anatipestifer RA-GD]	90.5	0	26.25	240	167	RanB	RanB is the determinant of antibiotic resistance within the RanARanB ABC-type efflux system. It confers resistance to aminoglycoside antibiotics.	ATP-binding cassette (ABC) antibiotic efflux pump	aminoglycoside antibiotic	antibiotic efflux
CJQ_1_00066	263	7	246	91.25	32.7	VWQ04088.1	269	8	246	88.85	31.84	VWQ04088.1 ARO:3005041 mlaF [Escherichia coli]	138	0	35.833	240	153	mlaF	mlaF from the mla system is a gene proposed to play a part in the transport of phospholipids to the outer membrane. Insertions in mlaF are shown to confer resistance to linezolid.	ATP-binding cassette (ABC) antibiotic efflux pump	oxazolidinone antibiotic	antibiotic efflux
CJQ_1_00076	448	162	448	64.06	26.56	AAK37618.1	318	38	316	87.74	36.38	AAK37618.1 ARO:3005008 Txr [Vibrio harveyi]	224	5.66e-71	41.463	287	160	TxR	TxR is a putative transcription regulator that plays a role in conferring tetracycline resistance. It is required for proper functioning of Tet35.	ATP-binding cassette (ABC) antibiotic efflux pump	tetracycline antibiotic	antibiotic efflux
CJQ_1_00077	593	178	593	70.15	20.25	CAG39047	608	193	598	66.78	19.28	CAG39047 ARO:3003794 Staphylococcus aureus walK with mutation conferring daptomycin resistance [Staphylococcus aureus subsp. aureus MRSA252]	180	0	28.873	426	273	Staphylococcus aureus walK with mutation conferring resistance to daptomycin	walK is the histidine kinase sensor of a two-component regulatory system controlling peptidoglycan metabolism through regulation of the expression of most of the peptidoglycan hydrolase genes. Mutations in the gene have been found that confer daptomycin resistance.	daptomycin resistant walK	peptide antibiotic	antibiotic target alteration
CJQ_1_00078	535	285	523	44.67	13.05	AAM15533.1	399	151	390	60.15	17.57	AAM15533.1 ARO:3003688 PvrR [Pseudomonas aeruginosa]	97.4	1.17e-22	29.218	243	165	PvrR	PvrR is a response regulator that controls the conversion between antibiotic-resistant and antibiotic-susceptible forms of Pseudomonas aeruginosa biofilms through porin deletion/gene absence	phenotypic variant regulator	aminoglycoside antibiotic	resistance by absence
CJQ_1_00090	257	2	228	88.33	23.63	AGN74946	541	311	531	40.85	10.93	AGN74946 ARO:3003749 salA [Staphylococcus sciuri subsp. sciuri]	94.7	0	26.754	228	159	salA	salA is an ABC-F subfamily protein gene isolated from the chromosome of Staphylococcus sciuri conferring resistance to lincosamides and streptogramins.	ABC-F ATP-binding cassette ribosomal protection protein	lincosamide antibiotic;macrolide antibiotic;oxazolidinone antibiotic;phenicol antibiotic;pleuromutilin antibiotic;streptogramin antibiotic;tetracycline antibiotic	antibiotic target protection
CJQ_1_00090	257	5	196	74.71	15.59	AGN74946	541	2	201	36.97	7.72	AGN74946 ARO:3003749 salA [Staphylococcus sciuri subsp. sciuri]	52.8	8.96e-09	20.874	206	143	salA	salA is an ABC-F subfamily protein gene isolated from the chromosome of Staphylococcus sciuri conferring resistance to lincosamides and streptogramins.	ABC-F ATP-binding cassette ribosomal protection protein	lincosamide antibiotic;macrolide antibiotic;oxazolidinone antibiotic;phenicol antibiotic;pleuromutilin antibiotic;streptogramin antibiotic;tetracycline antibiotic	antibiotic target protection
CJQ_1_00094	335	1	218	65.07	21.79	ADZ12699.1	258	1	214	82.95	27.78	ADZ12699.1 ARO:3005091 RanA [Riemerella anatipestifer RA-GD]	151	0	33.486	218	141	RanA	RanA is a part of the RanARanB ABC-type efflux system. Alongside RanB, it confers resistance to aminoglycoside antibiotics.	ATP-binding cassette (ABC) antibiotic efflux pump	aminoglycoside antibiotic	antibiotic efflux
CJQ_1_00125	298	7	285	93.62	23.66	CAA79966.1	295	6	277	92.2	23.3	CAA79966.1 ARO:3003665 NmcR [Enterobacter cloacae]	101	4.68e-26	25.267	281	199	NmcR	NmcR is a homolog of the LysR regulator found in Enterobacter cloacae that contribute to the regulation of NmcA beta-lactamase	NmcA beta-lactamase	carbapenem;cephalosporin;cephamycin;penam	antibiotic inactivation
CJQ_1_00129	299	6	299	98.33	30.36	CAA79966.1	295	3	291	97.97	30.24	CAA79966.1 ARO:3003665 NmcR [Enterobacter cloacae]	124	1.88e-34	30.872	298	193	NmcR	NmcR is a homolog of the LysR regulator found in Enterobacter cloacae that contribute to the regulation of NmcA beta-lactamase	NmcA beta-lactamase	carbapenem;cephalosporin;cephamycin;penam	antibiotic inactivation
CJQ_1_00135	325	1	274	84.31	30	ADT64081.1	339	1	278	82.01	29.18	ADT64081.1 ARO:3000813 MexS [Pseudomonas aeruginosa PAK]	119	0	35.587	281	171	MexS	MexS is a suppressor of MexT, which is an activator of the multidrug pump MexEF-OprN. Mutations in MexS lead to multidrug resistance.	resistance-nodulation-cell division (RND) antibiotic efflux pump	diaminopyrimidine antibiotic;fluoroquinolone antibiotic;phenicol antibiotic	antibiotic efflux
CJQ_1_00141	310	3	278	89.03	29.36	AAG06942.1	662	6	278	41.24	13.6	AAG06942.1 ARO:3002985 arnA [Pseudomonas aeruginosa PAO1]	131	0	32.975	279	178	arnA	arnA modifies lipid A with 4-amino-4-deoxy-L-arabinose (Ara4N) which allows gram-negative bacteria to resist the antimicrobial activity of cationic antimicrobial peptides and antibiotics such as polymyxin. arnA is found in E. coli and P. aeruginosa.	pmr phosphoethanolamine transferase	peptide antibiotic	antibiotic target alteration
CJQ_1_00151	539	21	324	56.4	20.03	ABO11759.2	429	6	312	71.56	25.41	ABO11759.2 ARO:3004573 Acinetobacter baumannii AbaF [Acinetobacter baumannii ATCC 17978]	177	0	35.505	307	195	Acinetobacter baumannii AbaF	Expression of abaF in E. coli resulted in increased resistance to fosfomycin.	major facilitator superfamily (MFS) antibiotic efflux pump	fosfomycin	antibiotic efflux
CJQ_1_00151	539	438	532	17.63	6.43	ABO11759.2	429	328	421	21.91	7.99	ABO11759.2 ARO:3004573 Acinetobacter baumannii AbaF [Acinetobacter baumannii ATCC 17978]	53.1	2.45e-08	36.458	96	58	Acinetobacter baumannii AbaF	Expression of abaF in E. coli resulted in increased resistance to fosfomycin.	major facilitator superfamily (MFS) antibiotic efflux pump	fosfomycin	antibiotic efflux
CJQ_1_00153	295	7	198	65.08	15.02	ALH22601.1	337	1	208	61.72	14.24	ALH22601.1 ARO:3000620 adeL [Acinetobacter baumannii]	55.1	1.81e-09	23.077	208	144	adeL	AdeL is a regulator of AdeFGH in Acinetobacter baumannii. AdeL mutations are associated with AdeFGH overexpression and multidrug resistance.	resistance-nodulation-cell division (RND) antibiotic efflux pump	fluoroquinolone antibiotic;tetracycline antibiotic	antibiotic efflux
CJQ_1_00156	294	52	177	42.86	12.38	WP_122630829.1	302	93	225	44.04	12.72	WP_122630829.1 ARO:3006872 DHT2-1 [uncultured bacterium]	53.1	5.75e-09	28.889	135	85	DHT2-1	DHT2-1 is a DHT2 beta-lactamase.	DHT2 beta-lactamase	carbapenem	antibiotic inactivation
CJQ_1_00157	430	135	429	68.6	26.74	AAK37618.1	318	23	316	92.45	36.04	AAK37618.1 ARO:3005008 Txr [Vibrio harveyi]	213	0	38.983	295	179	TxR	TxR is a putative transcription regulator that plays a role in conferring tetracycline resistance. It is required for proper functioning of Tet35.	ATP-binding cassette (ABC) antibiotic efflux pump	tetracycline antibiotic	antibiotic efflux
CJQ_1_00169	137	9	131	89.78	28.98	AAG07592.1	148	10	132	83.11	26.83	AAG07592.1 ARO:3000806 mexG [Pseudomonas aeruginosa PAO1]	47.8	1.58e-08	32.283	127	78	MexG	MexG is a membrane protein required for MexGHI-OpmD efflux activity.	resistance-nodulation-cell division (RND) antibiotic efflux pump	acridine dye;disinfecting agents and intercalating dyes;fluoroquinolone antibiotic;tetracycline antibiotic	antibiotic efflux
CJQ_1_00171	386	306	377	18.65	6.14	BAB38260.1	457	380	455	16.63	5.47	BAB38260.1 ARO:3000830 cpxA [Escherichia coli O157:H7 str. Sakai]	48.1	7.2e-07	32.895	76	47	cpxA	CpxA is a membrane-localized sensor kinase that is activated by envelope stress. It starts a kinase cascade that activates CpxR, which promotes efflux complex expression.	resistance-nodulation-cell division (RND) antibiotic efflux pump	aminocoumarin antibiotic;aminoglycoside antibiotic	antibiotic efflux
CJQ_1_00173	117	3	116	97.44	35.21	ACL82957.1	232	5	119	49.57	17.91	ACL82957.1 ARO:3002928 vanRM [Enterococcus faecium]	67	1e-15	36.134	119	67	vanRM	vanRM is a vanR variant found in the vanM gene cluster	glycopeptide resistance gene cluster;vanR	glycopeptide antibiotic	antibiotic target alteration
CJQ_1_00174	65	1	52	80	55.38	AAC16242.1	61	1	52	85.25	59.02	AAC16242.1 ARO:3005069 rsmA [Pseudomonas aeruginosa]	81.3	0	69.231	52	16	rsmA	rsmA is a gene that regulates virulence of Pseudomonas aeruginosa. However, its negative effect on MexEF-OprN overexpression has been noted to confer resistance to various antibiotics. It's Escherichia coli homolog is csrA.	resistance-nodulation-cell division (RND) antibiotic efflux pump	diaminopyrimidine antibiotic;fluoroquinolone antibiotic;phenicol antibiotic	antibiotic efflux
CJQ_1_00176	363	29	305	76.31	20.3	AAA99504.1	306	32	299	87.58	23.29	AAA99504.1 ARO:3002987 bcrA [Bacillus licheniformis]	100	0	26.596	282	188	bcrA	bcrA is an ABC transporter found in Bacillus licheniformis that confers bacitracin resistance	ATP-binding cassette (ABC) antibiotic efflux pump	peptide antibiotic	antibiotic efflux
CJQ_1_00213	417	73	377	73.14	17.41	CAJ77855.1	483	133	454	66.67	15.87	CAJ77855.1 ARO:3000779 adeH [Acinetobacter baumannii AYE]	48.9	3.87e-07	23.81	336	211	adeH	AdeH is the outer membrane channel protein of the AdeFGH multidrug efflux complex.	resistance-nodulation-cell division (RND) antibiotic efflux pump	fluoroquinolone antibiotic;tetracycline antibiotic	antibiotic efflux
CJQ_1_00214	399	214	388	43.86	12.95	AAG07762.1	376	168	360	51.33	15.16	AAG07762.1 ARO:3003030 mexV [Pseudomonas aeruginosa PAO1]	68.9	1.15e-13	29.534	193	118	MexV	MexV is the membrane fusion protein of the MexVW-OprM multidrug efflux complex.	resistance-nodulation-cell division (RND) antibiotic efflux pump	acridine dye;disinfecting agents and intercalating dyes;fluoroquinolone antibiotic;macrolide antibiotic;phenicol antibiotic;tetracycline antibiotic	antibiotic efflux
CJQ_1_00215	1048	5	1036	98.47	25.27	EGP45231.1	1045	1	1019	97.51	25.02	EGP45231.1 ARO:3004144 AxyY [Achromobacter insuavis AXX-A]	270	0	25.66	1060	719	AxyY	AxyY is the periplasmic adaptor protein of the AxyXY-OprZ efflux pump system in Achromobacter spp.	resistance-nodulation-cell division (RND) antibiotic efflux pump	aminoglycoside antibiotic;cephalosporin;fluoroquinolone antibiotic;macrolide antibiotic	antibiotic efflux
CJQ_1_00216	445	11	428	93.93	31.75	ABO11759.2	429	4	425	98.37	33.25	ABO11759.2 ARO:3004573 Acinetobacter baumannii AbaF [Acinetobacter baumannii ATCC 17978]	232	1.11e-72	33.8	429	266	Acinetobacter baumannii AbaF	Expression of abaF in E. coli resulted in increased resistance to fosfomycin.	major facilitator superfamily (MFS) antibiotic efflux pump	fosfomycin	antibiotic efflux
CJQ_1_00220	262	23	225	77.48	23.68	AET10445.1	578	351	555	35.47	10.84	AET10445.1 ARO:3004033 tetB(46) [Streptococcus australis]	90.5	2.08e-21	30.556	216	126	tetB(46)	tetB(46) is a subunit of tetAB(46), a heterodimeric ABC transporter, that is required for conferring tetracycline resistance in Streptococcus australis isolated from the oral cavity.	ATP-binding cassette (ABC) antibiotic efflux pump	tetracycline antibiotic	antibiotic efflux
CJQ_1_00230	301	197	292	31.89	9.63	AAC77032.1	107	7	102	89.72	27.1	AAC77032.1 ARO:3003511 Escherichia coli soxS with mutation conferring antibiotic resistance [Escherichia coli str. K-12 substr. MG1655]	52	1.48e-09	30.208	96	67	Escherichia coli soxS with mutation conferring antibiotic resistance	SoxS is a global regulator that up-regulates the expression of AcrAB efflux genes. It also reduces OmpF expression to decrease cell membrane permeability.	ATP-binding cassette (ABC) antibiotic efflux pump;General Bacterial Porin with reduced permeability to beta-lactams;major facilitator superfamily (MFS) antibiotic efflux pump;resistance-nodulation-cell division (RND) antibiotic efflux pump	carbapenem;cephalosporin;cephamycin;fluoroquinolone antibiotic;glycylcycline;monobactam;penam;penem;phenicol antibiotic;rifamycin antibiotic;tetracycline antibiotic;triclosan	antibiotic efflux;antibiotic target alteration;reduced permeability to antibiotic
CJQ_1_00233	399	19	398	95.24	25.3	AAB36568.1	436	27	409	87.84	23.33	AAB36568.1 ARO:3002700 cmlv [Streptomyces venezuelae ATCC 10712]	115	3.01e-29	26.562	384	277	cmlv	cmlv is a chromosome-encoded chloramphenicol phoshotransferase that is found in Streptomyces venezuelae	chloramphenicol phosphotransferase	phenicol antibiotic	antibiotic inactivation
CJQ_1_00235	276	177	268	33.33	8.96	BAA15221.2	127	16	108	73.23	19.69	BAA15221.2 ARO:3000263 marA [Escherichia coli str. K-12 substr. W3110]	45.1	4.72e-07	26.882	93	67	marA	In the presence of antibiotic stress, E. coli overexpresses the global activator protein MarA, which besides inducing MDR efflux pump AcrAB, also down- regulates synthesis of the porin OmpF.	General Bacterial Porin with reduced permeability to beta-lactams;resistance-nodulation-cell division (RND) antibiotic efflux pump	carbapenem;cephalosporin;cephamycin;fluoroquinolone antibiotic;glycylcycline;monobactam;penam;penem;phenicol antibiotic;rifamycin antibiotic;tetracycline antibiotic;triclosan	antibiotic efflux;reduced permeability to antibiotic
CJQ_1_00236	307	7	290	92.51	27.02	ALH22601.1	337	1	289	85.76	25.05	ALH22601.1 ARO:3000620 adeL [Acinetobacter baumannii]	117	0	29.21	291	197	adeL	AdeL is a regulator of AdeFGH in Acinetobacter baumannii. AdeL mutations are associated with AdeFGH overexpression and multidrug resistance.	resistance-nodulation-cell division (RND) antibiotic efflux pump	fluoroquinolone antibiotic;tetracycline antibiotic	antibiotic efflux
CJQ_1_00244	260	3	203	77.31	21.92	AAC74177.1	244	6	202	80.74	22.9	AAC74177.1 ARO:3004049 antibiotic resistant fabG [Escherichia coli str. K-12 substr. MG1655]	81.3	0	28.358	201	140	Escherichia coli fabG mutations conferring resistance to triclosan	fabG is a 3-oxoacyl-acyl carrier protein reductase involved in lipid metabolism and fatty acid biosynthesis.The bacterial biocide Triclosan blocks the final reduction step in fatty acid elongation, inhibiting biosynthesis. Point mutations in fabG can confer resistance to Triclosan.	antibiotic resistant fabG	triclosan	antibiotic target alteration
CJQ_1_00249	214	7	214	97.2	60.28	BAE77933.1	210	6	210	97.62	60.54	BAE77933.1 ARO:3000518 CRP [Escherichia coli str. K-12 substr. W3110]	271	0	62.019	208	76	CRP	CRP is a global regulator that represses MdtEF multidrug efflux pump expression.	resistance-nodulation-cell division (RND) antibiotic efflux pump	fluoroquinolone antibiotic;macrolide antibiotic;penam	antibiotic efflux
CJQ_1_00261	374	14	222	55.88	18.45	ADZ12699.1	258	1	214	82.95	27.39	ADZ12699.1 ARO:3005091 RanA [Riemerella anatipestifer RA-GD]	125	0	33.023	215	137	RanA	RanA is a part of the RanARanB ABC-type efflux system. Alongside RanB, it confers resistance to aminoglycoside antibiotics.	ATP-binding cassette (ABC) antibiotic efflux pump	aminoglycoside antibiotic	antibiotic efflux
CJQ_1_00262	209	1	201	96.17	40.19	CDJ73205	196	1	190	96.94	40.51	CDJ73205 ARO:3003893 Escherichia coli UhpA with mutation conferring resistance to fosfomycin [Escherichia coli str. K-12 substr. MC4100]	137	0	41.791	201	106	Escherichia coli UhpA with mutation conferring resistance to fosfomycin	uhpA is a positive activator of the fosfomycin importer uhpT, thus mutations to uhpA confer fosfomycin resistance by reducing uhpT expression. Both knockout and amino acid substitution mutations have been found that confer resistance, with the Protein Knockout model describing the large, knockout mutations causing loss of function of the gene, and the Protein Variant model describing the amino ac…	antibiotic-resistant UhpT	fosfomycin	antibiotic target alteration
CJQ_1_00263	795	593	794	25.41	8.06	AFK58561.1	355	149	351	57.18	18.14	AFK58561.1 ARO:3003079 Enterococcus faecium liaS mutant conferring daptomycin resistance [Enterococcus faecium DO]	94.7	0	31.731	208	131	Enterococcus faecium liaS mutant conferring daptomycin resistance	liaS is a histidine kinase found in the liaFSR signal transduction pathway. Mutations confer daptomycin resistance.	daptomycin resistant liaS	peptide antibiotic	antibiotic efflux;antibiotic target alteration
CJQ_1_00268	935	148	928	83.53	24.28	AIA35096.1	782	51	779	93.22	27.1	AIA35096.1 ARO:3005059 LptD [Klebsiella pneumoniae subsp. pneumoniae KPNIH10]	309	0	29.068	805	471	LptD	LptD is involved in LPS transport in a ABC Transporter efflux system. It confers resistance to carbapenems, rifamycin, aminocoumarin and peptide antibiotics.	ATP-binding cassette (ABC) antibiotic efflux pump	aminocoumarin antibiotic;carbapenem;peptide antibiotic;rifamycin antibiotic	antibiotic efflux
CJQ_1_00271	267	12	194	68.54	20.53	CEJ95855.1	245	6	178	70.61	21.15	CEJ95855.1 ARO:3004595 erm45 [Staphylococcus fleurettii]	91.3	7.67e-23	29.947	187	113	erm(45)	Erm45 is an rRNA methylase that confers resistances to macrolide, lincosamide, and streptogramin B.	Erm 23S ribosomal RNA methyltransferase	lincosamide antibiotic;macrolide antibiotic;streptogramin antibiotic	antibiotic target alteration
CJQ_1_00286	1247	989	1225	19.01	6.63	AAM15533.1	399	151	386	59.15	20.63	AAM15533.1 ARO:3003688 PvrR [Pseudomonas aeruginosa]	127	0	34.874	238	152	PvrR	PvrR is a response regulator that controls the conversion between antibiotic-resistant and antibiotic-susceptible forms of Pseudomonas aeruginosa biofilms through porin deletion/gene absence	phenotypic variant regulator	aminoglycoside antibiotic	resistance by absence
CJQ_1_00324	606	4	135	21.78	9.27	CAA79727.1	657	18	151	20.4	8.68	CAA79727.1 ARO:3000191 tetQ [Bacteroides fragilis]	113	0	42.537	134	75	tetQ	TetQ is a ribosomal protection protein. Its gene is associated with a conjugative transposon and has been found in both Gram-positive and Gram-negative bacteria.	tetracycline-resistant ribosomal protection protein	tetracycline antibiotic	antibiotic target protection
CJQ_1_00328	361	116	353	65.93	18.07	AAA65954.1	384	139	373	61.2	16.78	AAA65954.1 ARO:3002931 vanSA [Enterococcus faecium]	60.8	4.48e-11	27.413	259	143	vanSA	vanSA, also known as vanS, is a vanS variant found in the vanA gene cluster	glycopeptide resistance gene cluster;vanS	glycopeptide antibiotic	antibiotic target alteration
CJQ_1_00329	478	141	467	68.41	24.67	AAK37618.1	318	23	318	93.08	33.57	AAK37618.1 ARO:3005008 Txr [Vibrio harveyi]	194	3.1e-59	36.061	330	174	TxR	TxR is a putative transcription regulator that plays a role in conferring tetracycline resistance. It is required for proper functioning of Tet35.	ATP-binding cassette (ABC) antibiotic efflux pump	tetracycline antibiotic	antibiotic efflux
CJQ_1_00342	218	10	57	22.02	10.55	ACH50230.1	193	9	55	24.35	11.67	ACH50230.1 ARO:3003379 Salmonella enterica ramR mutants [Salmonella enterica subsp. enterica serovar Agona str. SL483]	42.7	4.54e-06	47.917	48	24	Salmonella enterica ramR mutants	RamR is a repressor that regulates RamA expression. Mutations lead to the upregulation of AcrAB, which is positively regulated by RamA.	resistance-nodulation-cell division (RND) antibiotic efflux pump	cephalosporin;fluoroquinolone antibiotic;glycylcycline;penam;phenicol antibiotic;rifamycin antibiotic;tetracycline antibiotic;triclosan	antibiotic efflux;antibiotic target alteration
CJQ_1_00352	309	6	152	47.57	14.69	ALH22601.1	337	1	147	43.62	13.47	ALH22601.1 ARO:3000620 adeL [Acinetobacter baumannii]	63.9	1.98e-12	30.872	149	99	adeL	AdeL is a regulator of AdeFGH in Acinetobacter baumannii. AdeL mutations are associated with AdeFGH overexpression and multidrug resistance.	resistance-nodulation-cell division (RND) antibiotic efflux pump	fluoroquinolone antibiotic;tetracycline antibiotic	antibiotic efflux
CJQ_1_00353	414	39	406	88.89	21.6	AAK99679.1	399	16	387	93.23	22.65	AAK99679.1 ARO:3000822 pmrA [Streptococcus pneumoniae R6]	57	8.67e-10	24.297	391	254	pmrA	PmrA is a MFS-type efflux pump expressed in Streptococcus pneumoniae that confers low-level resistance to norfloxacin, ciprofloxacin, and acriflavine.	major facilitator superfamily (MFS) antibiotic efflux pump	fluoroquinolone antibiotic	antibiotic efflux
CJQ_1_00364	613	253	567	51.39	14.31	VEG60537.1	731	405	722	43.5	12.11	VEG60537.1 ARO:3004835 Neisseria gonorrhoea pilQ gene conferring resistance to beta-lactam [Neisseria gonorrhoeae]	99.4	0	27.844	334	206	Neisseria gonorrhoeae pilQ gene conferring resistance to beta-lactam	PilQ is an important gonococcal outer membrane component, member of secretin protein family, and involved in Type IV pilus formation.	Penicillin-binding protein mutations conferring resistance to beta-lactam antibiotics	carbapenem;cephalosporin;cephamycin;monobactam;penam	antibiotic target alteration
CJQ_1_00375	408	5	399	96.81	35.79	VEG60537.1	731	301	722	57.73	21.34	VEG60537.1 ARO:3004835 Neisseria gonorrhoea pilQ gene conferring resistance to beta-lactam [Neisseria gonorrhoeae]	266	0	36.967	422	239	Neisseria gonorrhoeae pilQ gene conferring resistance to beta-lactam	PilQ is an important gonococcal outer membrane component, member of secretin protein family, and involved in Type IV pilus formation.	Penicillin-binding protein mutations conferring resistance to beta-lactam antibiotics	carbapenem;cephalosporin;cephamycin;monobactam;penam	antibiotic target alteration
CJQ_1_00379	817	1	761	93.15	39.3	AAB52541.1	798	1	722	90.48	38.17	AAB52541.1 ARO:3004833 Neisseria gonorrhoea PBP1 conferring resistance to beta-lactam [Neisseria meningitidis]	590	0	42.188	768	391	Neisseria gonorrhoeae PBP1 conferring resistance to beta-lactam	Point mutation in Neisseria gonorrhoea PBP1 (ponA) decreases affinity between beta-lactam antibiotic molecule and PBP1, thereby conferring resistance to beta-lactam.	Penicillin-binding protein mutations conferring resistance to beta-lactam antibiotics	carbapenem;cephalosporin;cephamycin;monobactam;penam	antibiotic target alteration
CJQ_1_00403	236	48	199	64.41	23.79	AAB52541.1	798	56	212	19.67	7.27	AAB52541.1 ARO:3004833 Neisseria gonorrhoea PBP1 conferring resistance to beta-lactam [Neisseria meningitidis]	96.7	0	36.943	157	94	Neisseria gonorrhoeae PBP1 conferring resistance to beta-lactam	Point mutation in Neisseria gonorrhoea PBP1 (ponA) decreases affinity between beta-lactam antibiotic molecule and PBP1, thereby conferring resistance to beta-lactam.	Penicillin-binding protein mutations conferring resistance to beta-lactam antibiotics	carbapenem;cephalosporin;cephamycin;monobactam;penam	antibiotic target alteration
CJQ_1_00406	223	1	213	95.52	31.99	ADZ12699.1	258	1	214	82.95	27.78	ADZ12699.1 ARO:3005091 RanA [Riemerella anatipestifer RA-GD]	124	1.04e-35	33.488	215	140	RanA	RanA is a part of the RanARanB ABC-type efflux system. Alongside RanB, it confers resistance to aminoglycoside antibiotics.	ATP-binding cassette (ABC) antibiotic efflux pump	aminoglycoside antibiotic	antibiotic efflux
CJQ_1_00415	221	5	60	25.34	9.05	ACF30254.1	210	9	64	26.67	9.52	ACF30254.1 ARO:3004851 Neisseria gonorrhoea mtrR with mutation conferring resistance [Neisseria gonorrhoeae NCCP11945] Partial	42.7	5.39e-06	35.714	56	36	Neisseria gonorrhoeae mtrR with mutation conferring resistance	MtrR is a repressor of mtrCDE efflux pump expression, point mutations in mtrR increase multidrug resistance.	resistance-nodulation-cell division (RND) antibiotic efflux pump	macrolide antibiotic	antibiotic efflux
CJQ_1_00428	171	7	166	93.57	43.27	AAA25550.1	162	3	154	93.83	43.4	AAA25550.1 ARO:3003105 dfrA3 [Plasmid pAZ1]	144	1.55e-45	46.25	160	78	dfrA3	dfrA3 is an integron-encoded dihydrofolate reductase found in Escherichia coli	trimethoprim resistant dihydrofolate reductase dfr	diaminopyrimidine antibiotic	antibiotic target replacement
CJQ_1_00432	147	1	125	85.03	32.81	AAL19308.1	154	1	126	81.82	31.57	AAL19308.1 ARO:3000504 golS [Salmonella enterica subsp. enterica serovar Typhimurium str. LT2]	83.6	0	38.583	127	75	golS	GolS is a regulator activated by the presence of golD, and promotes the expression of the MdsABC efflux pump.	resistance-nodulation-cell division (RND) antibiotic efflux pump	carbapenem;cephalosporin;cephamycin;monobactam;penam;penem;phenicol antibiotic	antibiotic efflux
CJQ_1_00433	323	1	323	100	36.84	CCP45563.1	263	1	263	100	36.84	CCP45563.1 ARO:3004153 Mycobacterium tuberculosis thyA with mutation conferring resistance to para-aminosalicylic acid [Mycobacterium tuberculosis H37Rv]	196	0	36.842	323	144	Mycobacterium tuberculosis thyA with mutation conferring resistance to para-aminosalicylic acid	Point mutations in the thymidylate synthetase thyA gene shown clinically to confer resistance to para-aminosalicylic acid. Loss-of-function mutations in thyA disrupt the catalytic activity and substrate-binding affinity, thus conferring resistance.	aminosalicylate resistant thymidylate synthase	para-aminosalicylic acid	antibiotic target alteration
CJQ_1_00437	759	180	728	72.33	27.85	CDJ72759	575	4	555	96	36.96	CDJ72759 ARO:3003899 Escherichia coli PtsI with mutation conferring resistance to fosfomycin [Escherichia coli str. K-12 substr. MC4100]	359	0	38.503	561	324	Escherichia coli PtsI with mutation conferring resistance to fosfomycin	PtsI (phosphoenolpyruvate-protein phosphotransferase) is involved in cyclic AMP synthesis, which regulates glpT expression. As a result, mutations to ptsI confer resistance to fosfomycin by affecting the regulation of fosfomycin import.	antibiotic-resistant ptsI phosphotransferase	fosfomycin	antibiotic target alteration
CJQ_1_00446	409	45	292	60.64	18.66	AAM09850.1	323	39	293	78.95	24.29	AAM09850.1 ARO:3002944 vanHD [Enterococcus faecium]	110	3.66e-28	30.769	260	163	vanHD	vanHD is a vanH variant in the vanD gene cluster	glycopeptide resistance gene cluster;vanH	glycopeptide antibiotic	antibiotic target alteration
CJQ_1_00454	188	92	180	47.34	16.81	AAM92461.1	210	53	159	50.95	18.1	AAM92461.1 ARO:3002680 catB8 [Salmonella enterica subsp. enterica serovar Typhi]	64.3	6.7e-14	35.514	107	51	catB8	catB8 is a plasmid or integron-encoded variant of the cat gene found in Klebsiella pneumoniae, Salmonella typhi and Pseudomonas aeruginosa	chloramphenicol acetyltransferase (CAT)	phenicol antibiotic	antibiotic inactivation
CJQ_1_00457	280	39	271	83.21	34.35	AAK37618.1	318	33	263	72.64	29.98	AAK37618.1 ARO:3005008 Txr [Vibrio harveyi]	159	0	41.277	235	132	TxR	TxR is a putative transcription regulator that plays a role in conferring tetracycline resistance. It is required for proper functioning of Tet35.	ATP-binding cassette (ABC) antibiotic efflux pump	tetracycline antibiotic	antibiotic efflux
CJQ_1_00459	329	3	234	70.52	23.12	ADZ12699.1	258	2	238	91.86	30.11	ADZ12699.1 ARO:3005091 RanA [Riemerella anatipestifer RA-GD]	130	0	32.78	241	149	RanA	RanA is a part of the RanARanB ABC-type efflux system. Alongside RanB, it confers resistance to aminoglycoside antibiotics.	ATP-binding cassette (ABC) antibiotic efflux pump	aminoglycoside antibiotic	antibiotic efflux
CJQ_1_00463	309	7	302	95.79	32.47	ALH22601.1	337	1	290	86.05	29.17	ALH22601.1 ARO:3000620 adeL [Acinetobacter baumannii]	145	0	33.893	298	187	adeL	AdeL is a regulator of AdeFGH in Acinetobacter baumannii. AdeL mutations are associated with AdeFGH overexpression and multidrug resistance.	resistance-nodulation-cell division (RND) antibiotic efflux pump	fluoroquinolone antibiotic;tetracycline antibiotic	antibiotic efflux
CJQ_1_00473	404	25	404	94.06	52.66	AAC60781.1	410	30	410	92.93	52.03	AAC60781.1 ARO:3003048 rosA [Yersinia enterocolitica (type O:8)]	382	0	55.99	384	162	rosA	rosA is part of an efflux pump/potassium antiporter system (RosAB) in Yersinia that confers resistance to cationic antimicrobial peptides such as polymyxin B.	major facilitator superfamily (MFS) antibiotic efflux pump	peptide antibiotic	antibiotic efflux
CJQ_1_00479	111	24	111	79.28	70.27	TKW44661.1	112	25	112	78.57	69.64	TKW44661.1 ARO:3005040 YajC [Pseudomonas aeruginosa]	162	0	88.636	88	10	YajC	YajC interacts with the AcrAB-TolC efflux pump in a way that in uncharacterized but is shown to grant increased fitness in the presence of linezolid, rifampicin, and vancomycin.	resistance-nodulation-cell division (RND) antibiotic efflux pump	cephalosporin;fluoroquinolone antibiotic;glycylcycline;penam;phenicol antibiotic;rifamycin antibiotic;tetracycline antibiotic;triclosan	antibiotic efflux
CJQ_1_00487	269	14	240	84.39	27.78	AAV85982.1	644	14	237	34.78	11.45	AAV85982.1 ARO:3000535 macB [Neisseria gonorrhoeae]	89.7	0	32.922	243	128	macB	MacB is an ATP-binding cassette (ABC) transporter that exports macrolides with 14- or 15- membered lactones. It forms an antibiotic efflux complex with MacA and TolC. macB corresponds to 1 locus in Pseudomonas aeruginosa PAO1 and 1 locus in Pseudomonas aeruginosa LESB58.	ATP-binding cassette (ABC) antibiotic efflux pump	macrolide antibiotic	antibiotic efflux
CJQ_1_00504	518	193	517	62.74	23.94	AAK37618.1	318	23	316	92.45	35.27	AAK37618.1 ARO:3005008 Txr [Vibrio harveyi]	213	0	38.154	325	170	TxR	TxR is a putative transcription regulator that plays a role in conferring tetracycline resistance. It is required for proper functioning of Tet35.	ATP-binding cassette (ABC) antibiotic efflux pump	tetracycline antibiotic	antibiotic efflux
CJQ_1_00506	478	61	447	80.96	19.02	AAG08359.1	482	23	426	83.82	19.69	AAG08359.1 ARO:3003682 OpmH [Pseudomonas aeruginosa PAO1]	59.3	2.62e-10	23.488	430	260	OpmH	OpmH is an outer membrane efflux protein required for triclosan-specific efflux pump function.	resistance-nodulation-cell division (RND) antibiotic efflux pump	triclosan	antibiotic efflux
CJQ_1_00507	722	351	705	49.17	14.57	WP_104671188.1	575	192	546	61.74	18.3	WP_104671188.1 ARO:3003948 efrA [Enterococcus faecalis]	164	0	29.64	361	242	efrA	efrA is a part of the EfrAB efflux pump, and both efrA and efrB are necessary to confer drug resistance.	ATP-binding cassette (ABC) antibiotic efflux pump	fluoroquinolone antibiotic;macrolide antibiotic;rifamycin antibiotic	antibiotic efflux
CJQ_1_00512	386	9	383	97.15	47.67	BAE06005.1	385	12	384	96.88	47.54	BAE06005.1 ARO:3003704 mexM [Pseudomonas aeruginosa]	315	0	49.072	377	186	mexM	mexM is the membrane fusion protein of the MexMN-OprM multidrug efflux complex.	resistance-nodulation-cell division (RND) antibiotic efflux pump	phenicol antibiotic	antibiotic efflux
CJQ_1_00513	1030	1	1019	98.93	71.7	BAE06006.1	1036	1	1021	98.55	71.43	BAE06006.1 ARO:3003705 mexN [Pseudomonas aeruginosa]	1479	0	72.478	1021	279	mexN	MexN is the inner membrane transporter of the MexMN-OprM multidrug efflux complex.	resistance-nodulation-cell division (RND) antibiotic efflux pump	phenicol antibiotic	antibiotic efflux
CJQ_1_00514	224	2	219	97.32	38.66	ATC67679.1	219	3	218	98.63	39.18	ATC67679.1 ARO:3000838 arlR [Staphylococcus aureus subsp. aureus str. Newman]	166	0	39.726	219	128	arlR	ArlR is a response regulator that binds to the norA promoter to activate expression. ArlR must first be phosphorylated by ArlS.	major facilitator superfamily (MFS) antibiotic efflux pump	acridine dye;disinfecting agents and intercalating dyes;fluoroquinolone antibiotic	antibiotic efflux
CJQ_1_00515	477	154	453	62.89	14.99	ABD30512.1	451	145	445	66.74	15.91	ABD30512.1 ARO:3000839 arlS [Staphylococcus aureus subsp. aureus NCTC 8325]	124	0	23.841	302	227	arlS	ArlS is a protein histidine kinase that phosphorylates ArlR, a promoter for norA expression.	major facilitator superfamily (MFS) antibiotic efflux pump	acridine dye;disinfecting agents and intercalating dyes;fluoroquinolone antibiotic	antibiotic efflux
CJQ_1_00517	444	12	444	97.52	38.44	AAG04347.1	443	9	443	98.19	38.71	AAG04347.1 ARO:3003686 Pseudomonas aeruginosa oprD with mutation conferring resistance to imipenem [Pseudomonas aeruginosa PAO1]	276	0	39.421	449	242	Pseudomonas aeruginosa oprD with mutation conferring resistance to imipenem	oprD is an outer membrane porin which facilitates the uptake of basic amino acids and imipenem in Pseudomonas aeruginosa.	Outer Membrane Porin (Opr)	carbapenem;cephalosporin;cephamycin;monobactam;penam;penem	reduced permeability to antibiotic
CJQ_1_00523	950	400	950	58	22.63	CDJ72759	575	2	568	98.61	38.47	CDJ72759 ARO:3003899 Escherichia coli PtsI with mutation conferring resistance to fosfomycin [Escherichia coli str. K-12 substr. MC4100]	372	1.04e-118	39.016	569	327	Escherichia coli PtsI with mutation conferring resistance to fosfomycin	PtsI (phosphoenolpyruvate-protein phosphotransferase) is involved in cyclic AMP synthesis, which regulates glpT expression. As a result, mutations to ptsI confer resistance to fosfomycin by affecting the regulation of fosfomycin import.	antibiotic-resistant ptsI phosphotransferase	fosfomycin	antibiotic target alteration
CJQ_1_00533	396	152	325	43.94	12.39	NP_215000.1	480	212	389	37.08	10.45	NP_215000.1 ARO:3005108 Mycobacterium tuberculosis mshA mutations conferring resistance to prothionamide [Mycobacterium tuberculosis H37Rv]	46.6	1.96e-06	28.191	188	111	Mycobacterium tuberculosis mshA mutations conferring resistance to prothionamide	Mutations in Mycobacterium tuberculosis mshA conferring resistance to prothionamide, an analogue to isoniazid	prothionamide resistant mshA	prothionamide	antibiotic target alteration
CJQ_1_00537	240	113	222	45.83	13.64	CDO13836.1	374	243	363	32.35	9.63	CDO13836.1 ARO:3005044 OmpA [Klebsiella pneumoniae]	67.4	6.64e-14	29.752	121	74	OmpA	OmpA is a porin that confers resistance to beta-lactam antibiotics.	General Bacterial Porin with reduced permeability to beta-lactams	carbapenem;cephalosporin;cephamycin;monobactam;penam;penem	reduced permeability to antibiotic
CJQ_1_00538	214	8	213	96.26	26.76	WP_081853183.1	313	61	278	69.65	19.36	WP_081853183.1 ARO:3006885 ELM-1 [Bacteria]	60.8	6.32e-12	27.803	223	139	ELM-1	ELM-1 is a ELM beta-lactamase.	ELM beta-lactamase	carbapenem	antibiotic inactivation
CJQ_1_00539	230	125	219	41.3	13.35	AAG05187.1	428	322	418	22.66	7.33	AAG05187.1 ARO:3005067 ParS [Pseudomonas aeruginosa PAO1]	50.1	4.6e-08	32.323	99	61	ParS	ParS is the sensor component of the two-component ParRS system. Alongside its counterpart ParR, it confers resistance to polycationic antibiotics though regulation of efflux pumps and porins.	Outer Membrane Porin (Opr);resistance-nodulation-cell division (RND) antibiotic efflux pump	acridine dye;aminoglycoside antibiotic;carbapenem;cephalosporin;cephamycin;disinfecting agents and intercalating dyes;fluoroquinolone antibiotic;macrolide antibiotic;monobactam;penam;penem;phenicol antibiotic;tetracycline antibiotic	antibiotic efflux;reduced permeability to antibiotic
CJQ_1_00541	905	842	903	6.85	3.87	AAO82599.1	210	147	208	29.52	16.67	AAO82599.1 ARO:3003792 Enterococcus faecalis liaR mutant conferring daptomycin resistance [Enterococcus faecalis V583]	65.1	1.44e-12	56.452	62	27	Enterococcus faecalis liaR mutant conferring daptomycin resistance	liaR is a response regulator found in the liaFSR signal transduction pathway. Mutations confer daptomycin resistance.	daptomycin resistant liaR	peptide antibiotic	antibiotic efflux;antibiotic target alteration
CJQ_1_00546	258	8	195	72.87	18.51	AAC74177.1	244	6	189	75.41	19.15	AAC74177.1 ARO:3004049 antibiotic resistant fabG [Escherichia coli str. K-12 substr. MG1655]	65.9	1.29e-13	25.397	189	135	Escherichia coli fabG mutations conferring resistance to triclosan	fabG is a 3-oxoacyl-acyl carrier protein reductase involved in lipid metabolism and fatty acid biosynthesis.The bacterial biocide Triclosan blocks the final reduction step in fatty acid elongation, inhibiting biosynthesis. Point mutations in fabG can confer resistance to Triclosan.	antibiotic resistant fabG	triclosan	antibiotic target alteration
CJQ_1_00561	119	1	116	97.48	46.3	NP_253005.1	124	1	119	95.97	45.58	NP_253005.1 ARO:3004069 MvaT [Pseudomonas aeruginosa PAO1]	112	0	47.5	120	58	MvaT	MvaT, a global regulator of virulence genes in P. aeruginosa, has also shown to be able to repress the expression of the MexEF-OprN pump.	resistance-nodulation-cell division (RND) antibiotic efflux pump	diaminopyrimidine antibiotic;fluoroquinolone antibiotic;phenicol antibiotic	antibiotic efflux
CJQ_1_00568	321	54	291	74.14	27.47	AAF36802.1	322	53	295	75.47	27.96	AAF36802.1 ARO:3002945 vanHF [Paenibacillus popilliae ATCC 14706]	129	0	37.052	251	137	vanHF	vanHF is a vanH variant in the vanF gene cluster	glycopeptide resistance gene cluster;vanH	glycopeptide antibiotic	antibiotic target alteration
CJQ_1_00628	943	3	929	98.3	41.07	CAA52296.1	917	2	909	99.02	41.37	CAA52296.1 ARO:3003729 Staphylococcus aureus ileS with mutation conferring resistance to mupirocin [Staphylococcus aureus]	737	0	41.782	943	498	Staphylococcus aureus ileS with mutation conferring resistance to mupirocin	Point mutations to the isoleucyl-tRNA synthetase (ileS) in Staphylococcus aureus that confer resistance to mupirocin.	antibiotic-resistant isoleucyl-tRNA synthetase (ileS)	mupirocin	antibiotic target alteration
CJQ_1_00640	231	11	217	89.61	29.45	APB03214.1	343	27	236	61.22	20.12	APB03214.1 ARO:3003980 tetA(48) [Paenibacillus sp. LC231]	102	0	32.864	213	134	tetA(58)	TetA(58) is a Tetracycline efflux pump described in Paenibacillus sp. LC231, a strain of Paenibacillus isolated from Lechuguilla Cave, NM, USA. Described by Pawlowski et al. 2016.	major facilitator superfamily (MFS) antibiotic efflux pump	tetracycline antibiotic	antibiotic efflux
CJQ_1_00641	250	15	236	88.8	29.86	AAA26793	325	10	219	64.62	21.73	AAA26793 ARO:3003748 oleC [Streptomyces antibioticus]	110	0	33.624	229	126	oleC	oleC is an ABC transporter isolated from Streptomyces antibioticus and is involved in oleandomycin secretion.	ATP-binding cassette (ABC) antibiotic efflux pump	macrolide antibiotic	antibiotic efflux
CJQ_1_00656	431	3	416	96.06	28.15	AIU22003.1	457	12	411	87.53	25.65	AIU22003.1 ARO:3003778 Mycolicibacterium smegmatis mutant ndh conferring resistance to isoniazid [Mycolicibacterium smegmatis]	153	1.08e-42	29.302	430	258	Mycolicibacterium smegmatis ndh with mutation conferring resistance to isoniazid	Mutations in the Mycolicibacterium smegmatis ndh gene that results in increased resistance to isoniazid.	antibiotic resistant ndh	isoniazid	antibiotic target alteration
CJQ_1_00681	491	428	483	11.41	5.09	AFK58562.1	210	148	203	26.67	11.9	AFK58562.1 ARO:3003078 Enterococcus faecium liaR mutant conferring daptomycin resistance [Enterococcus faecium DO]	55.5	1.25e-09	44.643	56	31	Enterococcus faecium liaR mutant conferring daptomycin resistance	liaR is a response regulator found in the liaFSR signal transduction pathway. Mutations confer daptomycin resistance.	daptomycin resistant liaR	peptide antibiotic	antibiotic efflux;antibiotic target alteration
CJQ_1_00691	351	239	338	28.49	9.12	AAL23089.1	107	7	106	93.46	29.91	AAL23089.1 ARO:3003383 Salmonella serovars soxS with mutation conferring antibiotic resistance [Salmonella enterica subsp. enterica serovar Typhimurium str. LT2]	57.4	2.14e-11	32	100	68	Salmonella serovars soxS with mutation conferring antibiotic resistance	SoxS is a global regulator that up-regulates the expression of AcrAB efflux genes. It also reduces OmpF expression to decrease cell membrane permeability.	ATP-binding cassette (ABC) antibiotic efflux pump;General Bacterial Porin with reduced permeability to beta-lactams;major facilitator superfamily (MFS) antibiotic efflux pump;resistance-nodulation-cell division (RND) antibiotic efflux pump	carbapenem;cephalosporin;cephamycin;fluoroquinolone antibiotic;glycylcycline;monobactam;penam;penem;phenicol antibiotic;rifamycin antibiotic;tetracycline antibiotic;triclosan	antibiotic efflux;antibiotic target alteration;reduced permeability to antibiotic
CJQ_1_00693	318	211	311	31.76	8.81	AAL23089.1	107	4	101	91.59	25.39	AAL23089.1 ARO:3003383 Salmonella serovars soxS with mutation conferring antibiotic resistance [Salmonella enterica subsp. enterica serovar Typhimurium str. LT2]	43.5	1.54e-06	27.723	101	70	Salmonella serovars soxS with mutation conferring antibiotic resistance	SoxS is a global regulator that up-regulates the expression of AcrAB efflux genes. It also reduces OmpF expression to decrease cell membrane permeability.	ATP-binding cassette (ABC) antibiotic efflux pump;General Bacterial Porin with reduced permeability to beta-lactams;major facilitator superfamily (MFS) antibiotic efflux pump;resistance-nodulation-cell division (RND) antibiotic efflux pump	carbapenem;cephalosporin;cephamycin;fluoroquinolone antibiotic;glycylcycline;monobactam;penam;penem;phenicol antibiotic;rifamycin antibiotic;tetracycline antibiotic;triclosan	antibiotic efflux;antibiotic target alteration;reduced permeability to antibiotic
CJQ_1_00698	253	5	250	97.23	33.18	AAC74177.1	244	3	240	97.54	33.29	AAC74177.1 ARO:3004049 antibiotic resistant fabG [Escherichia coli str. K-12 substr. MG1655]	102	0	34.127	252	146	Escherichia coli fabG mutations conferring resistance to triclosan	fabG is a 3-oxoacyl-acyl carrier protein reductase involved in lipid metabolism and fatty acid biosynthesis.The bacterial biocide Triclosan blocks the final reduction step in fatty acid elongation, inhibiting biosynthesis. Point mutations in fabG can confer resistance to Triclosan.	antibiotic resistant fabG	triclosan	antibiotic target alteration
CJQ_1_00702	442	12	423	93.21	32.81	ACJ41547.2	434	2	409	94.01	33.09	ACJ41547.2 ARO:3004574 Acinetobacter baumannii AbaQ [Acinetobacter baumannii AB0057]	276	0	35.194	412	263	Acinetobacter baumannii AbaQ	AbaQ is an MFS transporter mainly involved in the extrusion of quinolone-type drugs in A. baumannii	major facilitator superfamily (MFS) antibiotic efflux pump	fluoroquinolone antibiotic	antibiotic efflux
CJQ_1_00736	317	16	311	93.38	26.5	Q8FW76	880	44	337	33.41	9.48	Q8FW76 ARO:3003772 Brucella suis mprF [Brucella suis]	73.9	2e-15	28.383	303	201	Brucella suis mprF	MprF is a integral membrane protein that modifies the negatively-charged phosphatidylglycerol on the membrane surface. This confers resistance to cationic peptides that disrupt the cell membrane, including defensins.	defensin resistant mprF	peptide antibiotic	antibiotic target alteration
CJQ_1_00737	401	9	321	78.05	22.47	ABD31357.1	494	131	448	64.37	18.53	ABD31357.1 ARO:3003074 Staphylococcus aureus cls conferring resistance to daptomycin [Staphylococcus aureus subsp. aureus NCTC 8325]	121	3.77e-31	28.793	323	215	Staphylococcus aureus cls conferring resistance to daptomycin	cls or cardiolipin synthetase is an inner membrane protein that is involved in membrane synthesis. Specific mutations in S. aureus can confer resistance to daptomycin.	daptomycin resistant cls	peptide antibiotic	antibiotic target alteration
CJQ_1_00741	1259	890	1246	28.36	7.49	AAC75429.1	1197	712	1066	29.66	7.84	AAC75429.1 ARO:3000833 evgS [Escherichia coli str. K-12 substr. MG1655]	108	0	26.431	367	248	evgS	EvgS is a sensor protein that phosphorylates the regulatory protein EvgA. evgS corresponds to 1 locus in Pseudomonas aeruginosa PAO1 and 1 locus in Pseudomonas aeruginosa LESB58.	major facilitator superfamily (MFS) antibiotic efflux pump;resistance-nodulation-cell division (RND) antibiotic efflux pump	fluoroquinolone antibiotic;macrolide antibiotic;penam;tetracycline antibiotic	antibiotic efflux
CJQ_1_00749	715	1	713	99.72	58.46	CAG39573	693	1	689	99.42	58.29	CAG39573 ARO:3003735 Staphylococcus mutant fusA gene conferring resistance to fusidic acid [Staphylococcus aureus subsp. aureus MRSA252]	818	0	58.626	713	271	Staphylococcus aureus fusA with mutation conferring resistance to fusidic acid	The mutations to this gene are involved in altering the translation elongation factor G (EF-G) in association with the ribosome to prevent fusidic acid from binding EF-G and preventing translation.	antibiotic resistant fusA	fusidic acid	antibiotic target alteration
CJQ_1_00751	123	1	123	100	69.92	AAK44936.1	124	1	123	99.19	69.36	AAK44936.1 ARO:3003395 Mycobacterium tuberculosis rpsL mutations conferring resistance to Streptomycin [Mycobacterium tuberculosis CDC1551]	176	0	69.919	123	37	Mycobacterium tuberculosis rpsL mutations conferring resistance to Streptomycin	Ribosomal protein S12 stabilizes the highly conserved pseudoknot structure formed by 16S rRNA. Amino acid substitutions in RpsL affect the higher-order structure of 16S rRNA and confer streptomycin resistance by disrupting interactions between 16S rRNA and streptomycin.	antibiotic-resistant rpsL	aminoglycoside antibiotic	antibiotic target alteration
CJQ_1_00752	1399	13	1092	77.2	40.87	AJP09758.1	1161	3	1062	91.3	48.34	AJP09758.1 ARO:3004681 Clostridioides difficile rpoC with mutation conferring resistance to vancomycin [Clostridioides difficile 630]	1156	0	52.941	1105	450	Clostridioides difficile rpoC with mutation conferring resistance to vancomycin	Point mutations in the rpoC region of Clostridioides difficile which confer resistance to vancomycin	vancomycin-resistant beta prime subunit of RNA polymerase (rpoC)	glycopeptide antibiotic	antibiotic target alteration
CJQ_1_00752	1399	1133	1363	16.51	8.15	AJP09758.1	1161	920	1148	19.72	9.73	AJP09758.1 ARO:3004681 Clostridioides difficile rpoC with mutation conferring resistance to vancomycin [Clostridioides difficile 630]	213	0	49.351	231	115	Clostridioides difficile rpoC with mutation conferring resistance to vancomycin	Point mutations in the rpoC region of Clostridioides difficile which confer resistance to vancomycin	vancomycin-resistant beta prime subunit of RNA polymerase (rpoC)	glycopeptide antibiotic	antibiotic target alteration
CJQ_1_00753	1357	1	1357	100	71.84	BAB38333.1	1342	1	1342	100	71.84	BAB38333.1 ARO:3003288 Escherichia coli rpoB mutants conferring resistance to rifampicin [Escherichia coli O157:H7 str. Sakai]	2036	0	71.838	1360	362	Escherichia coli rpoB mutants conferring resistance to rifampicin	Point mutations that occurs in Escherichia coli rpoB resulting in resistance to rifampicin	rifamycin-resistant beta-subunit of RNA polymerase (rpoB)	peptide antibiotic;rifamycin antibiotic	antibiotic target alteration;antibiotic target replacement
CJQ_1_00763	2499	1773	2078	12.24	3.56	ADT64081.1	339	26	339	92.63	26.92	ADT64081.1 ARO:3000813 MexS [Pseudomonas aeruginosa PAK]	107	0	29.063	320	207	MexS	MexS is a suppressor of MexT, which is an activator of the multidrug pump MexEF-OprN. Mutations in MexS lead to multidrug resistance.	resistance-nodulation-cell division (RND) antibiotic efflux pump	diaminopyrimidine antibiotic;fluoroquinolone antibiotic;phenicol antibiotic	antibiotic efflux
CJQ_1_00768	208	71	205	64.9	16.83	AJF82049.1	262	65	194	49.62	12.86	AJF82049.1 ARO:3003573 LpxA [Acinetobacter baumannii]	48.1	8.44e-08	25.926	135	95	LpxA	The LpxA gene is widely known to be involved in the biosynthesis of lipid A in Gram-negative bacteria and mutations to this gene may cause resistance to antimicrobial peptides that target the outer membrane	Acinetobacter mutant Lpx gene conferring resistance to colistin	peptide antibiotic	antibiotic target alteration
CJQ_1_00779	421	3	351	82.9	18.65	AAC75089.1	388	1	337	86.86	19.54	AAC75089.1 ARO:3003577 ugd [Escherichia coli str. K-12 substr. MG1655]	57	8.61e-10	22.493	369	234	ugd	PmrE is required for the synthesis and transfer of 4-amino-4-deoxy-L-arabinose (Ara4N) to Lipid A, which allows gram-negative bacteria to resist the antimicrobial activity of cationic antimicrobial peptides and antibiotics such as polymyxin	pmr phosphoethanolamine transferase	peptide antibiotic	antibiotic target alteration
CJQ_1_00781	480	4	74	14.79	6.2	WP_122630831.1	303	55	126	23.76	9.95	WP_122630831.1 ARO:3006864 CRD3-1 [uncultured bacterium]	46.2	2.41e-06	41.892	74	38	CRD3-1	CRD3-1 is a CRD3 beta-lactamase.	CRD3 beta-lactamase	carbapenem	antibiotic inactivation
CJQ_1_00784	558	2	385	68.82	29.87	CCP44394.1	481	19	395	78.38	34.02	CCP44394.1 ARO:3004721 Mycobacterium tuberculosis rpsA mutations conferring resistance to Pyrazinamide [Mycobacterium tuberculosis H37Rv]	286	0	43.401	394	196	Mycobacterium tuberculosis rpsA mutations conferring resistance to pyrazinamide	RpsA, the 30S ribosomal protein S1 of Mycobacterium tuberculosis, is involved in trans-translation and is targeted by pyrazinonic acid, the active form of the antibiotic pyrazinamide, which disrupts the initiation of mRNA translation. Mutations in the amino acid sequence of rpsA can confer resistance to pyrazinamide maintaining rpsA function.	pyrazinamide resistant rpsA	pyrazinamide	antibiotic target alteration
CJQ_1_00784	558	149	444	53.05	16.62	CCP44394.1	481	83	373	60.5	18.96	CCP44394.1 ARO:3004721 Mycobacterium tuberculosis rpsA mutations conferring resistance to Pyrazinamide [Mycobacterium tuberculosis H37Rv]	141	0	31.333	300	193	Mycobacterium tuberculosis rpsA mutations conferring resistance to pyrazinamide	RpsA, the 30S ribosomal protein S1 of Mycobacterium tuberculosis, is involved in trans-translation and is targeted by pyrazinonic acid, the active form of the antibiotic pyrazinamide, which disrupts the initiation of mRNA translation. Mutations in the amino acid sequence of rpsA can confer resistance to pyrazinamide maintaining rpsA function.	pyrazinamide resistant rpsA	pyrazinamide	antibiotic target alteration
CJQ_1_00789	921	1	917	99.57	84.79	AAG06556.1	923	1	923	100	85.16	AAG06556.1 ARO:3003684 Pseudomonas aeruginosa gyrA conferring resistance to fluoroquinolones [Pseudomonas aeruginosa PAO1]	1558	0	85.157	923	131	Pseudomonas aeruginosa gyrA conferring resistance to fluoroquinolones	Point mutation of Pseudomonas aeruginosa gyrA resulted in the lowered affinity between fluoroquinolones and gyrA. Thus, conferring resistance.	fluoroquinolone resistant gyrA	fluoroquinolone antibiotic;nybomycin	antibiotic target alteration
CJQ_1_00793	246	11	204	78.86	20.73	AAC74177.1	244	3	188	76.23	20.04	AAC74177.1 ARO:3004049 antibiotic resistant fabG [Escherichia coli str. K-12 substr. MG1655]	61.6	2.71e-12	26.289	194	135	Escherichia coli fabG mutations conferring resistance to triclosan	fabG is a 3-oxoacyl-acyl carrier protein reductase involved in lipid metabolism and fatty acid biosynthesis.The bacterial biocide Triclosan blocks the final reduction step in fatty acid elongation, inhibiting biosynthesis. Point mutations in fabG can confer resistance to Triclosan.	antibiotic resistant fabG	triclosan	antibiotic target alteration
CJQ_1_00795	818	584	790	25.31	7.84	AAM15533.1	399	176	379	51.13	15.84	AAM15533.1 ARO:3003688 PvrR [Pseudomonas aeruginosa]	69.3	3.48e-13	30.986	213	132	PvrR	PvrR is a response regulator that controls the conversion between antibiotic-resistant and antibiotic-susceptible forms of Pseudomonas aeruginosa biofilms through porin deletion/gene absence	phenotypic variant regulator	aminoglycoside antibiotic	resistance by absence
CJQ_1_00796	610	25	603	94.92	28.1	AAF67494.2	615	24	593	92.68	27.44	AAF67494.2 ARO:3002522 novA [Streptomyces niveus]	234	0	29.605	608	361	novA	A type III ABC transporter, identified on the novobiocin biosynthetic gene cluster, involved in the transport and resistance of novobiocin.	ATP-binding cassette (ABC) antibiotic efflux pump	aminocoumarin antibiotic	antibiotic efflux
CJQ_1_00841	323	218	315	30.34	8.36	BAA15221.2	127	11	108	77.17	21.26	BAA15221.2 ARO:3000263 marA [Escherichia coli str. K-12 substr. W3110]	53.9	5.66e-10	27.551	98	71	marA	In the presence of antibiotic stress, E. coli overexpresses the global activator protein MarA, which besides inducing MDR efflux pump AcrAB, also down- regulates synthesis of the porin OmpF.	General Bacterial Porin with reduced permeability to beta-lactams;resistance-nodulation-cell division (RND) antibiotic efflux pump	carbapenem;cephalosporin;cephamycin;fluoroquinolone antibiotic;glycylcycline;monobactam;penam;penem;phenicol antibiotic;rifamycin antibiotic;tetracycline antibiotic;triclosan	antibiotic efflux;reduced permeability to antibiotic
CJQ_1_00846	243	3	240	97.94	32.65	ADZ12699.1	258	1	239	92.64	30.88	ADZ12699.1 ARO:3005091 RanA [Riemerella anatipestifer RA-GD]	140	0	33.333	240	157	RanA	RanA is a part of the RanARanB ABC-type efflux system. Alongside RanB, it confers resistance to aminoglycoside antibiotics.	ATP-binding cassette (ABC) antibiotic efflux pump	aminoglycoside antibiotic	antibiotic efflux
CJQ_1_00850	650	81	295	33.08	8.42	AAL27442.1	352	97	308	60.23	15.33	AAL27442.1 ARO:3002907 vanE [Enterococcus faecalis]	52	6.18e-08	25.446	224	146	vanE	VanE is a D-Ala-D-Ala ligase homolog that can synthesize D-Ala-D-Ser, an alternative substrate for peptidoglycan synthesis that reduces vancomycin binding affinity in Enterococcus faecalis	glycopeptide resistance gene cluster;van ligase	glycopeptide antibiotic	antibiotic target alteration
CJQ_1_00870	329	26	314	87.84	35.98	AAB05626.1	323	26	312	88.85	36.39	AAB05626.1 ARO:3002943 vanHB [Enterococcus faecalis]	202	0	40.956	293	163	vanHB	vanHB is a vanH variant in the vanB gene cluster	glycopeptide resistance gene cluster;vanH	glycopeptide antibiotic	antibiotic target alteration
CJQ_1_00871	917	272	597	35.55	11.96	AAC75429.1	1197	698	1022	27.15	9.13	AAC75429.1 ARO:3000833 evgS [Escherichia coli str. K-12 substr. MG1655]	160	0	33.634	333	206	evgS	EvgS is a sensor protein that phosphorylates the regulatory protein EvgA. evgS corresponds to 1 locus in Pseudomonas aeruginosa PAO1 and 1 locus in Pseudomonas aeruginosa LESB58.	major facilitator superfamily (MFS) antibiotic efflux pump;resistance-nodulation-cell division (RND) antibiotic efflux pump	fluoroquinolone antibiotic;macrolide antibiotic;penam;tetracycline antibiotic	antibiotic efflux
CJQ_1_00871	917	665	909	26.72	7.57	AAC75429.1	1197	956	1185	19.21	5.45	AAC75429.1 ARO:3000833 evgS [Escherichia coli str. K-12 substr. MG1655]	69.7	7.55e-13	28.34	247	158	evgS	EvgS is a sensor protein that phosphorylates the regulatory protein EvgA. evgS corresponds to 1 locus in Pseudomonas aeruginosa PAO1 and 1 locus in Pseudomonas aeruginosa LESB58.	major facilitator superfamily (MFS) antibiotic efflux pump;resistance-nodulation-cell division (RND) antibiotic efflux pump	fluoroquinolone antibiotic;macrolide antibiotic;penam;tetracycline antibiotic	antibiotic efflux
CJQ_1_00872	239	1	231	96.65	36.04	AAD51348.1	229	1	225	98.25	36.64	AAD51348.1 ARO:3003066 smeR [Stenotrophomonas maltophilia]	139	1.3e-41	37.288	236	132	smeR	smeR is the responder component of a two component signal transduction system that includes smeS	resistance-nodulation-cell division (RND) antibiotic efflux pump	aminoglycoside antibiotic;cephalosporin;cephamycin;penam	antibiotic efflux
CJQ_1_00873	453	219	445	50.11	17.41	BAB38260.1	457	224	453	50.33	17.49	BAB38260.1 ARO:3000830 cpxA [Escherichia coli O157:H7 str. Sakai]	120	0	34.746	236	139	cpxA	CpxA is a membrane-localized sensor kinase that is activated by envelope stress. It starts a kinase cascade that activates CpxR, which promotes efflux complex expression.	resistance-nodulation-cell division (RND) antibiotic efflux pump	aminocoumarin antibiotic;aminoglycoside antibiotic	antibiotic efflux
CJQ_1_00881	217	80	214	62.21	17.97	AAG06942.1	662	73	187	17.37	5.02	AAG06942.1 ARO:3002985 arnA [Pseudomonas aeruginosa PAO1]	53.5	2.8e-09	28.889	135	76	arnA	arnA modifies lipid A with 4-amino-4-deoxy-L-arabinose (Ara4N) which allows gram-negative bacteria to resist the antimicrobial activity of cationic antimicrobial peptides and antibiotics such as polymyxin. arnA is found in E. coli and P. aeruginosa.	pmr phosphoethanolamine transferase	peptide antibiotic	antibiotic target alteration
CJQ_1_00922	401	72	372	75.06	20.08	AMP42492.1	400	62	355	73.5	19.66	AMP42492.1 ARO:3004441 tet(59) [uncultured bacterium IN-14]	87	1.24e-19	26.752	314	197	tet(59)	Tet(59) is a chromosome-encoded tetracycline efflux pump described from a Chinese pig manure sample.	major facilitator superfamily (MFS) antibiotic efflux pump	tetracycline antibiotic	antibiotic efflux
CJQ_1_00927	186	2	61	32.26	12.37	AAC73566.1	215	3	62	27.91	10.7	AAC73566.1 ARO:3003807 Escherichia coli acrR with mutation conferring multidrug antibiotic resistance [Escherichia coli str. K-12 substr. MG1655]	49.3	2.37e-08	38.333	60	37	Escherichia coli acrR with mutation conferring multidrug antibiotic resistance	AcrR is a repressor of the AcrAB-TolC multidrug efflux complex. AcrR mutations result in high level antibiotic resistance. The mutations associated with this model are specific to E. coli.	resistance-nodulation-cell division (RND) antibiotic efflux pump	cephalosporin;fluoroquinolone antibiotic;glycylcycline;penam;phenicol antibiotic;rifamycin antibiotic;tetracycline antibiotic;triclosan	antibiotic efflux;antibiotic target alteration
CJQ_1_00929	380	26	380	93.42	49.06	CAA56561.1	382	27	380	92.67	48.66	CAA56561.1 ARO:3003553 CepS beta-lactamase [Aeromonas sobria]	355	0	52.514	358	163	CepS	CEPS is a typical class C cephalosporinase found in Aeromonas sobria, first isolated from strain 163a.	CepS beta-lactamase	cephalosporin	antibiotic inactivation
CJQ_1_00936	300	10	295	95.33	26.96	ALH22601.1	337	4	292	85.76	24.25	ALH22601.1 ARO:3000620 adeL [Acinetobacter baumannii]	122	0	28.283	297	194	adeL	AdeL is a regulator of AdeFGH in Acinetobacter baumannii. AdeL mutations are associated with AdeFGH overexpression and multidrug resistance.	resistance-nodulation-cell division (RND) antibiotic efflux pump	fluoroquinolone antibiotic;tetracycline antibiotic	antibiotic efflux
CJQ_1_00939	276	2	255	92.03	42.5	AAC76093.1	273	3	263	95.6	44.15	AAC76093.1 ARO:3002986 bacA [Escherichia coli str. K-12 substr. MG1655]	211	0	46.183	262	132	bacA	The bacA gene product (BacA) recycles undecaprenyl pyrophosphate during cell wall biosynthesis which confers resistance to bacitracin.	undecaprenyl pyrophosphate related proteins	peptide antibiotic	antibiotic target alteration
CJQ_1_00940	544	172	293	22.43	5.52	CAG39047	608	160	282	20.23	4.98	CAG39047 ARO:3003794 Staphylococcus aureus walK with mutation conferring daptomycin resistance [Staphylococcus aureus subsp. aureus MRSA252]	45.8	7.03e-06	24.603	126	88	Staphylococcus aureus walK with mutation conferring resistance to daptomycin	walK is the histidine kinase sensor of a two-component regulatory system controlling peptidoglycan metabolism through regulation of the expression of most of the peptidoglycan hydrolase genes. Mutations in the gene have been found that confer daptomycin resistance.	daptomycin resistant walK	peptide antibiotic	antibiotic target alteration
CJQ_1_00963	340	1	338	99.41	57.94	ADT64081.1	339	1	338	99.71	58.11	ADT64081.1 ARO:3000813 MexS [Pseudomonas aeruginosa PAK]	429	0	58.284	338	141	MexS	MexS is a suppressor of MexT, which is an activator of the multidrug pump MexEF-OprN. Mutations in MexS lead to multidrug resistance.	resistance-nodulation-cell division (RND) antibiotic efflux pump	diaminopyrimidine antibiotic;fluoroquinolone antibiotic;phenicol antibiotic	antibiotic efflux
CJQ_1_00964	304	36	304	88.49	74.34	AAG05880.1	347	79	347	77.52	65.13	AAG05880.1 ARO:3000814 MexT [Pseudomonas aeruginosa PAO1]	439	0	84.015	269	43	MexT	MexT is a LysR-type transcriptional activator that positively regulates the expression of MexEF-OprN, OprD, and MexS.	resistance-nodulation-cell division (RND) antibiotic efflux pump	diaminopyrimidine antibiotic;fluoroquinolone antibiotic;phenicol antibiotic	antibiotic efflux
CJQ_1_00975	269	63	238	65.43	14.34	BAE77933.1	210	28	204	84.29	18.47	BAE77933.1 ARO:3000518 CRP [Escherichia coli str. K-12 substr. W3110]	53.9	1.39e-09	21.91	178	136	CRP	CRP is a global regulator that represses MdtEF multidrug efflux pump expression.	resistance-nodulation-cell division (RND) antibiotic efflux pump	fluoroquinolone antibiotic;macrolide antibiotic;penam	antibiotic efflux
CJQ_1_00982	335	16	198	54.63	16.56	ADT64081.1	339	13	195	53.98	16.37	ADT64081.1 ARO:3000813 MexS [Pseudomonas aeruginosa PAK]	59.3	9.6e-11	30.319	188	121	MexS	MexS is a suppressor of MexT, which is an activator of the multidrug pump MexEF-OprN. Mutations in MexS lead to multidrug resistance.	resistance-nodulation-cell division (RND) antibiotic efflux pump	diaminopyrimidine antibiotic;fluoroquinolone antibiotic;phenicol antibiotic	antibiotic efflux
CJQ_1_00983	285	42	281	84.21	30.27	AAC74177.1	244	5	240	96.72	34.77	AAC74177.1 ARO:3004049 antibiotic resistant fabG [Escherichia coli str. K-12 substr. MG1655]	128	1.21e-36	35.95	242	147	Escherichia coli fabG mutations conferring resistance to triclosan	fabG is a 3-oxoacyl-acyl carrier protein reductase involved in lipid metabolism and fatty acid biosynthesis.The bacterial biocide Triclosan blocks the final reduction step in fatty acid elongation, inhibiting biosynthesis. Point mutations in fabG can confer resistance to Triclosan.	antibiotic resistant fabG	triclosan	antibiotic target alteration
CJQ_1_00985	696	313	689	54.17	12.99	AAC75429.1	1197	711	1082	31.08	7.45	AAC75429.1 ARO:3000833 evgS [Escherichia coli str. K-12 substr. MG1655]	62.8	6.44e-11	23.98	392	263	evgS	EvgS is a sensor protein that phosphorylates the regulatory protein EvgA. evgS corresponds to 1 locus in Pseudomonas aeruginosa PAO1 and 1 locus in Pseudomonas aeruginosa LESB58.	major facilitator superfamily (MFS) antibiotic efflux pump;resistance-nodulation-cell division (RND) antibiotic efflux pump	fluoroquinolone antibiotic;macrolide antibiotic;penam;tetracycline antibiotic	antibiotic efflux
CJQ_1_00986	538	100	391	54.28	12.28	ABD30512.1	451	185	451	59.2	13.39	ABD30512.1 ARO:3000839 arlS [Staphylococcus aureus subsp. aureus NCTC 8325]	57.4	1.48e-09	22.623	305	185	arlS	ArlS is a protein histidine kinase that phosphorylates ArlR, a promoter for norA expression.	major facilitator superfamily (MFS) antibiotic efflux pump	acridine dye;disinfecting agents and intercalating dyes;fluoroquinolone antibiotic	antibiotic efflux
CJQ_1_01006	250	4	186	73.2	20.64	AAC74177.1	244	8	190	75	21.14	AAC74177.1 ARO:3004049 antibiotic resistant fabG [Escherichia coli str. K-12 substr. MG1655]	66.2	7.3e-14	28.191	188	125	Escherichia coli fabG mutations conferring resistance to triclosan	fabG is a 3-oxoacyl-acyl carrier protein reductase involved in lipid metabolism and fatty acid biosynthesis.The bacterial biocide Triclosan blocks the final reduction step in fatty acid elongation, inhibiting biosynthesis. Point mutations in fabG can confer resistance to Triclosan.	antibiotic resistant fabG	triclosan	antibiotic target alteration
CJQ_1_01015	454	3	429	94.05	28.22	AEX49906.1	477	8	432	89.1	26.73	AEX49906.1 ARO:3003583 basS [Pseudomonas aeruginosa]	143	1.03e-38	30	440	280	basS	Histidine protein kinase sensor Lipid A modification gene; part of a two-component system involved in polymyxin resistance that senses high extracellular Fe(2+)	pmr phosphoethanolamine transferase	peptide antibiotic	antibiotic efflux;antibiotic target alteration
CJQ_1_01016	220	1	220	100	56.36	AAG08162.1	221	1	220	99.55	56.11	AAG08162.1 ARO:3003582 basR [Pseudomonas aeruginosa PAO1]	236	0	56.364	220	96	basR	Response regulator for Lipid A modification genes; two-component system involved in polymyxin resistance that senses high extracellular Fe(2+)	pmr phosphoethanolamine transferase	peptide antibiotic	antibiotic efflux;antibiotic target alteration
CJQ_1_01018	268	1	187	69.78	20.04	AAC74177.1	244	1	188	77.05	22.13	AAC74177.1 ARO:3004049 antibiotic resistant fabG [Escherichia coli str. K-12 substr. MG1655]	92.4	0	28.723	188	133	Escherichia coli fabG mutations conferring resistance to triclosan	fabG is a 3-oxoacyl-acyl carrier protein reductase involved in lipid metabolism and fatty acid biosynthesis.The bacterial biocide Triclosan blocks the final reduction step in fatty acid elongation, inhibiting biosynthesis. Point mutations in fabG can confer resistance to Triclosan.	antibiotic resistant fabG	triclosan	antibiotic target alteration
CJQ_1_01023	538	171	534	67.66	16.24	AAC75429.1	1197	711	1073	30.33	7.28	AAC75429.1 ARO:3000833 evgS [Escherichia coli str. K-12 substr. MG1655]	76.3	3e-15	24	375	262	evgS	EvgS is a sensor protein that phosphorylates the regulatory protein EvgA. evgS corresponds to 1 locus in Pseudomonas aeruginosa PAO1 and 1 locus in Pseudomonas aeruginosa LESB58.	major facilitator superfamily (MFS) antibiotic efflux pump;resistance-nodulation-cell division (RND) antibiotic efflux pump	fluoroquinolone antibiotic;macrolide antibiotic;penam;tetracycline antibiotic	antibiotic efflux
CJQ_1_01024	690	295	641	50.29	11.98	AAC75429.1	1197	686	1027	28.57	6.81	AAC75429.1 ARO:3000833 evgS [Escherichia coli str. K-12 substr. MG1655]	58.9	1.1e-09	23.823	361	242	evgS	EvgS is a sensor protein that phosphorylates the regulatory protein EvgA. evgS corresponds to 1 locus in Pseudomonas aeruginosa PAO1 and 1 locus in Pseudomonas aeruginosa LESB58.	major facilitator superfamily (MFS) antibiotic efflux pump;resistance-nodulation-cell division (RND) antibiotic efflux pump	fluoroquinolone antibiotic;macrolide antibiotic;penam;tetracycline antibiotic	antibiotic efflux
CJQ_1_01028	528	262	504	46.02	13.6	AAM15533.1	399	145	386	60.65	17.93	AAM15533.1 ARO:3003688 PvrR [Pseudomonas aeruginosa]	86.3	0	29.555	247	165	PvrR	PvrR is a response regulator that controls the conversion between antibiotic-resistant and antibiotic-susceptible forms of Pseudomonas aeruginosa biofilms through porin deletion/gene absence	phenotypic variant regulator	aminoglycoside antibiotic	resistance by absence
CJQ_1_01033	266	160	257	36.84	10.42	AAC77032.1	107	7	105	92.52	26.17	AAC77032.1 ARO:3003511 Escherichia coli soxS with mutation conferring antibiotic resistance [Escherichia coli str. K-12 substr. MG1655]	44.7	5.37e-07	28.283	99	70	Escherichia coli soxS with mutation conferring antibiotic resistance	SoxS is a global regulator that up-regulates the expression of AcrAB efflux genes. It also reduces OmpF expression to decrease cell membrane permeability.	ATP-binding cassette (ABC) antibiotic efflux pump;General Bacterial Porin with reduced permeability to beta-lactams;major facilitator superfamily (MFS) antibiotic efflux pump;resistance-nodulation-cell division (RND) antibiotic efflux pump	carbapenem;cephalosporin;cephamycin;fluoroquinolone antibiotic;glycylcycline;monobactam;penam;penem;phenicol antibiotic;rifamycin antibiotic;tetracycline antibiotic;triclosan	antibiotic efflux;antibiotic target alteration;reduced permeability to antibiotic
CJQ_1_01044	457	5	430	93.22	30.64	ABO11759.2	429	2	429	99.77	32.8	ABO11759.2 ARO:3004573 Acinetobacter baumannii AbaF [Acinetobacter baumannii ATCC 17978]	219	0	32.874	435	276	Acinetobacter baumannii AbaF	Expression of abaF in E. coli resulted in increased resistance to fosfomycin.	major facilitator superfamily (MFS) antibiotic efflux pump	fosfomycin	antibiotic efflux
CJQ_1_01046	314	36	295	82.8	27.18	AAG05880.1	347	80	337	74.35	24.41	AAG05880.1 ARO:3000814 MexT [Pseudomonas aeruginosa PAO1]	105	1.03e-26	32.83	265	166	MexT	MexT is a LysR-type transcriptional activator that positively regulates the expression of MexEF-OprN, OprD, and MexS.	resistance-nodulation-cell division (RND) antibiotic efflux pump	diaminopyrimidine antibiotic;fluoroquinolone antibiotic;phenicol antibiotic	antibiotic efflux
CJQ_1_01054	434	10	428	96.54	36.69	ABO11759.2	429	6	424	97.67	37.12	ABO11759.2 ARO:3004573 Acinetobacter baumannii AbaF [Acinetobacter baumannii ATCC 17978]	278	0	38.005	421	257	Acinetobacter baumannii AbaF	Expression of abaF in E. coli resulted in increased resistance to fosfomycin.	major facilitator superfamily (MFS) antibiotic efflux pump	fosfomycin	antibiotic efflux
CJQ_1_01055	302	9	133	41.39	11.83	CAA79966.1	295	4	126	41.69	11.91	CAA79966.1 ARO:3003665 NmcR [Enterobacter cloacae]	44.7	3.65e-06	28.571	133	77	NmcR	NmcR is a homolog of the LysR regulator found in Enterobacter cloacae that contribute to the regulation of NmcA beta-lactamase	NmcA beta-lactamase	carbapenem;cephalosporin;cephamycin;penam	antibiotic inactivation
CJQ_1_01062	273	5	213	76.56	20.82	ADZ12699.1	258	1	211	81.78	22.24	ADZ12699.1 ARO:3005091 RanA [Riemerella anatipestifer RA-GD]	116	3.98e-32	27.189	217	144	RanA	RanA is a part of the RanARanB ABC-type efflux system. Alongside RanB, it confers resistance to aminoglycoside antibiotics.	ATP-binding cassette (ABC) antibiotic efflux pump	aminoglycoside antibiotic	antibiotic efflux
CJQ_1_01065	306	204	304	33.01	8.74	AFK13828.1	124	22	123	82.26	21.77	AFK13828.1 ARO:3000823 ramA [Enterobacter cloacae]	42.7	3.91e-06	26.471	102	74	ramA	RamA (resistance antibiotic multiple) is a positive regulator of AcrAB-TolC and leads to high level multidrug resistance in Klebsiella pneumoniae, Salmonella enterica, and Enterobacter aerugenes, increasing the expression of both the mar operon as well as AcrAB. RamA also decreases OmpF expression.	General Bacterial Porin with reduced permeability to beta-lactams;resistance-nodulation-cell division (RND) antibiotic efflux pump	carbapenem;cephalosporin;cephamycin;fluoroquinolone antibiotic;glycylcycline;monobactam;penam;penem;phenicol antibiotic;rifamycin antibiotic;tetracycline antibiotic;triclosan	antibiotic efflux;reduced permeability to antibiotic
CJQ_1_01072	1158	747	1012	22.97	6.43	AAG05187.1	428	160	423	61.68	17.26	AAG05187.1 ARO:3005067 ParS [Pseudomonas aeruginosa PAO1]	100	0	27.985	268	187	ParS	ParS is the sensor component of the two-component ParRS system. Alongside its counterpart ParR, it confers resistance to polycationic antibiotics though regulation of efflux pumps and porins.	Outer Membrane Porin (Opr);resistance-nodulation-cell division (RND) antibiotic efflux pump	acridine dye;aminoglycoside antibiotic;carbapenem;cephalosporin;cephamycin;disinfecting agents and intercalating dyes;fluoroquinolone antibiotic;macrolide antibiotic;monobactam;penam;penem;phenicol antibiotic;tetracycline antibiotic	antibiotic efflux;reduced permeability to antibiotic
CJQ_1_01074	424	31	410	89.62	22.07	ABO11759.2	429	40	425	89.98	22.16	ABO11759.2 ARO:3004573 Acinetobacter baumannii AbaF [Acinetobacter baumannii ATCC 17978]	88.6	0	24.631	406	260	Acinetobacter baumannii AbaF	Expression of abaF in E. coli resulted in increased resistance to fosfomycin.	major facilitator superfamily (MFS) antibiotic efflux pump	fosfomycin	antibiotic efflux
CJQ_1_01077	105	1	102	97.14	35.24	ACJ59254.1	109	1	102	93.58	33.95	ACJ59254.1 ARO:3000768 abeS [Acinetobacter baumannii AB307-0294]	64.7	1e-15	36.275	102	65	abeS	AbeS in an efflux pump of the SMR family of transporters found in Acinetobacter baumannii.	small multidrug resistance (SMR) antibiotic efflux pump	aminocoumarin antibiotic;macrolide antibiotic	antibiotic efflux
CJQ_1_01086	316	39	287	78.8	22.06	AAM09850.1	323	38	298	80.8	22.63	AAM09850.1 ARO:3002944 vanHD [Enterococcus faecium]	84.3	1.87e-19	28	275	158	vanHD	vanHD is a vanH variant in the vanD gene cluster	glycopeptide resistance gene cluster;vanH	glycopeptide antibiotic	antibiotic target alteration
CJQ_1_01087	252	6	229	88.89	25.28	AAC74177.1	244	6	224	89.75	25.53	AAC74177.1 ARO:3004049 antibiotic resistant fabG [Escherichia coli str. K-12 substr. MG1655]	77	1.01e-17	28.444	225	154	Escherichia coli fabG mutations conferring resistance to triclosan	fabG is a 3-oxoacyl-acyl carrier protein reductase involved in lipid metabolism and fatty acid biosynthesis.The bacterial biocide Triclosan blocks the final reduction step in fatty acid elongation, inhibiting biosynthesis. Point mutations in fabG can confer resistance to Triclosan.	antibiotic resistant fabG	triclosan	antibiotic target alteration
CJQ_1_01089	446	35	444	91.93	23.31	ACJ41547.2	434	19	427	94.24	23.89	ACJ41547.2 ARO:3004574 Acinetobacter baumannii AbaQ [Acinetobacter baumannii AB0057]	105	0	25.352	426	285	Acinetobacter baumannii AbaQ	AbaQ is an MFS transporter mainly involved in the extrusion of quinolone-type drugs in A. baumannii	major facilitator superfamily (MFS) antibiotic efflux pump	fluoroquinolone antibiotic	antibiotic efflux
CJQ_1_01090	309	191	295	33.98	10.03	AAL23089.1	107	1	104	97.2	28.7	AAL23089.1 ARO:3003383 Salmonella serovars soxS with mutation conferring antibiotic resistance [Salmonella enterica subsp. enterica serovar Typhimurium str. LT2]	50.4	4.62e-09	29.524	105	73	Salmonella serovars soxS with mutation conferring antibiotic resistance	SoxS is a global regulator that up-regulates the expression of AcrAB efflux genes. It also reduces OmpF expression to decrease cell membrane permeability.	ATP-binding cassette (ABC) antibiotic efflux pump;General Bacterial Porin with reduced permeability to beta-lactams;major facilitator superfamily (MFS) antibiotic efflux pump;resistance-nodulation-cell division (RND) antibiotic efflux pump	carbapenem;cephalosporin;cephamycin;fluoroquinolone antibiotic;glycylcycline;monobactam;penam;penem;phenicol antibiotic;rifamycin antibiotic;tetracycline antibiotic;triclosan	antibiotic efflux;antibiotic target alteration;reduced permeability to antibiotic
CJQ_1_01098	320	15	315	94.06	27.5	ADT64081.1	339	20	337	93.81	27.42	ADT64081.1 ARO:3000813 MexS [Pseudomonas aeruginosa PAK]	74.7	1e-15	29.231	325	199	MexS	MexS is a suppressor of MexT, which is an activator of the multidrug pump MexEF-OprN. Mutations in MexS lead to multidrug resistance.	resistance-nodulation-cell division (RND) antibiotic efflux pump	diaminopyrimidine antibiotic;fluoroquinolone antibiotic;phenicol antibiotic	antibiotic efflux
CJQ_1_01102	854	613	839	26.58	8.9	AAM15533.1	399	151	379	57.39	19.21	AAM15533.1 ARO:3003688 PvrR [Pseudomonas aeruginosa]	115	0	33.478	230	149	PvrR	PvrR is a response regulator that controls the conversion between antibiotic-resistant and antibiotic-susceptible forms of Pseudomonas aeruginosa biofilms through porin deletion/gene absence	phenotypic variant regulator	aminoglycoside antibiotic	resistance by absence
CJQ_1_01104	302	7	295	95.7	36.3	ALH22601.1	337	1	290	86.05	32.64	ALH22601.1 ARO:3000620 adeL [Acinetobacter baumannii]	227	0	37.931	290	179	adeL	AdeL is a regulator of AdeFGH in Acinetobacter baumannii. AdeL mutations are associated with AdeFGH overexpression and multidrug resistance.	resistance-nodulation-cell division (RND) antibiotic efflux pump	fluoroquinolone antibiotic;tetracycline antibiotic	antibiotic efflux
CJQ_1_01105	252	4	252	98.81	35.04	AAC74177.1	244	6	243	97.54	34.59	AAC74177.1 ARO:3004049 antibiotic resistant fabG [Escherichia coli str. K-12 substr. MG1655]	124	0	35.458	251	147	Escherichia coli fabG mutations conferring resistance to triclosan	fabG is a 3-oxoacyl-acyl carrier protein reductase involved in lipid metabolism and fatty acid biosynthesis.The bacterial biocide Triclosan blocks the final reduction step in fatty acid elongation, inhibiting biosynthesis. Point mutations in fabG can confer resistance to Triclosan.	antibiotic resistant fabG	triclosan	antibiotic target alteration
CJQ_1_01106	285	32	278	86.67	24.47	BAE78084.1	343	37	336	87.46	24.7	BAE78084.1 ARO:3003548 mdtN [Escherichia coli str. K-12 substr. W3110]	110	0	28.239	301	161	mdtN	Multidrug resistance efflux pump. Could be involved in resistance to puromycin, acriflavine and tetraphenylarsonium chloride.	major facilitator superfamily (MFS) antibiotic efflux pump	acridine dye;disinfecting agents and intercalating dyes;nucleoside antibiotic	antibiotic efflux
CJQ_1_01114	754	490	712	29.58	10.74	AAM15533.1	399	169	390	55.64	20.21	AAM15533.1 ARO:3003688 PvrR [Pseudomonas aeruginosa]	125	1.09e-31	36.323	223	141	PvrR	PvrR is a response regulator that controls the conversion between antibiotic-resistant and antibiotic-susceptible forms of Pseudomonas aeruginosa biofilms through porin deletion/gene absence	phenotypic variant regulator	aminoglycoside antibiotic	resistance by absence
CJQ_1_01120	255	6	242	92.94	30.2	APB03214.1	343	18	236	63.85	20.74	APB03214.1 ARO:3003980 tetA(48) [Paenibacillus sp. LC231]	113	0	32.489	237	142	tetA(58)	TetA(58) is a Tetracycline efflux pump described in Paenibacillus sp. LC231, a strain of Paenibacillus isolated from Lechuguilla Cave, NM, USA. Described by Pawlowski et al. 2016.	major facilitator superfamily (MFS) antibiotic efflux pump	tetracycline antibiotic	antibiotic efflux
CJQ_1_01121	233	10	220	90.56	28.91	AAA26793	325	9	218	64.62	20.63	AAA26793 ARO:3003748 oleC [Streptomyces antibioticus]	106	0	31.925	213	140	oleC	oleC is an ABC transporter isolated from Streptomyces antibioticus and is involved in oleandomycin secretion.	ATP-binding cassette (ABC) antibiotic efflux pump	macrolide antibiotic	antibiotic efflux
CJQ_1_01128	381	12	191	47.24	13.83	AHL39324.1	381	30	204	45.93	13.45	AHL39324.1 ARO:3002095 CMY-82 [Citrobacter freundii]	64.3	3.75e-12	29.282	181	121	CMY-82	CMY-82 is a beta-lactamase. From the Lahey list of CMY beta-lactamases.	CMY beta-lactamase	cephamycin	antibiotic inactivation
CJQ_1_01134	231	124	230	46.32	17.82	CDO13836.1	374	248	363	31.02	11.93	CDO13836.1 ARO:3005044 OmpA [Klebsiella pneumoniae]	74.7	1.82e-16	38.462	117	61	OmpA	OmpA is a porin that confers resistance to beta-lactam antibiotics.	General Bacterial Porin with reduced permeability to beta-lactams	carbapenem;cephalosporin;cephamycin;monobactam;penam;penem	reduced permeability to antibiotic
CJQ_1_01154	679	14	85	10.6	3.68	CAA52296.1	917	57	128	7.85	2.73	CAA52296.1 ARO:3003729 Staphylococcus aureus ileS with mutation conferring resistance to mupirocin [Staphylococcus aureus]	48.5	1.71e-06	34.722	72	47	Staphylococcus aureus ileS with mutation conferring resistance to mupirocin	Point mutations to the isoleucyl-tRNA synthetase (ileS) in Staphylococcus aureus that confer resistance to mupirocin.	antibiotic-resistant isoleucyl-tRNA synthetase (ileS)	mupirocin	antibiotic target alteration
CJQ_1_01157	207	5	206	97.58	33.82	BAB36671.1	204	4	203	98.04	33.97	BAB36671.1 ARO:3000832 evgA [Escherichia coli O157:H7 str. Sakai]	140	0	34.653	202	130	evgA	EvgA, when phosphorylated, is a positive regulator for efflux protein complexes emrKY and mdtEF. While usually phosphorylated in a EvgS dependent manner, it can be phosphorylated in the absence of EvgS when overexpressed.	major facilitator superfamily (MFS) antibiotic efflux pump;resistance-nodulation-cell division (RND) antibiotic efflux pump	fluoroquinolone antibiotic;macrolide antibiotic;penam;tetracycline antibiotic	antibiotic efflux
CJQ_1_01160	311	204	280	24.76	8.35	CDO13836.1	374	277	362	22.99	7.75	CDO13836.1 ARO:3005044 OmpA [Klebsiella pneumoniae]	46.2	1.49e-06	33.721	86	48	OmpA	OmpA is a porin that confers resistance to beta-lactam antibiotics.	General Bacterial Porin with reduced permeability to beta-lactams	carbapenem;cephalosporin;cephamycin;monobactam;penam;penem	reduced permeability to antibiotic
CJQ_1_01171	773	166	701	69.34	21.38	AFC91828.1	719	69	622	77.05	23.76	AFC91828.1 ARO:3003041 Streptococcus pneumoniae PBP1a conferring resistance to amoxicillin [Streptococcus pneumoniae]	198	1.04e-54	30.836	574	339	Streptococcus pneumoniae PBP1a conferring resistance to amoxicillin	PBP1a is a penicillin-binding protein found in Streptococcus pneumoniae	Penicillin-binding protein mutations conferring resistance to beta-lactam antibiotics	carbapenem;cephalosporin;cephamycin;monobactam;penam	antibiotic target alteration
CJQ_1_01175	255	2	225	87.84	24.88	APB03214.1	343	18	235	63.56	18	APB03214.1 ARO:3003980 tetA(48) [Paenibacillus sp. LC231]	80.5	0	28.319	226	152	tetA(58)	TetA(58) is a Tetracycline efflux pump described in Paenibacillus sp. LC231, a strain of Paenibacillus isolated from Lechuguilla Cave, NM, USA. Described by Pawlowski et al. 2016.	major facilitator superfamily (MFS) antibiotic efflux pump	tetracycline antibiotic	antibiotic efflux
CJQ_1_01184	989	727	977	25.38	7.31	CAG39047	608	357	601	40.3	11.6	CAG39047 ARO:3003794 Staphylococcus aureus walK with mutation conferring daptomycin resistance [Staphylococcus aureus subsp. aureus MRSA252]	76.3	6e-15	28.788	264	156	Staphylococcus aureus walK with mutation conferring resistance to daptomycin	walK is the histidine kinase sensor of a two-component regulatory system controlling peptidoglycan metabolism through regulation of the expression of most of the peptidoglycan hydrolase genes. Mutations in the gene have been found that confer daptomycin resistance.	daptomycin resistant walK	peptide antibiotic	antibiotic target alteration
CJQ_1_01185	481	152	471	66.53	25.38	AAK37618.1	318	23	317	92.77	35.39	AAK37618.1 ARO:3005008 Txr [Vibrio harveyi]	222	1.41e-69	38.154	325	166	TxR	TxR is a putative transcription regulator that plays a role in conferring tetracycline resistance. It is required for proper functioning of Tet35.	ATP-binding cassette (ABC) antibiotic efflux pump	tetracycline antibiotic	antibiotic efflux
CJQ_1_01195	701	623	691	9.84	4.92	CCP44394.1	481	209	277	14.35	7.17	CCP44394.1 ARO:3004721 Mycobacterium tuberculosis rpsA mutations conferring resistance to Pyrazinamide [Mycobacterium tuberculosis H37Rv]	57.8	1.51e-09	50	70	33	Mycobacterium tuberculosis rpsA mutations conferring resistance to pyrazinamide	RpsA, the 30S ribosomal protein S1 of Mycobacterium tuberculosis, is involved in trans-translation and is targeted by pyrazinonic acid, the active form of the antibiotic pyrazinamide, which disrupts the initiation of mRNA translation. Mutations in the amino acid sequence of rpsA can confer resistance to pyrazinamide maintaining rpsA function.	pyrazinamide resistant rpsA	pyrazinamide	antibiotic target alteration
CJQ_1_01195	701	622	691	9.99	4.64	CCP44394.1	481	293	363	14.76	6.86	CCP44394.1 ARO:3004721 Mycobacterium tuberculosis rpsA mutations conferring resistance to Pyrazinamide [Mycobacterium tuberculosis H37Rv]	56.6	4.03e-09	46.479	71	37	Mycobacterium tuberculosis rpsA mutations conferring resistance to pyrazinamide	RpsA, the 30S ribosomal protein S1 of Mycobacterium tuberculosis, is involved in trans-translation and is targeted by pyrazinonic acid, the active form of the antibiotic pyrazinamide, which disrupts the initiation of mRNA translation. Mutations in the amino acid sequence of rpsA can confer resistance to pyrazinamide maintaining rpsA function.	pyrazinamide resistant rpsA	pyrazinamide	antibiotic target alteration
CJQ_1_01199	842	347	530	21.85	7.38	CAA67349.1	397	15	237	56.17	18.97	CAA67349.1 ARO:3003359 Streptomyces cinnamoneus EF-Tu mutants conferring resistance to elfamycin [Streptomyces cinnamoneus]	77	1e-15	33.778	225	106	Streptomyces cinnamoneus EF-Tu mutants conferring resistance to elfamycin	Sequence variants of Streptomyces cinnamoneus elongation factor Tu that confer resistance to elfamycin antibiotics.	elfamycin resistant EF-Tu	elfamycin antibiotic	antibiotic target alteration
CJQ_1_01206	283	17	283	94.35	55.48	AAC76209.2	282	10	276	94.68	55.67	AAC76209.2 ARO:3003386 Escherichia coli folP with mutation conferring resistance to sulfonamides [Escherichia coli str. K-12 substr. MG1655]	321	0	58.801	267	110	Escherichia coli folP with mutation conferring resistance to sulfonamides	Point mutations in Escherichia coli dihydropteroate synthase folP prevent sulfonamide antibiotics from inhibiting its role in folate synthesis, thus conferring sulfonamide resistance.	sulfonamide resistant dihydropteroate synthase folP	sulfonamide antibiotic;sulfone antibiotic	antibiotic target alteration
CJQ_1_01266	368	222	324	27.99	7.88	AAC77032.1	107	2	104	96.26	27.1	AAC77032.1 ARO:3003511 Escherichia coli soxS with mutation conferring antibiotic resistance [Escherichia coli str. K-12 substr. MG1655]	55.8	9.23e-11	28.155	103	74	Escherichia coli soxS with mutation conferring antibiotic resistance	SoxS is a global regulator that up-regulates the expression of AcrAB efflux genes. It also reduces OmpF expression to decrease cell membrane permeability.	ATP-binding cassette (ABC) antibiotic efflux pump;General Bacterial Porin with reduced permeability to beta-lactams;major facilitator superfamily (MFS) antibiotic efflux pump;resistance-nodulation-cell division (RND) antibiotic efflux pump	carbapenem;cephalosporin;cephamycin;fluoroquinolone antibiotic;glycylcycline;monobactam;penam;penem;phenicol antibiotic;rifamycin antibiotic;tetracycline antibiotic;triclosan	antibiotic efflux;antibiotic target alteration;reduced permeability to antibiotic
CJQ_1_01270	392	26	255	58.67	20.07	AAV85982.1	644	15	230	33.54	11.47	AAV85982.1 ARO:3000535 macB [Neisseria gonorrhoeae]	117	0	34.199	231	136	macB	MacB is an ATP-binding cassette (ABC) transporter that exports macrolides with 14- or 15- membered lactones. It forms an antibiotic efflux complex with MacA and TolC. macB corresponds to 1 locus in Pseudomonas aeruginosa PAO1 and 1 locus in Pseudomonas aeruginosa LESB58.	ATP-binding cassette (ABC) antibiotic efflux pump	macrolide antibiotic	antibiotic efflux
CJQ_1_01286	631	242	626	61.01	15.33	AAC75429.1	1197	686	1073	32.41	8.14	AAC75429.1 ARO:3000833 evgS [Escherichia coli str. K-12 substr. MG1655]	92.8	2.9e-20	25.123	406	265	evgS	EvgS is a sensor protein that phosphorylates the regulatory protein EvgA. evgS corresponds to 1 locus in Pseudomonas aeruginosa PAO1 and 1 locus in Pseudomonas aeruginosa LESB58.	major facilitator superfamily (MFS) antibiotic efflux pump;resistance-nodulation-cell division (RND) antibiotic efflux pump	fluoroquinolone antibiotic;macrolide antibiotic;penam;tetracycline antibiotic	antibiotic efflux
CJQ_1_01287	221	1	210	95.02	28.68	AFK58562.1	210	1	203	96.67	29.17	AFK58562.1 ARO:3003078 Enterococcus faecium liaR mutant conferring daptomycin resistance [Enterococcus faecium DO]	88.2	0	30.18	222	124	Enterococcus faecium liaR mutant conferring daptomycin resistance	liaR is a response regulator found in the liaFSR signal transduction pathway. Mutations confer daptomycin resistance.	daptomycin resistant liaR	peptide antibiotic	antibiotic efflux;antibiotic target alteration
CJQ_1_01289	263	21	222	76.81	19.76	APB03215.1	271	38	233	72.32	18.61	APB03215.1 ARO:3003981 tetB(48) [Paenibacillus sp. LC231]	57	2.01e-10	25.728	206	139	tetB(58)	Tetracycline resistant TetB(58) efflux pump found in Paenibacillus sp. LC231, a strain of Paenibacillus isolated from Lechuguilla Cave, NM, USA. Described by Pawlowski et al. 2016.	major facilitator superfamily (MFS) antibiotic efflux pump	tetracycline antibiotic	antibiotic efflux
CJQ_1_01290	246	3	244	98.37	31.37	APB03214.1	343	17	268	73.47	23.43	APB03214.1 ARO:3003980 tetA(48) [Paenibacillus sp. LC231]	118	0	31.89	254	159	tetA(58)	TetA(58) is a Tetracycline efflux pump described in Paenibacillus sp. LC231, a strain of Paenibacillus isolated from Lechuguilla Cave, NM, USA. Described by Pawlowski et al. 2016.	major facilitator superfamily (MFS) antibiotic efflux pump	tetracycline antibiotic	antibiotic efflux
CJQ_1_01293	424	225	421	46.46	13.8	AFK58561.1	355	151	350	56.34	16.73	AFK58561.1 ARO:3003079 Enterococcus faecium liaS mutant conferring daptomycin resistance [Enterococcus faecium DO]	89	2.31e-20	29.703	202	135	Enterococcus faecium liaS mutant conferring daptomycin resistance	liaS is a histidine kinase found in the liaFSR signal transduction pathway. Mutations confer daptomycin resistance.	daptomycin resistant liaS	peptide antibiotic	antibiotic efflux;antibiotic target alteration
CJQ_1_01294	212	1	198	93.4	36.89	CDJ73205	196	2	188	95.41	37.69	CDJ73205 ARO:3003893 Escherichia coli UhpA with mutation conferring resistance to fosfomycin [Escherichia coli str. K-12 substr. MC4100]	113	0	39.5	200	106	Escherichia coli UhpA with mutation conferring resistance to fosfomycin	uhpA is a positive activator of the fosfomycin importer uhpT, thus mutations to uhpA confer fosfomycin resistance by reducing uhpT expression. Both knockout and amino acid substitution mutations have been found that confer resistance, with the Protein Knockout model describing the large, knockout mutations causing loss of function of the gene, and the Protein Variant model describing the amino ac…	antibiotic-resistant UhpT	fosfomycin	antibiotic target alteration
CJQ_1_01295	219	48	189	64.84	16.95	AZP56652.1	218	9	161	70.18	18.35	AZP56652.1 ARO:3004627 QnrS15 [Escherichia coli]	55.5	2.34e-10	26.144	153	102	QnrS15	QnrS15 is a plasmid-mediated quinolone resistance protein.	quinolone resistance protein (qnr)	fluoroquinolone antibiotic	antibiotic target protection
CJQ_1_01300	312	47	236	60.9	14.05	AAF94716.1	390	104	306	52.05	12.01	AAF94716.1 ARO:3004289 Vibrio cholerae varG [Vibrio cholerae O1 biovar El Tor str. N16961]	48.9	2.02e-07	23.077	208	137	Vibrio cholerae varG	varG is an Ambler class B metallo-beta-lactamase found on the antibiotic resistance var regulon in Vibrio cholerae, along with an antibiotic efflux pump varABCDEF. These genes are organized as a regulon under the control of VarR transcriptional activator. VarG was shown to have beta-lactamase activity against penicillins, carbapenems and cephalosporins in-vitro. Described by Lin HV et al. 2017.	subclass B1 Vibrio cholerae varG beta-lactamase	carbapenem	antibiotic inactivation
CJQ_1_01310	554	177	552	67.87	17.48	AAC75429.1	1197	689	1073	32.16	8.28	AAC75429.1 ARO:3000833 evgS [Escherichia coli str. K-12 substr. MG1655]	95.9	2.24e-21	25.758	396	263	evgS	EvgS is a sensor protein that phosphorylates the regulatory protein EvgA. evgS corresponds to 1 locus in Pseudomonas aeruginosa PAO1 and 1 locus in Pseudomonas aeruginosa LESB58.	major facilitator superfamily (MFS) antibiotic efflux pump;resistance-nodulation-cell division (RND) antibiotic efflux pump	fluoroquinolone antibiotic;macrolide antibiotic;penam;tetracycline antibiotic	antibiotic efflux
CJQ_1_01318	471	14	464	95.75	76.01	AAG05883.1	472	21	470	95.34	75.68	AAG05883.1 ARO:3000805 OprN [Pseudomonas aeruginosa PAO1]	655	0	79.379	451	92	OprN	OprN is the outer membrane channel component of the MexEF-OprN multidrug efflux complex.	resistance-nodulation-cell division (RND) antibiotic efflux pump	diaminopyrimidine antibiotic;fluoroquinolone antibiotic;phenicol antibiotic	antibiotic efflux
CJQ_1_01319	1059	1	1049	99.06	88.12	AAG05882.1	1062	1	1051	98.96	88.04	AAG05882.1 ARO:3000804 MexF [Pseudomonas aeruginosa PAO1]	1825	0	88.963	1051	114	MexF	MexF is the multidrug inner membrane transporter of the MexEF-OprN complex. mexF corresponds to 2 loci in Pseudomonas aeruginosa PAO1 (gene name: mexF/mexB) and 4 loci in Pseudomonas aeruginosa LESB58 (gene name: mexD/mexB).	resistance-nodulation-cell division (RND) antibiotic efflux pump	diaminopyrimidine antibiotic;fluoroquinolone antibiotic;phenicol antibiotic	antibiotic efflux
CJQ_1_01320	413	1	413	100	70.91	AAG05881.1	414	1	414	100	70.91	AAG05881.1 ARO:3000803 MexE [Pseudomonas aeruginosa PAO1]	546	0	70.913	416	116	MexE	MexE is the membrane fusion protein of the MexEF-OprN multidrug efflux complex.	resistance-nodulation-cell division (RND) antibiotic efflux pump	diaminopyrimidine antibiotic;fluoroquinolone antibiotic;phenicol antibiotic	antibiotic efflux
CJQ_1_01326	1088	578	1050	43.47	16.5	AAC75429.1	1197	691	1159	39.18	14.87	AAC75429.1 ARO:3000833 evgS [Escherichia coli str. K-12 substr. MG1655]	269	0	37.945	477	284	evgS	EvgS is a sensor protein that phosphorylates the regulatory protein EvgA. evgS corresponds to 1 locus in Pseudomonas aeruginosa PAO1 and 1 locus in Pseudomonas aeruginosa LESB58.	major facilitator superfamily (MFS) antibiotic efflux pump;resistance-nodulation-cell division (RND) antibiotic efflux pump	fluoroquinolone antibiotic;macrolide antibiotic;penam;tetracycline antibiotic	antibiotic efflux
CJQ_1_01326	1088	1	585	53.77	13.46	AAC75429.1	1197	1	585	48.87	12.24	AAC75429.1 ARO:3000833 evgS [Escherichia coli str. K-12 substr. MG1655]	207	0	25.042	599	421	evgS	EvgS is a sensor protein that phosphorylates the regulatory protein EvgA. evgS corresponds to 1 locus in Pseudomonas aeruginosa PAO1 and 1 locus in Pseudomonas aeruginosa LESB58.	major facilitator superfamily (MFS) antibiotic efflux pump;resistance-nodulation-cell division (RND) antibiotic efflux pump	fluoroquinolone antibiotic;macrolide antibiotic;penam;tetracycline antibiotic	antibiotic efflux
CJQ_1_01327	204	3	203	98.53	33.49	BAB36671.1	204	2	203	99.02	33.66	BAB36671.1 ARO:3000832 evgA [Escherichia coli O157:H7 str. Sakai]	142	1.19e-43	33.99	203	131	evgA	EvgA, when phosphorylated, is a positive regulator for efflux protein complexes emrKY and mdtEF. While usually phosphorylated in a EvgS dependent manner, it can be phosphorylated in the absence of EvgS when overexpressed.	major facilitator superfamily (MFS) antibiotic efflux pump;resistance-nodulation-cell division (RND) antibiotic efflux pump	fluoroquinolone antibiotic;macrolide antibiotic;penam;tetracycline antibiotic	antibiotic efflux
CJQ_1_01332	159	59	136	49.06	19.5	AAA88560.1	189	87	160	39.15	15.56	AAA88560.1 ARO:3004699 sta [Streptomyces lavendulae]	51.2	1.83e-09	39.744	78	43	sta	Streptothricin acetyltransferase gene (STAT gene) that confers streptothricin resistance on Escherichia coli and Bacillus subtilis.	streptothricin acetyltransferase (SAT)	nucleoside antibiotic	antibiotic inactivation
CJQ_1_01346	430	14	407	91.63	26.44	ACJ41547.2	434	15	413	91.94	26.53	ACJ41547.2 ARO:3004574 Acinetobacter baumannii AbaQ [Acinetobacter baumannii AB0057]	166	1.05e-47	28.856	402	275	Acinetobacter baumannii AbaQ	AbaQ is an MFS transporter mainly involved in the extrusion of quinolone-type drugs in A. baumannii	major facilitator superfamily (MFS) antibiotic efflux pump	fluoroquinolone antibiotic	antibiotic efflux
CJQ_1_01347	320	67	307	75.31	23.15	AAB05626.1	323	73	315	75.23	23.13	AAB05626.1 ARO:3002943 vanHB [Enterococcus faecalis]	102	0	30.739	257	148	vanHB	vanHB is a vanH variant in the vanB gene cluster	glycopeptide resistance gene cluster;vanH	glycopeptide antibiotic	antibiotic target alteration
CJQ_1_01350	394	8	390	97.21	36.67	AAB36568.1	436	13	403	89.68	33.83	AAB36568.1 ARO:3002700 cmlv [Streptomyces venezuelae ATCC 10712]	206	0	37.722	395	230	cmlv	cmlv is a chromosome-encoded chloramphenicol phoshotransferase that is found in Streptomyces venezuelae	chloramphenicol phosphotransferase	phenicol antibiotic	antibiotic inactivation
CJQ_1_01351	293	3	125	41.98	13.88	CAA79966.1	295	7	127	41.02	13.56	CAA79966.1 ARO:3003665 NmcR [Enterobacter cloacae]	60.8	1.53e-11	33.071	127	75	NmcR	NmcR is a homolog of the LysR regulator found in Enterobacter cloacae that contribute to the regulation of NmcA beta-lactamase	NmcA beta-lactamase	carbapenem;cephalosporin;cephamycin;penam	antibiotic inactivation
CJQ_1_01353	297	1	295	99.33	30	ALH22601.1	337	3	299	88.13	26.62	ALH22601.1 ARO:3000620 adeL [Acinetobacter baumannii]	144	0	30.201	298	204	adeL	AdeL is a regulator of AdeFGH in Acinetobacter baumannii. AdeL mutations are associated with AdeFGH overexpression and multidrug resistance.	resistance-nodulation-cell division (RND) antibiotic efflux pump	fluoroquinolone antibiotic;tetracycline antibiotic	antibiotic efflux
CJQ_1_01354	250	4	250	98.8	31.88	AAC74177.1	244	2	244	99.59	32.14	AAC74177.1 ARO:3004049 antibiotic resistant fabG [Escherichia coli str. K-12 substr. MG1655]	107	0	32.271	251	158	Escherichia coli fabG mutations conferring resistance to triclosan	fabG is a 3-oxoacyl-acyl carrier protein reductase involved in lipid metabolism and fatty acid biosynthesis.The bacterial biocide Triclosan blocks the final reduction step in fatty acid elongation, inhibiting biosynthesis. Point mutations in fabG can confer resistance to Triclosan.	antibiotic resistant fabG	triclosan	antibiotic target alteration
CJQ_1_01357	346	12	343	95.95	22.85	ADT64081.1	339	12	335	95.58	22.76	ADT64081.1 ARO:3000813 MexS [Pseudomonas aeruginosa PAK]	53.5	6.51e-09	23.81	357	214	MexS	MexS is a suppressor of MexT, which is an activator of the multidrug pump MexEF-OprN. Mutations in MexS lead to multidrug resistance.	resistance-nodulation-cell division (RND) antibiotic efflux pump	diaminopyrimidine antibiotic;fluoroquinolone antibiotic;phenicol antibiotic	antibiotic efflux
CJQ_1_01358	299	13	274	87.63	21.98	AHA41499.1	350	46	326	80.29	20.14	AHA41499.1 ARO:3002948 vanHO [Rhodococcus hoagii]	82.4	0	25.087	287	184	vanHO	vanHO is a vanH variant in the vanO gene cluster	glycopeptide resistance gene cluster;vanH	glycopeptide antibiotic	antibiotic target alteration
CJQ_1_01369	424	8	420	97.41	29.46	AAG04347.1	443	2	438	98.65	29.83	AAG04347.1 ARO:3003686 Pseudomonas aeruginosa oprD with mutation conferring resistance to imipenem [Pseudomonas aeruginosa PAO1]	176	1.47e-51	30.243	453	260	Pseudomonas aeruginosa oprD with mutation conferring resistance to imipenem	oprD is an outer membrane porin which facilitates the uptake of basic amino acids and imipenem in Pseudomonas aeruginosa.	Outer Membrane Porin (Opr)	carbapenem;cephalosporin;cephamycin;monobactam;penam;penem	reduced permeability to antibiotic
CJQ_1_01370	446	18	426	91.7	35.67	ACJ41547.2	434	2	409	94.01	36.57	ACJ41547.2 ARO:3004574 Acinetobacter baumannii AbaQ [Acinetobacter baumannii AB0057]	289	0	38.902	419	235	Acinetobacter baumannii AbaQ	AbaQ is an MFS transporter mainly involved in the extrusion of quinolone-type drugs in A. baumannii	major facilitator superfamily (MFS) antibiotic efflux pump	fluoroquinolone antibiotic	antibiotic efflux
CJQ_1_01375	1276	1016	1267	19.75	6.76	AAM15533.1	399	132	390	64.91	22.22	AAM15533.1 ARO:3003688 PvrR [Pseudomonas aeruginosa]	139	0	34.231	260	162	PvrR	PvrR is a response regulator that controls the conversion between antibiotic-resistant and antibiotic-susceptible forms of Pseudomonas aeruginosa biofilms through porin deletion/gene absence	phenotypic variant regulator	aminoglycoside antibiotic	resistance by absence
CJQ_1_01377	555	34	542	91.71	36.18	APB03219.1	648	31	538	78.4	30.93	APB03219.1 ARO:3003986 TaeA [Paenibacillus sp. LC231]	357	1.13e-116	39.453	512	303	TaeA	Pleuromutilin (Tiamulin) ABC efflux pump found in Paenibacillus sp. LC231, a strain of Paenibacillus isolated from Lechuguilla Cave, NM, USA. Confers resistance to pleuromutilin antibiotics. Described by Pawlowski et al. 2016.	ATP-binding cassette (ABC) antibiotic efflux pump	pleuromutilin antibiotic	antibiotic efflux
CJQ_1_01377	555	323	530	37.48	12.08	APB03219.1	648	3	243	37.19	11.99	APB03219.1 ARO:3003986 TaeA [Paenibacillus sp. LC231]	124	0	32.245	245	125	TaeA	Pleuromutilin (Tiamulin) ABC efflux pump found in Paenibacillus sp. LC231, a strain of Paenibacillus isolated from Lechuguilla Cave, NM, USA. Confers resistance to pleuromutilin antibiotics. Described by Pawlowski et al. 2016.	ATP-binding cassette (ABC) antibiotic efflux pump	pleuromutilin antibiotic	antibiotic efflux
CJQ_1_01377	555	19	249	41.62	14.29	APB03219.1	648	331	528	30.56	10.49	APB03219.1 ARO:3003986 TaeA [Paenibacillus sp. LC231]	120	1.14e-29	34.335	233	116	TaeA	Pleuromutilin (Tiamulin) ABC efflux pump found in Paenibacillus sp. LC231, a strain of Paenibacillus isolated from Lechuguilla Cave, NM, USA. Confers resistance to pleuromutilin antibiotics. Described by Pawlowski et al. 2016.	ATP-binding cassette (ABC) antibiotic efflux pump	pleuromutilin antibiotic	antibiotic efflux
CJQ_1_01390	292	6	128	42.12	13.36	ALH22601.1	337	1	123	36.5	11.57	ALH22601.1 ARO:3000620 adeL [Acinetobacter baumannii]	57.8	2.26e-10	31.707	123	84	adeL	AdeL is a regulator of AdeFGH in Acinetobacter baumannii. AdeL mutations are associated with AdeFGH overexpression and multidrug resistance.	resistance-nodulation-cell division (RND) antibiotic efflux pump	fluoroquinolone antibiotic;tetracycline antibiotic	antibiotic efflux
CJQ_1_01391	1098	848	1093	22.4	7.01	AAM15533.1	399	151	392	60.65	18.98	AAM15533.1 ARO:3003688 PvrR [Pseudomonas aeruginosa]	108	0	31.301	246	165	PvrR	PvrR is a response regulator that controls the conversion between antibiotic-resistant and antibiotic-susceptible forms of Pseudomonas aeruginosa biofilms through porin deletion/gene absence	phenotypic variant regulator	aminoglycoside antibiotic	resistance by absence
CJQ_1_01400	332	220	328	32.83	9.64	AAC77032.1	107	4	107	97.2	28.53	AAC77032.1 ARO:3003511 Escherichia coli soxS with mutation conferring antibiotic resistance [Escherichia coli str. K-12 substr. MG1655]	50.1	7.32e-09	29.358	109	72	Escherichia coli soxS with mutation conferring antibiotic resistance	SoxS is a global regulator that up-regulates the expression of AcrAB efflux genes. It also reduces OmpF expression to decrease cell membrane permeability.	ATP-binding cassette (ABC) antibiotic efflux pump;General Bacterial Porin with reduced permeability to beta-lactams;major facilitator superfamily (MFS) antibiotic efflux pump;resistance-nodulation-cell division (RND) antibiotic efflux pump	carbapenem;cephalosporin;cephamycin;fluoroquinolone antibiotic;glycylcycline;monobactam;penam;penem;phenicol antibiotic;rifamycin antibiotic;tetracycline antibiotic;triclosan	antibiotic efflux;antibiotic target alteration;reduced permeability to antibiotic
CJQ_1_01421	633	17	337	50.71	14.1	CAA67349.1	397	4	310	77.33	21.51	CAA67349.1 ARO:3003359 Streptomyces cinnamoneus EF-Tu mutants conferring resistance to elfamycin [Streptomyces cinnamoneus]	87.4	2.64e-19	27.811	338	196	Streptomyces cinnamoneus EF-Tu mutants conferring resistance to elfamycin	Sequence variants of Streptomyces cinnamoneus elongation factor Tu that confer resistance to elfamycin antibiotics.	elfamycin resistant EF-Tu	elfamycin antibiotic	antibiotic target alteration
CJQ_1_01424	718	180	708	73.68	21.15	AAF67494.2	615	51	585	86.99	24.97	AAF67494.2 ARO:3002522 novA [Streptomyces niveus]	196	0	28.702	547	360	novA	A type III ABC transporter, identified on the novobiocin biosynthetic gene cluster, involved in the transport and resistance of novobiocin.	ATP-binding cassette (ABC) antibiotic efflux pump	aminocoumarin antibiotic	antibiotic efflux
CJQ_1_01426	648	397	648	38.89	9.8	AAM15533.1	399	129	384	64.16	16.16	AAM15533.1 ARO:3003688 PvrR [Pseudomonas aeruginosa]	57.8	1.07e-09	25.194	258	185	PvrR	PvrR is a response regulator that controls the conversion between antibiotic-resistant and antibiotic-susceptible forms of Pseudomonas aeruginosa biofilms through porin deletion/gene absence	phenotypic variant regulator	aminoglycoside antibiotic	resistance by absence
CJQ_1_01437	272	58	150	34.19	11.16	AJD73064.1	282	100	186	30.85	10.07	AJD73064.1 ARO:3001301 RlmA(II) [Streptococcus pneumoniae]	45.8	1.11e-06	32.632	95	54	RlmA(II)	RlmA(II) is a methyltransferase found in Streptococcus pneumoniae and confers resistance to mycinamicin, tylosin and lincosamides. Specifically, this enzyme adds a methyl group to guanosine 748 (E. coli numbering) of 23S ribosomal RNA.	non-erm 23S ribosomal RNA methyltransferase (G748)	lincosamide antibiotic;macrolide antibiotic	antibiotic target alteration
CJQ_1_01447	147	29	136	73.47	25.85	CDO13981.1	223	3	108	47.53	16.72	CDO13981.1 ARO:3003585 Klebsiella mutant PhoP conferring antibiotic resistance to colistin [Klebsiella pneumoniae]	54.3	1.62e-10	35.185	108	68	Klebsiella mutant PhoP conferring antibiotic resistance to colistin	A mutant phoP activates pmrHFIJKLM expression responsible for L-aminoarabinose synthesis and polymyxin resistance, by way of alteration of negative charge	ATP-binding cassette (ABC) antibiotic efflux pump;pmr phosphoethanolamine transferase	macrolide antibiotic;peptide antibiotic	antibiotic efflux;antibiotic target alteration
CJQ_1_01457	62	1	61	98.39	77.42	AAC16242.1	61	1	60	98.36	77.4	AAC16242.1 ARO:3005069 rsmA [Pseudomonas aeruginosa]	99	0	78.689	61	12	rsmA	rsmA is a gene that regulates virulence of Pseudomonas aeruginosa. However, its negative effect on MexEF-OprN overexpression has been noted to confer resistance to various antibiotics. It's Escherichia coli homolog is csrA.	resistance-nodulation-cell division (RND) antibiotic efflux pump	diaminopyrimidine antibiotic;fluoroquinolone antibiotic;phenicol antibiotic	antibiotic efflux
CJQ_1_01468	326	206	309	31.9	9.11	AAC77032.1	107	2	106	98.13	28.04	AAC77032.1 ARO:3003511 Escherichia coli soxS with mutation conferring antibiotic resistance [Escherichia coli str. K-12 substr. MG1655]	50.1	8.11e-09	28.571	105	74	Escherichia coli soxS with mutation conferring antibiotic resistance	SoxS is a global regulator that up-regulates the expression of AcrAB efflux genes. It also reduces OmpF expression to decrease cell membrane permeability.	ATP-binding cassette (ABC) antibiotic efflux pump;General Bacterial Porin with reduced permeability to beta-lactams;major facilitator superfamily (MFS) antibiotic efflux pump;resistance-nodulation-cell division (RND) antibiotic efflux pump	carbapenem;cephalosporin;cephamycin;fluoroquinolone antibiotic;glycylcycline;monobactam;penam;penem;phenicol antibiotic;rifamycin antibiotic;tetracycline antibiotic;triclosan	antibiotic efflux;antibiotic target alteration;reduced permeability to antibiotic
CJQ_1_01469	254	4	252	98.03	30.07	ADZ12699.1	258	2	240	92.64	28.42	ADZ12699.1 ARO:3005091 RanA [Riemerella anatipestifer RA-GD]	132	0	30.677	251	160	RanA	RanA is a part of the RanARanB ABC-type efflux system. Alongside RanB, it confers resistance to aminoglycoside antibiotics.	ATP-binding cassette (ABC) antibiotic efflux pump	aminoglycoside antibiotic	antibiotic efflux
CJQ_1_01475	519	210	514	58.77	20.16	AAK37618.1	318	26	316	91.51	31.39	AAK37618.1 ARO:3005008 Txr [Vibrio harveyi]	187	0	34.304	309	181	TxR	TxR is a putative transcription regulator that plays a role in conferring tetracycline resistance. It is required for proper functioning of Tet35.	ATP-binding cassette (ABC) antibiotic efflux pump	tetracycline antibiotic	antibiotic efflux
CJQ_1_01481	294	10	292	96.26	28.71	CAA79966.1	295	7	286	94.92	28.31	CAA79966.1 ARO:3003665 NmcR [Enterobacter cloacae]	119	0	29.825	285	193	NmcR	NmcR is a homolog of the LysR regulator found in Enterobacter cloacae that contribute to the regulation of NmcA beta-lactamase	NmcA beta-lactamase	carbapenem;cephalosporin;cephamycin;penam	antibiotic inactivation
CJQ_1_01492	225	1	224	99.56	80.89	SIP52035.1	225	1	224	99.56	80.89	SIP52035.1 ARO:3004054 Pseudomonas aeruginosa CpxR [Pseudomonas aeruginosa]	362	1.68e-129	81.25	224	42	Pseudomonas aeruginosa CpxR	CpxR is directly involved in activation of expression of RND efflux pump MexAB-OprM in P. aeruginosa. CpxR is required to enhance mexAB-oprM expression and drug resistance, in the absence of repressor MexR.	resistance-nodulation-cell division (RND) antibiotic efflux pump	aminocoumarin antibiotic;aminoglycoside antibiotic;carbapenem;cephalosporin;cephamycin;diaminopyrimidine antibiotic;fluoroquinolone antibiotic;macrolide antibiotic;monobactam;penam;penem;peptide antibiotic;phenicol antibiotic;sulfonamide antibiotic;tetracycline antibiotic	antibiotic efflux
CJQ_1_01494	443	156	442	64.79	21.59	BAB38260.1	457	170	457	63.02	21.01	BAB38260.1 ARO:3000830 cpxA [Escherichia coli O157:H7 str. Sakai]	132	0	33.333	294	183	cpxA	CpxA is a membrane-localized sensor kinase that is activated by envelope stress. It starts a kinase cascade that activates CpxR, which promotes efflux complex expression.	resistance-nodulation-cell division (RND) antibiotic efflux pump	aminocoumarin antibiotic;aminoglycoside antibiotic	antibiotic efflux
CJQ_1_01497	326	209	305	29.75	8.93	BAE77778.1	274	143	242	36.5	10.95	BAE77778.1 ARO:3000508 gadX [Escherichia coli str. K-12 substr. W3110]	51.6	1.91e-08	30	100	67	gadX	GadX is an AraC-family regulator that promotes mdtEF expression to confer multidrug resistance.	resistance-nodulation-cell division (RND) antibiotic efflux pump	fluoroquinolone antibiotic;macrolide antibiotic;penam	antibiotic efflux
CJQ_1_01506	452	22	432	90.93	21.56	WP_001985623.1	448	20	441	94.2	22.33	WP_001985623.1 ARO:3004578 Acinetobacter baumannii AbuO [Acinetobacter baumannii]	85.9	0	23.709	426	306	Acinetobacter baumannii AbuO	AbuO is akin to the TolC outer membrane efflux protein. Deletion in A. baumannii results in increased susceptibility to antibiotics including amikacin, carbenicillin, ceftriaxone, meropenem, streptomycin, and tigecycline as well as disinfectants benzyalkonium chloride and chlorhexidine.	resistance-nodulation-cell division (RND) antibiotic efflux pump	aminoglycoside antibiotic;benzalkonium chloride;carbapenem;cephalosporin;glycylcycline;penam;tetracycline antibiotic	antibiotic efflux
CJQ_1_01509	297	11	152	47.81	13.04	ALH22601.1	337	1	129	38.28	10.44	ALH22601.1 ARO:3000620 adeL [Acinetobacter baumannii]	44.3	4.99e-06	27.273	143	89	adeL	AdeL is a regulator of AdeFGH in Acinetobacter baumannii. AdeL mutations are associated with AdeFGH overexpression and multidrug resistance.	resistance-nodulation-cell division (RND) antibiotic efflux pump	fluoroquinolone antibiotic;tetracycline antibiotic	antibiotic efflux
CJQ_1_01529	257	8	242	91.44	27.12	ADZ12699.1	258	2	227	87.6	25.98	ADZ12699.1 ARO:3005091 RanA [Riemerella anatipestifer RA-GD]	128	0	29.661	236	155	RanA	RanA is a part of the RanARanB ABC-type efflux system. Alongside RanB, it confers resistance to aminoglycoside antibiotics.	ATP-binding cassette (ABC) antibiotic efflux pump	aminoglycoside antibiotic	antibiotic efflux
CJQ_1_01544	254	14	234	87.01	31.43	AAV85982.1	644	3	227	34.94	12.62	AAV85982.1 ARO:3000535 macB [Neisseria gonorrhoeae]	139	0	36.123	227	137	macB	MacB is an ATP-binding cassette (ABC) transporter that exports macrolides with 14- or 15- membered lactones. It forms an antibiotic efflux complex with MacA and TolC. macB corresponds to 1 locus in Pseudomonas aeruginosa PAO1 and 1 locus in Pseudomonas aeruginosa LESB58.	ATP-binding cassette (ABC) antibiotic efflux pump	macrolide antibiotic	antibiotic efflux
CJQ_1_01556	406	46	376	81.53	21.35	AAG07762.1	376	55	308	67.55	17.69	AAG07762.1 ARO:3003030 mexV [Pseudomonas aeruginosa PAO1]	50.4	1.22e-07	26.19	336	161	MexV	MexV is the membrane fusion protein of the MexVW-OprM multidrug efflux complex.	resistance-nodulation-cell division (RND) antibiotic efflux pump	acridine dye;disinfecting agents and intercalating dyes;fluoroquinolone antibiotic;macrolide antibiotic;phenicol antibiotic;tetracycline antibiotic	antibiotic efflux
CJQ_1_01558	389	26	386	92.8	25	AAV85982.1	644	268	641	58.07	15.65	AAV85982.1 ARO:3000535 macB [Neisseria gonorrhoeae]	117	0	26.943	386	245	macB	MacB is an ATP-binding cassette (ABC) transporter that exports macrolides with 14- or 15- membered lactones. It forms an antibiotic efflux complex with MacA and TolC. macB corresponds to 1 locus in Pseudomonas aeruginosa PAO1 and 1 locus in Pseudomonas aeruginosa LESB58.	ATP-binding cassette (ABC) antibiotic efflux pump	macrolide antibiotic	antibiotic efflux
CJQ_1_01559	221	3	218	97.74	39.1	AAV85982.1	644	2	220	34.01	13.6	AAV85982.1 ARO:3000535 macB [Neisseria gonorrhoeae]	164	2.99e-48	40	220	127	macB	MacB is an ATP-binding cassette (ABC) transporter that exports macrolides with 14- or 15- membered lactones. It forms an antibiotic efflux complex with MacA and TolC. macB corresponds to 1 locus in Pseudomonas aeruginosa PAO1 and 1 locus in Pseudomonas aeruginosa LESB58.	ATP-binding cassette (ABC) antibiotic efflux pump	macrolide antibiotic	antibiotic efflux
CJQ_1_01562	438	1	353	80.59	22.61	AAC75089.1	388	1	336	86.6	24.3	AAC75089.1 ARO:3003577 ugd [Escherichia coli str. K-12 substr. MG1655]	135	1.33e-36	28.056	360	228	ugd	PmrE is required for the synthesis and transfer of 4-amino-4-deoxy-L-arabinose (Ara4N) to Lipid A, which allows gram-negative bacteria to resist the antimicrobial activity of cationic antimicrobial peptides and antibiotics such as polymyxin	pmr phosphoethanolamine transferase	peptide antibiotic	antibiotic target alteration
CJQ_1_01575	270	5	182	65.93	19.88	AAC74177.1	244	9	197	77.46	23.36	AAC74177.1 ARO:3004049 antibiotic resistant fabG [Escherichia coli str. K-12 substr. MG1655]	71.6	1e-15	30.159	189	121	Escherichia coli fabG mutations conferring resistance to triclosan	fabG is a 3-oxoacyl-acyl carrier protein reductase involved in lipid metabolism and fatty acid biosynthesis.The bacterial biocide Triclosan blocks the final reduction step in fatty acid elongation, inhibiting biosynthesis. Point mutations in fabG can confer resistance to Triclosan.	antibiotic resistant fabG	triclosan	antibiotic target alteration
CJQ_1_01576	264	3	259	97.35	29.2	AAC74177.1	244	1	241	98.77	29.63	AAC74177.1 ARO:3004049 antibiotic resistant fabG [Escherichia coli str. K-12 substr. MG1655]	100	0	30	260	160	Escherichia coli fabG mutations conferring resistance to triclosan	fabG is a 3-oxoacyl-acyl carrier protein reductase involved in lipid metabolism and fatty acid biosynthesis.The bacterial biocide Triclosan blocks the final reduction step in fatty acid elongation, inhibiting biosynthesis. Point mutations in fabG can confer resistance to Triclosan.	antibiotic resistant fabG	triclosan	antibiotic target alteration
CJQ_1_01577	483	17	476	95.24	30.09	AAG05913.1	498	17	479	92.97	29.37	AAG05913.1 ARO:3004072 OpmB [Pseudomonas aeruginosa PAO1]	223	0	31.59	478	294	OpmB	OpmB is an outer membrane efflux protein in Pseudomonas aeruginosa that shows functional cooperation with MuxABC, to form the efflux pump system MuxABC-OpmB.	resistance-nodulation-cell division (RND) antibiotic efflux pump	aminocoumarin antibiotic;macrolide antibiotic;monobactam;tetracycline antibiotic	antibiotic efflux
CJQ_1_01578	353	32	340	87.54	31.34	AAF40763.1	384	45	345	78.39	28.06	AAF40763.1 ARO:3003961 farA [Neisseria meningitidis MC58]	143	2.39e-40	35.802	324	170	farA	farA is the membrane fusion protein that is part of the farAB efflux pump.	major facilitator superfamily (MFS) antibiotic efflux pump	antibacterial free fatty acids	antibiotic efflux
CJQ_1_01579	513	38	499	90.06	22.01	BAA11237.1	512	25	498	92.58	22.63	BAA11237.1 ARO:3000254 emrY [Escherichia coli]	105	0	24.44	491	325	emrY	emrY is a multidrug transport that moves substrates across the inner membrane of the Gram-negative E. coli. It is a homolog of emrB.	major facilitator superfamily (MFS) antibiotic efflux pump	tetracycline antibiotic	antibiotic efflux
CJQ_1_01586	384	4	241	61.98	17.78	ADZ12699.1	258	2	242	93.41	26.8	ADZ12699.1 ARO:3005091 RanA [Riemerella anatipestifer RA-GD]	117	0	28.689	244	165	RanA	RanA is a part of the RanARanB ABC-type efflux system. Alongside RanB, it confers resistance to aminoglycoside antibiotics.	ATP-binding cassette (ABC) antibiotic efflux pump	aminoglycoside antibiotic	antibiotic efflux
CJQ_1_01591	473	223	469	52.22	17.08	BAB38260.1	457	189	452	57.77	18.89	BAB38260.1 ARO:3000830 cpxA [Escherichia coli O157:H7 str. Sakai]	107	0	32.707	266	158	cpxA	CpxA is a membrane-localized sensor kinase that is activated by envelope stress. It starts a kinase cascade that activates CpxR, which promotes efflux complex expression.	resistance-nodulation-cell division (RND) antibiotic efflux pump	aminocoumarin antibiotic;aminoglycoside antibiotic	antibiotic efflux
CJQ_1_01592	241	8	231	92.95	39.07	SIP52035.1	225	4	221	96.89	40.73	SIP52035.1 ARO:3004054 Pseudomonas aeruginosa CpxR [Pseudomonas aeruginosa]	152	0	42.035	226	121	Pseudomonas aeruginosa CpxR	CpxR is directly involved in activation of expression of RND efflux pump MexAB-OprM in P. aeruginosa. CpxR is required to enhance mexAB-oprM expression and drug resistance, in the absence of repressor MexR.	resistance-nodulation-cell division (RND) antibiotic efflux pump	aminocoumarin antibiotic;aminoglycoside antibiotic;carbapenem;cephalosporin;cephamycin;diaminopyrimidine antibiotic;fluoroquinolone antibiotic;macrolide antibiotic;monobactam;penam;penem;peptide antibiotic;phenicol antibiotic;sulfonamide antibiotic;tetracycline antibiotic	antibiotic efflux
CJQ_1_01607	502	186	499	62.55	25.22	AAK37618.1	318	11	317	96.54	38.92	AAK37618.1 ARO:3005008 Txr [Vibrio harveyi]	236	0	40.312	320	172	TxR	TxR is a putative transcription regulator that plays a role in conferring tetracycline resistance. It is required for proper functioning of Tet35.	ATP-binding cassette (ABC) antibiotic efflux pump	tetracycline antibiotic	antibiotic efflux
CJQ_1_01620	287	55	228	60.63	19.99	ADZ12699.1	258	31	211	70.16	23.13	ADZ12699.1 ARO:3005091 RanA [Riemerella anatipestifer RA-GD]	97.8	0	32.973	185	109	RanA	RanA is a part of the RanARanB ABC-type efflux system. Alongside RanB, it confers resistance to aminoglycoside antibiotics.	ATP-binding cassette (ABC) antibiotic efflux pump	aminoglycoside antibiotic	antibiotic efflux
CJQ_1_01627	291	35	283	85.57	26.65	BAE78084.1	343	36	340	88.92	27.7	BAE78084.1 ARO:3003548 mdtN [Escherichia coli str. K-12 substr. W3110]	113	0	31.148	305	154	mdtN	Multidrug resistance efflux pump. Could be involved in resistance to puromycin, acriflavine and tetraphenylarsonium chloride.	major facilitator superfamily (MFS) antibiotic efflux pump	acridine dye;disinfecting agents and intercalating dyes;nucleoside antibiotic	antibiotic efflux
CJQ_1_01628	472	10	470	97.67	31.13	AAG05883.1	472	20	472	95.97	30.59	AAG05883.1 ARO:3000805 OprN [Pseudomonas aeruginosa PAO1]	189	9.6e-56	31.875	480	281	OprN	OprN is the outer membrane channel component of the MexEF-OprN multidrug efflux complex.	resistance-nodulation-cell division (RND) antibiotic efflux pump	diaminopyrimidine antibiotic;fluoroquinolone antibiotic;phenicol antibiotic	antibiotic efflux
CJQ_1_01636	242	3	221	90.5	26.09	AAC74177.1	244	1	222	90.98	26.23	AAC74177.1 ARO:3004049 antibiotic resistant fabG [Escherichia coli str. K-12 substr. MG1655]	91.3	0	28.829	222	155	Escherichia coli fabG mutations conferring resistance to triclosan	fabG is a 3-oxoacyl-acyl carrier protein reductase involved in lipid metabolism and fatty acid biosynthesis.The bacterial biocide Triclosan blocks the final reduction step in fatty acid elongation, inhibiting biosynthesis. Point mutations in fabG can confer resistance to Triclosan.	antibiotic resistant fabG	triclosan	antibiotic target alteration
CJQ_1_01682	581	277	560	48.88	13.12	AMR95642.1	756	434	731	39.42	10.58	AMR95642.1 ARO:3003805 Enterococcus faecalis gshF with mutation conferring daptomycin resistance [Enterococcus faecalis]	97.8	0	26.846	298	204	Enterococcus faecalis gshF with mutation conferring daptomycin resistance	gshF is a bifunctional glutamate-cysteine ligase/ glutathione synthetase that when mutated, confers daptomycin resistance.	daptomycin resistant gshF	peptide antibiotic	antibiotic target alteration
CJQ_1_01685	60	1	58	96.67	43.33	AAC16242.1	61	1	58	95.08	42.62	AAC16242.1 ARO:3005069 rsmA [Pseudomonas aeruginosa]	59.3	6e-15	44.828	58	32	rsmA	rsmA is a gene that regulates virulence of Pseudomonas aeruginosa. However, its negative effect on MexEF-OprN overexpression has been noted to confer resistance to various antibiotics. It's Escherichia coli homolog is csrA.	resistance-nodulation-cell division (RND) antibiotic efflux pump	diaminopyrimidine antibiotic;fluoroquinolone antibiotic;phenicol antibiotic	antibiotic efflux
CJQ_1_01686	269	6	187	67.66	20.7	AAC74177.1	244	9	188	73.77	22.57	AAC74177.1 ARO:3004049 antibiotic resistant fabG [Escherichia coli str. K-12 substr. MG1655]	94.7	0	30.601	183	123	Escherichia coli fabG mutations conferring resistance to triclosan	fabG is a 3-oxoacyl-acyl carrier protein reductase involved in lipid metabolism and fatty acid biosynthesis.The bacterial biocide Triclosan blocks the final reduction step in fatty acid elongation, inhibiting biosynthesis. Point mutations in fabG can confer resistance to Triclosan.	antibiotic resistant fabG	triclosan	antibiotic target alteration
CJQ_1_01709	329	4	224	67.17	22.49	ADZ12699.1	258	2	228	87.98	29.46	ADZ12699.1 ARO:3005091 RanA [Riemerella anatipestifer RA-GD]	136	0	33.48	227	145	RanA	RanA is a part of the RanARanB ABC-type efflux system. Alongside RanB, it confers resistance to aminoglycoside antibiotics.	ATP-binding cassette (ABC) antibiotic efflux pump	aminoglycoside antibiotic	antibiotic efflux
CJQ_1_01711	266	36	257	83.46	19.85	AAC75429.1	1197	304	520	18.13	4.31	AAC75429.1 ARO:3000833 evgS [Escherichia coli str. K-12 substr. MG1655]	49.3	1.53e-07	23.789	227	158	evgS	EvgS is a sensor protein that phosphorylates the regulatory protein EvgA. evgS corresponds to 1 locus in Pseudomonas aeruginosa PAO1 and 1 locus in Pseudomonas aeruginosa LESB58.	major facilitator superfamily (MFS) antibiotic efflux pump;resistance-nodulation-cell division (RND) antibiotic efflux pump	fluoroquinolone antibiotic;macrolide antibiotic;penam;tetracycline antibiotic	antibiotic efflux
CJQ_1_01713	244	1	237	97.13	33.73	AAV85982.1	644	3	239	36.8	12.78	AAV85982.1 ARO:3000535 macB [Neisseria gonorrhoeae]	140	0	34.728	239	152	macB	MacB is an ATP-binding cassette (ABC) transporter that exports macrolides with 14- or 15- membered lactones. It forms an antibiotic efflux complex with MacA and TolC. macB corresponds to 1 locus in Pseudomonas aeruginosa PAO1 and 1 locus in Pseudomonas aeruginosa LESB58.	ATP-binding cassette (ABC) antibiotic efflux pump	macrolide antibiotic	antibiotic efflux
CJQ_1_01724	256	61	187	49.61	14.33	AAL02176.1	341	181	307	37.24	10.76	AAL02176.1 ARO:3004669 emtA [Enterococcus faecium] Partial	49.3	9.06e-08	28.889	135	80	emtA	A rRNA methyltransferase conferring high-level evernimicin resistance	non-erm 23S ribosomal RNA methyltransferase (G748)	lincosamide antibiotic;macrolide antibiotic	antibiotic target alteration
CJQ_1_01729	204	2	55	26.47	11.27	AAC73566.1	215	11	64	25.12	10.7	AAC73566.1 ARO:3003807 Escherichia coli acrR with mutation conferring multidrug antibiotic resistance [Escherichia coli str. K-12 substr. MG1655]	48.9	3.94e-08	42.593	54	31	Escherichia coli acrR with mutation conferring multidrug antibiotic resistance	AcrR is a repressor of the AcrAB-TolC multidrug efflux complex. AcrR mutations result in high level antibiotic resistance. The mutations associated with this model are specific to E. coli.	resistance-nodulation-cell division (RND) antibiotic efflux pump	cephalosporin;fluoroquinolone antibiotic;glycylcycline;penam;phenicol antibiotic;rifamycin antibiotic;tetracycline antibiotic;triclosan	antibiotic efflux;antibiotic target alteration
CJQ_1_01743	133	6	120	86.47	25.56	ATC67679.1	219	3	114	51.14	15.12	ATC67679.1 ARO:3000838 arlR [Staphylococcus aureus subsp. aureus str. Newman]	72.8	0	29.565	115	78	arlR	ArlR is a response regulator that binds to the norA promoter to activate expression. ArlR must first be phosphorylated by ArlS.	major facilitator superfamily (MFS) antibiotic efflux pump	acridine dye;disinfecting agents and intercalating dyes;fluoroquinolone antibiotic	antibiotic efflux
CJQ_1_01744	121	2	116	95.04	33.06	BAE85478.1	232	3	114	48.28	16.79	BAE85478.1 ARO:3003728 vanRI [Desulfitobacterium hafniense Y51]	79	0	34.783	115	72	vanRI	VanRI is the regulatory transcriptional activator in the VanSR regulator within the VanI glycopeptide resistance gene cluster.	glycopeptide resistance gene cluster;vanR	glycopeptide antibiotic	antibiotic target alteration
CJQ_1_01747	1649	1526	1632	6.49	2.06	AAR84672.1	231	2	105	45.02	14.31	AAR84672.1 ARO:3002925 vanRF [Paenibacillus popilliae ATCC 14706]	78.2	1.17e-16	31.776	107	70	vanRF	vanRF is a vanR variant found in the vanF gene cluster	glycopeptide resistance gene cluster;vanR	glycopeptide antibiotic	antibiotic target alteration
CJQ_1_01760	435	21	365	79.31	23.73	CCP45240.1	487	43	411	75.77	22.67	CCP45240.1 ARO:3004157 Mycobacterium tuberculosis folC with mutation conferring resistance to para-aminosalicylic acid [Mycobacterium tuberculosis H37Rv]	111	0	29.921	381	219	Mycobacterium tuberculosis folC with mutation conferring resistance to para-aminosalicylic acid	Point mutations in the dihydrofolate synthetase folC gene shown clinically to confer resistance to p-aminosalicylic acid or other aminosalicylates. Mutations in folC inhibit bioactivation of PAS and thus confer resistance.	aminosalicylate resistant dihydrofolate synthase	para-aminosalicylic acid	antibiotic target alteration
CJQ_1_01765	256	12	249	92.97	29.05	AAC74177.1	244	5	241	97.13	30.35	AAC74177.1 ARO:3004049 antibiotic resistant fabG [Escherichia coli str. K-12 substr. MG1655]	116	0	31.25	240	160	Escherichia coli fabG mutations conferring resistance to triclosan	fabG is a 3-oxoacyl-acyl carrier protein reductase involved in lipid metabolism and fatty acid biosynthesis.The bacterial biocide Triclosan blocks the final reduction step in fatty acid elongation, inhibiting biosynthesis. Point mutations in fabG can confer resistance to Triclosan.	antibiotic resistant fabG	triclosan	antibiotic target alteration
CJQ_1_01776	297	8	122	38.72	12.46	ALH22601.1	337	1	115	34.12	10.98	ALH22601.1 ARO:3000620 adeL [Acinetobacter baumannii]	59.3	7.05e-11	32.174	115	78	adeL	AdeL is a regulator of AdeFGH in Acinetobacter baumannii. AdeL mutations are associated with AdeFGH overexpression and multidrug resistance.	resistance-nodulation-cell division (RND) antibiotic efflux pump	fluoroquinolone antibiotic;tetracycline antibiotic	antibiotic efflux
CJQ_1_01780	417	21	416	94.96	33.83	AAG04347.1	443	31	440	92.55	32.97	AAG04347.1 ARO:3003686 Pseudomonas aeruginosa oprD with mutation conferring resistance to imipenem [Pseudomonas aeruginosa PAO1]	241	3.33e-76	35.629	421	235	Pseudomonas aeruginosa oprD with mutation conferring resistance to imipenem	oprD is an outer membrane porin which facilitates the uptake of basic amino acids and imipenem in Pseudomonas aeruginosa.	Outer Membrane Porin (Opr)	carbapenem;cephalosporin;cephamycin;monobactam;penam;penem	reduced permeability to antibiotic
CJQ_1_01782	130	1	104	80	26.67	AAL19308.1	154	1	105	68.18	22.73	AAL19308.1 ARO:3000504 golS [Salmonella enterica subsp. enterica serovar Typhimurium str. LT2]	60.8	1.36e-13	33.333	105	69	golS	GolS is a regulator activated by the presence of golD, and promotes the expression of the MdsABC efflux pump.	resistance-nodulation-cell division (RND) antibiotic efflux pump	carbapenem;cephalosporin;cephamycin;monobactam;penam;penem;phenicol antibiotic	antibiotic efflux
CJQ_1_01809	402	30	397	91.54	21.95	AAD25063.1	384	15	384	96.35	23.11	AAD25063.1 ARO:3000183 tet(Z) [Corynebacterium glutamicum]	47.8	7.58e-07	23.98	392	252	tet(Z)	TetZ is a tetracycline efflux protein found in Gram-positive bacteria (Corynebacterium and Lactobacillus). It is associated with plasmid DNA.	major facilitator superfamily (MFS) antibiotic efflux pump	tetracycline antibiotic	antibiotic efflux
CJQ_1_01817	151	8	149	94.04	59.6	AAC77033.1	154	11	152	92.21	58.44	AAC77033.1 ARO:3003381 Escherichia coli soxR with mutation conferring antibiotic resistance [Escherichia coli str. K-12 substr. MG1655]	188	0	63.38	142	52	Escherichia coli soxR with mutation conferring antibiotic resistance	SoxR is a sensory protein that upregulates soxS expression in the presence of redox-cycling drugs. This stress response leads to the expression many multidrug efflux pumps.	ATP-binding cassette (ABC) antibiotic efflux pump;major facilitator superfamily (MFS) antibiotic efflux pump;resistance-nodulation-cell division (RND) antibiotic efflux pump	cephalosporin;fluoroquinolone antibiotic;glycylcycline;penam;phenicol antibiotic;rifamycin antibiotic;tetracycline antibiotic;triclosan	antibiotic efflux;antibiotic target alteration
CJQ_1_01819	504	23	490	92.86	26.64	AAC75733.1	512	24	493	91.8	26.34	AAC75733.1 ARO:3000074 emrB [Escherichia coli str. K-12 substr. MG1655]	210	1.05e-62	28.692	474	328	emrB	emrB is a translocase in the emrB -TolC efflux protein in E. coli. It recognizes substrates including carbonyl cyanide m-chlorophenylhydrazone (CCCP), nalidixic acid, and thioloactomycin.	major facilitator superfamily (MFS) antibiotic efflux pump	fluoroquinolone antibiotic	antibiotic efflux
CJQ_1_01820	381	54	379	85.56	29.56	BAA11236.1	351	8	311	86.61	29.92	BAA11236.1 ARO:3000206 emrK [Escherichia coli]	153	0	34.545	330	186	emrK	emrK is a membrane fusion protein that is a homolog of EmrA. Together with the inner membrane transporter EmrY and the outer membrane channel TolC, it mediates multidrug efflux.	major facilitator superfamily (MFS) antibiotic efflux pump	tetracycline antibiotic	antibiotic efflux
CJQ_1_01821	472	3	472	99.58	31.34	AAG05883.1	472	1	468	99.15	31.2	AAG05883.1 ARO:3000805 OprN [Pseudomonas aeruginosa PAO1]	168	0	31.47	483	303	OprN	OprN is the outer membrane channel component of the MexEF-OprN multidrug efflux complex.	resistance-nodulation-cell division (RND) antibiotic efflux pump	diaminopyrimidine antibiotic;fluoroquinolone antibiotic;phenicol antibiotic	antibiotic efflux
CJQ_1_01822	236	136	229	39.83	10.9	BAA15221.2	127	17	108	72.44	19.83	BAA15221.2 ARO:3000263 marA [Escherichia coli str. K-12 substr. W3110]	48.9	1.63e-08	27.368	95	65	marA	In the presence of antibiotic stress, E. coli overexpresses the global activator protein MarA, which besides inducing MDR efflux pump AcrAB, also down- regulates synthesis of the porin OmpF.	General Bacterial Porin with reduced permeability to beta-lactams;resistance-nodulation-cell division (RND) antibiotic efflux pump	carbapenem;cephalosporin;cephamycin;fluoroquinolone antibiotic;glycylcycline;monobactam;penam;penem;phenicol antibiotic;rifamycin antibiotic;tetracycline antibiotic;triclosan	antibiotic efflux;reduced permeability to antibiotic
CJQ_1_01824	273	176	262	31.87	10.14	AFK13828.1	124	25	112	70.97	22.58	AFK13828.1 ARO:3000823 ramA [Enterobacter cloacae]	43.5	1.6e-06	31.818	88	59	ramA	RamA (resistance antibiotic multiple) is a positive regulator of AcrAB-TolC and leads to high level multidrug resistance in Klebsiella pneumoniae, Salmonella enterica, and Enterobacter aerugenes, increasing the expression of both the mar operon as well as AcrAB. RamA also decreases OmpF expression.	General Bacterial Porin with reduced permeability to beta-lactams;resistance-nodulation-cell division (RND) antibiotic efflux pump	carbapenem;cephalosporin;cephamycin;fluoroquinolone antibiotic;glycylcycline;monobactam;penam;penem;phenicol antibiotic;rifamycin antibiotic;tetracycline antibiotic;triclosan	antibiotic efflux;reduced permeability to antibiotic
CJQ_1_01825	302	35	299	87.75	47.68	AAG05880.1	347	78	342	76.37	41.5	AAG05880.1 ARO:3000814 MexT [Pseudomonas aeruginosa PAO1]	285	0	54.34	265	121	MexT	MexT is a LysR-type transcriptional activator that positively regulates the expression of MexEF-OprN, OprD, and MexS.	resistance-nodulation-cell division (RND) antibiotic efflux pump	diaminopyrimidine antibiotic;fluoroquinolone antibiotic;phenicol antibiotic	antibiotic efflux
CJQ_1_01831	791	19	335	40.08	15.12	APB03222.1	884	19	314	33.48	12.64	APB03222.1 ARO:3003992 rphB [Paenibacillus sp. LC231]	189	5.14e-51	37.736	318	175	rphB	rphB is a rifampin phosphotransferase protein found in Paenibacillus sp. LC231, a strain of Paenibacillus isolated from Lechuguilla Cave, NM, USA. Confers resistance to rifamycin antibiotics, specifically rifampin, through rifampin inactivation. Described by Pawlowski et al. 2016.	rifampin phosphotransferase	rifamycin antibiotic	antibiotic inactivation
CJQ_1_01831	791	369	454	10.87	5.06	APB03222.1	884	794	878	9.62	4.47	APB03222.1 ARO:3003992 rphB [Paenibacillus sp. LC231]	83.2	0	46.512	86	45	rphB	rphB is a rifampin phosphotransferase protein found in Paenibacillus sp. LC231, a strain of Paenibacillus isolated from Lechuguilla Cave, NM, USA. Confers resistance to rifamycin antibiotics, specifically rifampin, through rifampin inactivation. Described by Pawlowski et al. 2016.	rifampin phosphotransferase	rifamycin antibiotic	antibiotic inactivation
CJQ_1_01838	345	233	341	31.59	10.27	CDO13836.1	374	245	363	31.82	10.34	CDO13836.1 ARO:3005044 OmpA [Klebsiella pneumoniae]	60.8	3.54e-11	32.5	120	69	OmpA	OmpA is a porin that confers resistance to beta-lactam antibiotics.	General Bacterial Porin with reduced permeability to beta-lactams	carbapenem;cephalosporin;cephamycin;monobactam;penam;penem	reduced permeability to antibiotic
CJQ_1_01846	730	539	688	20.55	6.04	APB03216.1	287	81	236	54.36	15.97	APB03216.1 ARO:3003982 LlmA 23S ribosomal RNA methyltransferase [Paenibacillus sp. LC231]	47.8	1.29e-06	29.375	160	99	LlmA 23S ribosomal RNA methyltransferase	Lincosamide (Clindamycin) resistant (putative) ribosomal methyltransferase related to the RlmK 23S rRNA methyltransferase COG family. Detected in Paenibacillus sp. LC231, an isolated strain of Paenibacillus found in Lechuguilla Cave, NM, USA. Described by Pawlowski et al. 2016.	Llm 23S ribosomal RNA methyltransferase	lincosamide antibiotic	antibiotic target alteration
CJQ_1_01850	1210	41	1166	93.06	27.17	AAC75429.1	1197	41	1159	93.48	27.29	AAC75429.1 ARO:3000833 evgS [Escherichia coli str. K-12 substr. MG1655]	453	0	29.192	1151	758	evgS	EvgS is a sensor protein that phosphorylates the regulatory protein EvgA. evgS corresponds to 1 locus in Pseudomonas aeruginosa PAO1 and 1 locus in Pseudomonas aeruginosa LESB58.	major facilitator superfamily (MFS) antibiotic efflux pump;resistance-nodulation-cell division (RND) antibiotic efflux pump	fluoroquinolone antibiotic;macrolide antibiotic;penam;tetracycline antibiotic	antibiotic efflux
CJQ_1_01851	205	6	204	97.07	34.63	BAB36671.1	204	5	203	97.55	34.8	BAB36671.1 ARO:3000832 evgA [Escherichia coli O157:H7 str. Sakai]	145	0	35.678	199	128	evgA	EvgA, when phosphorylated, is a positive regulator for efflux protein complexes emrKY and mdtEF. While usually phosphorylated in a EvgS dependent manner, it can be phosphorylated in the absence of EvgS when overexpressed.	major facilitator superfamily (MFS) antibiotic efflux pump;resistance-nodulation-cell division (RND) antibiotic efflux pump	fluoroquinolone antibiotic;macrolide antibiotic;penam;tetracycline antibiotic	antibiotic efflux
CJQ_1_01872	380	22	229	54.74	16.37	ADZ12699.1	258	1	214	82.95	24.81	ADZ12699.1 ARO:3005091 RanA [Riemerella anatipestifer RA-GD]	114	0	29.907	214	144	RanA	RanA is a part of the RanARanB ABC-type efflux system. Alongside RanB, it confers resistance to aminoglycoside antibiotics.	ATP-binding cassette (ABC) antibiotic efflux pump	aminoglycoside antibiotic	antibiotic efflux
CJQ_1_01876	253	3	249	97.63	36.36	AAC74177.1	244	1	240	98.36	36.64	AAC74177.1 ARO:3004049 antibiotic resistant fabG [Escherichia coli str. K-12 substr. MG1655]	134	0	37.247	247	148	Escherichia coli fabG mutations conferring resistance to triclosan	fabG is a 3-oxoacyl-acyl carrier protein reductase involved in lipid metabolism and fatty acid biosynthesis.The bacterial biocide Triclosan blocks the final reduction step in fatty acid elongation, inhibiting biosynthesis. Point mutations in fabG can confer resistance to Triclosan.	antibiotic resistant fabG	triclosan	antibiotic target alteration
CJQ_1_01877	333	26	225	60.06	17.31	ADT64081.1	339	19	224	60.77	17.52	ADT64081.1 ARO:3000813 MexS [Pseudomonas aeruginosa PAK]	53.9	4.74e-09	28.829	222	120	MexS	MexS is a suppressor of MexT, which is an activator of the multidrug pump MexEF-OprN. Mutations in MexS lead to multidrug resistance.	resistance-nodulation-cell division (RND) antibiotic efflux pump	diaminopyrimidine antibiotic;fluoroquinolone antibiotic;phenicol antibiotic	antibiotic efflux
CJQ_1_01888	331	233	327	28.7	9.06	AAL23089.1	107	13	107	88.79	28.04	AAL23089.1 ARO:3003383 Salmonella serovars soxS with mutation conferring antibiotic resistance [Salmonella enterica subsp. enterica serovar Typhimurium str. LT2]	45.8	2.6e-07	31.579	95	65	Salmonella serovars soxS with mutation conferring antibiotic resistance	SoxS is a global regulator that up-regulates the expression of AcrAB efflux genes. It also reduces OmpF expression to decrease cell membrane permeability.	ATP-binding cassette (ABC) antibiotic efflux pump;General Bacterial Porin with reduced permeability to beta-lactams;major facilitator superfamily (MFS) antibiotic efflux pump;resistance-nodulation-cell division (RND) antibiotic efflux pump	carbapenem;cephalosporin;cephamycin;fluoroquinolone antibiotic;glycylcycline;monobactam;penam;penem;phenicol antibiotic;rifamycin antibiotic;tetracycline antibiotic;triclosan	antibiotic efflux;antibiotic target alteration;reduced permeability to antibiotic
CJQ_1_01889	184	5	145	76.63	20.34	CCP44816.1	186	3	164	87.1	23.12	CCP44816.1 ARO:3003394 Mycobacterium tuberculosis pncA mutations conferring resistance to pyrazinamide [Mycobacterium tuberculosis H37Rv]	46.2	2.23e-07	26.543	162	98	Mycobacterium tuberculosis pncA mutations conferring resistance to pyrazinamide	pncA is a pyrazinamidase/nicotinamidase. It catalyzes the activation of pyrazinamide. Some mutation within pncA are associated with loss of enzyme activity, resulting in pyrazinamide resistance.	pyrazinamide resistant pncA	pyrazinamide	antibiotic target alteration
CJQ_1_01905	255	1	252	98.82	29.57	AAC74177.1	244	1	243	99.59	29.8	AAC74177.1 ARO:3004049 antibiotic resistant fabG [Escherichia coli str. K-12 substr. MG1655]	92.4	0	29.921	254	165	Escherichia coli fabG mutations conferring resistance to triclosan	fabG is a 3-oxoacyl-acyl carrier protein reductase involved in lipid metabolism and fatty acid biosynthesis.The bacterial biocide Triclosan blocks the final reduction step in fatty acid elongation, inhibiting biosynthesis. Point mutations in fabG can confer resistance to Triclosan.	antibiotic resistant fabG	triclosan	antibiotic target alteration
CJQ_1_01909	340	235	330	28.24	7.65	BAE77778.1	274	146	240	34.67	9.39	BAE77778.1 ARO:3000508 gadX [Escherichia coli str. K-12 substr. W3110]	44.7	4.68e-06	27.083	96	69	gadX	GadX is an AraC-family regulator that promotes mdtEF expression to confer multidrug resistance.	resistance-nodulation-cell division (RND) antibiotic efflux pump	fluoroquinolone antibiotic;macrolide antibiotic;penam	antibiotic efflux
CJQ_1_01934	298	10	296	96.31	32.1	CAA79966.1	295	8	290	95.93	31.98	CAA79966.1 ARO:3003665 NmcR [Enterobacter cloacae]	128	0	33.333	291	182	NmcR	NmcR is a homolog of the LysR regulator found in Enterobacter cloacae that contribute to the regulation of NmcA beta-lactamase	NmcA beta-lactamase	carbapenem;cephalosporin;cephamycin;penam	antibiotic inactivation
CJQ_1_01938	703	1	703	100	58.32	CAG39573	693	1	693	100	58.32	CAG39573 ARO:3003735 Staphylococcus mutant fusA gene conferring resistance to fusidic acid [Staphylococcus aureus subsp. aureus MRSA252]	813	0	58.321	703	283	Staphylococcus aureus fusA with mutation conferring resistance to fusidic acid	The mutations to this gene are involved in altering the translation elongation factor G (EF-G) in association with the ribosome to prevent fusidic acid from binding EF-G and preventing translation.	antibiotic resistant fusA	fusidic acid	antibiotic target alteration
CJQ_1_01944	305	19	302	93.11	20	ALH22601.1	337	1	286	84.87	18.23	ALH22601.1 ARO:3000620 adeL [Acinetobacter baumannii]	58.2	1.63e-10	21.477	298	208	adeL	AdeL is a regulator of AdeFGH in Acinetobacter baumannii. AdeL mutations are associated with AdeFGH overexpression and multidrug resistance.	resistance-nodulation-cell division (RND) antibiotic efflux pump	fluoroquinolone antibiotic;tetracycline antibiotic	antibiotic efflux
CJQ_1_01945	220	12	112	45.91	15.3	AAG07108.1	213	4	97	44.13	14.71	AAG07108.1 ARO:3000818 nalC [Pseudomonas aeruginosa PAO1]	48.9	4.02e-08	33.333	102	59	nalC	NalC is a repressor of PA3720-PA3719, which are positive regulators of MexAB-OprM. Thus, nalC mutants confer multidrug resistance.	resistance-nodulation-cell division (RND) antibiotic efflux pump	aminocoumarin antibiotic;carbapenem;cephalosporin;cephamycin;diaminopyrimidine antibiotic;fluoroquinolone antibiotic;macrolide antibiotic;monobactam;penam;penem;peptide antibiotic;phenicol antibiotic;sulfonamide antibiotic;tetracycline antibiotic	antibiotic efflux
CJQ_1_01947	228	3	187	81.14	20.5	AAC74177.1	244	4	188	75.82	19.15	AAC74177.1 ARO:3004049 antibiotic resistant fabG [Escherichia coli str. K-12 substr. MG1655]	50.8	1.43e-08	25.263	190	132	Escherichia coli fabG mutations conferring resistance to triclosan	fabG is a 3-oxoacyl-acyl carrier protein reductase involved in lipid metabolism and fatty acid biosynthesis.The bacterial biocide Triclosan blocks the final reduction step in fatty acid elongation, inhibiting biosynthesis. Point mutations in fabG can confer resistance to Triclosan.	antibiotic resistant fabG	triclosan	antibiotic target alteration
CJQ_1_01951	393	11	375	92.88	39.73	ALV80601.1	402	23	387	90.8	38.84	ALV80601.1 ARO:3003801 bcr-1 [Pseudomonas aeruginosa]	229	1.72e-72	42.779	367	206	bcr-1	Transmembrane protein which expels bicyclomycin from the cell, leading to bicyclomycin resistance. Identified in Pseudomonas aeruginosa strains responsible for outbreaks in Brazil, often appearing with blaSPM-1, another bicyclomycin resistance gene	major facilitator superfamily (MFS) antibiotic efflux pump	bicyclomycin	antibiotic efflux
CJQ_1_01955	136	1	126	92.65	51.47	AAL19308.1	154	1	126	81.82	45.45	AAL19308.1 ARO:3000504 golS [Salmonella enterica subsp. enterica serovar Typhimurium str. LT2]	146	0	55.556	126	56	golS	GolS is a regulator activated by the presence of golD, and promotes the expression of the MdsABC efflux pump.	resistance-nodulation-cell division (RND) antibiotic efflux pump	carbapenem;cephalosporin;cephamycin;monobactam;penam;penem;phenicol antibiotic	antibiotic efflux
CJQ_1_01959	450	213	448	52.44	20.47	AAC74177.1	244	5	243	97.95	38.22	AAC74177.1 ARO:3004049 antibiotic resistant fabG [Escherichia coli str. K-12 substr. MG1655]	144	0	39.024	246	133	Escherichia coli fabG mutations conferring resistance to triclosan	fabG is a 3-oxoacyl-acyl carrier protein reductase involved in lipid metabolism and fatty acid biosynthesis.The bacterial biocide Triclosan blocks the final reduction step in fatty acid elongation, inhibiting biosynthesis. Point mutations in fabG can confer resistance to Triclosan.	antibiotic resistant fabG	triclosan	antibiotic target alteration
CJQ_1_01966	258	9	126	45.74	14.34	AAF86641.1	231	4	116	48.92	15.34	AAF86641.1 ARO:3002922 vanRC [Enterococcus gallinarum]	65.5	1.21e-13	31.356	118	76	vanRC	vanRC is a vanR variant found in the vanC gene cluster	glycopeptide resistance gene cluster;vanR	glycopeptide antibiotic	antibiotic target alteration
CJQ_1_01967	784	81	437	45.54	12.84	AFC91828.1	719	84	463	52.85	14.9	AFC91828.1 ARO:3003041 Streptococcus pneumoniae PBP1a conferring resistance to amoxicillin [Streptococcus pneumoniae]	130	0	28.198	383	246	Streptococcus pneumoniae PBP1a conferring resistance to amoxicillin	PBP1a is a penicillin-binding protein found in Streptococcus pneumoniae	Penicillin-binding protein mutations conferring resistance to beta-lactam antibiotics	carbapenem;cephalosporin;cephamycin;monobactam;penam	antibiotic target alteration
CJQ_1_01970	445	16	315	67.42	15.88	ADO96486.1	464	15	318	65.52	15.43	ADO96486.1 ARO:3003953 hmrM [Haemophilus influenzae R2846]	55.8	3.27e-09	23.548	310	221	hmrM	hmrM is a multidrug efflux pump belonging to the MATE family and functions as a Na+/drug antiporter.	multidrug and toxic compound extrusion (MATE) transporter	acridine dye;disinfecting agents and intercalating dyes;fluoroquinolone antibiotic	antibiotic efflux
CJQ_1_01976	451	155	275	26.83	8.2	AAD51348.1	229	2	119	51.53	15.76	AAD51348.1 ARO:3003066 smeR [Stenotrophomonas maltophilia]	62.4	5.74e-12	30.579	121	81	smeR	smeR is the responder component of a two component signal transduction system that includes smeS	resistance-nodulation-cell division (RND) antibiotic efflux pump	aminoglycoside antibiotic;cephalosporin;cephamycin;penam	antibiotic efflux
CJQ_1_01982	617	332	610	45.22	18.24	AAK37618.1	318	43	316	86.16	34.76	AAK37618.1 ARO:3005008 Txr [Vibrio harveyi]	199	1.72e-59	40.345	290	146	TxR	TxR is a putative transcription regulator that plays a role in conferring tetracycline resistance. It is required for proper functioning of Tet35.	ATP-binding cassette (ABC) antibiotic efflux pump	tetracycline antibiotic	antibiotic efflux
CJQ_1_01993	666	327	662	50.45	16.77	AAK37618.1	318	17	316	94.34	31.35	AAK37618.1 ARO:3005008 Txr [Vibrio harveyi]	191	0	33.235	340	183	TxR	TxR is a putative transcription regulator that plays a role in conferring tetracycline resistance. It is required for proper functioning of Tet35.	ATP-binding cassette (ABC) antibiotic efflux pump	tetracycline antibiotic	antibiotic efflux
CJQ_1_01998	152	32	136	69.08	19.74	AAP26981.1	184	58	154	52.72	15.06	AAP26981.1 ARO:3005045 SatA [Bacillus anthracis str. Ames]	47	5.93e-08	28.571	105	67	SatA	SatA is part of the Streptothricin acetyltransferase gene family. It confers resistance to nucleoside antibiotics.	streptothricin acetyltransferase (SAT)	nucleoside antibiotic	antibiotic inactivation
CJQ_1_02018	376	154	347	51.6	15.84	CCP45469.1	258	40	236	76.36	23.44	CCP45469.1 ARO:3004184 Mycobacterium tuberculosis ribD with mutation conferring resistance to para-aminosalicylic acid [Mycobacterium tuberculosis H37Rv]	60.1	3.54e-11	30.693	202	127	Mycobacterium tuberculosis ribD with mutation conferring resistance to para-aminosalicylic acid	ribD is a Mycobacterium tuberculosis riboflavin biosynthesis enzyme. Point mutations in ribD cause enzyme overexpression, which allows the C-terminal reductase domain to act as an alternative dihydrofolate reductase. Thus, mutations in ribD confer resistance to DHFR inhibitors such as para-aminosalicylic acid.	aminosalicylate resistant dihydrofolate reductase	para-aminosalicylic acid	antibiotic target replacement
CJQ_1_02025	236	21	224	86.44	29.36	AAV85982.1	644	23	215	29.97	10.18	AAV85982.1 ARO:3000535 macB [Neisseria gonorrhoeae]	98.2	2.6e-24	33.962	212	113	macB	MacB is an ATP-binding cassette (ABC) transporter that exports macrolides with 14- or 15- membered lactones. It forms an antibiotic efflux complex with MacA and TolC. macB corresponds to 1 locus in Pseudomonas aeruginosa PAO1 and 1 locus in Pseudomonas aeruginosa LESB58.	ATP-binding cassette (ABC) antibiotic efflux pump	macrolide antibiotic	antibiotic efflux
CJQ_1_02026	421	279	418	33.25	8.31	AAV85982.1	644	508	642	20.96	5.24	AAV85982.1 ARO:3000535 macB [Neisseria gonorrhoeae]	49.3	4.04e-07	25	140	100	macB	MacB is an ATP-binding cassette (ABC) transporter that exports macrolides with 14- or 15- membered lactones. It forms an antibiotic efflux complex with MacA and TolC. macB corresponds to 1 locus in Pseudomonas aeruginosa PAO1 and 1 locus in Pseudomonas aeruginosa LESB58.	ATP-binding cassette (ABC) antibiotic efflux pump	macrolide antibiotic	antibiotic efflux
CJQ_1_02029	401	22	178	39.15	10.94	AAK99679.1	399	22	181	40.1	11.21	AAK99679.1 ARO:3000822 pmrA [Streptococcus pneumoniae R6]	54.7	4.53e-09	27.95	161	111	pmrA	PmrA is a MFS-type efflux pump expressed in Streptococcus pneumoniae that confers low-level resistance to norfloxacin, ciprofloxacin, and acriflavine.	major facilitator superfamily (MFS) antibiotic efflux pump	fluoroquinolone antibiotic	antibiotic efflux
CJQ_1_02031	310	6	253	80	22.81	AAG06942.1	662	320	578	39.12	11.16	AAG06942.1 ARO:3002985 arnA [Pseudomonas aeruginosa PAO1]	78.6	0	28.517	263	169	arnA	arnA modifies lipid A with 4-amino-4-deoxy-L-arabinose (Ara4N) which allows gram-negative bacteria to resist the antimicrobial activity of cationic antimicrobial peptides and antibiotics such as polymyxin. arnA is found in E. coli and P. aeruginosa.	pmr phosphoethanolamine transferase	peptide antibiotic	antibiotic target alteration
CJQ_1_02037	654	15	368	54.13	16	CAA67349.1	397	13	393	95.97	28.37	CAA67349.1 ARO:3003359 Streptomyces cinnamoneus EF-Tu mutants conferring resistance to elfamycin [Streptomyces cinnamoneus]	121	1.17e-30	29.563	389	231	Streptomyces cinnamoneus EF-Tu mutants conferring resistance to elfamycin	Sequence variants of Streptomyces cinnamoneus elongation factor Tu that confer resistance to elfamycin antibiotics.	elfamycin resistant EF-Tu	elfamycin antibiotic	antibiotic target alteration
CJQ_1_02044	309	18	303	92.56	29.18	ALH22601.1	337	1	287	85.16	26.85	ALH22601.1 ARO:3000620 adeL [Acinetobacter baumannii]	125	0	31.525	295	185	adeL	AdeL is a regulator of AdeFGH in Acinetobacter baumannii. AdeL mutations are associated with AdeFGH overexpression and multidrug resistance.	resistance-nodulation-cell division (RND) antibiotic efflux pump	fluoroquinolone antibiotic;tetracycline antibiotic	antibiotic efflux
CJQ_1_02046	408	19	404	94.61	23.94	AAC60780.1	563	22	394	66.25	16.76	AAC60780.1 ARO:3003049 rosB [Yersinia enterocolitica (type O:8)]	45.1	7.82e-06	25.304	411	244	rosB	rosB is part of an efflux pump/potassium antiporter system (RosAB) in Yersinia that confers resistance to cationic antimicrobial peptides such as polymyxin B.	major facilitator superfamily (MFS) antibiotic efflux pump	peptide antibiotic	antibiotic efflux
CJQ_1_02052	253	2	234	92.09	28.94	AAC74177.1	244	6	237	95.08	29.88	AAC74177.1 ARO:3004049 antibiotic resistant fabG [Escherichia coli str. K-12 substr. MG1655]	106	0	31.429	245	143	Escherichia coli fabG mutations conferring resistance to triclosan	fabG is a 3-oxoacyl-acyl carrier protein reductase involved in lipid metabolism and fatty acid biosynthesis.The bacterial biocide Triclosan blocks the final reduction step in fatty acid elongation, inhibiting biosynthesis. Point mutations in fabG can confer resistance to Triclosan.	antibiotic resistant fabG	triclosan	antibiotic target alteration
CJQ_1_02056	464	20	460	95.04	28.28	AAD08227.1	443	8	440	97.74	29.08	AAD08227.1 ARO:3003964 hp1181 [Helicobacter pylori 26695]	151	8.12e-42	29.754	447	294	hp1181	hp1181 is a translocase that is part of the MFS efflux pump family. It is found in H. pylori and has role in the active efflux of antibiotics.	major facilitator superfamily (MFS) antibiotic efflux pump	fluoroquinolone antibiotic;nitroimidazole antibiotic;tetracycline antibiotic	antibiotic efflux
CJQ_1_02057	944	806	903	10.38	3.28	AAV85982.1	644	122	215	14.6	4.62	AAV85982.1 ARO:3000535 macB [Neisseria gonorrhoeae]	53.5	6.02e-08	31.633	98	63	macB	MacB is an ATP-binding cassette (ABC) transporter that exports macrolides with 14- or 15- membered lactones. It forms an antibiotic efflux complex with MacA and TolC. macB corresponds to 1 locus in Pseudomonas aeruginosa PAO1 and 1 locus in Pseudomonas aeruginosa LESB58.	ATP-binding cassette (ABC) antibiotic efflux pump	macrolide antibiotic	antibiotic efflux
CJQ_1_02071	177	1	175	98.87	46.33	ADL24064.1	178	1	175	98.31	46.07	ADL24064.1 ARO:3003737 Staphylococcus mutant fusE gene conferring resistance to fusidic acid [Staphylococcus aureus subsp. aureus JKD6159]	161	0	46.857	175	93	Staphylococcus aureus fusE with mutation conferring resistance to fusidic acid	The mutations to the rplF gene encoding riboprotein L6 have been shown to cause fusidic acid resistance, demonstrating a potential secondary site of action of the antibiotic that is blocked through these mutations. Several types of mutations have been identified that cause resistance, including SNPs, frameshift mutations and early stop codons.	antibiotic resistant fusE	fusidic acid	antibiotic target alteration
CJQ_1_02085	200	1	197	98.5	46.58	YP_208871	206	1	203	98.54	46.6	YP_208871 ARO:3004956 rpld [Neisseria gonorrhoeae FA 1090] Partial	198	0	47.291	203	101	Neisseria gonorrhoeae rpld	rpld encodes for the 50S L4 ribosomal protein, is a macrolide resistance protein identified in Neisseria gonorrhoeae.	50S rRNA with mutation conferring resistance to macrolide antibiotics	glycopeptide antibiotic;macrolide antibiotic	antibiotic target alteration
CJQ_1_02086	211	4	209	97.63	53.3	AAS81670.1	206	3	204	98.06	53.53	AAS81670.1 ARO:3005081 Thermus thermophilus uL3 mutations conferring resistance to pleuromutilin antibiotics [Thermus thermophilus HB27]	201	1.31e-66	54.589	207	88	Thermus thermophilus uL3 mutations conferring resistance to pleuromutilin antibiotics	Thermus thermophilus ribosomal protein uL3 containing various mutations conferring resistance to tiamulin. Mutations in the ribosomal protein of uL3 acts by interfering with local rRNA conformation thus conferring resistance.	Ribosomal protein mutation conferring resistance to pleuromutilin antibiotics	pleuromutilin antibiotic	antibiotic target alteration
CJQ_1_02087	103	1	102	99.03	70.87	AAW90462.1	103	1	102	99.03	70.87	AAW90462.1 ARO:3003930 rpsJ [Neisseria gonorrhoeae FA 1090]	150	0	71.569	102	29	rpsJ	rpsJ is a tetracycline resistance protein identified in Neisseria gonorrhoeae. Tetracycline resistance is conferred by binding to the ribosome as a 30S ribosomal protection protein.	tetracycline-resistant ribosomal protection protein	tetracycline antibiotic	antibiotic target protection
CJQ_1_02091	345	1	221	64.06	22.46	AAV85982.1	644	1	227	35.25	12.36	AAV85982.1 ARO:3000535 macB [Neisseria gonorrhoeae]	125	0	35.065	231	136	macB	MacB is an ATP-binding cassette (ABC) transporter that exports macrolides with 14- or 15- membered lactones. It forms an antibiotic efflux complex with MacA and TolC. macB corresponds to 1 locus in Pseudomonas aeruginosa PAO1 and 1 locus in Pseudomonas aeruginosa LESB58.	ATP-binding cassette (ABC) antibiotic efflux pump	macrolide antibiotic	antibiotic efflux
CJQ_1_02098	766	644	745	13.32	5.38	AAG08162.1	221	2	101	45.25	18.27	AAG08162.1 ARO:3003582 basR [Pseudomonas aeruginosa PAO1]	65.9	6.69e-13	40.385	104	56	basR	Response regulator for Lipid A modification genes; two-component system involved in polymyxin resistance that senses high extracellular Fe(2+)	pmr phosphoethanolamine transferase	peptide antibiotic	antibiotic efflux;antibiotic target alteration
CJQ_1_02099	337	1	80	23.74	8.5	AAO82599.1	210	2	82	38.57	13.81	AAO82599.1 ARO:3003792 Enterococcus faecalis liaR mutant conferring daptomycin resistance [Enterococcus faecalis V583]	53.1	4.43e-09	35.802	81	51	Enterococcus faecalis liaR mutant conferring daptomycin resistance	liaR is a response regulator found in the liaFSR signal transduction pathway. Mutations confer daptomycin resistance.	daptomycin resistant liaR	peptide antibiotic	antibiotic efflux;antibiotic target alteration
CJQ_1_02100	334	1	165	49.4	15.29	BAA15935.1	240	1	145	60.42	18.7	BAA15935.1 ARO:3000828 baeR [Escherichia coli str. K-12 substr. W3110]	63.2	1.91e-12	30.952	168	90	baeR	BaeR is a response regulator that promotes the expression of MdtABC and AcrD efflux complexes.	resistance-nodulation-cell division (RND) antibiotic efflux pump	aminocoumarin antibiotic;aminoglycoside antibiotic	antibiotic efflux
CJQ_1_02103	238	27	138	47.06	13.56	AAC73566.1	215	3	120	54.88	15.81	AAC73566.1 ARO:3003807 Escherichia coli acrR with mutation conferring multidrug antibiotic resistance [Escherichia coli str. K-12 substr. MG1655]	48.1	1.14e-07	28.814	118	78	Escherichia coli acrR with mutation conferring multidrug antibiotic resistance	AcrR is a repressor of the AcrAB-TolC multidrug efflux complex. AcrR mutations result in high level antibiotic resistance. The mutations associated with this model are specific to E. coli.	resistance-nodulation-cell division (RND) antibiotic efflux pump	cephalosporin;fluoroquinolone antibiotic;glycylcycline;penam;phenicol antibiotic;rifamycin antibiotic;tetracycline antibiotic;triclosan	antibiotic efflux;antibiotic target alteration
CJQ_1_02108	263	143	255	42.97	16.5	CDO13836.1	374	248	372	33.42	12.83	CDO13836.1 ARO:3005044 OmpA [Klebsiella pneumoniae]	73.2	9.71e-16	38.4	125	65	OmpA	OmpA is a porin that confers resistance to beta-lactam antibiotics.	General Bacterial Porin with reduced permeability to beta-lactams	carbapenem;cephalosporin;cephamycin;monobactam;penam;penem	reduced permeability to antibiotic
CJQ_1_02120	213	7	211	96.24	57.28	AAG07066.1	212	4	208	96.7	57.55	AAG07066.1 ARO:3003710 mexL [Pseudomonas aeruginosa PAO1]	234	0	59.512	205	83	MexL	MexL is a specific repressor of mexJK transcription and autoregulates its own expression.	resistance-nodulation-cell division (RND) antibiotic efflux pump	macrolide antibiotic;tetracycline antibiotic;triclosan	antibiotic efflux
CJQ_1_02121	366	1	366	100	66.76	AAG07065.1	367	1	367	100	66.76	AAG07065.1 ARO:3003692 mexJ [Pseudomonas aeruginosa PAO1]	454	0	66.757	367	121	MexJ	mexJ is the membrane fusion protein of the MexJK multidrug efflux protein.	resistance-nodulation-cell division (RND) antibiotic efflux pump	macrolide antibiotic;tetracycline antibiotic;triclosan	antibiotic efflux
CJQ_1_02122	1018	1	1017	99.9	82.08	AAG07064.1	1025	1	1020	99.51	81.76	AAG07064.1 ARO:3003693 mexK [Pseudomonas aeruginosa PAO1]	1696	0	82.157	1020	179	MexK	mexK is the inner membrane resistance-nodulation-cell division (RND) transporter in the MexJK multidrug efflux protein.	resistance-nodulation-cell division (RND) antibiotic efflux pump	macrolide antibiotic;tetracycline antibiotic;triclosan	antibiotic efflux
CJQ_1_02130	270	2	259	95.56	31.61	AJD73064.1	282	18	272	90.43	29.91	AJD73064.1 ARO:3001301 RlmA(II) [Streptococcus pneumoniae]	153	0	33.08	263	163	RlmA(II)	RlmA(II) is a methyltransferase found in Streptococcus pneumoniae and confers resistance to mycinamicin, tylosin and lincosamides. Specifically, this enzyme adds a methyl group to guanosine 748 (E. coli numbering) of 23S ribosomal RNA.	non-erm 23S ribosomal RNA methyltransferase (G748)	lincosamide antibiotic;macrolide antibiotic	antibiotic target alteration
CJQ_1_02149	465	1	462	99.35	61.65	AAG03816.1	485	1	468	96.49	59.87	AAG03816.1 ARO:3000379 OprM [Pseudomonas aeruginosa PAO1]	538	0	62.047	469	170	OprM	OprM is an outer membrane factor protein found in Pseudomonas aeruginosa and Burkholderia vietnamiensis. It is part of the MexAB-OprM, MexVW-OprM, MexXY-OprM and the AmrAB-OprM complex.	resistance-nodulation-cell division (RND) antibiotic efflux pump	acridine dye;aminocoumarin antibiotic;aminoglycoside antibiotic;carbapenem;cephalosporin;cephamycin;diaminopyrimidine antibiotic;disinfecting agents and intercalating dyes;fluoroquinolone antibiotic;macrolide antibiotic;monobactam;penam;penem;peptide antibiotic;phenicol antibiotic;sulfonamide antibiotic;tetracycline antibiotic	antibiotic efflux
CJQ_1_02152	289	6	120	39.79	11.9	ALH22601.1	337	1	117	34.72	10.39	ALH22601.1 ARO:3000620 adeL [Acinetobacter baumannii]	48.9	1.68e-07	29.915	117	80	adeL	AdeL is a regulator of AdeFGH in Acinetobacter baumannii. AdeL mutations are associated with AdeFGH overexpression and multidrug resistance.	resistance-nodulation-cell division (RND) antibiotic efflux pump	fluoroquinolone antibiotic;tetracycline antibiotic	antibiotic efflux
CJQ_1_02155	299	195	290	32.11	9.7	AFK13828.1	124	18	112	76.61	23.14	AFK13828.1 ARO:3000823 ramA [Enterobacter cloacae]	44.7	8.54e-07	30.208	96	66	ramA	RamA (resistance antibiotic multiple) is a positive regulator of AcrAB-TolC and leads to high level multidrug resistance in Klebsiella pneumoniae, Salmonella enterica, and Enterobacter aerugenes, increasing the expression of both the mar operon as well as AcrAB. RamA also decreases OmpF expression.	General Bacterial Porin with reduced permeability to beta-lactams;resistance-nodulation-cell division (RND) antibiotic efflux pump	carbapenem;cephalosporin;cephamycin;fluoroquinolone antibiotic;glycylcycline;monobactam;penam;penem;phenicol antibiotic;rifamycin antibiotic;tetracycline antibiotic;triclosan	antibiotic efflux;reduced permeability to antibiotic
CJQ_1_02160	313	13	304	93.29	24.65	CAA79966.1	295	10	291	95.59	25.26	CAA79966.1 ARO:3003665 NmcR [Enterobacter cloacae]	110	0	26.421	299	196	NmcR	NmcR is a homolog of the LysR regulator found in Enterobacter cloacae that contribute to the regulation of NmcA beta-lactamase	NmcA beta-lactamase	carbapenem;cephalosporin;cephamycin;penam	antibiotic inactivation
CJQ_1_02169	205	90	149	29.27	12.86	ACX92987.1	216	100	165	30.56	13.43	ACX92987.1 ARO:3002845 vatH [Enterococcus faecium]	52.4	2.27e-09	43.939	66	31	vatH	vatH is a plasmid-mediated acetyltransferase found in Enterococcus faecium	streptogramin vat acetyltransferase	streptogramin antibiotic	antibiotic inactivation
CJQ_1_02183	308	34	291	83.77	26.49	AAG05880.1	347	80	338	74.64	23.6	AAG05880.1 ARO:3000814 MexT [Pseudomonas aeruginosa PAO1]	111	2.83e-29	31.618	272	159	MexT	MexT is a LysR-type transcriptional activator that positively regulates the expression of MexEF-OprN, OprD, and MexS.	resistance-nodulation-cell division (RND) antibiotic efflux pump	diaminopyrimidine antibiotic;fluoroquinolone antibiotic;phenicol antibiotic	antibiotic efflux
CJQ_1_02192	274	170	266	35.4	12.28	AAC77032.1	107	11	104	87.85	30.48	AAC77032.1 ARO:3003511 Escherichia coli soxS with mutation conferring antibiotic resistance [Escherichia coli str. K-12 substr. MG1655]	50.1	6.89e-09	34.694	98	59	Escherichia coli soxS with mutation conferring antibiotic resistance	SoxS is a global regulator that up-regulates the expression of AcrAB efflux genes. It also reduces OmpF expression to decrease cell membrane permeability.	ATP-binding cassette (ABC) antibiotic efflux pump;General Bacterial Porin with reduced permeability to beta-lactams;major facilitator superfamily (MFS) antibiotic efflux pump;resistance-nodulation-cell division (RND) antibiotic efflux pump	carbapenem;cephalosporin;cephamycin;fluoroquinolone antibiotic;glycylcycline;monobactam;penam;penem;phenicol antibiotic;rifamycin antibiotic;tetracycline antibiotic;triclosan	antibiotic efflux;antibiotic target alteration;reduced permeability to antibiotic
CJQ_1_02214	549	22	546	95.63	30.98	AAC75271.1	547	22	541	95.06	30.79	AAC75271.1 ARO:3003952 yojI [Escherichia coli str. K-12 substr. MG1655]	269	4.69e-84	32.392	531	342	YojI	YojI mediates resistance to the peptide antibiotic microcin J25 when it is expressed from a multicopy vector. YojI is capable of pumping out microcin molecules. The outer membrane protein TolC in addition to YojI is required for export of microcin J25 out of the cell. Microcin J25 is thus the first known substrate for YojI.	ATP-binding cassette (ABC) antibiotic efflux pump	peptide antibiotic	antibiotic efflux
CJQ_1_02217	545	47	538	90.28	36.37	AUN87920.1	541	48	538	90.76	36.56	AUN87920.1 ARO:3004500 MCR-3.11 [Escherichia coli]	432	0	40.283	494	290	MCR-3.11	An MCR-3 phosphoethanolamine transferase and polymyxin resistance gene variant differing by 2 amino acid substitutions, identified from an Escherichia coli isolate.	MCR phosphoethanolamine transferase	peptide antibiotic	antibiotic target alteration
CJQ_1_02220	310	97	278	58.71	17.7	AAB05626.1	323	108	298	59.13	17.83	AAB05626.1 ARO:3002943 vanHB [Enterococcus faecalis]	65.5	6.21e-13	30.151	199	114	vanHB	vanHB is a vanH variant in the vanB gene cluster	glycopeptide resistance gene cluster;vanH	glycopeptide antibiotic	antibiotic target alteration
CJQ_1_02227	442	79	169	20.59	7.38	AAQ10694.1	514	79	170	17.9	6.42	AAQ10694.1 ARO:3003047 qacB [Staphylococcus aureus]	46.6	2.55e-06	35.87	92	58	qacB	qacB is a subunit of the qac multidrug efflux pump	major facilitator superfamily (MFS) antibiotic efflux pump	fluoroquinolone antibiotic	antibiotic efflux
CJQ_1_02239	285	158	250	32.63	10.18	AAG06942.1	662	70	158	13.44	4.19	AAG06942.1 ARO:3002985 arnA [Pseudomonas aeruginosa PAO1]	44.7	4.86e-06	31.183	93	60	arnA	arnA modifies lipid A with 4-amino-4-deoxy-L-arabinose (Ara4N) which allows gram-negative bacteria to resist the antimicrobial activity of cationic antimicrobial peptides and antibiotics such as polymyxin. arnA is found in E. coli and P. aeruginosa.	pmr phosphoethanolamine transferase	peptide antibiotic	antibiotic target alteration
CJQ_1_02250	311	9	304	95.18	28.84	ALH22601.1	337	1	296	87.83	26.62	ALH22601.1 ARO:3000620 adeL [Acinetobacter baumannii]	127	0	30.303	297	205	adeL	AdeL is a regulator of AdeFGH in Acinetobacter baumannii. AdeL mutations are associated with AdeFGH overexpression and multidrug resistance.	resistance-nodulation-cell division (RND) antibiotic efflux pump	fluoroquinolone antibiotic;tetracycline antibiotic	antibiotic efflux
CJQ_1_02251	249	5	247	97.59	40.07	AAC74177.1	244	1	241	98.77	40.55	AAC74177.1 ARO:3004049 antibiotic resistant fabG [Escherichia coli str. K-12 substr. MG1655]	145	0	41.057	246	137	Escherichia coli fabG mutations conferring resistance to triclosan	fabG is a 3-oxoacyl-acyl carrier protein reductase involved in lipid metabolism and fatty acid biosynthesis.The bacterial biocide Triclosan blocks the final reduction step in fatty acid elongation, inhibiting biosynthesis. Point mutations in fabG can confer resistance to Triclosan.	antibiotic resistant fabG	triclosan	antibiotic target alteration
CJQ_1_02252	397	92	215	31.23	8.66	AAK99679.1	399	95	228	33.58	9.32	AAK99679.1 ARO:3000822 pmrA [Streptococcus pneumoniae R6]	49.7	1.96e-07	27.737	137	83	pmrA	PmrA is a MFS-type efflux pump expressed in Streptococcus pneumoniae that confers low-level resistance to norfloxacin, ciprofloxacin, and acriflavine.	major facilitator superfamily (MFS) antibiotic efflux pump	fluoroquinolone antibiotic	antibiotic efflux
CJQ_1_02263	116	1	81	69.83	40.87	AAA26683.1	219	119	200	37.44	21.92	AAA26683.1 ARO:3002840 vatA [Staphylococcus aureus]	99	0	58.537	82	33	vatA	vatA is a plasmid-mediated acetyltransferase found in Staphylococcus aureus	streptogramin vat acetyltransferase	streptogramin antibiotic	antibiotic inactivation
CJQ_1_02269	166	67	151	51.2	20.14	CDO13836.1	374	251	337	23.26	9.15	CDO13836.1 ARO:3005044 OmpA [Klebsiella pneumoniae]	55.5	1.81e-10	39.326	89	48	OmpA	OmpA is a porin that confers resistance to beta-lactam antibiotics.	General Bacterial Porin with reduced permeability to beta-lactams	carbapenem;cephalosporin;cephamycin;monobactam;penam;penem	reduced permeability to antibiotic
CJQ_1_02286	427	1	427	100	49.78	AAG04347.1	443	1	443	100	49.78	AAG04347.1 ARO:3003686 Pseudomonas aeruginosa oprD with mutation conferring resistance to imipenem [Pseudomonas aeruginosa PAO1]	387	2.96e-133	49.783	460	181	Pseudomonas aeruginosa oprD with mutation conferring resistance to imipenem	oprD is an outer membrane porin which facilitates the uptake of basic amino acids and imipenem in Pseudomonas aeruginosa.	Outer Membrane Porin (Opr)	carbapenem;cephalosporin;cephamycin;monobactam;penam;penem	reduced permeability to antibiotic
CJQ_1_02293	880	120	880	86.48	33.39	Q8FW76	880	123	880	86.14	33.26	Q8FW76 ARO:3003772 Brucella suis mprF [Brucella suis]	482	5.38e-158	38.61	777	442	Brucella suis mprF	MprF is a integral membrane protein that modifies the negatively-charged phosphatidylglycerol on the membrane surface. This confers resistance to cationic peptides that disrupt the cell membrane, including defensins.	defensin resistant mprF	peptide antibiotic	antibiotic target alteration
CJQ_1_02319	503	6	473	93.04	30.44	ACQ82816.1	492	2	473	95.93	31.38	ACQ82816.1 ARO:3004577 Acinetobacter baumannii AmvA [Acinetobacter baumannii]	263	0	32.712	483	299	Acinetobacter baumannii AmvA	AmvA has 14 alpha-helical transmembrane segments, qualifying it as a member of the DHA2 transporter family of the major facilitator superfamily (MFS). When AmvA was expressed in E. coli, the cells had at least four-fold decreased susceptibility to erythromycin, acridine orange, acriflavine, deoxycholate and methyl viologen. AmvA from the AC0037 strain of A. baumannii was tested.	major facilitator superfamily (MFS) antibiotic efflux pump	acridine dye;disinfecting agents and intercalating dyes;macrolide antibiotic	antibiotic efflux
CJQ_1_02324	382	13	236	58.64	20.05	AAV85982.1	644	2	228	35.25	12.05	AAV85982.1 ARO:3000535 macB [Neisseria gonorrhoeae]	136	0	34.188	234	137	macB	MacB is an ATP-binding cassette (ABC) transporter that exports macrolides with 14- or 15- membered lactones. It forms an antibiotic efflux complex with MacA and TolC. macB corresponds to 1 locus in Pseudomonas aeruginosa PAO1 and 1 locus in Pseudomonas aeruginosa LESB58.	ATP-binding cassette (ABC) antibiotic efflux pump	macrolide antibiotic	antibiotic efflux
CJQ_1_02332	294	7	289	96.26	36.56	ALH22601.1	337	1	287	85.16	32.34	ALH22601.1 ARO:3000620 adeL [Acinetobacter baumannii]	192	2.28e-60	37.979	287	174	adeL	AdeL is a regulator of AdeFGH in Acinetobacter baumannii. AdeL mutations are associated with AdeFGH overexpression and multidrug resistance.	resistance-nodulation-cell division (RND) antibiotic efflux pump	fluoroquinolone antibiotic;tetracycline antibiotic	antibiotic efflux
CJQ_1_02340	248	29	201	69.76	22.49	AAC32027.1	551	20	225	37.39	12.05	AAC32027.1 ARO:3002817 carA [Streptomyces thermotolerans]	87.8	0	32.243	214	96	carA	carA is an ABC-F subfamily protein involved in macrolide resistance. It is found in Streptomyces thermotolerans	ABC-F ATP-binding cassette ribosomal protection protein	lincosamide antibiotic;macrolide antibiotic;oxazolidinone antibiotic;phenicol antibiotic;pleuromutilin antibiotic;streptogramin antibiotic;tetracycline antibiotic	antibiotic target protection
CJQ_1_02358	102	3	101	97.06	52.34	NP_253005.1	124	20	120	81.45	43.92	NP_253005.1 ARO:3004069 MvaT [Pseudomonas aeruginosa PAO1]	102	1.52e-30	53.922	102	43	MvaT	MvaT, a global regulator of virulence genes in P. aeruginosa, has also shown to be able to repress the expression of the MexEF-OprN pump.	resistance-nodulation-cell division (RND) antibiotic efflux pump	diaminopyrimidine antibiotic;fluoroquinolone antibiotic;phenicol antibiotic	antibiotic efflux
CJQ_1_02359	429	25	429	94.41	33.29	AAG04347.1	443	31	443	93.23	32.88	AAG04347.1 ARO:3003686 Pseudomonas aeruginosa oprD with mutation conferring resistance to imipenem [Pseudomonas aeruginosa PAO1]	234	2.9e-73	35.267	431	235	Pseudomonas aeruginosa oprD with mutation conferring resistance to imipenem	oprD is an outer membrane porin which facilitates the uptake of basic amino acids and imipenem in Pseudomonas aeruginosa.	Outer Membrane Porin (Opr)	carbapenem;cephalosporin;cephamycin;monobactam;penam;penem	reduced permeability to antibiotic
CJQ_1_02361	116	1	113	97.41	33.28	CDO13981.1	223	1	116	52.02	17.77	CDO13981.1 ARO:3003585 Klebsiella mutant PhoP conferring antibiotic resistance to colistin [Klebsiella pneumoniae]	46.2	6.25e-08	34.167	120	68	Klebsiella mutant PhoP conferring antibiotic resistance to colistin	A mutant phoP activates pmrHFIJKLM expression responsible for L-aminoarabinose synthesis and polymyxin resistance, by way of alteration of negative charge	ATP-binding cassette (ABC) antibiotic efflux pump;pmr phosphoethanolamine transferase	macrolide antibiotic;peptide antibiotic	antibiotic efflux;antibiotic target alteration
CJQ_1_02363	1149	459	881	36.81	10.12	AAC75429.1	1197	693	1086	32.92	9.05	AAC75429.1 ARO:3000833 evgS [Escherichia coli str. K-12 substr. MG1655]	146	0	27.483	433	265	evgS	EvgS is a sensor protein that phosphorylates the regulatory protein EvgA. evgS corresponds to 1 locus in Pseudomonas aeruginosa PAO1 and 1 locus in Pseudomonas aeruginosa LESB58.	major facilitator superfamily (MFS) antibiotic efflux pump;resistance-nodulation-cell division (RND) antibiotic efflux pump	fluoroquinolone antibiotic;macrolide antibiotic;penam;tetracycline antibiotic	antibiotic efflux
CJQ_1_02363	1149	1023	1149	11.05	3.89	AAC75429.1	1197	957	1076	10.03	3.52	AAC75429.1 ARO:3000833 evgS [Escherichia coli str. K-12 substr. MG1655]	63.5	7.72e-11	35.156	128	74	evgS	EvgS is a sensor protein that phosphorylates the regulatory protein EvgA. evgS corresponds to 1 locus in Pseudomonas aeruginosa PAO1 and 1 locus in Pseudomonas aeruginosa LESB58.	major facilitator superfamily (MFS) antibiotic efflux pump;resistance-nodulation-cell division (RND) antibiotic efflux pump	fluoroquinolone antibiotic;macrolide antibiotic;penam;tetracycline antibiotic	antibiotic efflux
CJQ_1_02366	408	160	404	60.05	18.01	CAG39047	608	367	606	39.47	11.84	CAG39047 ARO:3003794 Staphylococcus aureus walK with mutation conferring daptomycin resistance [Staphylococcus aureus subsp. aureus MRSA252]	106	1.13e-25	30	250	160	Staphylococcus aureus walK with mutation conferring resistance to daptomycin	walK is the histidine kinase sensor of a two-component regulatory system controlling peptidoglycan metabolism through regulation of the expression of most of the peptidoglycan hydrolase genes. Mutations in the gene have been found that confer daptomycin resistance.	daptomycin resistant walK	peptide antibiotic	antibiotic target alteration
CJQ_1_02367	125	1	125	100	32.54	ADM92605.1	247	6	128	49.8	16.2	ADM92605.1 ARO:3000553 adeR [Acinetobacter baumannii]	54.3	9.46e-11	32.54	126	81	adeR	AdeR is a positive regulator of AdeABC efflux system. AdeR inactivation leads to susceptibility to aminoglycoside antibiotics.	resistance-nodulation-cell division (RND) antibiotic efflux pump	glycylcycline;tetracycline antibiotic	antibiotic efflux
CJQ_1_02368	193	20	86	34.72	11.92	ACF30254.1	210	19	84	31.43	10.79	ACF30254.1 ARO:3004851 Neisseria gonorrhoea mtrR with mutation conferring resistance [Neisseria gonorrhoeae NCCP11945] Partial	43.9	1.99e-06	34.328	67	43	Neisseria gonorrhoeae mtrR with mutation conferring resistance	MtrR is a repressor of mtrCDE efflux pump expression, point mutations in mtrR increase multidrug resistance.	resistance-nodulation-cell division (RND) antibiotic efflux pump	macrolide antibiotic	antibiotic efflux
CJQ_1_02371	336	247	336	26.79	8.33	BAE77778.1	274	158	246	32.48	10.11	BAE77778.1 ARO:3000508 gadX [Escherichia coli str. K-12 substr. W3110]	48.5	2.18e-07	31.111	90	61	gadX	GadX is an AraC-family regulator that promotes mdtEF expression to confer multidrug resistance.	resistance-nodulation-cell division (RND) antibiotic efflux pump	fluoroquinolone antibiotic;macrolide antibiotic;penam	antibiotic efflux
CJQ_1_02382	631	2	608	96.2	26	AAF40852.1	581	9	561	95.18	25.72	AAF40852.1 ARO:3003937 Neisseria meningititis PBP2 conferring resistance to beta-lactam [Neisseria meningitidis MC58]	165	0	27.027	629	361	Neisseria meningititis PBP2 conferring resistance to beta-lactam	Point mutation in Neisseria meningititis PBP2 (penA) decreases affinity between beta-lactam antibiotic molecule and PBP2, thereby conferring resistance to beta-lactam.	Penicillin-binding protein mutations conferring resistance to beta-lactam antibiotics	carbapenem;cephalosporin;cephamycin;monobactam;penam	antibiotic target alteration
CJQ_1_02383	445	45	187	32.13	11.49	ALV80601.1	402	41	187	36.57	13.08	ALV80601.1 ARO:3003801 bcr-1 [Pseudomonas aeruginosa]	52	4.33e-08	35.762	151	85	bcr-1	Transmembrane protein which expels bicyclomycin from the cell, leading to bicyclomycin resistance. Identified in Pseudomonas aeruginosa strains responsible for outbreaks in Brazil, often appearing with blaSPM-1, another bicyclomycin resistance gene	major facilitator superfamily (MFS) antibiotic efflux pump	bicyclomycin	antibiotic efflux
CJQ_1_02387	222	1	218	98.2	37.32	AAV85982.1	644	3	222	34.16	12.98	AAV85982.1 ARO:3000535 macB [Neisseria gonorrhoeae]	145	0	38.009	221	133	macB	MacB is an ATP-binding cassette (ABC) transporter that exports macrolides with 14- or 15- membered lactones. It forms an antibiotic efflux complex with MacA and TolC. macB corresponds to 1 locus in Pseudomonas aeruginosa PAO1 and 1 locus in Pseudomonas aeruginosa LESB58.	ATP-binding cassette (ABC) antibiotic efflux pump	macrolide antibiotic	antibiotic efflux
CJQ_1_02393	255	7	255	97.65	31.26	AAC74177.1	244	5	244	98.36	31.49	AAC74177.1 ARO:3004049 antibiotic resistant fabG [Escherichia coli str. K-12 substr. MG1655]	118	0	32.016	253	155	Escherichia coli fabG mutations conferring resistance to triclosan	fabG is a 3-oxoacyl-acyl carrier protein reductase involved in lipid metabolism and fatty acid biosynthesis.The bacterial biocide Triclosan blocks the final reduction step in fatty acid elongation, inhibiting biosynthesis. Point mutations in fabG can confer resistance to Triclosan.	antibiotic resistant fabG	triclosan	antibiotic target alteration
CJQ_1_02394	290	3	79	26.55	10.55	CAA79966.1	295	7	84	26.44	10.51	CAA79966.1 ARO:3003665 NmcR [Enterobacter cloacae]	48.1	2.44e-07	39.744	78	46	NmcR	NmcR is a homolog of the LysR regulator found in Enterobacter cloacae that contribute to the regulation of NmcA beta-lactamase	NmcA beta-lactamase	carbapenem;cephalosporin;cephamycin;penam	antibiotic inactivation
CJQ_1_02398	696	445	690	35.34	12.36	AAM15533.1	399	151	395	61.4	21.47	AAM15533.1 ARO:3003688 PvrR [Pseudomonas aeruginosa]	130	0	34.959	246	159	PvrR	PvrR is a response regulator that controls the conversion between antibiotic-resistant and antibiotic-susceptible forms of Pseudomonas aeruginosa biofilms through porin deletion/gene absence	phenotypic variant regulator	aminoglycoside antibiotic	resistance by absence
CJQ_1_02411	301	7	290	94.35	31.56	ALH22601.1	337	1	282	83.68	27.99	ALH22601.1 ARO:3000620 adeL [Acinetobacter baumannii]	141	1.89e-40	33.449	287	183	adeL	AdeL is a regulator of AdeFGH in Acinetobacter baumannii. AdeL mutations are associated with AdeFGH overexpression and multidrug resistance.	resistance-nodulation-cell division (RND) antibiotic efflux pump	fluoroquinolone antibiotic;tetracycline antibiotic	antibiotic efflux
CJQ_1_02412	400	9	370	90.5	22.68	CAD70268.1	475	12	430	88.21	22.1	CAD70268.1 ARO:3002704 fexA [Staphylococcus lentus]	48.1	6.08e-07	25.059	427	247	fexA	fexA is a plasmid-encoded chloramphenicol exporter that is found in Staphylococcus lentus	major facilitator superfamily (MFS) antibiotic efflux pump	phenicol antibiotic	antibiotic efflux
CJQ_1_02421	146	6	131	86.3	29.9	ACC85616.1	141	2	114	80.14	27.77	ACC85616.1 ARO:3002804 FosA2 [Enterobacter cloacae]	52.4	2.61e-10	34.646	127	68	FosA2	An enzyme that confers resistance to fosfomycin in Enterobacter cloacae by breaking the epoxide ring of the molecule. It depends on the cofactors Manganese (II) and Potassium and uses Glutathione (GSH) as the nucleophilic molecule.	fosfomycin thiol transferase	fosfomycin	antibiotic inactivation
CJQ_1_02424	304	9	126	38.82	10.53	ALH22601.1	337	1	117	34.72	9.42	ALH22601.1 ARO:3000620 adeL [Acinetobacter baumannii]	48.1	3.06e-07	27.119	118	85	adeL	AdeL is a regulator of AdeFGH in Acinetobacter baumannii. AdeL mutations are associated with AdeFGH overexpression and multidrug resistance.	resistance-nodulation-cell division (RND) antibiotic efflux pump	fluoroquinolone antibiotic;tetracycline antibiotic	antibiotic efflux
CJQ_1_02457	616	359	603	39.77	19	AAC74000.1	582	340	581	41.58	19.86	AAC74000.1 ARO:3003950 msbA [Escherichia coli str. K-12 substr. MG1655]	229	3.36e-68	47.773	247	122	msbA	MsbA is a multidrug resistance transporter homolog from E. coli and belongs to a superfamily of transporters that contain an adenosine triphosphate (ATP) binding cassette (ABC) which is also called a nucleotide-binding domain (NBD). MsbA is a member of the MDR-ABC transporter group by sequence homology. MsbA transports lipid A, a major component of the bacterial outer cell membrane, and is the on…	ATP-binding cassette (ABC) antibiotic efflux pump	nitroimidazole antibiotic	antibiotic efflux
CJQ_1_02459	297	11	188	59.93	24.04	CAA79966.1	295	7	185	60.68	24.34	CAA79966.1 ARO:3003665 NmcR [Enterobacter cloacae]	124	0	40.11	182	102	NmcR	NmcR is a homolog of the LysR regulator found in Enterobacter cloacae that contribute to the regulation of NmcA beta-lactamase	NmcA beta-lactamase	carbapenem;cephalosporin;cephamycin;penam	antibiotic inactivation
CJQ_1_02463	191	1	57	29.84	10.76	AAG05408.1	210	1	61	29.05	10.48	AAG05408.1 ARO:3003709 mexZ [Pseudomonas aeruginosa PAO1]	42	6.76e-06	36.066	61	35	MexZ	MexZ is a transcriptional regulator that downregulates the mexXY multidrug transporter operon, which confers to aminoglycoside resistance on Pseudomonas aeruginosa.	resistance-nodulation-cell division (RND) antibiotic efflux pump	acridine dye;aminoglycoside antibiotic;carbapenem;cephalosporin;cephamycin;disinfecting agents and intercalating dyes;fluoroquinolone antibiotic;macrolide antibiotic;penam;phenicol antibiotic;tetracycline antibiotic	antibiotic efflux
CJQ_1_02465	295	9	120	37.97	15.93	CAA79966.1	295	13	122	37.29	15.65	CAA79966.1 ARO:3003665 NmcR [Enterobacter cloacae]	69.3	1.8e-14	41.964	112	63	NmcR	NmcR is a homolog of the LysR regulator found in Enterobacter cloacae that contribute to the regulation of NmcA beta-lactamase	NmcA beta-lactamase	carbapenem;cephalosporin;cephamycin;penam	antibiotic inactivation
CJQ_1_02470	160	70	146	48.12	16.64	AAA26549.1	146	52	132	55.48	19.18	AAA26549.1 ARO:3002549 AAC(6')-Ic [Serratia marcescens]	46.2	7.51e-08	34.568	81	49	AAC(6')-Ic	AAC(6')-Ic is a chromosomal-encoded aminoglycoside acetyltransferase in S. marcescens	AAC(6')	aminoglycoside antibiotic	antibiotic inactivation
CJQ_1_02483	410	23	196	42.44	13.58	CCP45647.1	530	63	237	33.02	10.57	CCP45647.1 ARO:3003955 efpA [Mycobacterium tuberculosis H37Rv]	54.3	8.1e-09	32	175	118	efpA	efpA is an MFS transporter found in Mycobacterium tuberculosis.	major facilitator superfamily (MFS) antibiotic efflux pump	isoniazid;rifamycin antibiotic	antibiotic efflux
CJQ_1_02492	156	22	153	84.62	23.36	BAB56495.1	139	1	134	96.4	26.62	BAB56495.1 ARO:3000746 mepR [Staphylococcus aureus subsp. aureus Mu50]	46.2	6.21e-08	27.612	134	95	mepR	MepR is an upstream repressor of MepA in Staphylococcus aureus. It is part of the mepRAB operon.	multidrug and toxic compound extrusion (MATE) transporter	glycylcycline;tetracycline antibiotic	antibiotic efflux
CJQ_1_02501	435	4	423	96.55	69.03	ACJ41547.2	434	4	424	97	69.35	ACJ41547.2 ARO:3004574 Acinetobacter baumannii AbaQ [Acinetobacter baumannii AB0057]	610	0	71.496	421	119	Acinetobacter baumannii AbaQ	AbaQ is an MFS transporter mainly involved in the extrusion of quinolone-type drugs in A. baumannii	major facilitator superfamily (MFS) antibiotic efflux pump	fluoroquinolone antibiotic	antibiotic efflux
CJQ_1_02534	517	23	226	39.46	11.71	AAV85982.1	644	22	223	31.37	9.3	AAV85982.1 ARO:3000535 macB [Neisseria gonorrhoeae]	81.3	0	29.665	209	135	macB	MacB is an ATP-binding cassette (ABC) transporter that exports macrolides with 14- or 15- membered lactones. It forms an antibiotic efflux complex with MacA and TolC. macB corresponds to 1 locus in Pseudomonas aeruginosa PAO1 and 1 locus in Pseudomonas aeruginosa LESB58.	ATP-binding cassette (ABC) antibiotic efflux pump	macrolide antibiotic	antibiotic efflux
CJQ_1_02534	517	268	460	37.33	10.01	AAV85982.1	644	18	202	28.73	7.7	AAV85982.1 ARO:3000535 macB [Neisseria gonorrhoeae]	55.8	4.43e-09	26.804	194	132	macB	MacB is an ATP-binding cassette (ABC) transporter that exports macrolides with 14- or 15- membered lactones. It forms an antibiotic efflux complex with MacA and TolC. macB corresponds to 1 locus in Pseudomonas aeruginosa PAO1 and 1 locus in Pseudomonas aeruginosa LESB58.	ATP-binding cassette (ABC) antibiotic efflux pump	macrolide antibiotic	antibiotic efflux
CJQ_1_02538	306	8	275	87.58	23.94	CAA79966.1	295	7	268	88.81	24.28	CAA79966.1 ARO:3003665 NmcR [Enterobacter cloacae]	85.1	0	27.338	278	176	NmcR	NmcR is a homolog of the LysR regulator found in Enterobacter cloacae that contribute to the regulation of NmcA beta-lactamase	NmcA beta-lactamase	carbapenem;cephalosporin;cephamycin;penam	antibiotic inactivation
CJQ_1_02545	277	166	271	38.27	10.73	BAA15221.2	127	2	108	84.25	23.62	BAA15221.2 ARO:3000263 marA [Escherichia coli str. K-12 substr. W3110]	50.8	4.93e-09	28.037	107	76	marA	In the presence of antibiotic stress, E. coli overexpresses the global activator protein MarA, which besides inducing MDR efflux pump AcrAB, also down- regulates synthesis of the porin OmpF.	General Bacterial Porin with reduced permeability to beta-lactams;resistance-nodulation-cell division (RND) antibiotic efflux pump	carbapenem;cephalosporin;cephamycin;fluoroquinolone antibiotic;glycylcycline;monobactam;penam;penem;phenicol antibiotic;rifamycin antibiotic;tetracycline antibiotic;triclosan	antibiotic efflux;reduced permeability to antibiotic
CJQ_1_02567	752	518	743	30.05	9.46	CAG39047	608	368	597	37.83	11.91	CAG39047 ARO:3003794 Staphylococcus aureus walK with mutation conferring daptomycin resistance [Staphylococcus aureus subsp. aureus MRSA252]	102	0	31.489	235	147	Staphylococcus aureus walK with mutation conferring resistance to daptomycin	walK is the histidine kinase sensor of a two-component regulatory system controlling peptidoglycan metabolism through regulation of the expression of most of the peptidoglycan hydrolase genes. Mutations in the gene have been found that confer daptomycin resistance.	daptomycin resistant walK	peptide antibiotic	antibiotic target alteration
CJQ_1_02568	153	5	127	80.39	26.8	AAD51348.1	229	11	119	47.6	15.87	AAD51348.1 ARO:3003066 smeR [Stenotrophomonas maltophilia]	63.5	7.5e-14	33.333	123	68	smeR	smeR is the responder component of a two component signal transduction system that includes smeS	resistance-nodulation-cell division (RND) antibiotic efflux pump	aminoglycoside antibiotic;cephalosporin;cephamycin;penam	antibiotic efflux
CJQ_1_02569	799	587	790	25.53	7.43	AAC75429.1	1197	865	1073	17.46	5.08	AAC75429.1 ARO:3000833 evgS [Escherichia coli str. K-12 substr. MG1655]	73.9	3.5e-14	29.108	213	138	evgS	EvgS is a sensor protein that phosphorylates the regulatory protein EvgA. evgS corresponds to 1 locus in Pseudomonas aeruginosa PAO1 and 1 locus in Pseudomonas aeruginosa LESB58.	major facilitator superfamily (MFS) antibiotic efflux pump;resistance-nodulation-cell division (RND) antibiotic efflux pump	fluoroquinolone antibiotic;macrolide antibiotic;penam;tetracycline antibiotic	antibiotic efflux
CJQ_1_02576	438	189	427	54.57	20.21	AAG04569.1	448	198	438	53.79	19.92	AAG04569.1 ARO:3003896 Pseudomonas mutant PhoQ conferring resistance to colistin [Pseudomonas aeruginosa PAO1]	120	0	37.037	243	147	Pseudomonas mutant PhoQ conferring resistance to colistin	Mutations in Pseudomonas aeruginosa PhoQ of the two-component PhoPQ regulatory system. Presence of mutation confers resistance to colistin	ATP-binding cassette (ABC) antibiotic efflux pump;pmr phosphoethanolamine transferase	macrolide antibiotic;peptide antibiotic	antibiotic efflux;antibiotic target alteration
CJQ_1_02577	222	1	218	98.2	45.56	AAG04568.1	225	1	221	98.22	45.57	AAG04568.1 ARO:3003895 Pseudomonas mutant PhoP conferring resistance to colistin [Pseudomonas aeruginosa PAO1]	187	0	46.396	222	114	Pseudomonas mutant PhoP conferring resistance to colistin	Mutations in Pseudomonas aeruginosa PhoP of the two-component PhoPQ regulatory system. Presence of mutation confers resistance to colistin.	ATP-binding cassette (ABC) antibiotic efflux pump;pmr phosphoethanolamine transferase	macrolide antibiotic;peptide antibiotic	antibiotic efflux;antibiotic target alteration
CJQ_1_02668	324	11	155	44.75	12.53	CAA79966.1	295	14	160	49.83	13.95	CAA79966.1 ARO:3003665 NmcR [Enterobacter cloacae]	49.7	9.03e-08	28	150	100	NmcR	NmcR is a homolog of the LysR regulator found in Enterobacter cloacae that contribute to the regulation of NmcA beta-lactamase	NmcA beta-lactamase	carbapenem;cephalosporin;cephamycin;penam	antibiotic inactivation
CJQ_1_02677	227	4	223	96.92	37.11	AAV85982.1	644	2	222	34.32	13.14	AAV85982.1 ARO:3000535 macB [Neisseria gonorrhoeae]	154	0	38.288	222	134	macB	MacB is an ATP-binding cassette (ABC) transporter that exports macrolides with 14- or 15- membered lactones. It forms an antibiotic efflux complex with MacA and TolC. macB corresponds to 1 locus in Pseudomonas aeruginosa PAO1 and 1 locus in Pseudomonas aeruginosa LESB58.	ATP-binding cassette (ABC) antibiotic efflux pump	macrolide antibiotic	antibiotic efflux
CJQ_1_02710	602	358	573	35.88	9.62	AET10445.1	578	303	533	39.97	10.71	AET10445.1 ARO:3004033 tetB(46) [Streptococcus australis]	74.7	6e-15	26.809	235	149	tetB(46)	tetB(46) is a subunit of tetAB(46), a heterodimeric ABC transporter, that is required for conferring tetracycline resistance in Streptococcus australis isolated from the oral cavity.	ATP-binding cassette (ABC) antibiotic efflux pump	tetracycline antibiotic	antibiotic efflux
CJQ_1_02719	271	138	258	44.65	19.49	AQA08261.1	267	138	260	46.07	20.11	AQA08261.1 ARO:3004097 Streptococcus mitis CdsA with mutation conferring daptomycin resistance [Streptococcus oralis]	101	2.45e-26	43.651	126	63	Streptococcus mitis CdsA with mutation conferring daptomycin resistance	CdsA is a phosphatidate cytidylyltransferase which plays a role in the production of membrane phosphatidylglycerol and cardiolipin.	daptomycin resistant CdsA	peptide antibiotic	antibiotic target alteration
CJQ_1_02724	347	119	292	50.14	13.93	AJF82049.1	262	11	180	64.89	18.02	AJF82049.1 ARO:3003573 LpxA [Acinetobacter baumannii]	60.1	2.86e-11	27.778	180	114	LpxA	The LpxA gene is widely known to be involved in the biosynthesis of lipid A in Gram-negative bacteria and mutations to this gene may cause resistance to antimicrobial peptides that target the outer membrane	Acinetobacter mutant Lpx gene conferring resistance to colistin	peptide antibiotic	antibiotic target alteration
CJQ_1_02726	258	4	258	98.84	47.87	AJF82049.1	262	7	262	97.71	47.33	AJF82049.1 ARO:3003573 LpxA [Acinetobacter baumannii]	253	2.21e-85	48.438	256	131	LpxA	The LpxA gene is widely known to be involved in the biosynthesis of lipid A in Gram-negative bacteria and mutations to this gene may cause resistance to antimicrobial peptides that target the outer membrane	Acinetobacter mutant Lpx gene conferring resistance to colistin	peptide antibiotic	antibiotic target alteration
CJQ_1_02736	298	11	293	94.97	33.4	ALH22601.1	337	4	293	86.05	30.27	ALH22601.1 ARO:3000620 adeL [Acinetobacter baumannii]	177	1.32e-54	35.172	290	181	adeL	AdeL is a regulator of AdeFGH in Acinetobacter baumannii. AdeL mutations are associated with AdeFGH overexpression and multidrug resistance.	resistance-nodulation-cell division (RND) antibiotic efflux pump	fluoroquinolone antibiotic;tetracycline antibiotic	antibiotic efflux
CJQ_1_02752	374	151	341	51.07	12.45	NP_215000.1	480	224	415	40	9.75	NP_215000.1 ARO:3005108 Mycobacterium tuberculosis mshA mutations conferring resistance to prothionamide [Mycobacterium tuberculosis H37Rv]	45.4	4.02e-06	24.378	201	133	Mycobacterium tuberculosis mshA mutations conferring resistance to prothionamide	Mutations in Mycobacterium tuberculosis mshA conferring resistance to prothionamide, an analogue to isoniazid	prothionamide resistant mshA	prothionamide	antibiotic target alteration
CJQ_1_02758	896	647	888	27.01	9.56	AAM15533.1	399	151	391	60.4	21.38	AAM15533.1 ARO:3003688 PvrR [Pseudomonas aeruginosa]	137	0	35.391	243	154	PvrR	PvrR is a response regulator that controls the conversion between antibiotic-resistant and antibiotic-susceptible forms of Pseudomonas aeruginosa biofilms through porin deletion/gene absence	phenotypic variant regulator	aminoglycoside antibiotic	resistance by absence
CJQ_1_02774	309	180	301	39.48	11.14	ACL82957.1	232	4	114	47.84	13.5	ACL82957.1 ARO:3002928 vanRM [Enterococcus faecium]	50.4	3.62e-08	28.226	124	74	vanRM	vanRM is a vanR variant found in the vanM gene cluster	glycopeptide resistance gene cluster;vanR	glycopeptide antibiotic	antibiotic target alteration
CJQ_1_02786	351	36	345	88.32	30.29	BAA11236.1	351	8	308	85.75	29.41	BAA11236.1 ARO:3000206 emrK [Escherichia coli]	168	3.5e-50	34.295	312	192	emrK	emrK is a membrane fusion protein that is a homolog of EmrA. Together with the inner membrane transporter EmrY and the outer membrane channel TolC, it mediates multidrug efflux.	major facilitator superfamily (MFS) antibiotic efflux pump	tetracycline antibiotic	antibiotic efflux
CJQ_1_02787	516	22	516	95.93	30.75	AAF40764.1	508	16	508	97.05	31.11	AAF40764.1 ARO:3003962 farB [Neisseria meningitidis MC58]	252	1.63e-78	32.056	496	333	farB	farB is the cytoplasmic transporter protein that is part of the farAB efflux pump. farB corresponds to 3 loci in Pseudomonas aeruginosa PAO1 and 3 loci in Pseudomonas aeruginosa LESB58.	major facilitator superfamily (MFS) antibiotic efflux pump	antibacterial free fatty acids	antibiotic efflux
CJQ_1_02794	245	36	95	24.49	10.61	ABR75897.1	216	3	59	26.39	11.44	ABR75897.1 ARO:3003373 Klebsiella pneumoniae acrR with mutation conferring multidrug antibiotic resistance [Klebsiella pneumoniae subsp. pneumoniae MGH 78578]	53.5	1.44e-09	43.333	60	31	Klebsiella pneumoniae acrR with mutation conferring multidrug antibiotic resistance	AcrR is a repressor of the AcrAB-TolC multidrug efflux complex. AcrR mutations result in high level antibiotic resistance.	resistance-nodulation-cell division (RND) antibiotic efflux pump	cephalosporin;fluoroquinolone antibiotic;glycylcycline;penam;phenicol antibiotic;rifamycin antibiotic;tetracycline antibiotic;triclosan	antibiotic efflux;antibiotic target alteration
CJQ_1_02800	414	17	412	95.65	36.29	CCP45025.1	416	25	416	94.23	35.75	CCP45025.1 ARO:3003463 Mycobacterium tuberculosis kasA mutant conferring resistance to isoniazid [Mycobacterium tuberculosis H37Rv]	265	0	37.94	398	239	Mycobacterium tuberculosis kasA mutant conferring resistance to isoniazid	Specific mutations on the Mycobacterium tuberculosis kasA gene resulting in lowered affinity of isoniazid, resulting in resistance	antibiotic resistant kasA	isoniazid;triclosan	antibiotic target alteration
CJQ_1_02802	246	1	246	100	65.45	AAC74177.1	244	1	243	99.59	65.18	AAC74177.1 ARO:3004049 antibiotic resistant fabG [Escherichia coli str. K-12 substr. MG1655]	311	0	65.447	246	82	Escherichia coli fabG mutations conferring resistance to triclosan	fabG is a 3-oxoacyl-acyl carrier protein reductase involved in lipid metabolism and fatty acid biosynthesis.The bacterial biocide Triclosan blocks the final reduction step in fatty acid elongation, inhibiting biosynthesis. Point mutations in fabG can confer resistance to Triclosan.	antibiotic resistant fabG	triclosan	antibiotic target alteration
CJQ_1_02821	259	14	218	79.15	20.6	APB03215.1	271	29	233	75.65	19.69	APB03215.1 ARO:3003981 tetB(48) [Paenibacillus sp. LC231]	45.1	2.14e-06	26.027	219	134	tetB(58)	Tetracycline resistant TetB(58) efflux pump found in Paenibacillus sp. LC231, a strain of Paenibacillus isolated from Lechuguilla Cave, NM, USA. Described by Pawlowski et al. 2016.	major facilitator superfamily (MFS) antibiotic efflux pump	tetracycline antibiotic	antibiotic efflux
CJQ_1_02822	310	5	300	95.48	30.89	AAA26793	325	1	305	93.85	30.36	AAA26793 ARO:3003748 oleC [Streptomyces antibioticus]	162	1.04e-48	32.353	306	196	oleC	oleC is an ABC transporter isolated from Streptomyces antibioticus and is involved in oleandomycin secretion.	ATP-binding cassette (ABC) antibiotic efflux pump	macrolide antibiotic	antibiotic efflux
CJQ_1_02851	785	292	537	31.34	10.85	AAC75429.1	1197	698	953	21.39	7.4	AAC75429.1 ARO:3000833 evgS [Escherichia coli str. K-12 substr. MG1655]	150	0	34.615	260	152	evgS	EvgS is a sensor protein that phosphorylates the regulatory protein EvgA. evgS corresponds to 1 locus in Pseudomonas aeruginosa PAO1 and 1 locus in Pseudomonas aeruginosa LESB58.	major facilitator superfamily (MFS) antibiotic efflux pump;resistance-nodulation-cell division (RND) antibiotic efflux pump	fluoroquinolone antibiotic;macrolide antibiotic;penam;tetracycline antibiotic	antibiotic efflux
CJQ_1_02851	785	653	768	14.78	6.37	AAC75429.1	1197	949	1061	9.44	4.07	AAC75429.1 ARO:3000833 evgS [Escherichia coli str. K-12 substr. MG1655]	84.3	0	43.103	116	63	evgS	EvgS is a sensor protein that phosphorylates the regulatory protein EvgA. evgS corresponds to 1 locus in Pseudomonas aeruginosa PAO1 and 1 locus in Pseudomonas aeruginosa LESB58.	major facilitator superfamily (MFS) antibiotic efflux pump;resistance-nodulation-cell division (RND) antibiotic efflux pump	fluoroquinolone antibiotic;macrolide antibiotic;penam;tetracycline antibiotic	antibiotic efflux
CJQ_1_02862	317	10	305	93.38	26.19	ALH22601.1	337	1	293	86.94	24.39	ALH22601.1 ARO:3000620 adeL [Acinetobacter baumannii]	108	0	28.053	303	201	adeL	AdeL is a regulator of AdeFGH in Acinetobacter baumannii. AdeL mutations are associated with AdeFGH overexpression and multidrug resistance.	resistance-nodulation-cell division (RND) antibiotic efflux pump	fluoroquinolone antibiotic;tetracycline antibiotic	antibiotic efflux
CJQ_1_02863	151	9	136	84.77	26.28	BAB41874.1	147	2	130	87.76	27.21	BAB41874.1 ARO:3000815 mgrA [Staphylococcus aureus subsp. aureus N315]	82.8	0	31.008	129	88	mgrA	MgrA, also known as NorR, is a regulator for norA, norB, and tet38. It is a positive regulator for norA expression, but is a direct repressor for norB and an indirect repressor of tet38.	ATP-binding cassette (ABC) antibiotic efflux pump;major facilitator superfamily (MFS) antibiotic efflux pump	acridine dye;cephalosporin;disinfecting agents and intercalating dyes;fluoroquinolone antibiotic;penam;peptide antibiotic;tetracycline antibiotic	antibiotic efflux
CJQ_1_02896	436	12	428	95.64	27.39	ABO11759.2	429	7	426	97.9	28.04	ABO11759.2 ARO:3004573 Acinetobacter baumannii AbaF [Acinetobacter baumannii ATCC 17978]	195	1.13e-58	28.638	426	289	Acinetobacter baumannii AbaF	Expression of abaF in E. coli resulted in increased resistance to fosfomycin.	major facilitator superfamily (MFS) antibiotic efflux pump	fosfomycin	antibiotic efflux
CJQ_1_02906	301	6	137	43.85	13.35	ALH22601.1	337	1	138	40.95	12.46	ALH22601.1 ARO:3000620 adeL [Acinetobacter baumannii]	62.4	6.52e-12	30.435	138	90	adeL	AdeL is a regulator of AdeFGH in Acinetobacter baumannii. AdeL mutations are associated with AdeFGH overexpression and multidrug resistance.	resistance-nodulation-cell division (RND) antibiotic efflux pump	fluoroquinolone antibiotic;tetracycline antibiotic	antibiotic efflux
CJQ_1_02921	240	3	229	94.58	42.73	SIP52035.1	225	2	221	97.78	44.17	SIP52035.1 ARO:3004054 Pseudomonas aeruginosa CpxR [Pseudomonas aeruginosa]	164	1.43e-51	45.175	228	116	Pseudomonas aeruginosa CpxR	CpxR is directly involved in activation of expression of RND efflux pump MexAB-OprM in P. aeruginosa. CpxR is required to enhance mexAB-oprM expression and drug resistance, in the absence of repressor MexR.	resistance-nodulation-cell division (RND) antibiotic efflux pump	aminocoumarin antibiotic;aminoglycoside antibiotic;carbapenem;cephalosporin;cephamycin;diaminopyrimidine antibiotic;fluoroquinolone antibiotic;macrolide antibiotic;monobactam;penam;penem;peptide antibiotic;phenicol antibiotic;sulfonamide antibiotic;tetracycline antibiotic	antibiotic efflux
CJQ_1_02922	458	182	453	59.39	18.37	AAG05187.1	428	134	423	67.76	20.96	AAG05187.1 ARO:3005067 ParS [Pseudomonas aeruginosa PAO1]	113	2.15e-28	30.928	291	181	ParS	ParS is the sensor component of the two-component ParRS system. Alongside its counterpart ParR, it confers resistance to polycationic antibiotics though regulation of efflux pumps and porins.	Outer Membrane Porin (Opr);resistance-nodulation-cell division (RND) antibiotic efflux pump	acridine dye;aminoglycoside antibiotic;carbapenem;cephalosporin;cephamycin;disinfecting agents and intercalating dyes;fluoroquinolone antibiotic;macrolide antibiotic;monobactam;penam;penem;phenicol antibiotic;tetracycline antibiotic	antibiotic efflux;reduced permeability to antibiotic
CJQ_1_02923	439	1	439	100	42.27	AAG04347.1	443	1	443	100	42.27	AAG04347.1 ARO:3003686 Pseudomonas aeruginosa oprD with mutation conferring resistance to imipenem [Pseudomonas aeruginosa PAO1]	319	2.38e-106	42.275	466	219	Pseudomonas aeruginosa oprD with mutation conferring resistance to imipenem	oprD is an outer membrane porin which facilitates the uptake of basic amino acids and imipenem in Pseudomonas aeruginosa.	Outer Membrane Porin (Opr)	carbapenem;cephalosporin;cephamycin;monobactam;penam;penem	reduced permeability to antibiotic
CJQ_1_02926	604	376	587	35.1	11.01	BAA15934.1	467	246	457	45.4	14.24	BAA15934.1 ARO:3000829 baeS [Escherichia coli str. K-12 substr. W3110]	76.3	2e-15	31.364	220	135	baeS	BaeS is a sensor kinase in the BaeSR regulatory system. While it phosphorylates BaeR to increase its activity, BaeS is not necessary for overexpressed BaeR to confer resistance.	resistance-nodulation-cell division (RND) antibiotic efflux pump	aminocoumarin antibiotic;aminoglycoside antibiotic	antibiotic efflux
CJQ_1_02927	468	152	452	64.32	26.45	AAK37618.1	318	23	316	92.45	38.01	AAK37618.1 ARO:3005008 Txr [Vibrio harveyi]	226	0	41.118	304	166	TxR	TxR is a putative transcription regulator that plays a role in conferring tetracycline resistance. It is required for proper functioning of Tet35.	ATP-binding cassette (ABC) antibiotic efflux pump	tetracycline antibiotic	antibiotic efflux
CJQ_1_02944	437	127	424	68.19	21.65	AAG05187.1	428	116	422	71.73	22.77	AAG05187.1 ARO:3005067 ParS [Pseudomonas aeruginosa PAO1]	106	0	31.746	315	190	ParS	ParS is the sensor component of the two-component ParRS system. Alongside its counterpart ParR, it confers resistance to polycationic antibiotics though regulation of efflux pumps and porins.	Outer Membrane Porin (Opr);resistance-nodulation-cell division (RND) antibiotic efflux pump	acridine dye;aminoglycoside antibiotic;carbapenem;cephalosporin;cephamycin;disinfecting agents and intercalating dyes;fluoroquinolone antibiotic;macrolide antibiotic;monobactam;penam;penem;phenicol antibiotic;tetracycline antibiotic	antibiotic efflux;reduced permeability to antibiotic
CJQ_1_02945	246	12	242	93.9	39.84	AAG05188.1	235	8	232	95.74	40.62	AAG05188.1 ARO:3005068 ParR [Pseudomonas aeruginosa PAO1]	167	0	42.424	231	127	ParR	ParR is a component of the two-component sensor ParRS. Alongside its counterpart ParS, it confers resistance to polycationic antibiotics through the regulation of efflux components and porins.	Outer Membrane Porin (Opr);resistance-nodulation-cell division (RND) antibiotic efflux pump	acridine dye;aminoglycoside antibiotic;carbapenem;cephalosporin;cephamycin;disinfecting agents and intercalating dyes;fluoroquinolone antibiotic;macrolide antibiotic;monobactam;penam;penem;phenicol antibiotic;tetracycline antibiotic	antibiotic efflux;reduced permeability to antibiotic
CJQ_1_02946	774	641	720	10.34	5.17	CCP44394.1	481	201	279	16.42	8.21	CCP44394.1 ARO:3004721 Mycobacterium tuberculosis rpsA mutations conferring resistance to Pyrazinamide [Mycobacterium tuberculosis H37Rv]	79.3	0	50	80	39	Mycobacterium tuberculosis rpsA mutations conferring resistance to pyrazinamide	RpsA, the 30S ribosomal protein S1 of Mycobacterium tuberculosis, is involved in trans-translation and is targeted by pyrazinonic acid, the active form of the antibiotic pyrazinamide, which disrupts the initiation of mRNA translation. Mutations in the amino acid sequence of rpsA can confer resistance to pyrazinamide maintaining rpsA function.	pyrazinamide resistant rpsA	pyrazinamide	antibiotic target alteration
CJQ_1_02946	774	649	721	9.43	4.01	CCP44394.1	481	294	366	15.18	6.44	CCP44394.1 ARO:3004721 Mycobacterium tuberculosis rpsA mutations conferring resistance to Pyrazinamide [Mycobacterium tuberculosis H37Rv]	63.2	3.58e-11	42.466	73	42	Mycobacterium tuberculosis rpsA mutations conferring resistance to pyrazinamide	RpsA, the 30S ribosomal protein S1 of Mycobacterium tuberculosis, is involved in trans-translation and is targeted by pyrazinonic acid, the active form of the antibiotic pyrazinamide, which disrupts the initiation of mRNA translation. Mutations in the amino acid sequence of rpsA can confer resistance to pyrazinamide maintaining rpsA function.	pyrazinamide resistant rpsA	pyrazinamide	antibiotic target alteration
CJQ_1_02948	525	17	356	64.76	20.07	AMR95642.1	756	14	314	39.81	12.34	AMR95642.1 ARO:3003805 Enterococcus faecalis gshF with mutation conferring daptomycin resistance [Enterococcus faecalis]	154	0	30.994	342	193	Enterococcus faecalis gshF with mutation conferring daptomycin resistance	gshF is a bifunctional glutamate-cysteine ligase/ glutathione synthetase that when mutated, confers daptomycin resistance.	daptomycin resistant gshF	peptide antibiotic	antibiotic target alteration
CJQ_1_02951	270	11	216	76.3	30.52	AAV85982.1	644	3	220	33.85	13.54	AAV85982.1 ARO:3000535 macB [Neisseria gonorrhoeae]	125	0	40	225	109	macB	MacB is an ATP-binding cassette (ABC) transporter that exports macrolides with 14- or 15- membered lactones. It forms an antibiotic efflux complex with MacA and TolC. macB corresponds to 1 locus in Pseudomonas aeruginosa PAO1 and 1 locus in Pseudomonas aeruginosa LESB58.	ATP-binding cassette (ABC) antibiotic efflux pump	macrolide antibiotic	antibiotic efflux
CJQ_1_02957	443	5	443	99.1	33.83	AAG04347.1	443	17	443	96.39	32.91	AAG04347.1 ARO:3003686 Pseudomonas aeruginosa oprD with mutation conferring resistance to imipenem [Pseudomonas aeruginosa PAO1]	206	1.02e-62	34.141	454	257	Pseudomonas aeruginosa oprD with mutation conferring resistance to imipenem	oprD is an outer membrane porin which facilitates the uptake of basic amino acids and imipenem in Pseudomonas aeruginosa.	Outer Membrane Porin (Opr)	carbapenem;cephalosporin;cephamycin;monobactam;penam;penem	reduced permeability to antibiotic
CJQ_1_02959	262	20	206	71.37	20.03	ADZ12699.1	258	16	211	75.97	21.32	ADZ12699.1 ARO:3005091 RanA [Riemerella anatipestifer RA-GD]	90.1	0	28.061	196	132	RanA	RanA is a part of the RanARanB ABC-type efflux system. Alongside RanB, it confers resistance to aminoglycoside antibiotics.	ATP-binding cassette (ABC) antibiotic efflux pump	aminoglycoside antibiotic	antibiotic efflux
CJQ_1_02964	264	44	257	81.06	18.87	AAC75429.1	1197	307	518	17.71	4.12	AAC75429.1 ARO:3000833 evgS [Escherichia coli str. K-12 substr. MG1655]	51.2	3.27e-08	23.276	232	140	evgS	EvgS is a sensor protein that phosphorylates the regulatory protein EvgA. evgS corresponds to 1 locus in Pseudomonas aeruginosa PAO1 and 1 locus in Pseudomonas aeruginosa LESB58.	major facilitator superfamily (MFS) antibiotic efflux pump;resistance-nodulation-cell division (RND) antibiotic efflux pump	fluoroquinolone antibiotic;macrolide antibiotic;penam;tetracycline antibiotic	antibiotic efflux
CJQ_1_02966	252	1	223	88.49	35.09	AAV85982.1	644	3	223	34.32	13.61	AAV85982.1 ARO:3000535 macB [Neisseria gonorrhoeae]	135	0	39.648	227	127	macB	MacB is an ATP-binding cassette (ABC) transporter that exports macrolides with 14- or 15- membered lactones. It forms an antibiotic efflux complex with MacA and TolC. macB corresponds to 1 locus in Pseudomonas aeruginosa PAO1 and 1 locus in Pseudomonas aeruginosa LESB58.	ATP-binding cassette (ABC) antibiotic efflux pump	macrolide antibiotic	antibiotic efflux
CJQ_1_02971	369	42	251	56.91	21.54	AAV85982.1	644	12	223	32.92	12.46	AAV85982.1 ARO:3000535 macB [Neisseria gonorrhoeae]	142	0	37.85	214	127	macB	MacB is an ATP-binding cassette (ABC) transporter that exports macrolides with 14- or 15- membered lactones. It forms an antibiotic efflux complex with MacA and TolC. macB corresponds to 1 locus in Pseudomonas aeruginosa PAO1 and 1 locus in Pseudomonas aeruginosa LESB58.	ATP-binding cassette (ABC) antibiotic efflux pump	macrolide antibiotic	antibiotic efflux
CJQ_1_02973	631	392	628	37.56	13	AAM15533.1	399	151	386	59.15	20.46	AAM15533.1 ARO:3003688 PvrR [Pseudomonas aeruginosa]	122	0	34.599	237	154	PvrR	PvrR is a response regulator that controls the conversion between antibiotic-resistant and antibiotic-susceptible forms of Pseudomonas aeruginosa biofilms through porin deletion/gene absence	phenotypic variant regulator	aminoglycoside antibiotic	resistance by absence
CJQ_1_02976	420	11	113	24.52	7.78	CCP46065.1	228	8	108	44.3	14.06	CCP46065.1 ARO:3000816 mtrA [Mycobacterium tuberculosis H37Rv]	52.4	1.36e-08	31.731	104	67	mtrA	MtrA is a transcriptional activator of the MtrCDE multidrug efflux pump of Neisseria gonorrhoeae.	resistance-nodulation-cell division (RND) antibiotic efflux pump	macrolide antibiotic;penam	antibiotic efflux
CJQ_1_02986	636	16	628	96.38	28.6	AKA86814	655	35	655	94.81	28.13	AKA86814 ARO:3003746 optrA [Enterococcus faecalis]	290	0	29.67	637	408	optrA	OptrA is a member of the ABC-F protein subfamily that confers resistance to oxazolidinones. The gene encoding the protein was originally isolated from a plasmid in Enterococcus faecalis and Enterococcus faecium.	ABC-F ATP-binding cassette ribosomal protection protein	lincosamide antibiotic;macrolide antibiotic;oxazolidinone antibiotic;phenicol antibiotic;pleuromutilin antibiotic;streptogramin antibiotic;tetracycline antibiotic	antibiotic target protection
CJQ_1_02996	248	3	214	85.48	22.77	AAM09851.1	232	5	217	91.81	24.46	AAM09851.1 ARO:3002923 vanRD [Enterococcus faecium]	54.3	1.04e-09	26.638	229	135	vanRD	vanRD is a mutated vanR variant found in the vanD gene cluster that caused constitutive expression of vanD peptidoglycan synthesis	glycopeptide resistance gene cluster;vanR	glycopeptide antibiotic	antibiotic target alteration
CJQ_1_03008	593	325	580	43.17	12.72	AAM15533.1	399	135	387	63.41	18.68	AAM15533.1 ARO:3003688 PvrR [Pseudomonas aeruginosa]	97.8	0	29.457	258	175	PvrR	PvrR is a response regulator that controls the conversion between antibiotic-resistant and antibiotic-susceptible forms of Pseudomonas aeruginosa biofilms through porin deletion/gene absence	phenotypic variant regulator	aminoglycoside antibiotic	resistance by absence
CJQ_1_03010	535	292	518	42.43	11.54	ADZ12699.1	258	7	231	87.21	23.71	ADZ12699.1 ARO:3005091 RanA [Riemerella anatipestifer RA-GD]	102	0	27.193	228	162	RanA	RanA is a part of the RanARanB ABC-type efflux system. Alongside RanB, it confers resistance to aminoglycoside antibiotics.	ATP-binding cassette (ABC) antibiotic efflux pump	aminoglycoside antibiotic	antibiotic efflux
CJQ_1_03010	535	6	234	42.8	12.34	ADZ12699.1	258	1	214	82.95	23.91	ADZ12699.1 ARO:3005091 RanA [Riemerella anatipestifer RA-GD]	90.5	0	28.821	229	148	RanA	RanA is a part of the RanARanB ABC-type efflux system. Alongside RanB, it confers resistance to aminoglycoside antibiotics.	ATP-binding cassette (ABC) antibiotic efflux pump	aminoglycoside antibiotic	antibiotic efflux
CJQ_1_03016	259	46	119	28.57	8.37	WP_122630831.1	303	104	202	32.67	9.57	WP_122630831.1 ARO:3006864 CRD3-1 [uncultured bacterium]	43.1	8.81e-06	29.293	99	45	CRD3-1	CRD3-1 is a CRD3 beta-lactamase.	CRD3 beta-lactamase	carbapenem	antibiotic inactivation
CJQ_1_03023	82	1	78	95.12	39.02	AAO82599.1	210	133	208	36.19	14.85	AAO82599.1 ARO:3003792 Enterococcus faecalis liaR mutant conferring daptomycin resistance [Enterococcus faecalis V583]	56.6	2.96e-12	41.026	78	44	Enterococcus faecalis liaR mutant conferring daptomycin resistance	liaR is a response regulator found in the liaFSR signal transduction pathway. Mutations confer daptomycin resistance.	daptomycin resistant liaR	peptide antibiotic	antibiotic efflux;antibiotic target alteration
CJQ_1_03058	407	1	318	78.13	18.38	ARB93503.1	389	1	313	80.46	18.93	ARB93503.1 ARO:3004603 tet(56) [Legionella longbeachae]	58.9	2.36e-10	23.529	340	211	tet(56)	A tetracycline inactivating enzyme. A flavoenzyme capable of degrading tetracycline antibiotics.	tetracycline inactivation enzyme	tetracycline antibiotic	antibiotic inactivation
CJQ_1_03069	325	2	243	74.46	22.98	ADT64081.1	339	3	249	72.86	22.48	ADT64081.1 ARO:3000813 MexS [Pseudomonas aeruginosa PAK]	96.3	1.7e-23	30.859	256	154	MexS	MexS is a suppressor of MexT, which is an activator of the multidrug pump MexEF-OprN. Mutations in MexS lead to multidrug resistance.	resistance-nodulation-cell division (RND) antibiotic efflux pump	diaminopyrimidine antibiotic;fluoroquinolone antibiotic;phenicol antibiotic	antibiotic efflux
CJQ_1_03080	949	20	662	67.76	27.39	CDJ73082	848	5	644	75.47	30.51	CDJ73082 ARO:3003900 Escherichia coli CyaA with mutation conferring resistance to fosfomycin [Escherichia coli str. K-12 substr. MC4100]	452	0	40.429	653	366	Escherichia coli cyaA with mutation conferring resistance to fosfomycin	CyaA (adenylate cyclase) is involved with the synthesis of cyclic AMP which regulates the fosfomycin transporter glpT. As a result, mutations to cyaA confer resistance to fosfomycin.	antibiotic-resistant cya adenylate cyclase	fosfomycin	antibiotic target alteration
CJQ_1_03096	122	1	108	88.52	29.51	CCP46065.1	228	4	110	46.93	15.64	CCP46065.1 ARO:3000816 mtrA [Mycobacterium tuberculosis H37Rv]	58.2	3.2e-12	33.333	108	71	mtrA	MtrA is a transcriptional activator of the MtrCDE multidrug efflux pump of Neisseria gonorrhoeae.	resistance-nodulation-cell division (RND) antibiotic efflux pump	macrolide antibiotic;penam	antibiotic efflux
CJQ_1_03097	330	125	313	57.27	17.27	CDJ73205	196	2	188	95.41	28.77	CDJ73205 ARO:3003893 Escherichia coli UhpA with mutation conferring resistance to fosfomycin [Escherichia coli str. K-12 substr. MC4100]	63.5	8.64e-13	30.151	199	117	Escherichia coli UhpA with mutation conferring resistance to fosfomycin	uhpA is a positive activator of the fosfomycin importer uhpT, thus mutations to uhpA confer fosfomycin resistance by reducing uhpT expression. Both knockout and amino acid substitution mutations have been found that confer resistance, with the Protein Knockout model describing the large, knockout mutations causing loss of function of the gene, and the Protein Variant model describing the amino ac…	antibiotic-resistant UhpT	fosfomycin	antibiotic target alteration
CJQ_1_03098	1682	1465	1678	12.72	3.45	BAB38260.1	457	242	452	46.17	12.52	BAB38260.1 ARO:3000830 cpxA [Escherichia coli O157:H7 str. Sakai]	74.3	2.53e-14	27.111	225	139	cpxA	CpxA is a membrane-localized sensor kinase that is activated by envelope stress. It starts a kinase cascade that activates CpxR, which promotes efflux complex expression.	resistance-nodulation-cell division (RND) antibiotic efflux pump	aminocoumarin antibiotic;aminoglycoside antibiotic	antibiotic efflux
CJQ_1_03100	120	29	115	72.5	23.14	AFK13828.1	124	30	117	70.97	22.65	AFK13828.1 ARO:3000823 ramA [Enterobacter cloacae]	43.1	3.24e-07	31.915	94	51	ramA	RamA (resistance antibiotic multiple) is a positive regulator of AcrAB-TolC and leads to high level multidrug resistance in Klebsiella pneumoniae, Salmonella enterica, and Enterobacter aerugenes, increasing the expression of both the mar operon as well as AcrAB. RamA also decreases OmpF expression.	General Bacterial Porin with reduced permeability to beta-lactams;resistance-nodulation-cell division (RND) antibiotic efflux pump	carbapenem;cephalosporin;cephamycin;fluoroquinolone antibiotic;glycylcycline;monobactam;penam;penem;phenicol antibiotic;rifamycin antibiotic;tetracycline antibiotic;triclosan	antibiotic efflux;reduced permeability to antibiotic
CJQ_1_03101	324	227	318	28.4	6.79	BAA15221.2	127	17	108	72.44	17.32	BAA15221.2 ARO:3000263 marA [Escherichia coli str. K-12 substr. W3110]	47	1.4e-07	23.913	92	70	marA	In the presence of antibiotic stress, E. coli overexpresses the global activator protein MarA, which besides inducing MDR efflux pump AcrAB, also down- regulates synthesis of the porin OmpF.	General Bacterial Porin with reduced permeability to beta-lactams;resistance-nodulation-cell division (RND) antibiotic efflux pump	carbapenem;cephalosporin;cephamycin;fluoroquinolone antibiotic;glycylcycline;monobactam;penam;penem;phenicol antibiotic;rifamycin antibiotic;tetracycline antibiotic;triclosan	antibiotic efflux;reduced permeability to antibiotic
CJQ_1_03102	595	1	534	89.75	26.2	AAC60780.1	563	1	548	97.34	28.41	AAC60780.1 ARO:3003049 rosB [Yersinia enterocolitica (type O:8)]	150	1.15e-39	29.189	555	365	rosB	rosB is part of an efflux pump/potassium antiporter system (RosAB) in Yersinia that confers resistance to cationic antimicrobial peptides such as polymyxin B.	major facilitator superfamily (MFS) antibiotic efflux pump	peptide antibiotic	antibiotic efflux
CJQ_1_03105	303	10	298	95.38	29	ALH22601.1	337	4	290	85.16	25.89	ALH22601.1 ARO:3000620 adeL [Acinetobacter baumannii]	123	1.35e-33	30.405	296	190	adeL	AdeL is a regulator of AdeFGH in Acinetobacter baumannii. AdeL mutations are associated with AdeFGH overexpression and multidrug resistance.	resistance-nodulation-cell division (RND) antibiotic efflux pump	fluoroquinolone antibiotic;tetracycline antibiotic	antibiotic efflux
CJQ_1_03106	420	32	416	91.67	40.23	AAG04347.1	443	44	440	89.62	39.33	AAG04347.1 ARO:3003686 Pseudomonas aeruginosa oprD with mutation conferring resistance to imipenem [Pseudomonas aeruginosa PAO1]	315	3.61e-105	43.89	401	205	Pseudomonas aeruginosa oprD with mutation conferring resistance to imipenem	oprD is an outer membrane porin which facilitates the uptake of basic amino acids and imipenem in Pseudomonas aeruginosa.	Outer Membrane Porin (Opr)	carbapenem;cephalosporin;cephamycin;monobactam;penam;penem	reduced permeability to antibiotic
CJQ_1_03115	227	1	214	94.27	52.42	AAG08162.1	221	1	214	96.83	53.85	AAG08162.1 ARO:3003582 basR [Pseudomonas aeruginosa PAO1]	231	0	55.607	214	95	basR	Response regulator for Lipid A modification genes; two-component system involved in polymyxin resistance that senses high extracellular Fe(2+)	pmr phosphoethanolamine transferase	peptide antibiotic	antibiotic efflux;antibiotic target alteration
CJQ_1_03116	440	108	419	70.91	23.85	AEX49906.1	477	123	438	66.25	22.28	AEX49906.1 ARO:3003583 basS [Pseudomonas aeruginosa]	130	0	33.639	327	191	basS	Histidine protein kinase sensor Lipid A modification gene; part of a two-component system involved in polymyxin resistance that senses high extracellular Fe(2+)	pmr phosphoethanolamine transferase	peptide antibiotic	antibiotic efflux;antibiotic target alteration
CJQ_1_03123	549	11	547	97.81	34.05	AAC75271.1	547	2	531	96.89	33.73	AAC75271.1 ARO:3003952 yojI [Escherichia coli str. K-12 substr. MG1655]	297	0	34.807	543	335	YojI	YojI mediates resistance to the peptide antibiotic microcin J25 when it is expressed from a multicopy vector. YojI is capable of pumping out microcin molecules. The outer membrane protein TolC in addition to YojI is required for export of microcin J25 out of the cell. Microcin J25 is thus the first known substrate for YojI.	ATP-binding cassette (ABC) antibiotic efflux pump	peptide antibiotic	antibiotic efflux
CJQ_1_03128	467	1	462	98.93	32.7	AAG03816.1	485	1	467	96.29	31.83	AAG03816.1 ARO:3000379 OprM [Pseudomonas aeruginosa PAO1]	193	0	33.054	478	293	OprM	OprM is an outer membrane factor protein found in Pseudomonas aeruginosa and Burkholderia vietnamiensis. It is part of the MexAB-OprM, MexVW-OprM, MexXY-OprM and the AmrAB-OprM complex.	resistance-nodulation-cell division (RND) antibiotic efflux pump	acridine dye;aminocoumarin antibiotic;aminoglycoside antibiotic;carbapenem;cephalosporin;cephamycin;diaminopyrimidine antibiotic;disinfecting agents and intercalating dyes;fluoroquinolone antibiotic;macrolide antibiotic;monobactam;penam;penem;peptide antibiotic;phenicol antibiotic;sulfonamide antibiotic;tetracycline antibiotic	antibiotic efflux
CJQ_1_03129	655	5	655	99.39	41.11	AAV85982.1	644	3	644	99.69	41.24	AAV85982.1 ARO:3000535 macB [Neisseria gonorrhoeae]	498	0	41.364	660	360	macB	MacB is an ATP-binding cassette (ABC) transporter that exports macrolides with 14- or 15- membered lactones. It forms an antibiotic efflux complex with MacA and TolC. macB corresponds to 1 locus in Pseudomonas aeruginosa PAO1 and 1 locus in Pseudomonas aeruginosa LESB58.	ATP-binding cassette (ABC) antibiotic efflux pump	macrolide antibiotic	antibiotic efflux
CJQ_1_03130	400	31	393	90.75	31.16	AAV85981.1	392	22	370	89.03	30.57	AAV85981.1 ARO:3000533 macA [Neisseria gonorrhoeae]	185	0	34.341	364	223	macA	MacA is a membrane fusion protein that forms an antibiotic efflux complex with MacB and TolC. macA corresponds to 1 locus in Pseudomonas aeruginosa PAO1 and 1 locus in Pseudomonas aeruginosa LESB58.	ATP-binding cassette (ABC) antibiotic efflux pump	macrolide antibiotic	antibiotic efflux
CJQ_1_03133	441	17	397	86.39	24.74	ABO11759.2	429	6	391	89.98	25.77	ABO11759.2 ARO:3004573 Acinetobacter baumannii AbaF [Acinetobacter baumannii ATCC 17978]	150	1.08e-41	28.641	412	237	Acinetobacter baumannii AbaF	Expression of abaF in E. coli resulted in increased resistance to fosfomycin.	major facilitator superfamily (MFS) antibiotic efflux pump	fosfomycin	antibiotic efflux
CJQ_1_03139	270	156	257	37.78	12.37	CDO13836.1	374	248	360	30.21	9.89	CDO13836.1 ARO:3005044 OmpA [Klebsiella pneumoniae]	52.8	8.18e-09	32.743	113	65	OmpA	OmpA is a porin that confers resistance to beta-lactam antibiotics.	General Bacterial Porin with reduced permeability to beta-lactams	carbapenem;cephalosporin;cephamycin;monobactam;penam;penem	reduced permeability to antibiotic
CJQ_1_03163	1017	1	1015	99.8	75.22	AAG03548.1	1015	1	1015	100	75.37	AAG03548.1 ARO:3003681 TriC [Pseudomonas aeruginosa PAO1]	1570	0	75.369	1015	250	TriC	TriC is a resistance nodulation cell division (RND) transporter that is a part of TriABC-OpmH, a triclosan-specific efflux protein.	resistance-nodulation-cell division (RND) antibiotic efflux pump	triclosan	antibiotic efflux
CJQ_1_03164	355	7	355	98.31	57.18	AAG03547.1	356	9	356	97.75	56.86	AAG03547.1 ARO:3003680 TriB [Pseudomonas aeruginosa PAO1]	382	0	58.166	349	145	TriB	TriB is a membrane protein that is fused to TriA and both are required for the triclosan efflux pump function of TriABC-OpmH in P. aeruginosa.	resistance-nodulation-cell division (RND) antibiotic efflux pump	triclosan	antibiotic efflux
CJQ_1_03165	362	8	358	96.96	54.7	AAG03546.1	383	21	368	90.86	51.26	AAG03546.1 ARO:3003679 TriA [Pseudomonas aeruginosa PAO1]	348	1.16e-119	56.41	351	150	TriA	TriA is a membrane protein that is fused to TriB and both are required for the triclosan efflux pump function of TriABC-OpmH in P. aeruginosa.	resistance-nodulation-cell division (RND) antibiotic efflux pump	triclosan	antibiotic efflux
CJQ_1_03168	233	4	231	97.85	26.17	AAA26793	325	1	251	77.23	20.65	AAA26793 ARO:3003748 oleC [Streptomyces antibioticus]	77	0	26.744	258	152	oleC	oleC is an ABC transporter isolated from Streptomyces antibioticus and is involved in oleandomycin secretion.	ATP-binding cassette (ABC) antibiotic efflux pump	macrolide antibiotic	antibiotic efflux
CJQ_1_03185	752	1	751	99.87	86.57	BAA37152.1	754	1	751	99.6	86.34	BAA37152.1 ARO:3003702 Pseudomonas aeruginosa gyrA and parC conferring resistance to fluoroquinolone [Pseudomonas aeruginosa]	1359	0	86.684	751	100	Pseudomonas aeruginosa gyrA and parC conferring resistance to fluoroquinolones	Point mutation in Pseudomonas aeruginosa parC resulting in fluoroquinolone resistance also requiring a gyrA mutation.	fluoroquinolone resistant parC	fluoroquinolone antibiotic	antibiotic target alteration
CJQ_1_03188	634	7	634	99.05	88.8	AAG08352.1	629	2	629	99.84	89.51	AAG08352.1 ARO:3003685 Pseudomonas aeruginosa parE conferring resistance to fluoroquinolones [Pseudomonas aeruginosa PAO1]	1171	0	89.65	628	65	Pseudomonas aeruginosa parE conferring resistance to fluoroquinolones	Point mutation in Pseudomonas aeruginosa parE resulting in sensitivity to fluoroquinolones (ciprofloxacin). In combination with a gyrase mutation (gyrA or gyrB), it confers a high level of resistance to ciprofloxacin.	fluoroquinolone resistant parE	fluoroquinolone antibiotic	antibiotic target alteration
CJQ_1_03196	478	1	478	100	72.8	AAG08359.1	482	1	478	99.17	72.2	AAG08359.1 ARO:3003682 OpmH [Pseudomonas aeruginosa PAO1]	686	0	72.803	478	130	OpmH	OpmH is an outer membrane efflux protein required for triclosan-specific efflux pump function.	resistance-nodulation-cell division (RND) antibiotic efflux pump	triclosan	antibiotic efflux
CJQ_1_03199	110	1	110	100	63.64	AAG08375.1	110	1	110	100	63.64	AAG08375.1 ARO:3004038 Pseudomonas aeruginosa emrE [Pseudomonas aeruginosa PAO1]	124	0	63.636	110	40	Pseudomonas aeruginosa emrE	EmrE is a small multidrug transporter that functions as a homodimer and that couples the efflux of small polyaromatic cations from the cell with the import of protons down an electrochemical gradient. Confers resistance to tetraphenylphosphonium, methyl viologen, gentamicin, kanamycin, and neomycin.	small multidrug resistance (SMR) antibiotic efflux pump	aminoglycoside antibiotic	antibiotic efflux
CJQ_1_03204	602	12	591	96.35	39.17	AAC74000.1	582	8	578	98.11	39.88	AAC74000.1 ARO:3003950 msbA [Escherichia coli str. K-12 substr. MG1655]	458	0	40.652	583	331	msbA	MsbA is a multidrug resistance transporter homolog from E. coli and belongs to a superfamily of transporters that contain an adenosine triphosphate (ATP) binding cassette (ABC) which is also called a nucleotide-binding domain (NBD). MsbA is a member of the MDR-ABC transporter group by sequence homology. MsbA transports lipid A, a major component of the bacterial outer cell membrane, and is the on…	ATP-binding cassette (ABC) antibiotic efflux pump	nitroimidazole antibiotic	antibiotic efflux
CJQ_1_03207	363	179	326	40.77	13.16	NP_215000.1	480	252	403	31.67	10.22	NP_215000.1 ARO:3005108 Mycobacterium tuberculosis mshA mutations conferring resistance to prothionamide [Mycobacterium tuberculosis H37Rv]	48.5	4.36e-07	32.278	158	91	Mycobacterium tuberculosis mshA mutations conferring resistance to prothionamide	Mutations in Mycobacterium tuberculosis mshA conferring resistance to prothionamide, an analogue to isoniazid	prothionamide resistant mshA	prothionamide	antibiotic target alteration
CJQ_1_03212	376	149	331	48.67	17.13	NP_215000.1	480	219	405	38.96	13.71	NP_215000.1 ARO:3005108 Mycobacterium tuberculosis mshA mutations conferring resistance to prothionamide [Mycobacterium tuberculosis H37Rv]	71.6	1.5e-14	35.204	196	105	Mycobacterium tuberculosis mshA mutations conferring resistance to prothionamide	Mutations in Mycobacterium tuberculosis mshA conferring resistance to prothionamide, an analogue to isoniazid	prothionamide resistant mshA	prothionamide	antibiotic target alteration
CJQ_1_03220	475	3	333	69.68	18.95	AAF40764.1	508	2	330	64.76	17.61	AAF40764.1 ARO:3003962 farB [Neisseria meningitidis MC58]	139	7.85e-37	27.193	342	225	farB	farB is the cytoplasmic transporter protein that is part of the farAB efflux pump. farB corresponds to 3 loci in Pseudomonas aeruginosa PAO1 and 3 loci in Pseudomonas aeruginosa LESB58.	major facilitator superfamily (MFS) antibiotic efflux pump	antibacterial free fatty acids	antibiotic efflux
CJQ_1_03227	706	458	696	33.85	9.5	AAM15533.1	399	151	388	59.65	16.73	AAM15533.1 ARO:3003688 PvrR [Pseudomonas aeruginosa]	84	0	28.049	246	162	PvrR	PvrR is a response regulator that controls the conversion between antibiotic-resistant and antibiotic-susceptible forms of Pseudomonas aeruginosa biofilms through porin deletion/gene absence	phenotypic variant regulator	aminoglycoside antibiotic	resistance by absence
CJQ_1_03234	447	21	443	94.63	23.01	ACJ41547.2	434	13	422	94.47	22.97	ACJ41547.2 ARO:3004574 Acinetobacter baumannii AbaQ [Acinetobacter baumannii AB0057]	94	0	24.312	436	291	Acinetobacter baumannii AbaQ	AbaQ is an MFS transporter mainly involved in the extrusion of quinolone-type drugs in A. baumannii	major facilitator superfamily (MFS) antibiotic efflux pump	fluoroquinolone antibiotic	antibiotic efflux
CJQ_1_03235	316	70	307	75.32	20.65	AAF36802.1	322	72	316	76.09	20.86	AAF36802.1 ARO:3002945 vanHF [Paenibacillus popilliae ATCC 14706]	73.6	1.15e-15	27.413	259	153	vanHF	vanHF is a vanH variant in the vanF gene cluster	glycopeptide resistance gene cluster;vanH	glycopeptide antibiotic	antibiotic target alteration
CJQ_1_03236	295	3	127	42.37	13.56	CAA79966.1	295	7	119	38.31	12.26	CAA79966.1 ARO:3003665 NmcR [Enterobacter cloacae]	49.7	8.15e-08	32	125	73	NmcR	NmcR is a homolog of the LysR regulator found in Enterobacter cloacae that contribute to the regulation of NmcA beta-lactamase	NmcA beta-lactamase	carbapenem;cephalosporin;cephamycin;penam	antibiotic inactivation
CJQ_1_03238	450	14	431	92.89	38.04	ACJ41547.2	434	2	419	96.31	39.44	ACJ41547.2 ARO:3004574 Acinetobacter baumannii AbaQ [Acinetobacter baumannii AB0057]	324	0	40.952	420	244	Acinetobacter baumannii AbaQ	AbaQ is an MFS transporter mainly involved in the extrusion of quinolone-type drugs in A. baumannii	major facilitator superfamily (MFS) antibiotic efflux pump	fluoroquinolone antibiotic	antibiotic efflux
CJQ_1_03240	336	3	334	98.81	28.19	ADT64081.1	339	2	335	98.53	28.11	ADT64081.1 ARO:3000813 MexS [Pseudomonas aeruginosa PAK]	85.1	0	28.532	361	202	MexS	MexS is a suppressor of MexT, which is an activator of the multidrug pump MexEF-OprN. Mutations in MexS lead to multidrug resistance.	resistance-nodulation-cell division (RND) antibiotic efflux pump	diaminopyrimidine antibiotic;fluoroquinolone antibiotic;phenicol antibiotic	antibiotic efflux
CJQ_1_03265	448	1	445	99.33	66.96	AAG04569.1	448	1	445	99.33	66.96	AAG04569.1 ARO:3003896 Pseudomonas mutant PhoQ conferring resistance to colistin [Pseudomonas aeruginosa PAO1]	530	0	67.416	445	145	Pseudomonas mutant PhoQ conferring resistance to colistin	Mutations in Pseudomonas aeruginosa PhoQ of the two-component PhoPQ regulatory system. Presence of mutation confers resistance to colistin	ATP-binding cassette (ABC) antibiotic efflux pump;pmr phosphoethanolamine transferase	macrolide antibiotic;peptide antibiotic	antibiotic efflux;antibiotic target alteration
CJQ_1_03266	225	1	225	100	86.22	AAG04568.1	225	1	225	100	86.22	AAG04568.1 ARO:3003895 Pseudomonas mutant PhoP conferring resistance to colistin [Pseudomonas aeruginosa PAO1]	394	0	86.222	225	31	Pseudomonas mutant PhoP conferring resistance to colistin	Mutations in Pseudomonas aeruginosa PhoP of the two-component PhoPQ regulatory system. Presence of mutation confers resistance to colistin.	ATP-binding cassette (ABC) antibiotic efflux pump;pmr phosphoethanolamine transferase	macrolide antibiotic;peptide antibiotic	antibiotic efflux;antibiotic target alteration
CJQ_1_03270	535	204	530	61.12	23.2	AAG05187.1	428	105	426	75.23	28.55	AAG05187.1 ARO:3005067 ParS [Pseudomonas aeruginosa PAO1]	202	0	37.952	332	191	ParS	ParS is the sensor component of the two-component ParRS system. Alongside its counterpart ParR, it confers resistance to polycationic antibiotics though regulation of efflux pumps and porins.	Outer Membrane Porin (Opr);resistance-nodulation-cell division (RND) antibiotic efflux pump	acridine dye;aminoglycoside antibiotic;carbapenem;cephalosporin;cephamycin;disinfecting agents and intercalating dyes;fluoroquinolone antibiotic;macrolide antibiotic;monobactam;penam;penem;phenicol antibiotic;tetracycline antibiotic	antibiotic efflux;reduced permeability to antibiotic
CJQ_1_03271	232	4	227	96.55	49.14	AAG05188.1	235	5	228	95.32	48.51	AAG05188.1 ARO:3005068 ParR [Pseudomonas aeruginosa PAO1]	221	0	50.893	224	110	ParR	ParR is a component of the two-component sensor ParRS. Alongside its counterpart ParS, it confers resistance to polycationic antibiotics through the regulation of efflux components and porins.	Outer Membrane Porin (Opr);resistance-nodulation-cell division (RND) antibiotic efflux pump	acridine dye;aminoglycoside antibiotic;carbapenem;cephalosporin;cephamycin;disinfecting agents and intercalating dyes;fluoroquinolone antibiotic;macrolide antibiotic;monobactam;penam;penem;phenicol antibiotic;tetracycline antibiotic	antibiotic efflux;reduced permeability to antibiotic
CJQ_1_03279	436	2	433	99.08	24.28	CAG39357	452	9	447	97.12	23.8	CAG39357 ARO:3003901 Staphylococcus aureus GlpT with mutation conferring resistance to fosfomycin [Staphylococcus aureus subsp. aureus MRSA252]	80.1	0	24.503	453	307	Staphylococcus aureus GlpT with mutation conferring resistance to fosfomycin	Mutations to the active importer GlpT, which is involved with the uptake of many phosphorylated sugars, confer resistance to fosfomycin by reducing import of the drug into the bacteria.	antibiotic-resistant GlpT	fosfomycin	antibiotic target alteration
CJQ_1_03284	414	28	414	93.48	35.36	AAG04347.1	443	33	443	92.78	35.1	AAG04347.1 ARO:3003686 Pseudomonas aeruginosa oprD with mutation conferring resistance to imipenem [Pseudomonas aeruginosa PAO1]	240	0	37.831	415	226	Pseudomonas aeruginosa oprD with mutation conferring resistance to imipenem	oprD is an outer membrane porin which facilitates the uptake of basic amino acids and imipenem in Pseudomonas aeruginosa.	Outer Membrane Porin (Opr)	carbapenem;cephalosporin;cephamycin;monobactam;penam;penem	reduced permeability to antibiotic
CJQ_1_03292	298	7	290	95.3	33.31	ALH22601.1	337	1	287	85.16	29.76	ALH22601.1 ARO:3000620 adeL [Acinetobacter baumannii]	164	0	34.948	289	181	adeL	AdeL is a regulator of AdeFGH in Acinetobacter baumannii. AdeL mutations are associated with AdeFGH overexpression and multidrug resistance.	resistance-nodulation-cell division (RND) antibiotic efflux pump	fluoroquinolone antibiotic;tetracycline antibiotic	antibiotic efflux
CJQ_1_03310	216	5	205	93.06	25.46	AAO82599.1	210	3	201	94.76	25.93	AAO82599.1 ARO:3003792 Enterococcus faecalis liaR mutant conferring daptomycin resistance [Enterococcus faecalis V583]	79	5.8e-19	27.363	201	144	Enterococcus faecalis liaR mutant conferring daptomycin resistance	liaR is a response regulator found in the liaFSR signal transduction pathway. Mutations confer daptomycin resistance.	daptomycin resistant liaR	peptide antibiotic	antibiotic efflux;antibiotic target alteration
CJQ_1_03315	386	28	270	62.95	19.71	ADZ12699.1	258	7	239	90.31	28.27	ADZ12699.1 ARO:3005091 RanA [Riemerella anatipestifer RA-GD]	119	3.77e-32	31.301	246	153	RanA	RanA is a part of the RanARanB ABC-type efflux system. Alongside RanB, it confers resistance to aminoglycoside antibiotics.	ATP-binding cassette (ABC) antibiotic efflux pump	aminoglycoside antibiotic	antibiotic efflux
CJQ_1_03316	318	20	224	64.47	24.21	CAA79966.1	295	7	204	67.12	25.21	CAA79966.1 ARO:3003665 NmcR [Enterobacter cloacae]	124	3e-34	37.561	205	121	NmcR	NmcR is a homolog of the LysR regulator found in Enterobacter cloacae that contribute to the regulation of NmcA beta-lactamase	NmcA beta-lactamase	carbapenem;cephalosporin;cephamycin;penam	antibiotic inactivation
CJQ_1_03323	449	75	191	26.06	8.25	AAD04032.1	563	81	200	21.31	6.75	AAD04032.1 ARO:3002892 otr(B) [Streptomyces rimosus]	53.5	1.92e-08	31.667	120	79	otr(B)	otr(B) is a tetracycline resistance efflux pump found in Streptomyces rimosus	major facilitator superfamily (MFS) antibiotic efflux pump	tetracycline antibiotic	antibiotic efflux
CJQ_1_03326	348	229	328	28.74	9.2	AAC77032.1	107	7	106	93.46	29.91	AAC77032.1 ARO:3003511 Escherichia coli soxS with mutation conferring antibiotic resistance [Escherichia coli str. K-12 substr. MG1655]	48.5	3.13e-08	32	100	68	Escherichia coli soxS with mutation conferring antibiotic resistance	SoxS is a global regulator that up-regulates the expression of AcrAB efflux genes. It also reduces OmpF expression to decrease cell membrane permeability.	ATP-binding cassette (ABC) antibiotic efflux pump;General Bacterial Porin with reduced permeability to beta-lactams;major facilitator superfamily (MFS) antibiotic efflux pump;resistance-nodulation-cell division (RND) antibiotic efflux pump	carbapenem;cephalosporin;cephamycin;fluoroquinolone antibiotic;glycylcycline;monobactam;penam;penem;phenicol antibiotic;rifamycin antibiotic;tetracycline antibiotic;triclosan	antibiotic efflux;antibiotic target alteration;reduced permeability to antibiotic
CJQ_1_03328	322	67	309	75.47	22.52	AHA41499.1	350	101	344	69.71	20.81	AHA41499.1 ARO:3002948 vanHO [Rhodococcus hoagii]	121	0	29.845	258	152	vanHO	vanHO is a vanH variant in the vanO gene cluster	glycopeptide resistance gene cluster;vanH	glycopeptide antibiotic	antibiotic target alteration
CJQ_1_03373	127	1	123	96.85	36.9	NP_253005.1	124	1	121	97.58	37.17	NP_253005.1 ARO:3004069 MvaT [Pseudomonas aeruginosa PAO1]	83.2	0	38.095	126	70	MvaT	MvaT, a global regulator of virulence genes in P. aeruginosa, has also shown to be able to repress the expression of the MexEF-OprN pump.	resistance-nodulation-cell division (RND) antibiotic efflux pump	diaminopyrimidine antibiotic;fluoroquinolone antibiotic;phenicol antibiotic	antibiotic efflux
CJQ_1_03408	186	1	181	97.31	35.93	BAB95031.1	192	1	191	99.48	36.73	BAB95031.1 ARO:3003788 Bacillus subtilis pgsA mutations conferring resistance to daptomycin [Staphylococcus aureus subsp. aureus MW2]	107	0	36.923	195	105	Bacillus subtilis pgsA with mutation conferring resistance to daptomycin	Point mutations that occur within the Bacillus subtilis pgsA gene resulting in resistance to daptomycin.	daptomycin resistant pgsA	peptide antibiotic	antibiotic target alteration
CJQ_1_03410	193	6	188	94.82	30.42	AAO82599.1	210	25	208	87.62	28.11	AAO82599.1 ARO:3003792 Enterococcus faecalis liaR mutant conferring daptomycin resistance [Enterococcus faecalis V583]	110	0	32.086	187	120	Enterococcus faecalis liaR mutant conferring daptomycin resistance	liaR is a response regulator found in the liaFSR signal transduction pathway. Mutations confer daptomycin resistance.	daptomycin resistant liaR	peptide antibiotic	antibiotic efflux;antibiotic target alteration
CJQ_1_03417	234	5	230	96.58	31.38	AAC74177.1	244	6	241	96.72	31.42	AAC74177.1 ARO:3004049 antibiotic resistant fabG [Escherichia coli str. K-12 substr. MG1655]	108	0	32.489	237	148	Escherichia coli fabG mutations conferring resistance to triclosan	fabG is a 3-oxoacyl-acyl carrier protein reductase involved in lipid metabolism and fatty acid biosynthesis.The bacterial biocide Triclosan blocks the final reduction step in fatty acid elongation, inhibiting biosynthesis. Point mutations in fabG can confer resistance to Triclosan.	antibiotic resistant fabG	triclosan	antibiotic target alteration
CJQ_1_03429	393	5	122	30.03	10.42	AAR84672.1	231	3	122	51.95	18.03	AAR84672.1 ARO:3002925 vanRF [Paenibacillus popilliae ATCC 14706]	77.4	0	34.711	121	75	vanRF	vanRF is a vanR variant found in the vanF gene cluster	glycopeptide resistance gene cluster;vanR	glycopeptide antibiotic	antibiotic target alteration
CJQ_1_03436	226	2	221	97.35	38.05	ATC67679.1	219	3	218	98.63	38.56	ATC67679.1 ARO:3000838 arlR [Staphylococcus aureus subsp. aureus str. Newman]	157	0	39.091	220	130	arlR	ArlR is a response regulator that binds to the norA promoter to activate expression. ArlR must first be phosphorylated by ArlS.	major facilitator superfamily (MFS) antibiotic efflux pump	acridine dye;disinfecting agents and intercalating dyes;fluoroquinolone antibiotic	antibiotic efflux
CJQ_1_03437	449	209	447	53.23	19.3	AAD51347.1	467	223	465	52.03	18.87	AAD51347.1 ARO:3003067 smeS [Stenotrophomonas maltophilia]	111	0	36.255	251	140	smeS	smeS is the protein kinase sensor component of a two component signal transduction system that includes smeR	resistance-nodulation-cell division (RND) antibiotic efflux pump	aminoglycoside antibiotic;cephalosporin;cephamycin;penam	antibiotic efflux
CJQ_1_03438	413	27	412	93.46	20.08	AAV85982.1	644	269	642	58.07	12.47	AAV85982.1 ARO:3000535 macB [Neisseria gonorrhoeae]	58.9	3.39e-10	21.48	419	251	macB	MacB is an ATP-binding cassette (ABC) transporter that exports macrolides with 14- or 15- membered lactones. It forms an antibiotic efflux complex with MacA and TolC. macB corresponds to 1 locus in Pseudomonas aeruginosa PAO1 and 1 locus in Pseudomonas aeruginosa LESB58.	ATP-binding cassette (ABC) antibiotic efflux pump	macrolide antibiotic	antibiotic efflux
CJQ_1_03439	232	10	231	95.69	35.34	AAV85982.1	644	2	222	34.32	12.68	AAV85982.1 ARO:3000535 macB [Neisseria gonorrhoeae]	160	0	36.937	222	139	macB	MacB is an ATP-binding cassette (ABC) transporter that exports macrolides with 14- or 15- membered lactones. It forms an antibiotic efflux complex with MacA and TolC. macB corresponds to 1 locus in Pseudomonas aeruginosa PAO1 and 1 locus in Pseudomonas aeruginosa LESB58.	ATP-binding cassette (ABC) antibiotic efflux pump	macrolide antibiotic	antibiotic efflux
CJQ_1_03449	235	10	112	43.83	14.19	AAG06962.1	212	15	114	47.17	15.27	AAG06962.1 ARO:3000819 nalD [Pseudomonas aeruginosa PAO1]	46.2	4.63e-07	32.381	105	64	nalD	NalD is a repressor of MexAB-OprM. Mutations lead to multidrug resistance and MexAB-OprM overexpression.	resistance-nodulation-cell division (RND) antibiotic efflux pump	aminocoumarin antibiotic;carbapenem;cephalosporin;cephamycin;diaminopyrimidine antibiotic;fluoroquinolone antibiotic;macrolide antibiotic;monobactam;penam;penem;peptide antibiotic;phenicol antibiotic;sulfonamide antibiotic;tetracycline antibiotic	antibiotic efflux
CJQ_1_03460	642	1	640	99.69	33.43	APB03219.1	648	1	635	97.99	32.87	APB03219.1 ARO:3003986 TaeA [Paenibacillus sp. LC231]	343	2.46e-110	33.538	650	407	TaeA	Pleuromutilin (Tiamulin) ABC efflux pump found in Paenibacillus sp. LC231, a strain of Paenibacillus isolated from Lechuguilla Cave, NM, USA. Confers resistance to pleuromutilin antibiotics. Described by Pawlowski et al. 2016.	ATP-binding cassette (ABC) antibiotic efflux pump	pleuromutilin antibiotic	antibiotic efflux
CJQ_1_03465	290	74	273	68.97	21.22	AFK58561.1	355	150	350	56.62	17.42	AFK58561.1 ARO:3003079 Enterococcus faecium liaS mutant conferring daptomycin resistance [Enterococcus faecium DO]	88.6	0	30.769	208	129	Enterococcus faecium liaS mutant conferring daptomycin resistance	liaS is a histidine kinase found in the liaFSR signal transduction pathway. Mutations confer daptomycin resistance.	daptomycin resistant liaS	peptide antibiotic	antibiotic efflux;antibiotic target alteration
CJQ_1_03466	219	3	211	95.43	32.88	AFK58562.1	210	2	205	97.14	33.47	AFK58562.1 ARO:3003078 Enterococcus faecium liaR mutant conferring daptomycin resistance [Enterococcus faecium DO]	138	9.66e-42	34.45	209	132	Enterococcus faecium liaR mutant conferring daptomycin resistance	liaR is a response regulator found in the liaFSR signal transduction pathway. Mutations confer daptomycin resistance.	daptomycin resistant liaR	peptide antibiotic	antibiotic efflux;antibiotic target alteration
CJQ_1_03473	587	11	584	97.79	33.73	AAC74000.1	582	11	580	97.94	33.78	AAC74000.1 ARO:3003950 msbA [Escherichia coli str. K-12 substr. MG1655]	318	3.49e-102	34.489	577	368	msbA	MsbA is a multidrug resistance transporter homolog from E. coli and belongs to a superfamily of transporters that contain an adenosine triphosphate (ATP) binding cassette (ABC) which is also called a nucleotide-binding domain (NBD). MsbA is a member of the MDR-ABC transporter group by sequence homology. MsbA transports lipid A, a major component of the bacterial outer cell membrane, and is the on…	ATP-binding cassette (ABC) antibiotic efflux pump	nitroimidazole antibiotic	antibiotic efflux
CJQ_1_03475	380	54	258	53.95	15.71	AAF36802.1	322	67	297	71.74	20.89	AAF36802.1 ARO:3002945 vanHF [Paenibacillus popilliae ATCC 14706]	94.4	0	29.114	237	130	vanHF	vanHF is a vanH variant in the vanF gene cluster	glycopeptide resistance gene cluster;vanH	glycopeptide antibiotic	antibiotic target alteration
CJQ_1_03478	386	51	267	56.22	17.89	ADZ12699.1	258	21	236	83.72	26.64	ADZ12699.1 ARO:3005091 RanA [Riemerella anatipestifer RA-GD]	119	0	31.818	220	143	RanA	RanA is a part of the RanARanB ABC-type efflux system. Alongside RanB, it confers resistance to aminoglycoside antibiotics.	ATP-binding cassette (ABC) antibiotic efflux pump	aminoglycoside antibiotic	antibiotic efflux
CJQ_1_03479	326	17	146	39.88	15.64	CAA79966.1	295	7	135	43.73	17.16	CAA79966.1 ARO:3003665 NmcR [Enterobacter cloacae]	92	0	39.231	130	78	NmcR	NmcR is a homolog of the LysR regulator found in Enterobacter cloacae that contribute to the regulation of NmcA beta-lactamase	NmcA beta-lactamase	carbapenem;cephalosporin;cephamycin;penam	antibiotic inactivation
CJQ_1_03484	669	19	669	97.31	51.27	AAV85982.1	644	3	644	99.69	52.52	AAV85982.1 ARO:3000535 macB [Neisseria gonorrhoeae]	671	0	52.688	651	299	macB	MacB is an ATP-binding cassette (ABC) transporter that exports macrolides with 14- or 15- membered lactones. It forms an antibiotic efflux complex with MacA and TolC. macB corresponds to 1 locus in Pseudomonas aeruginosa PAO1 and 1 locus in Pseudomonas aeruginosa LESB58.	ATP-binding cassette (ABC) antibiotic efflux pump	macrolide antibiotic	antibiotic efflux
CJQ_1_03485	385	31	382	91.43	36.21	AAV85981.1	392	26	377	89.8	35.57	AAV85981.1 ARO:3000533 macA [Neisseria gonorrhoeae]	214	0	39.607	356	207	macA	MacA is a membrane fusion protein that forms an antibiotic efflux complex with MacB and TolC. macA corresponds to 1 locus in Pseudomonas aeruginosa PAO1 and 1 locus in Pseudomonas aeruginosa LESB58.	ATP-binding cassette (ABC) antibiotic efflux pump	macrolide antibiotic	antibiotic efflux
CJQ_1_03494	337	164	335	51.04	13.55	NON98701.1	184	8	181	94.57	25.11	NON98701.1 ARO:3005117 AAC(6')-Ib-cr7 [Klebsiella pneumoniae]	46.6	4.72e-07	26.554	177	122	AAC(6')-Ib-cr7	A fluoroquinolone-acetylating aminoglycoside acetyltransferase variant identified from Klebsiella. These proteins confer resistance to both fluoroquinolone and aminoglycoside antibiotics.	AAC(6')-Ib-cr	aminoglycoside antibiotic;fluoroquinolone antibiotic	antibiotic inactivation
CJQ_1_03513	244	53	226	71.31	17.42	BAE77933.1	210	30	204	83.33	20.36	BAE77933.1 ARO:3000518 CRP [Escherichia coli str. K-12 substr. W3110]	57	8.08e-11	24.432	176	130	CRP	CRP is a global regulator that represses MdtEF multidrug efflux pump expression.	resistance-nodulation-cell division (RND) antibiotic efflux pump	fluoroquinolone antibiotic;macrolide antibiotic;penam	antibiotic efflux
CJQ_1_03539	203	6	79	36.45	12.95	AAG06962.1	212	9	84	35.85	12.74	AAG06962.1 ARO:3000819 nalD [Pseudomonas aeruginosa PAO1]	46.6	2.42e-07	35.526	76	47	nalD	NalD is a repressor of MexAB-OprM. Mutations lead to multidrug resistance and MexAB-OprM overexpression.	resistance-nodulation-cell division (RND) antibiotic efflux pump	aminocoumarin antibiotic;carbapenem;cephalosporin;cephamycin;diaminopyrimidine antibiotic;fluoroquinolone antibiotic;macrolide antibiotic;monobactam;penam;penem;peptide antibiotic;phenicol antibiotic;sulfonamide antibiotic;tetracycline antibiotic	antibiotic efflux
CJQ_1_03550	318	105	239	42.45	13.85	APB03216.1	287	62	201	48.78	15.91	APB03216.1 ARO:3003982 LlmA 23S ribosomal RNA methyltransferase [Paenibacillus sp. LC231]	55.5	9.99e-10	32.624	141	88	LlmA 23S ribosomal RNA methyltransferase	Lincosamide (Clindamycin) resistant (putative) ribosomal methyltransferase related to the RlmK 23S rRNA methyltransferase COG family. Detected in Paenibacillus sp. LC231, an isolated strain of Paenibacillus found in Lechuguilla Cave, NM, USA. Described by Pawlowski et al. 2016.	Llm 23S ribosomal RNA methyltransferase	lincosamide antibiotic	antibiotic target alteration
CJQ_1_03558	297	10	297	96.97	26.57	CAA79966.1	295	6	288	95.93	26.28	CAA79966.1 ARO:3003665 NmcR [Enterobacter cloacae]	102	0	27.397	292	199	NmcR	NmcR is a homolog of the LysR regulator found in Enterobacter cloacae that contribute to the regulation of NmcA beta-lactamase	NmcA beta-lactamase	carbapenem;cephalosporin;cephamycin;penam	antibiotic inactivation
CJQ_1_03561	312	77	300	71.79	22.95	AAM09850.1	323	82	316	72.76	23.26	AAM09850.1 ARO:3002944 vanHD [Enterococcus faecium]	104	0	31.967	244	137	vanHD	vanHD is a vanH variant in the vanD gene cluster	glycopeptide resistance gene cluster;vanH	glycopeptide antibiotic	antibiotic target alteration
CJQ_1_03571	210	23	191	80.48	26.2	APB03214.1	343	36	207	50.15	16.33	APB03214.1 ARO:3003980 tetA(48) [Paenibacillus sp. LC231]	87.8	0	32.558	172	113	tetA(58)	TetA(58) is a Tetracycline efflux pump described in Paenibacillus sp. LC231, a strain of Paenibacillus isolated from Lechuguilla Cave, NM, USA. Described by Pawlowski et al. 2016.	major facilitator superfamily (MFS) antibiotic efflux pump	tetracycline antibiotic	antibiotic efflux
CJQ_1_03582	374	3	106	27.81	10.7	AFK58562.1	210	2	104	49.05	18.86	AFK58562.1 ARO:3003078 Enterococcus faecium liaR mutant conferring daptomycin resistance [Enterococcus faecium DO]	70.9	3.98e-15	38.462	104	63	Enterococcus faecium liaR mutant conferring daptomycin resistance	liaR is a response regulator found in the liaFSR signal transduction pathway. Mutations confer daptomycin resistance.	daptomycin resistant liaR	peptide antibiotic	antibiotic efflux;antibiotic target alteration
CJQ_1_03585	128	5	128	96.88	31.25	AAG04568.1	225	1	121	53.78	17.35	AAG04568.1 ARO:3003895 Pseudomonas mutant PhoP conferring resistance to colistin [Pseudomonas aeruginosa PAO1]	74.3	0	32.258	124	81	Pseudomonas mutant PhoP conferring resistance to colistin	Mutations in Pseudomonas aeruginosa PhoP of the two-component PhoPQ regulatory system. Presence of mutation confers resistance to colistin.	ATP-binding cassette (ABC) antibiotic efflux pump;pmr phosphoethanolamine transferase	macrolide antibiotic;peptide antibiotic	antibiotic efflux;antibiotic target alteration
CJQ_1_03600	563	7	128	21.67	7.46	ACL82957.1	232	4	120	50.43	17.36	ACL82957.1 ARO:3002928 vanRM [Enterococcus faecium]	79	0	34.426	122	75	vanRM	vanRM is a vanR variant found in the vanM gene cluster	glycopeptide resistance gene cluster;vanR	glycopeptide antibiotic	antibiotic target alteration
CJQ_1_03608	451	144	437	65.19	25.19	AAK37618.1	318	39	312	86.16	33.3	AAK37618.1 ARO:3005008 Txr [Vibrio harveyi]	207	2.76e-64	38.644	295	159	TxR	TxR is a putative transcription regulator that plays a role in conferring tetracycline resistance. It is required for proper functioning of Tet35.	ATP-binding cassette (ABC) antibiotic efflux pump	tetracycline antibiotic	antibiotic efflux
CJQ_1_03609	405	9	395	95.56	23.21	CAG39047	608	209	597	63.98	15.54	CAG39047 ARO:3003794 Staphylococcus aureus walK with mutation conferring daptomycin resistance [Staphylococcus aureus subsp. aureus MRSA252]	87.4	0	24.286	420	254	Staphylococcus aureus walK with mutation conferring resistance to daptomycin	walK is the histidine kinase sensor of a two-component regulatory system controlling peptidoglycan metabolism through regulation of the expression of most of the peptidoglycan hydrolase genes. Mutations in the gene have been found that confer daptomycin resistance.	daptomycin resistant walK	peptide antibiotic	antibiotic target alteration
CJQ_1_03610	491	146	480	68.23	26.6	AAK37618.1	318	23	316	92.45	36.05	AAK37618.1 ARO:3005008 Txr [Vibrio harveyi]	230	1.12e-72	38.988	336	162	TxR	TxR is a putative transcription regulator that plays a role in conferring tetracycline resistance. It is required for proper functioning of Tet35.	ATP-binding cassette (ABC) antibiotic efflux pump	tetracycline antibiotic	antibiotic efflux
CJQ_1_03645	551	19	530	92.92	19.73	ANZ79240.1	579	31	549	89.64	19.03	ANZ79240.1 ARO:3004035 tetA(60) [uncultured bacterium]	79.3	0	21.229	537	380	tetA(60)	tetA(60) is a subunit of tetAB(60), an ABC transporter that confers resistance to tetracycline and tigercycline identified by screening a human saliva metagenomic library in Escherichia coli, which is required for resistance.	ATP-binding cassette (ABC) antibiotic efflux pump	tetracycline antibiotic	antibiotic efflux
CJQ_1_03655	291	6	266	89.69	23.37	AAA99504.1	306	4	214	68.95	17.97	AAA99504.1 ARO:3002987 bcrA [Bacillus licheniformis]	95.1	1.26e-23	26.054	261	143	bcrA	bcrA is an ABC transporter found in Bacillus licheniformis that confers bacitracin resistance	ATP-binding cassette (ABC) antibiotic efflux pump	peptide antibiotic	antibiotic efflux
CJQ_1_03656	238	15	224	88.24	26.8	APB03214.1	343	27	235	60.93	18.51	APB03214.1 ARO:3003980 tetA(48) [Paenibacillus sp. LC231]	88.6	0	30.374	214	140	tetA(58)	TetA(58) is a Tetracycline efflux pump described in Paenibacillus sp. LC231, a strain of Paenibacillus isolated from Lechuguilla Cave, NM, USA. Described by Pawlowski et al. 2016.	major facilitator superfamily (MFS) antibiotic efflux pump	tetracycline antibiotic	antibiotic efflux
CJQ_1_03657	255	6	237	90.98	23.62	AAC74177.1	244	9	237	93.85	24.36	AAC74177.1 ARO:3004049 antibiotic resistant fabG [Escherichia coli str. K-12 substr. MG1655]	73.2	2.43e-16	25.957	235	165	Escherichia coli fabG mutations conferring resistance to triclosan	fabG is a 3-oxoacyl-acyl carrier protein reductase involved in lipid metabolism and fatty acid biosynthesis.The bacterial biocide Triclosan blocks the final reduction step in fatty acid elongation, inhibiting biosynthesis. Point mutations in fabG can confer resistance to Triclosan.	antibiotic resistant fabG	triclosan	antibiotic target alteration
CJQ_1_03671	232	1	189	81.47	21.11	ADZ12699.1	258	1	193	74.81	19.38	ADZ12699.1 ARO:3005091 RanA [Riemerella anatipestifer RA-GD]	98.2	1.31e-25	25.907	193	139	RanA	RanA is a part of the RanARanB ABC-type efflux system. Alongside RanB, it confers resistance to aminoglycoside antibiotics.	ATP-binding cassette (ABC) antibiotic efflux pump	aminoglycoside antibiotic	antibiotic efflux
CJQ_1_03672	285	53	273	77.54	21.56	APB03214.1	343	26	236	61.52	17.1	APB03214.1 ARO:3003980 tetA(48) [Paenibacillus sp. LC231]	84.3	1.42e-19	27.803	223	147	tetA(58)	TetA(58) is a Tetracycline efflux pump described in Paenibacillus sp. LC231, a strain of Paenibacillus isolated from Lechuguilla Cave, NM, USA. Described by Pawlowski et al. 2016.	major facilitator superfamily (MFS) antibiotic efflux pump	tetracycline antibiotic	antibiotic efflux
CJQ_1_03695	891	365	782	46.91	14.43	AAC75429.1	1197	711	1145	36.34	11.18	AAC75429.1 ARO:3000833 evgS [Escherichia coli str. K-12 substr. MG1655]	164	0	30.752	452	262	evgS	EvgS is a sensor protein that phosphorylates the regulatory protein EvgA. evgS corresponds to 1 locus in Pseudomonas aeruginosa PAO1 and 1 locus in Pseudomonas aeruginosa LESB58.	major facilitator superfamily (MFS) antibiotic efflux pump;resistance-nodulation-cell division (RND) antibiotic efflux pump	fluoroquinolone antibiotic;macrolide antibiotic;penam;tetracycline antibiotic	antibiotic efflux
CJQ_1_03695	891	716	871	17.51	5.16	AAC75429.1	1197	922	1067	12.2	3.6	AAC75429.1 ARO:3000833 evgS [Escherichia coli str. K-12 substr. MG1655]	69.3	1e-12	29.487	156	100	evgS	EvgS is a sensor protein that phosphorylates the regulatory protein EvgA. evgS corresponds to 1 locus in Pseudomonas aeruginosa PAO1 and 1 locus in Pseudomonas aeruginosa LESB58.	major facilitator superfamily (MFS) antibiotic efflux pump;resistance-nodulation-cell division (RND) antibiotic efflux pump	fluoroquinolone antibiotic;macrolide antibiotic;penam;tetracycline antibiotic	antibiotic efflux
CJQ_1_03712	629	20	607	93.48	25.62	AAF40852.1	581	27	561	92.08	25.24	AAF40852.1 ARO:3003937 Neisseria meningititis PBP2 conferring resistance to beta-lactam [Neisseria meningitidis MC58]	176	1.17e-48	27.406	613	342	Neisseria meningititis PBP2 conferring resistance to beta-lactam	Point mutation in Neisseria meningititis PBP2 (penA) decreases affinity between beta-lactam antibiotic molecule and PBP2, thereby conferring resistance to beta-lactam.	Penicillin-binding protein mutations conferring resistance to beta-lactam antibiotics	carbapenem;cephalosporin;cephamycin;monobactam;penam	antibiotic target alteration
CJQ_1_03725	868	11	801	91.13	19.99	CAA52296.1	917	24	790	83.64	18.35	CAA52296.1 ARO:3003729 Staphylococcus aureus ileS with mutation conferring resistance to mupirocin [Staphylococcus aureus]	131	0	21.935	889	474	Staphylococcus aureus ileS with mutation conferring resistance to mupirocin	Point mutations to the isoleucyl-tRNA synthetase (ileS) in Staphylococcus aureus that confer resistance to mupirocin.	antibiotic-resistant isoleucyl-tRNA synthetase (ileS)	mupirocin	antibiotic target alteration
CJQ_1_03736	662	396	648	38.22	10.48	AAC75429.1	1197	686	940	21.3	5.84	AAC75429.1 ARO:3000833 evgS [Escherichia coli str. K-12 substr. MG1655]	108	0	27.413	259	178	evgS	EvgS is a sensor protein that phosphorylates the regulatory protein EvgA. evgS corresponds to 1 locus in Pseudomonas aeruginosa PAO1 and 1 locus in Pseudomonas aeruginosa LESB58.	major facilitator superfamily (MFS) antibiotic efflux pump;resistance-nodulation-cell division (RND) antibiotic efflux pump	fluoroquinolone antibiotic;macrolide antibiotic;penam;tetracycline antibiotic	antibiotic efflux
CJQ_1_03746	647	6	124	18.39	8.04	AAL27445.1	229	3	117	50.22	21.94	AAL27445.1 ARO:3002924 vanRE [Enterococcus faecalis]	91.7	0	43.697	119	63	vanRE	vanRE is a vanR variant found in the vanE gene cluster	glycopeptide resistance gene cluster;vanR	glycopeptide antibiotic	antibiotic target alteration
CJQ_1_03746	647	529	641	17.47	4.88	AAL27445.1	229	3	113	48.47	13.56	AAL27445.1 ARO:3002924 vanRE [Enterococcus faecalis]	48.5	4.62e-07	27.966	118	73	vanRE	vanRE is a vanR variant found in the vanE gene cluster	glycopeptide resistance gene cluster;vanR	glycopeptide antibiotic	antibiotic target alteration
CJQ_1_03747	282	31	279	88.3	28.52	AAC75429.1	1197	694	943	20.89	6.75	AAC75429.1 ARO:3000833 evgS [Escherichia coli str. K-12 substr. MG1655]	131	0	32.296	257	159	evgS	EvgS is a sensor protein that phosphorylates the regulatory protein EvgA. evgS corresponds to 1 locus in Pseudomonas aeruginosa PAO1 and 1 locus in Pseudomonas aeruginosa LESB58.	major facilitator superfamily (MFS) antibiotic efflux pump;resistance-nodulation-cell division (RND) antibiotic efflux pump	fluoroquinolone antibiotic;macrolide antibiotic;penam;tetracycline antibiotic	antibiotic efflux
CJQ_1_03758	369	6	237	62.87	17.63	ADZ12699.1	258	1	237	91.86	25.75	ADZ12699.1 ARO:3005091 RanA [Riemerella anatipestifer RA-GD]	114	0	28.033	239	163	RanA	RanA is a part of the RanARanB ABC-type efflux system. Alongside RanB, it confers resistance to aminoglycoside antibiotics.	ATP-binding cassette (ABC) antibiotic efflux pump	aminoglycoside antibiotic	antibiotic efflux
CJQ_1_03768	244	1	221	90.57	32.72	AAV85982.1	644	3	227	34.94	12.62	AAV85982.1 ARO:3000535 macB [Neisseria gonorrhoeae]	137	0	36.123	227	137	macB	MacB is an ATP-binding cassette (ABC) transporter that exports macrolides with 14- or 15- membered lactones. It forms an antibiotic efflux complex with MacA and TolC. macB corresponds to 1 locus in Pseudomonas aeruginosa PAO1 and 1 locus in Pseudomonas aeruginosa LESB58.	ATP-binding cassette (ABC) antibiotic efflux pump	macrolide antibiotic	antibiotic efflux
CJQ_1_03769	634	413	605	30.44	7.65	ADM92606.1	361	144	338	54.02	13.57	ADM92606.1 ARO:3000549 adeS [Acinetobacter baumannii]	62.4	3.56e-11	25.123	203	134	adeS	AdeS is a sensor kinase in the AdeRS regulatory system of AdeABC. It is essential for AdeABC expression.	resistance-nodulation-cell division (RND) antibiotic efflux pump	glycylcycline;tetracycline antibiotic	antibiotic efflux
CJQ_1_03770	442	147	441	66.74	28.48	AAK37618.1	318	23	316	92.45	39.45	AAK37618.1 ARO:3005008 Txr [Vibrio harveyi]	238	0	42.667	300	161	TxR	TxR is a putative transcription regulator that plays a role in conferring tetracycline resistance. It is required for proper functioning of Tet35.	ATP-binding cassette (ABC) antibiotic efflux pump	tetracycline antibiotic	antibiotic efflux
CJQ_1_03771	305	18	125	35.41	9.51	CAA79966.1	295	21	126	35.93	9.65	CAA79966.1 ARO:3003665 NmcR [Enterobacter cloacae]	46.6	9.05e-07	26.852	108	77	NmcR	NmcR is a homolog of the LysR regulator found in Enterobacter cloacae that contribute to the regulation of NmcA beta-lactamase	NmcA beta-lactamase	carbapenem;cephalosporin;cephamycin;penam	antibiotic inactivation
CJQ_1_03777	806	4	806	99.63	68.4	BAE77595.1	804	2	804	99.88	68.57	BAE77595.1 ARO:3003303 Escherichia coli gyrB conferring resistance to aminocoumarin [Escherichia coli str. K-12 substr. W3110]	1146	0	68.657	804	250	Escherichia coli gyrB conferring resistance to aminocoumarin	Point mutation in Escherichia coli resulting in aminocoumarin resistance	aminocoumarin resistant gyrB	aminocoumarin antibiotic	antibiotic target alteration
CJQ_1_03786	216	47	183	63.43	18.12	CCP46748.1	224	34	171	61.61	17.6	CCP46748.1 ARO:3003470 Mycobacterium tuberculosis gidB mutation conferring resistance to streptomycin [Mycobacterium tuberculosis H37Rv]	64.3	1.85e-13	28.571	140	95	Mycobacterium tuberculosis gidB mutation conferring resistance to streptomycin	Specific mutations that occurs on Mycobacterium tuberculosis gidB causing it to be streptomycin resistant	antibiotic resistant gidB	aminoglycoside antibiotic	antibiotic target alteration
CJQ_1_03803	168	27	157	77.98	24.62	AAC74603.2	144	14	143	90.28	28.51	AAC74603.2 ARO:3003378 Escherichia coli marR mutant conferring antibiotic resistance [Escherichia coli str. K-12 substr. MG1655]	58.9	1.83e-12	31.579	133	86	Escherichia coli marR mutant conferring antibiotic resistance	MarR is a repressor of the mar operon marRAB, thus regulating the expression of marA, the activator of multidrug efflux pump AcrAB.	resistance-nodulation-cell division (RND) antibiotic efflux pump	cephalosporin;fluoroquinolone antibiotic;glycylcycline;penam;phenicol antibiotic;rifamycin antibiotic;tetracycline antibiotic;triclosan	antibiotic efflux;antibiotic target alteration
CJQ_1_03804	312	36	284	79.81	18.27	AAG05880.1	347	78	320	70.03	16.03	AAG05880.1 ARO:3000814 MexT [Pseudomonas aeruginosa PAO1]	64.3	1.62e-12	22.892	249	186	MexT	MexT is a LysR-type transcriptional activator that positively regulates the expression of MexEF-OprN, OprD, and MexS.	resistance-nodulation-cell division (RND) antibiotic efflux pump	diaminopyrimidine antibiotic;fluoroquinolone antibiotic;phenicol antibiotic	antibiotic efflux
CJQ_1_03808	396	22	375	89.39	27.43	ALV80601.1	402	28	384	88.81	27.25	ALV80601.1 ARO:3003801 bcr-1 [Pseudomonas aeruginosa]	122	0	30.685	365	234	bcr-1	Transmembrane protein which expels bicyclomycin from the cell, leading to bicyclomycin resistance. Identified in Pseudomonas aeruginosa strains responsible for outbreaks in Brazil, often appearing with blaSPM-1, another bicyclomycin resistance gene	major facilitator superfamily (MFS) antibiotic efflux pump	bicyclomycin	antibiotic efflux
CJQ_1_03811	479	12	479	97.7	31.96	ALL09868.1	483	5	483	99.17	32.44	ALL09868.1 ARO:3003092 Enterococcus faecium cls conferring resistance to daptomycin [Enterococcus faecium]	281	0	32.708	480	310	Enterococcus faecium cls conferring resistance to daptomycin	cls or cardiolipin synthetase is an inner membrane protein that is involved in membrane synthesis. Specific mutations in Enterococcus can confer resistance to daptomycin.	daptomycin resistant cls	peptide antibiotic	antibiotic target alteration
CJQ_1_03821	586	2	381	64.85	18.89	AAC60780.1	563	3	388	68.56	19.97	AAC60780.1 ARO:3003049 rosB [Yersinia enterocolitica (type O:8)]	155	0	29.124	388	265	rosB	rosB is part of an efflux pump/potassium antiporter system (RosAB) in Yersinia that confers resistance to cationic antimicrobial peptides such as polymyxin B.	major facilitator superfamily (MFS) antibiotic efflux pump	peptide antibiotic	antibiotic efflux
CJQ_1_03829	320	13	135	38.44	10.07	ALH22601.1	337	1	124	36.8	9.64	ALH22601.1 ARO:3000620 adeL [Acinetobacter baumannii]	47.4	6.17e-07	26.19	126	88	adeL	AdeL is a regulator of AdeFGH in Acinetobacter baumannii. AdeL mutations are associated with AdeFGH overexpression and multidrug resistance.	resistance-nodulation-cell division (RND) antibiotic efflux pump	fluoroquinolone antibiotic;tetracycline antibiotic	antibiotic efflux
CJQ_1_03835	148	65	148	56.76	17.82	AAP26981.1	184	84	167	45.65	14.33	AAP26981.1 ARO:3005045 SatA [Bacillus anthracis str. Ames]	43.1	1.13e-06	31.395	86	55	SatA	SatA is part of the Streptothricin acetyltransferase gene family. It confers resistance to nucleoside antibiotics.	streptothricin acetyltransferase (SAT)	nucleoside antibiotic	antibiotic inactivation
CJQ_1_03840	330	224	328	31.82	8.79	ANK04027.1	242	129	233	43.39	11.98	ANK04027.1 ARO:3003838 gadW [Escherichia coli O25b:H4]	53.9	2.71e-09	27.619	105	76	gadW	GadW is an AraC-family regulator that promotes mdtEF expression to confer multidrug resistance. GadW inhibits GadX-dependent activation. GadW clearly represses gadX and, in situations where GadX is missing, activates gadA and gadBC.	resistance-nodulation-cell division (RND) antibiotic efflux pump	fluoroquinolone antibiotic;macrolide antibiotic;penam	antibiotic efflux
CJQ_1_03842	301	8	130	40.86	12.19	CAA79966.1	295	10	130	41.02	12.24	CAA79966.1 ARO:3003665 NmcR [Enterobacter cloacae]	46.6	9.92e-07	29.839	124	83	NmcR	NmcR is a homolog of the LysR regulator found in Enterobacter cloacae that contribute to the regulation of NmcA beta-lactamase	NmcA beta-lactamase	carbapenem;cephalosporin;cephamycin;penam	antibiotic inactivation
CJQ_1_03850	429	15	400	89.98	28.3	ABO11759.2	429	1	391	91.14	28.67	ABO11759.2 ARO:3004573 Acinetobacter baumannii AbaF [Acinetobacter baumannii ATCC 17978]	184	0	31.458	391	263	Acinetobacter baumannii AbaF	Expression of abaF in E. coli resulted in increased resistance to fosfomycin.	major facilitator superfamily (MFS) antibiotic efflux pump	fosfomycin	antibiotic efflux
CJQ_1_03854	277	28	252	81.23	23.51	AAA99504.1	306	2	213	69.28	20.05	AAA99504.1 ARO:3002987 bcrA [Bacillus licheniformis]	102	1.94e-26	28.947	228	143	bcrA	bcrA is an ABC transporter found in Bacillus licheniformis that confers bacitracin resistance	ATP-binding cassette (ABC) antibiotic efflux pump	peptide antibiotic	antibiotic efflux
CJQ_1_03856	298	5	131	42.62	13.09	BAE85478.1	232	4	125	52.59	16.15	BAE85478.1 ARO:3003728 vanRI [Desulfitobacterium hafniense Y51]	65.9	1.49e-13	30.709	127	83	vanRI	VanRI is the regulatory transcriptional activator in the VanSR regulator within the VanI glycopeptide resistance gene cluster.	glycopeptide resistance gene cluster;vanR	glycopeptide antibiotic	antibiotic target alteration
CJQ_1_03859	435	73	431	82.53	22.49	CAG39047	608	238	601	59.87	16.31	CAG39047 ARO:3003794 Staphylococcus aureus walK with mutation conferring daptomycin resistance [Staphylococcus aureus subsp. aureus MRSA252]	129	0	27.249	378	242	Staphylococcus aureus walK with mutation conferring resistance to daptomycin	walK is the histidine kinase sensor of a two-component regulatory system controlling peptidoglycan metabolism through regulation of the expression of most of the peptidoglycan hydrolase genes. Mutations in the gene have been found that confer daptomycin resistance.	daptomycin resistant walK	peptide antibiotic	antibiotic target alteration
CJQ_1_03860	229	1	226	98.69	38.54	AAR84672.1	231	1	230	99.57	38.89	AAR84672.1 ARO:3002925 vanRF [Paenibacillus popilliae ATCC 14706]	163	0	39.056	233	132	vanRF	vanRF is a vanR variant found in the vanF gene cluster	glycopeptide resistance gene cluster;vanR	glycopeptide antibiotic	antibiotic target alteration
CJQ_1_03879	290	18	148	45.17	12.41	CAA79966.1	295	18	146	43.73	12.02	CAA79966.1 ARO:3003665 NmcR [Enterobacter cloacae]	46.6	7.13e-07	27.481	131	93	NmcR	NmcR is a homolog of the LysR regulator found in Enterobacter cloacae that contribute to the regulation of NmcA beta-lactamase	NmcA beta-lactamase	carbapenem;cephalosporin;cephamycin;penam	antibiotic inactivation
CJQ_1_03900	517	47	230	35.59	10.77	ABD31357.1	494	123	295	35.02	10.6	ABD31357.1 ARO:3003074 Staphylococcus aureus cls conferring resistance to daptomycin [Staphylococcus aureus subsp. aureus NCTC 8325]	68.2	4.79e-13	30.27	185	116	Staphylococcus aureus cls conferring resistance to daptomycin	cls or cardiolipin synthetase is an inner membrane protein that is involved in membrane synthesis. Specific mutations in S. aureus can confer resistance to daptomycin.	daptomycin resistant cls	peptide antibiotic	antibiotic target alteration
CJQ_1_03908	356	8	343	94.38	28.21	ABA71733.1	712	349	698	49.16	14.69	ABA71733.1 ARO:3002972 vanTG [Enterococcus faecalis]	166	0	29.888	358	221	vanTG	vanTG is a vanT variant found in the vanG gene cluster	glycopeptide resistance gene cluster;vanT	glycopeptide antibiotic	antibiotic target alteration
CJQ_1_03914	555	303	539	42.7	16.04	AAM15533.1	399	151	386	59.15	22.21	AAM15533.1 ARO:3003688 PvrR [Pseudomonas aeruginosa]	134	0	37.553	237	147	PvrR	PvrR is a response regulator that controls the conversion between antibiotic-resistant and antibiotic-susceptible forms of Pseudomonas aeruginosa biofilms through porin deletion/gene absence	phenotypic variant regulator	aminoglycoside antibiotic	resistance by absence
CJQ_1_03915	462	8	462	98.48	33.19	AAG04750.1	477	17	471	95.39	32.14	AAG04750.1 ARO:3004077 PmpM [Pseudomonas aeruginosa PAO1]	207	0	33.696	460	295	PmpM	PmpM is a multidrug efflux pump belonging to the MATE family of Pseudomonas aeruginosa. PmpM is an H+ drug antiporter and is the first reported case of an H+ coupled efflux pump in the MATE family. PmpM confers resistance to fluoroquinolones, fradiomycin, benzalkonium chloride, chlorhexidine gluconate, ethidium bromide, tetraphenylphosphonium chloride (TPPCl), and rhodamine 6G.	multidrug and toxic compound extrusion (MATE) transporter	aminoglycoside antibiotic;benzalkonium chloride;fluoroquinolone antibiotic	antibiotic efflux
CJQ_1_03916	308	7	277	87.99	24.17	CAA79966.1	295	6	269	89.49	24.59	CAA79966.1 ARO:3003665 NmcR [Enterobacter cloacae]	90.9	0	27.473	273	187	NmcR	NmcR is a homolog of the LysR regulator found in Enterobacter cloacae that contribute to the regulation of NmcA beta-lactamase	NmcA beta-lactamase	carbapenem;cephalosporin;cephamycin;penam	antibiotic inactivation
CJQ_1_03917	632	289	390	16.14	4.86	AAG05187.1	428	141	242	23.83	7.17	AAG05187.1 ARO:3005067 ParS [Pseudomonas aeruginosa PAO1]	46.6	4.55e-06	30.097	103	70	ParS	ParS is the sensor component of the two-component ParRS system. Alongside its counterpart ParR, it confers resistance to polycationic antibiotics though regulation of efflux pumps and porins.	Outer Membrane Porin (Opr);resistance-nodulation-cell division (RND) antibiotic efflux pump	acridine dye;aminoglycoside antibiotic;carbapenem;cephalosporin;cephamycin;disinfecting agents and intercalating dyes;fluoroquinolone antibiotic;macrolide antibiotic;monobactam;penam;penem;phenicol antibiotic;tetracycline antibiotic	antibiotic efflux;reduced permeability to antibiotic
CJQ_1_03919	296	9	292	95.95	30.98	CAA79966.1	295	7	286	94.92	30.65	CAA79966.1 ARO:3003665 NmcR [Enterobacter cloacae]	129	2.59e-36	32.292	288	183	NmcR	NmcR is a homolog of the LysR regulator found in Enterobacter cloacae that contribute to the regulation of NmcA beta-lactamase	NmcA beta-lactamase	carbapenem;cephalosporin;cephamycin;penam	antibiotic inactivation
CJQ_1_03940	406	92	403	76.85	26.82	CCP45025.1	416	102	416	75.72	26.43	CCP45025.1 ARO:3003463 Mycobacterium tuberculosis kasA mutant conferring resistance to isoniazid [Mycobacterium tuberculosis H37Rv]	174	0	34.906	318	198	Mycobacterium tuberculosis kasA mutant conferring resistance to isoniazid	Specific mutations on the Mycobacterium tuberculosis kasA gene resulting in lowered affinity of isoniazid, resulting in resistance	antibiotic resistant kasA	isoniazid;triclosan	antibiotic target alteration
CJQ_1_03942	643	239	619	59.25	20.62	AAC75429.1	1197	686	1061	31.41	10.93	AAC75429.1 ARO:3000833 evgS [Escherichia coli str. K-12 substr. MG1655]	202	0	34.805	385	238	evgS	EvgS is a sensor protein that phosphorylates the regulatory protein EvgA. evgS corresponds to 1 locus in Pseudomonas aeruginosa PAO1 and 1 locus in Pseudomonas aeruginosa LESB58.	major facilitator superfamily (MFS) antibiotic efflux pump;resistance-nodulation-cell division (RND) antibiotic efflux pump	fluoroquinolone antibiotic;macrolide antibiotic;penam;tetracycline antibiotic	antibiotic efflux
CJQ_1_03957	884	642	872	26.13	8.53	CAG39047	608	361	597	38.98	12.73	CAG39047 ARO:3003794 Staphylococcus aureus walK with mutation conferring daptomycin resistance [Staphylococcus aureus subsp. aureus MRSA252]	119	0	32.645	242	147	Staphylococcus aureus walK with mutation conferring resistance to daptomycin	walK is the histidine kinase sensor of a two-component regulatory system controlling peptidoglycan metabolism through regulation of the expression of most of the peptidoglycan hydrolase genes. Mutations in the gene have been found that confer daptomycin resistance.	daptomycin resistant walK	peptide antibiotic	antibiotic target alteration
CJQ_1_03958	231	5	227	96.54	48.92	AAC73788.1	225	2	224	99.11	50.22	AAC73788.1 ARO:3003841 kdpE [Escherichia coli str. K-12 substr. MG1655]	228	1.84e-76	50.673	223	110	kdpE	kdpE is a transcriptional activator that is part of the two-component system KdpD/KdpE that is studied for its regulatory role in potassium transport and has been identified as an adaptive regulator involved in the virulence and intracellular survival of pathogenic bacteria. kdpE regulates a range of virulence loci through direct promoter binding.	kdpDE	aminoglycoside antibiotic	antibiotic efflux
CJQ_1_03968	206	1	99	48.06	16.02	AAG05408.1	210	1	94	44.76	14.92	AAG05408.1 ARO:3003709 mexZ [Pseudomonas aeruginosa PAO1]	43.1	3.49e-06	33.333	99	61	MexZ	MexZ is a transcriptional regulator that downregulates the mexXY multidrug transporter operon, which confers to aminoglycoside resistance on Pseudomonas aeruginosa.	resistance-nodulation-cell division (RND) antibiotic efflux pump	acridine dye;aminoglycoside antibiotic;carbapenem;cephalosporin;cephamycin;disinfecting agents and intercalating dyes;fluoroquinolone antibiotic;macrolide antibiotic;penam;phenicol antibiotic;tetracycline antibiotic	antibiotic efflux
CJQ_1_03974	319	2	316	98.75	23.18	AWN09461.1	386	30	320	75.39	17.7	AWN09461.1 ARO:3004571 PNGM-1 [uncultured bacterium]	52.8	1.23e-08	23.476	328	201	PNGM-1	PNGM-1 is a subclass B3 metallo-beta-lactamase first identified from a deep-sea sediment meta-genome. PNGM-1 is shown to reduce susceptibility to extended- and broad-spectrum cephalosporins, carbapenems, and penicillins. PNGM-1 is a novel metallo-beta-lactamase which predates the current antibiotic era.	PNGM beta-lactamase	carbapenem;cephalosporin;penam	antibiotic inactivation
CJQ_1_03981	142	41	123	58.45	17.54	AAB53445.1	180	68	157	50	15	AAB53445.1 ARO:3002897 SAT-4 [Campylobacter coli]	45.8	1.31e-07	30	90	56	SAT-4	SAT-4 is a plasmid-mediated streptothricin acetyltransferase and streptothricin (a nucleoside antibiotic) resistant determinant. Originally described from a Campylobacter coli BE/G4 plasmid gene sequence by Jacob et al, 1994.	streptothricin acetyltransferase (SAT)	nucleoside antibiotic	antibiotic inactivation
CJQ_1_04018	301	9	258	83.06	23.64	ALH22601.1	337	1	253	75.07	21.36	ALH22601.1 ARO:3000620 adeL [Acinetobacter baumannii]	85.9	0	28.458	253	178	adeL	AdeL is a regulator of AdeFGH in Acinetobacter baumannii. AdeL mutations are associated with AdeFGH overexpression and multidrug resistance.	resistance-nodulation-cell division (RND) antibiotic efflux pump	fluoroquinolone antibiotic;tetracycline antibiotic	antibiotic efflux
CJQ_1_04026	255	7	253	96.86	33.33	AAC74177.1	244	1	241	98.77	33.99	AAC74177.1 ARO:3004049 antibiotic resistant fabG [Escherichia coli str. K-12 substr. MG1655]	133	0	34.413	247	156	Escherichia coli fabG mutations conferring resistance to triclosan	fabG is a 3-oxoacyl-acyl carrier protein reductase involved in lipid metabolism and fatty acid biosynthesis.The bacterial biocide Triclosan blocks the final reduction step in fatty acid elongation, inhibiting biosynthesis. Point mutations in fabG can confer resistance to Triclosan.	antibiotic resistant fabG	triclosan	antibiotic target alteration
CJQ_1_04027	355	56	261	58.03	13.54	BAA03776.1	301	46	243	65.78	15.35	BAA03776.1 ARO:3000316 mphA [Escherichia coli]	43.9	8.05e-06	23.333	210	145	mphA	The mphA gene encodes for resistance enzyme MPH(2')-I which preferentially inactivate 14-membered macrolides (e.g.erythromycin, telithromycin, roxithromycin) over 16-membered macrolides (e.g.tylosin, spiramycin). It phosphorylates macrolides at 2'-OH hydroxyl of desosamine sugar of macrolides in a GTP-dependent manner.	macrolide phosphotransferase (MPH)	macrolide antibiotic	antibiotic inactivation
CJQ_1_04035	273	36	221	68.13	19.21	AAK76136.1	588	365	545	30.78	8.68	AAK76136.1 ARO:3000025 patB [Streptococcus pneumoniae TIGR4]	81.6	2.38e-18	28.191	188	126	patB	PatB is an ABC transporter of Streptococcus pneumoniae that interacts with PatA to confer fluoroquinolone resistance..	ATP-binding cassette (ABC) antibiotic efflux pump	fluoroquinolone antibiotic	antibiotic efflux
CJQ_1_04041	408	1	370	90.69	25.6	AAB36568.1	436	1	374	85.78	24.22	AAB36568.1 ARO:3002700 cmlv [Streptomyces venezuelae ATCC 10712]	102	0	28.232	379	258	cmlv	cmlv is a chromosome-encoded chloramphenicol phoshotransferase that is found in Streptomyces venezuelae	chloramphenicol phosphotransferase	phenicol antibiotic	antibiotic inactivation
CJQ_1_04045	305	3	108	34.75	11.69	CAA79966.1	295	5	110	35.93	12.09	CAA79966.1 ARO:3003665 NmcR [Enterobacter cloacae]	55.5	1.23e-09	33.645	107	69	NmcR	NmcR is a homolog of the LysR regulator found in Enterobacter cloacae that contribute to the regulation of NmcA beta-lactamase	NmcA beta-lactamase	carbapenem;cephalosporin;cephamycin;penam	antibiotic inactivation
CJQ_1_04049	500	24	447	84.8	28.46	ABO11759.2	429	5	425	98.14	32.94	ABO11759.2 ARO:3004573 Acinetobacter baumannii AbaF [Acinetobacter baumannii ATCC 17978]	249	1.13e-78	33.565	432	268	Acinetobacter baumannii AbaF	Expression of abaF in E. coli resulted in increased resistance to fosfomycin.	major facilitator superfamily (MFS) antibiotic efflux pump	fosfomycin	antibiotic efflux
CJQ_1_04052	226	4	222	96.9	37.61	AAG06465.1	223	5	220	96.86	37.59	AAG06465.1 ARO:3005063 cprR [Pseudomonas aeruginosa PAO1]	146	0	38.813	219	131	cprR	cprR is one part of a two-component regulatory system. It with its counterpart cprS induce the Arn operon to confer resistance to peptide antibiotics.	pmr phosphoethanolamine transferase	peptide antibiotic	antibiotic efflux;antibiotic target alteration
CJQ_1_04053	463	188	458	58.53	17.88	BAB38260.1	457	188	453	58.21	17.78	BAB38260.1 ARO:3000830 cpxA [Escherichia coli O157:H7 str. Sakai]	112	0	30.545	275	178	cpxA	CpxA is a membrane-localized sensor kinase that is activated by envelope stress. It starts a kinase cascade that activates CpxR, which promotes efflux complex expression.	resistance-nodulation-cell division (RND) antibiotic efflux pump	aminocoumarin antibiotic;aminoglycoside antibiotic	antibiotic efflux
CJQ_1_04056	302	34	296	87.09	29.03	AAG05880.1	347	80	337	74.35	24.78	AAG05880.1 ARO:3000814 MexT [Pseudomonas aeruginosa PAO1]	99.8	0	33.333	264	169	MexT	MexT is a LysR-type transcriptional activator that positively regulates the expression of MexEF-OprN, OprD, and MexS.	resistance-nodulation-cell division (RND) antibiotic efflux pump	diaminopyrimidine antibiotic;fluoroquinolone antibiotic;phenicol antibiotic	antibiotic efflux
CJQ_1_04066	528	16	520	95.64	29.47	AKA86814	655	35	547	78.32	24.13	AKA86814 ARO:3003746 optrA [Enterococcus faecalis]	283	0	30.814	516	343	optrA	OptrA is a member of the ABC-F protein subfamily that confers resistance to oxazolidinones. The gene encoding the protein was originally isolated from a plasmid in Enterococcus faecalis and Enterococcus faecium.	ABC-F ATP-binding cassette ribosomal protection protein	lincosamide antibiotic;macrolide antibiotic;oxazolidinone antibiotic;phenicol antibiotic;pleuromutilin antibiotic;streptogramin antibiotic;tetracycline antibiotic	antibiotic target protection
CJQ_1_04075	436	63	293	52.98	14.91	ALV80601.1	402	64	287	55.72	15.68	ALV80601.1 ARO:3003801 bcr-1 [Pseudomonas aeruginosa]	62	2.75e-11	28.139	231	159	bcr-1	Transmembrane protein which expels bicyclomycin from the cell, leading to bicyclomycin resistance. Identified in Pseudomonas aeruginosa strains responsible for outbreaks in Brazil, often appearing with blaSPM-1, another bicyclomycin resistance gene	major facilitator superfamily (MFS) antibiotic efflux pump	bicyclomycin	antibiotic efflux
CJQ_1_04076	320	6	124	37.19	9.37	ALH22601.1	337	1	119	35.31	8.9	ALH22601.1 ARO:3000620 adeL [Acinetobacter baumannii]	52.8	1.16e-08	25.21	119	89	adeL	AdeL is a regulator of AdeFGH in Acinetobacter baumannii. AdeL mutations are associated with AdeFGH overexpression and multidrug resistance.	resistance-nodulation-cell division (RND) antibiotic efflux pump	fluoroquinolone antibiotic;tetracycline antibiotic	antibiotic efflux
CJQ_1_04079	299	12	297	95.65	31.13	AAG05880.1	347	56	342	82.71	26.92	AAG05880.1 ARO:3000814 MexT [Pseudomonas aeruginosa PAO1]	106	0	32.542	295	182	MexT	MexT is a LysR-type transcriptional activator that positively regulates the expression of MexEF-OprN, OprD, and MexS.	resistance-nodulation-cell division (RND) antibiotic efflux pump	diaminopyrimidine antibiotic;fluoroquinolone antibiotic;phenicol antibiotic	antibiotic efflux
CJQ_1_04087	387	164	378	55.56	14.65	AAR84673.1	365	143	360	59.73	15.75	AAR84673.1 ARO:3002936 vanSF [Paenibacillus popilliae ATCC 14706]	76.3	0	26.364	220	155	vanSF	vanSF is a vanS variant found in the vanF gene cluster	glycopeptide resistance gene cluster;vanS	glycopeptide antibiotic	antibiotic target alteration
CJQ_1_04098	269	171	267	36.06	10.67	AAC77032.1	107	7	104	91.59	27.1	AAC77032.1 ARO:3003511 Escherichia coli soxS with mutation conferring antibiotic resistance [Escherichia coli str. K-12 substr. MG1655]	48.5	2.36e-08	29.592	98	68	Escherichia coli soxS with mutation conferring antibiotic resistance	SoxS is a global regulator that up-regulates the expression of AcrAB efflux genes. It also reduces OmpF expression to decrease cell membrane permeability.	ATP-binding cassette (ABC) antibiotic efflux pump;General Bacterial Porin with reduced permeability to beta-lactams;major facilitator superfamily (MFS) antibiotic efflux pump;resistance-nodulation-cell division (RND) antibiotic efflux pump	carbapenem;cephalosporin;cephamycin;fluoroquinolone antibiotic;glycylcycline;monobactam;penam;penem;phenicol antibiotic;rifamycin antibiotic;tetracycline antibiotic;triclosan	antibiotic efflux;antibiotic target alteration;reduced permeability to antibiotic
CJQ_1_04102	256	1	253	98.83	33.46	AAC74177.1	244	1	241	98.77	33.44	AAC74177.1 ARO:3004049 antibiotic resistant fabG [Escherichia coli str. K-12 substr. MG1655]	130	0	33.858	254	154	Escherichia coli fabG mutations conferring resistance to triclosan	fabG is a 3-oxoacyl-acyl carrier protein reductase involved in lipid metabolism and fatty acid biosynthesis.The bacterial biocide Triclosan blocks the final reduction step in fatty acid elongation, inhibiting biosynthesis. Point mutations in fabG can confer resistance to Triclosan.	antibiotic resistant fabG	triclosan	antibiotic target alteration
CJQ_1_04104	460	158	453	64.35	25.87	AAK37618.1	318	23	309	90.25	36.28	AAK37618.1 ARO:3005008 Txr [Vibrio harveyi]	224	0	40.199	301	161	TxR	TxR is a putative transcription regulator that plays a role in conferring tetracycline resistance. It is required for proper functioning of Tet35.	ATP-binding cassette (ABC) antibiotic efflux pump	tetracycline antibiotic	antibiotic efflux
CJQ_1_04113	1041	1	1009	96.93	54.03	AAL14440.1	1035	1	1006	97.2	54.18	AAL14440.1 ARO:3000775 adeB [Acinetobacter baumannii]	1163	0	55.743	1010	442	adeB	AdeB is the multidrug transporter of the adeABC efflux system.	resistance-nodulation-cell division (RND) antibiotic efflux pump	glycylcycline;tetracycline antibiotic	antibiotic efflux
CJQ_1_04114	391	18	380	92.84	46.16	AAB41956.1	387	15	373	92.76	46.13	AAB41956.1 ARO:3000800 MexC [Pseudomonas aeruginosa]	315	0	49.725	364	177	MexC	MexC is the membrane fusion protein of the MexCD-OprJ multidrug efflux complex.	resistance-nodulation-cell division (RND) antibiotic efflux pump	aminocoumarin antibiotic;aminoglycoside antibiotic;cephalosporin;diaminopyrimidine antibiotic;fluoroquinolone antibiotic;macrolide antibiotic;penam;phenicol antibiotic;tetracycline antibiotic	antibiotic efflux
CJQ_1_04115	233	1	232	99.57	51.5	AAG05188.1	235	6	234	97.45	50.4	AAG05188.1 ARO:3005068 ParR [Pseudomonas aeruginosa PAO1]	221	0	51.724	232	109	ParR	ParR is a component of the two-component sensor ParRS. Alongside its counterpart ParS, it confers resistance to polycationic antibiotics through the regulation of efflux components and porins.	Outer Membrane Porin (Opr);resistance-nodulation-cell division (RND) antibiotic efflux pump	acridine dye;aminoglycoside antibiotic;carbapenem;cephalosporin;cephamycin;disinfecting agents and intercalating dyes;fluoroquinolone antibiotic;macrolide antibiotic;monobactam;penam;penem;phenicol antibiotic;tetracycline antibiotic	antibiotic efflux;reduced permeability to antibiotic
CJQ_1_04116	432	21	427	94.21	35.36	AAG05187.1	428	20	422	94.16	35.34	AAG05187.1 ARO:3005067 ParS [Pseudomonas aeruginosa PAO1]	233	0	37.53	413	242	ParS	ParS is the sensor component of the two-component ParRS system. Alongside its counterpart ParR, it confers resistance to polycationic antibiotics though regulation of efflux pumps and porins.	Outer Membrane Porin (Opr);resistance-nodulation-cell division (RND) antibiotic efflux pump	acridine dye;aminoglycoside antibiotic;carbapenem;cephalosporin;cephamycin;disinfecting agents and intercalating dyes;fluoroquinolone antibiotic;macrolide antibiotic;monobactam;penam;penem;phenicol antibiotic;tetracycline antibiotic	antibiotic efflux;reduced permeability to antibiotic
CJQ_1_04126	468	245	468	47.86	12.37	BAB38260.1	457	242	456	47.05	12.16	BAB38260.1 ARO:3000830 cpxA [Escherichia coli O157:H7 str. Sakai]	58.9	3.44e-10	25.847	236	142	cpxA	CpxA is a membrane-localized sensor kinase that is activated by envelope stress. It starts a kinase cascade that activates CpxR, which promotes efflux complex expression.	resistance-nodulation-cell division (RND) antibiotic efflux pump	aminocoumarin antibiotic;aminoglycoside antibiotic	antibiotic efflux
CJQ_1_04127	210	47	195	70.95	21.24	BAB36671.1	204	46	198	75	22.45	BAB36671.1 ARO:3000832 evgA [Escherichia coli O157:H7 str. Sakai]	70.5	1e-15	29.936	157	98	evgA	EvgA, when phosphorylated, is a positive regulator for efflux protein complexes emrKY and mdtEF. While usually phosphorylated in a EvgS dependent manner, it can be phosphorylated in the absence of EvgS when overexpressed.	major facilitator superfamily (MFS) antibiotic efflux pump;resistance-nodulation-cell division (RND) antibiotic efflux pump	fluoroquinolone antibiotic;macrolide antibiotic;penam;tetracycline antibiotic	antibiotic efflux
CJQ_1_04128	157	14	142	82.17	32.23	AAC74603.2	144	14	143	90.28	35.42	AAC74603.2 ARO:3003378 Escherichia coli marR mutant conferring antibiotic resistance [Escherichia coli str. K-12 substr. MG1655]	75.1	0	39.231	130	78	Escherichia coli marR mutant conferring antibiotic resistance	MarR is a repressor of the mar operon marRAB, thus regulating the expression of marA, the activator of multidrug efflux pump AcrAB.	resistance-nodulation-cell division (RND) antibiotic efflux pump	cephalosporin;fluoroquinolone antibiotic;glycylcycline;penam;phenicol antibiotic;rifamycin antibiotic;tetracycline antibiotic;triclosan	antibiotic efflux;antibiotic target alteration
CJQ_1_04129	397	1	389	97.98	43.32	BAA16547.1	390	1	389	99.74	44.1	BAA16547.1 ARO:3000027 emrA [Escherichia coli str. K-12 substr. W3110]	321	0	44.216	389	217	emrA	EmrA is a membrane fusion protein, providing an efflux pathway with EmrB and TolC between the inner and outer membranes of E. coli, a Gram-negative bacterium.	major facilitator superfamily (MFS) antibiotic efflux pump	fluoroquinolone antibiotic	antibiotic efflux
CJQ_1_04130	511	14	500	95.3	48.14	AAC75733.1	512	12	502	95.9	48.44	AAC75733.1 ARO:3000074 emrB [Escherichia coli str. K-12 substr. MG1655]	487	0	50.509	491	239	emrB	emrB is a translocase in the emrB -TolC efflux protein in E. coli. It recognizes substrates including carbonyl cyanide m-chlorophenylhydrazone (CCCP), nalidixic acid, and thioloactomycin.	major facilitator superfamily (MFS) antibiotic efflux pump	fluoroquinolone antibiotic	antibiotic efflux
CJQ_1_04131	689	258	646	56.46	14.35	AAC75429.1	1197	663	1039	31.5	8.01	AAC75429.1 ARO:3000833 evgS [Escherichia coli str. K-12 substr. MG1655]	67.4	2.83e-12	25.424	413	248	evgS	EvgS is a sensor protein that phosphorylates the regulatory protein EvgA. evgS corresponds to 1 locus in Pseudomonas aeruginosa PAO1 and 1 locus in Pseudomonas aeruginosa LESB58.	major facilitator superfamily (MFS) antibiotic efflux pump;resistance-nodulation-cell division (RND) antibiotic efflux pump	fluoroquinolone antibiotic;macrolide antibiotic;penam;tetracycline antibiotic	antibiotic efflux
CJQ_1_04137	132	7	74	51.52	15.45	AAL19308.1	154	2	71	45.45	13.64	AAL19308.1 ARO:3000504 golS [Salmonella enterica subsp. enterica serovar Typhimurium str. LT2]	40.4	6.72e-06	30	70	47	golS	GolS is a regulator activated by the presence of golD, and promotes the expression of the MdsABC efflux pump.	resistance-nodulation-cell division (RND) antibiotic efflux pump	carbapenem;cephalosporin;cephamycin;monobactam;penam;penem;phenicol antibiotic	antibiotic efflux
CJQ_1_04138	292	187	286	34.25	9.25	AAL23089.1	107	5	104	93.46	25.23	AAL23089.1 ARO:3003383 Salmonella serovars soxS with mutation conferring antibiotic resistance [Salmonella enterica subsp. enterica serovar Typhimurium str. LT2]	43.1	1.67e-06	27	100	73	Salmonella serovars soxS with mutation conferring antibiotic resistance	SoxS is a global regulator that up-regulates the expression of AcrAB efflux genes. It also reduces OmpF expression to decrease cell membrane permeability.	ATP-binding cassette (ABC) antibiotic efflux pump;General Bacterial Porin with reduced permeability to beta-lactams;major facilitator superfamily (MFS) antibiotic efflux pump;resistance-nodulation-cell division (RND) antibiotic efflux pump	carbapenem;cephalosporin;cephamycin;fluoroquinolone antibiotic;glycylcycline;monobactam;penam;penem;phenicol antibiotic;rifamycin antibiotic;tetracycline antibiotic;triclosan	antibiotic efflux;antibiotic target alteration;reduced permeability to antibiotic
CJQ_1_04141	293	9	133	42.66	12.29	CAA79966.1	295	2	126	42.37	12.2	CAA79966.1 ARO:3003665 NmcR [Enterobacter cloacae]	50.8	3.34e-08	28.8	125	89	NmcR	NmcR is a homolog of the LysR regulator found in Enterobacter cloacae that contribute to the regulation of NmcA beta-lactamase	NmcA beta-lactamase	carbapenem;cephalosporin;cephamycin;penam	antibiotic inactivation
CJQ_1_04145	227	13	85	32.16	10.13	AAG07108.1	213	9	73	30.52	9.61	AAG07108.1 ARO:3000818 nalC [Pseudomonas aeruginosa PAO1]	43.5	3.28e-06	31.507	73	42	nalC	NalC is a repressor of PA3720-PA3719, which are positive regulators of MexAB-OprM. Thus, nalC mutants confer multidrug resistance.	resistance-nodulation-cell division (RND) antibiotic efflux pump	aminocoumarin antibiotic;carbapenem;cephalosporin;cephamycin;diaminopyrimidine antibiotic;fluoroquinolone antibiotic;macrolide antibiotic;monobactam;penam;penem;peptide antibiotic;phenicol antibiotic;sulfonamide antibiotic;tetracycline antibiotic	antibiotic efflux
CJQ_1_04146	335	236	327	27.46	8.96	AFK13828.1	124	21	112	74.19	24.19	AFK13828.1 ARO:3000823 ramA [Enterobacter cloacae]	57	3.76e-11	32.609	92	62	ramA	RamA (resistance antibiotic multiple) is a positive regulator of AcrAB-TolC and leads to high level multidrug resistance in Klebsiella pneumoniae, Salmonella enterica, and Enterobacter aerugenes, increasing the expression of both the mar operon as well as AcrAB. RamA also decreases OmpF expression.	General Bacterial Porin with reduced permeability to beta-lactams;resistance-nodulation-cell division (RND) antibiotic efflux pump	carbapenem;cephalosporin;cephamycin;fluoroquinolone antibiotic;glycylcycline;monobactam;penam;penem;phenicol antibiotic;rifamycin antibiotic;tetracycline antibiotic;triclosan	antibiotic efflux;reduced permeability to antibiotic
CJQ_1_04161	441	138	440	68.71	32.2	AAK37618.1	318	23	316	92.45	43.33	AAK37618.1 ARO:3005008 Txr [Vibrio harveyi]	258	0	46.865	303	152	TxR	TxR is a putative transcription regulator that plays a role in conferring tetracycline resistance. It is required for proper functioning of Tet35.	ATP-binding cassette (ABC) antibiotic efflux pump	tetracycline antibiotic	antibiotic efflux
CJQ_1_04166	310	7	290	91.61	29.06	ALH22601.1	337	1	287	85.16	27.02	ALH22601.1 ARO:3000620 adeL [Acinetobacter baumannii]	127	0	31.724	290	189	adeL	AdeL is a regulator of AdeFGH in Acinetobacter baumannii. AdeL mutations are associated with AdeFGH overexpression and multidrug resistance.	resistance-nodulation-cell division (RND) antibiotic efflux pump	fluoroquinolone antibiotic;tetracycline antibiotic	antibiotic efflux
CJQ_1_04194	377	26	373	92.31	31.21	BAA16547.1	390	10	347	86.67	29.3	BAA16547.1 ARO:3000027 emrA [Escherichia coli str. K-12 substr. W3110]	152	0	33.807	352	215	emrA	EmrA is a membrane fusion protein, providing an efflux pathway with EmrB and TolC between the inner and outer membranes of E. coli, a Gram-negative bacterium.	major facilitator superfamily (MFS) antibiotic efflux pump	fluoroquinolone antibiotic	antibiotic efflux
CJQ_1_04196	838	706	805	11.93	4.42	AAV85982.1	644	123	218	14.91	5.52	AAV85982.1 ARO:3000535 macB [Neisseria gonorrhoeae]	60.5	3.25e-10	37	100	59	macB	MacB is an ATP-binding cassette (ABC) transporter that exports macrolides with 14- or 15- membered lactones. It forms an antibiotic efflux complex with MacA and TolC. macB corresponds to 1 locus in Pseudomonas aeruginosa PAO1 and 1 locus in Pseudomonas aeruginosa LESB58.	ATP-binding cassette (ABC) antibiotic efflux pump	macrolide antibiotic	antibiotic efflux
CJQ_1_04199	830	707	828	14.7	6.7	CDO13836.1	374	243	364	32.62	14.87	CDO13836.1 ARO:3005044 OmpA [Klebsiella pneumoniae]	105	0	45.6	125	62	OmpA	OmpA is a porin that confers resistance to beta-lactam antibiotics.	General Bacterial Porin with reduced permeability to beta-lactams	carbapenem;cephalosporin;cephamycin;monobactam;penam;penem	reduced permeability to antibiotic
CJQ_1_04248	420	9	416	97.14	32.84	AAG04347.1	443	20	438	94.58	31.97	AAG04347.1 ARO:3003686 Pseudomonas aeruginosa oprD with mutation conferring resistance to imipenem [Pseudomonas aeruginosa PAO1]	228	0	33.806	423	261	Pseudomonas aeruginosa oprD with mutation conferring resistance to imipenem	oprD is an outer membrane porin which facilitates the uptake of basic amino acids and imipenem in Pseudomonas aeruginosa.	Outer Membrane Porin (Opr)	carbapenem;cephalosporin;cephamycin;monobactam;penam;penem	reduced permeability to antibiotic
CJQ_1_04249	450	27	401	83.33	18.99	ACJ41547.2	434	20	388	85.02	19.37	ACJ41547.2 ARO:3004574 Acinetobacter baumannii AbaQ [Acinetobacter baumannii AB0057]	64.3	6.45e-12	22.785	395	259	Acinetobacter baumannii AbaQ	AbaQ is an MFS transporter mainly involved in the extrusion of quinolone-type drugs in A. baumannii	major facilitator superfamily (MFS) antibiotic efflux pump	fluoroquinolone antibiotic	antibiotic efflux
CJQ_1_04250	290	9	149	48.62	14.68	CAA79966.1	295	13	150	46.78	14.13	CAA79966.1 ARO:3003665 NmcR [Enterobacter cloacae]	51.2	2.35e-08	30.201	149	85	NmcR	NmcR is a homolog of the LysR regulator found in Enterobacter cloacae that contribute to the regulation of NmcA beta-lactamase	NmcA beta-lactamase	carbapenem;cephalosporin;cephamycin;penam	antibiotic inactivation
CJQ_1_04255	335	232	331	29.85	8.96	AFK13828.1	124	19	118	80.65	24.19	AFK13828.1 ARO:3000823 ramA [Enterobacter cloacae]	51.2	4.49e-09	30	100	70	ramA	RamA (resistance antibiotic multiple) is a positive regulator of AcrAB-TolC and leads to high level multidrug resistance in Klebsiella pneumoniae, Salmonella enterica, and Enterobacter aerugenes, increasing the expression of both the mar operon as well as AcrAB. RamA also decreases OmpF expression.	General Bacterial Porin with reduced permeability to beta-lactams;resistance-nodulation-cell division (RND) antibiotic efflux pump	carbapenem;cephalosporin;cephamycin;fluoroquinolone antibiotic;glycylcycline;monobactam;penam;penem;phenicol antibiotic;rifamycin antibiotic;tetracycline antibiotic;triclosan	antibiotic efflux;reduced permeability to antibiotic
CJQ_1_04256	444	23	442	94.59	31.17	ABO11759.2	429	5	425	98.14	32.33	ABO11759.2 ARO:3004573 Acinetobacter baumannii AbaF [Acinetobacter baumannii ATCC 17978]	229	0	32.947	431	268	Acinetobacter baumannii AbaF	Expression of abaF in E. coli resulted in increased resistance to fosfomycin.	major facilitator superfamily (MFS) antibiotic efflux pump	fosfomycin	antibiotic efflux
CJQ_1_04258	752	7	752	99.2	62.51	CCP44675.1	740	20	740	97.43	61.39	CCP44675.1 ARO:3005102 Mycobacterium tuberculosis katG mutations conferring resistance to prothionamide [Mycobacterium tuberculosis H37Rv]	894	0	63.012	757	233	Mycobacterium tuberculosis katG mutations conferring resistance to prothionamide	Mutations in Mycobacterium tuberculosis katG conferring resistance to prothionamide, an analogue of isoniazid	prothionamide resistant katG	prothionamide	antibiotic target alteration
CJQ_1_04259	302	37	299	87.09	56.95	AAG05880.1	347	80	342	75.79	49.57	AAG05880.1 ARO:3000814 MexT [Pseudomonas aeruginosa PAO1]	331	0	65.399	263	91	MexT	MexT is a LysR-type transcriptional activator that positively regulates the expression of MexEF-OprN, OprD, and MexS.	resistance-nodulation-cell division (RND) antibiotic efflux pump	diaminopyrimidine antibiotic;fluoroquinolone antibiotic;phenicol antibiotic	antibiotic efflux
CJQ_1_04263	496	35	488	91.53	56.98	AAG05913.1	498	18	477	92.37	57.51	AAG05913.1 ARO:3004072 OpmB [Pseudomonas aeruginosa PAO1]	567	0	62.256	461	166	OpmB	OpmB is an outer membrane efflux protein in Pseudomonas aeruginosa that shows functional cooperation with MuxABC, to form the efflux pump system MuxABC-OpmB.	resistance-nodulation-cell division (RND) antibiotic efflux pump	aminocoumarin antibiotic;macrolide antibiotic;monobactam;tetracycline antibiotic	antibiotic efflux
CJQ_1_04264	1035	1	1035	100	59.42	AAG05914	1036	1	1036	100	59.42	AAG05914 ARO:3004075 MuxC [Pseudomonas aeruginosa PAO1]	1115	0	59.423	1040	413	MuxC	MuxC is one of the two necessary RND components of the MuxABC-OpmB efflux pumps system in Pseudomonas aeruginosa.	resistance-nodulation-cell division (RND) antibiotic efflux pump	aminocoumarin antibiotic;macrolide antibiotic;monobactam;tetracycline antibiotic	antibiotic efflux
CJQ_1_04265	1032	1	1021	98.93	71.41	AAG05915.1	1043	1	1020	97.79	70.59	AAG05915.1 ARO:3004074 MuxB [Pseudomonas aeruginosa PAO1]	1422	0	72.184	1021	283	MuxB	MuxB is one of the two necessary RND components in the Pseudomonas aeruginosa efflux pump system MuxABC-OpmB.	resistance-nodulation-cell division (RND) antibiotic efflux pump	aminocoumarin antibiotic;macrolide antibiotic;monobactam;tetracycline antibiotic	antibiotic efflux
CJQ_1_04266	439	4	420	94.99	51.95	AAG05916.1	426	8	425	98.12	53.67	AAG05916.1 ARO:3004073 MuxA [Pseudomonas aeruginosa PAO1]	421	0	54.695	426	176	MuxA	MuxA is a membrane fusion protein component of the efflux pump system MuxABC-OpmB in Pseudomonas aeruginosa.	resistance-nodulation-cell division (RND) antibiotic efflux pump	aminocoumarin antibiotic;macrolide antibiotic;monobactam;tetracycline antibiotic	antibiotic efflux
CJQ_1_04276	260	20	240	85	31.08	AAV85982.1	644	3	227	34.94	12.77	AAV85982.1 ARO:3000535 macB [Neisseria gonorrhoeae]	143	0	36.564	227	136	macB	MacB is an ATP-binding cassette (ABC) transporter that exports macrolides with 14- or 15- membered lactones. It forms an antibiotic efflux complex with MacA and TolC. macB corresponds to 1 locus in Pseudomonas aeruginosa PAO1 and 1 locus in Pseudomonas aeruginosa LESB58.	ATP-binding cassette (ABC) antibiotic efflux pump	macrolide antibiotic	antibiotic efflux
CJQ_1_04279	454	17	429	90.97	22.21	ACJ41547.2	434	19	422	93.09	22.73	ACJ41547.2 ARO:3004574 Acinetobacter baumannii AbaQ [Acinetobacter baumannii AB0057]	90.5	0	24.413	426	287	Acinetobacter baumannii AbaQ	AbaQ is an MFS transporter mainly involved in the extrusion of quinolone-type drugs in A. baumannii	major facilitator superfamily (MFS) antibiotic efflux pump	fluoroquinolone antibiotic	antibiotic efflux
CJQ_1_04289	137	1	125	91.24	35.04	NP_253005.1	124	1	120	96.77	37.16	NP_253005.1 ARO:3004069 MvaT [Pseudomonas aeruginosa PAO1]	91.7	0	38.4	125	72	MvaT	MvaT, a global regulator of virulence genes in P. aeruginosa, has also shown to be able to repress the expression of the MexEF-OprN pump.	resistance-nodulation-cell division (RND) antibiotic efflux pump	diaminopyrimidine antibiotic;fluoroquinolone antibiotic;phenicol antibiotic	antibiotic efflux
CJQ_1_04290	441	47	236	43.08	11.09	ACJ41547.2	434	27	228	46.54	11.98	ACJ41547.2 ARO:3004574 Acinetobacter baumannii AbaQ [Acinetobacter baumannii AB0057]	67.8	4.55e-13	25.743	202	138	Acinetobacter baumannii AbaQ	AbaQ is an MFS transporter mainly involved in the extrusion of quinolone-type drugs in A. baumannii	major facilitator superfamily (MFS) antibiotic efflux pump	fluoroquinolone antibiotic	antibiotic efflux
CJQ_1_04299	311	12	296	91.64	29.06	ALH22601.1	337	3	285	83.98	26.63	ALH22601.1 ARO:3000620 adeL [Acinetobacter baumannii]	151	0	31.707	287	190	adeL	AdeL is a regulator of AdeFGH in Acinetobacter baumannii. AdeL mutations are associated with AdeFGH overexpression and multidrug resistance.	resistance-nodulation-cell division (RND) antibiotic efflux pump	fluoroquinolone antibiotic;tetracycline antibiotic	antibiotic efflux
CJQ_1_04300	403	5	396	97.27	28.61	AAB36568.1	436	7	407	91.97	27.05	AAB36568.1 ARO:3002700 cmlv [Streptomyces venezuelae ATCC 10712]	115	0	29.412	408	265	cmlv	cmlv is a chromosome-encoded chloramphenicol phoshotransferase that is found in Streptomyces venezuelae	chloramphenicol phosphotransferase	phenicol antibiotic	antibiotic inactivation
CJQ_1_04307	315	36	294	82.22	27.09	AAG05880.1	347	80	337	74.35	24.5	AAG05880.1 ARO:3000814 MexT [Pseudomonas aeruginosa PAO1]	119	0	32.95	261	170	MexT	MexT is a LysR-type transcriptional activator that positively regulates the expression of MexEF-OprN, OprD, and MexS.	resistance-nodulation-cell division (RND) antibiotic efflux pump	diaminopyrimidine antibiotic;fluoroquinolone antibiotic;phenicol antibiotic	antibiotic efflux
CJQ_1_04311	583	90	510	72.21	18.22	SBZ31568.1	541	92	501	75.79	19.12	SBZ31568.1 ARO:3004691 MCR-3.4 [Klebsiella pneumoniae]	110	0	25.229	436	285	MCR-3.4	A plasmid-mediated MCR-3.1 variant	MCR phosphoethanolamine transferase	peptide antibiotic	antibiotic target alteration
CJQ_1_04315	392	10	370	92.09	34.5	AAB36568.1	436	32	394	83.26	31.19	AAB36568.1 ARO:3002700 cmlv [Streptomyces venezuelae ATCC 10712]	207	0	37.466	363	225	cmlv	cmlv is a chromosome-encoded chloramphenicol phoshotransferase that is found in Streptomyces venezuelae	chloramphenicol phosphotransferase	phenicol antibiotic	antibiotic inactivation
CJQ_1_04316	302	10	301	96.69	35.16	ALH22601.1	337	1	296	87.83	31.94	ALH22601.1 ARO:3000620 adeL [Acinetobacter baumannii]	166	0	36.364	297	183	adeL	AdeL is a regulator of AdeFGH in Acinetobacter baumannii. AdeL mutations are associated with AdeFGH overexpression and multidrug resistance.	resistance-nodulation-cell division (RND) antibiotic efflux pump	fluoroquinolone antibiotic;tetracycline antibiotic	antibiotic efflux
CJQ_1_04317	325	26	287	80.62	23.61	AAB05626.1	323	26	296	83.9	24.57	AAB05626.1 ARO:3002943 vanHB [Enterococcus faecalis]	97.1	0	29.286	280	171	vanHB	vanHB is a vanH variant in the vanB gene cluster	glycopeptide resistance gene cluster;vanH	glycopeptide antibiotic	antibiotic target alteration
CJQ_1_04340	163	52	163	68.71	22.35	CDO13836.1	374	243	365	32.89	10.7	CDO13836.1 ARO:3005044 OmpA [Klebsiella pneumoniae]	55.8	1.25e-10	32.52	123	72	OmpA	OmpA is a porin that confers resistance to beta-lactam antibiotics.	General Bacterial Porin with reduced permeability to beta-lactams	carbapenem;cephalosporin;cephamycin;monobactam;penam;penem	reduced permeability to antibiotic
CJQ_1_04345	310	187	300	36.77	14.83	AQA08261.1	267	142	260	44.57	17.98	AQA08261.1 ARO:3004097 Streptococcus mitis CdsA with mutation conferring daptomycin resistance [Streptococcus oralis]	93.2	0	40.336	119	66	Streptococcus mitis CdsA with mutation conferring daptomycin resistance	CdsA is a phosphatidate cytidylyltransferase which plays a role in the production of membrane phosphatidylglycerol and cardiolipin.	daptomycin resistant CdsA	peptide antibiotic	antibiotic target alteration
CJQ_1_04351	300	8	142	45	12.81	CAA79966.1	295	10	140	44.41	12.64	CAA79966.1 ARO:3003665 NmcR [Enterobacter cloacae]	46.6	7.92e-07	28.467	137	90	NmcR	NmcR is a homolog of the LysR regulator found in Enterobacter cloacae that contribute to the regulation of NmcA beta-lactamase	NmcA beta-lactamase	carbapenem;cephalosporin;cephamycin;penam	antibiotic inactivation
CJQ_1_04355	298	8	294	96.31	31.11	ALH22601.1	337	1	290	86.05	27.8	ALH22601.1 ARO:3000620 adeL [Acinetobacter baumannii]	153	0	32.302	291	192	adeL	AdeL is a regulator of AdeFGH in Acinetobacter baumannii. AdeL mutations are associated with AdeFGH overexpression and multidrug resistance.	resistance-nodulation-cell division (RND) antibiotic efflux pump	fluoroquinolone antibiotic;tetracycline antibiotic	antibiotic efflux
CJQ_1_04362	301	7	295	96.01	28.8	ALH22601.1	337	1	290	86.05	25.82	ALH22601.1 ARO:3000620 adeL [Acinetobacter baumannii]	135	0	30	300	189	adeL	AdeL is a regulator of AdeFGH in Acinetobacter baumannii. AdeL mutations are associated with AdeFGH overexpression and multidrug resistance.	resistance-nodulation-cell division (RND) antibiotic efflux pump	fluoroquinolone antibiotic;tetracycline antibiotic	antibiotic efflux
CJQ_1_04365	406	12	344	82.02	20.62	ACJ63262.1	409	8	346	82.89	20.84	ACJ63262.1 ARO:3003107 mefB [Escherichia coli]	67	5e-13	25.145	346	239	mef(B)	mef(B) is a macrolide efflux gene located in the vicinity of sul3 in Escherichia coli. There is also a mefB found in Streptococcus agalactiae that confers resistance to macrolides.	major facilitator superfamily (MFS) antibiotic efflux pump	macrolide antibiotic	antibiotic efflux
CJQ_1_04370	235	1	235	100	29.11	AAL20862.1	240	6	240	97.92	28.51	AAL20862.1 ARO:3000826 sdiA [Salmonella enterica subsp. enterica serovar Typhimurium str. LT2]	100	0	29.114	237	164	sdiA	SdiA is a cell division regulator that is also a positive regulator of AcrAB only when it's expressed from a plasmid. When the sdiA gene is on the chromosome, it has no effect on expression of acrAB	resistance-nodulation-cell division (RND) antibiotic efflux pump	cephalosporin;fluoroquinolone antibiotic;glycylcycline;penam;phenicol antibiotic;rifamycin antibiotic;tetracycline antibiotic;triclosan	antibiotic efflux
CJQ_1_04385	245	21	240	89.8	20.41	AAC74177.1	244	9	243	96.31	21.89	AAC74177.1 ARO:3004049 antibiotic resistant fabG [Escherichia coli str. K-12 substr. MG1655]	46.6	4.95e-07	22.727	242	158	Escherichia coli fabG mutations conferring resistance to triclosan	fabG is a 3-oxoacyl-acyl carrier protein reductase involved in lipid metabolism and fatty acid biosynthesis.The bacterial biocide Triclosan blocks the final reduction step in fatty acid elongation, inhibiting biosynthesis. Point mutations in fabG can confer resistance to Triclosan.	antibiotic resistant fabG	triclosan	antibiotic target alteration
CJQ_1_04391	298	6	142	45.97	10.93	ALH22601.1	337	1	143	42.43	10.09	ALH22601.1 ARO:3000620 adeL [Acinetobacter baumannii]	52.8	9.97e-09	23.776	143	103	adeL	AdeL is a regulator of AdeFGH in Acinetobacter baumannii. AdeL mutations are associated with AdeFGH overexpression and multidrug resistance.	resistance-nodulation-cell division (RND) antibiotic efflux pump	fluoroquinolone antibiotic;tetracycline antibiotic	antibiotic efflux
CJQ_1_04395	303	7	194	62.05	21.78	AAC74177.1	244	3	181	73.36	25.75	AAC74177.1 ARO:3004049 antibiotic resistant fabG [Escherichia coli str. K-12 substr. MG1655]	115	0	35.106	188	113	Escherichia coli fabG mutations conferring resistance to triclosan	fabG is a 3-oxoacyl-acyl carrier protein reductase involved in lipid metabolism and fatty acid biosynthesis.The bacterial biocide Triclosan blocks the final reduction step in fatty acid elongation, inhibiting biosynthesis. Point mutations in fabG can confer resistance to Triclosan.	antibiotic resistant fabG	triclosan	antibiotic target alteration
CJQ_1_04407	881	630	879	28.38	7.66	BAB38260.1	457	210	455	53.83	14.53	BAB38260.1 ARO:3000830 cpxA [Escherichia coli O157:H7 str. Sakai]	73.2	3.09e-14	26.996	263	162	cpxA	CpxA is a membrane-localized sensor kinase that is activated by envelope stress. It starts a kinase cascade that activates CpxR, which promotes efflux complex expression.	resistance-nodulation-cell division (RND) antibiotic efflux pump	aminocoumarin antibiotic;aminoglycoside antibiotic	antibiotic efflux
CJQ_1_04416	412	206	369	39.81	9.59	VEG60537.1	731	560	722	22.3	5.37	VEG60537.1 ARO:3004835 Neisseria gonorrhoea pilQ gene conferring resistance to beta-lactam [Neisseria gonorrhoeae]	62.8	2.4e-11	24.096	166	121	Neisseria gonorrhoeae pilQ gene conferring resistance to beta-lactam	PilQ is an important gonococcal outer membrane component, member of secretin protein family, and involved in Type IV pilus formation.	Penicillin-binding protein mutations conferring resistance to beta-lactam antibiotics	carbapenem;cephalosporin;cephamycin;monobactam;penam	antibiotic target alteration
CJQ_1_04419	135	9	113	77.78	24.21	AAL27445.1	229	3	103	44.1	13.73	AAL27445.1 ARO:3002924 vanRE [Enterococcus faecalis]	52.4	7.05e-10	31.132	106	67	vanRE	vanRE is a vanR variant found in the vanE gene cluster	glycopeptide resistance gene cluster;vanR	glycopeptide antibiotic	antibiotic target alteration
CJQ_1_04427	291	192	286	32.65	10.31	AAL23089.1	107	10	104	88.79	28.04	AAL23089.1 ARO:3003383 Salmonella serovars soxS with mutation conferring antibiotic resistance [Salmonella enterica subsp. enterica serovar Typhimurium str. LT2]	63.5	8.7e-14	31.579	95	65	Salmonella serovars soxS with mutation conferring antibiotic resistance	SoxS is a global regulator that up-regulates the expression of AcrAB efflux genes. It also reduces OmpF expression to decrease cell membrane permeability.	ATP-binding cassette (ABC) antibiotic efflux pump;General Bacterial Porin with reduced permeability to beta-lactams;major facilitator superfamily (MFS) antibiotic efflux pump;resistance-nodulation-cell division (RND) antibiotic efflux pump	carbapenem;cephalosporin;cephamycin;fluoroquinolone antibiotic;glycylcycline;monobactam;penam;penem;phenicol antibiotic;rifamycin antibiotic;tetracycline antibiotic;triclosan	antibiotic efflux;antibiotic target alteration;reduced permeability to antibiotic
CJQ_1_04429	324	67	303	73.15	23.44	ACL82960.1	326	76	315	73.62	23.59	ACL82960.1 ARO:3002947 vanHM [Enterococcus faecium]	116	6.45e-31	32.046	259	135	vanHM	vanHM is a vanH variant in the vanM gene cluster	glycopeptide resistance gene cluster;vanH	glycopeptide antibiotic	antibiotic target alteration
CJQ_1_04430	315	7	291	90.48	28.06	ALH22601.1	337	1	285	84.57	26.23	ALH22601.1 ARO:3000620 adeL [Acinetobacter baumannii]	131	1.44e-36	31.01	287	194	adeL	AdeL is a regulator of AdeFGH in Acinetobacter baumannii. AdeL mutations are associated with AdeFGH overexpression and multidrug resistance.	resistance-nodulation-cell division (RND) antibiotic efflux pump	fluoroquinolone antibiotic;tetracycline antibiotic	antibiotic efflux
CJQ_1_04431	509	5	486	94.7	26.18	BAE78082.1	488	2	488	99.8	27.59	BAE78082.1 ARO:3003550 mdtP [Escherichia coli str. K-12 substr. W3110]	178	0	27.642	492	341	mdtP	Multidrug resistance efflux pump. Could be involved in resistance to puromycin, acriflavine and tetraphenylarsonium chloride	major facilitator superfamily (MFS) antibiotic efflux pump	acridine dye;disinfecting agents and intercalating dyes;nucleoside antibiotic	antibiotic efflux
CJQ_1_04432	725	399	550	20.97	5.45	BAE78083.1	683	354	505	22.25	5.78	BAE78083.1 ARO:3003549 mdtO [Escherichia coli str. K-12 substr. W3110]	58.2	1.41e-09	25.974	154	110	mdtO	Multidrug resistance efflux pump. Could be involved in resistance to puromycin, acriflavine and tetraphenylarsonium chloride	major facilitator superfamily (MFS) antibiotic efflux pump	acridine dye;disinfecting agents and intercalating dyes;nucleoside antibiotic	antibiotic efflux
CJQ_1_04434	286	30	279	87.41	24.28	BAE78084.1	343	35	340	89.21	24.78	BAE78084.1 ARO:3003548 mdtN [Escherichia coli str. K-12 substr. W3110]	109	0	27.778	306	165	mdtN	Multidrug resistance efflux pump. Could be involved in resistance to puromycin, acriflavine and tetraphenylarsonium chloride.	major facilitator superfamily (MFS) antibiotic efflux pump	acridine dye;disinfecting agents and intercalating dyes;nucleoside antibiotic	antibiotic efflux
CJQ_1_04440	302	34	294	86.42	23.84	AAG05880.1	347	82	337	73.78	20.35	AAG05880.1 ARO:3000814 MexT [Pseudomonas aeruginosa PAO1]	62.8	5.11e-12	27.586	261	184	MexT	MexT is a LysR-type transcriptional activator that positively regulates the expression of MexEF-OprN, OprD, and MexS.	resistance-nodulation-cell division (RND) antibiotic efflux pump	diaminopyrimidine antibiotic;fluoroquinolone antibiotic;phenicol antibiotic	antibiotic efflux
CJQ_1_04443	261	74	176	39.46	11.77	AAA86871.1	212	65	175	52.36	15.62	AAA86871.1 ARO:3002841 vatB [Staphylococcus aureus]	42.7	9.2e-06	29.825	114	66	vatB	vatB is a plasmid-mediated acetyltransferase found in Staphylococcus aureus	streptogramin vat acetyltransferase	streptogramin antibiotic	antibiotic inactivation
CJQ_1_04453	381	17	348	87.14	28.88	CAL84423.1	344	10	338	95.64	31.69	CAL84423.1 ARO:3004146 cfrC [Clostridium botulinum A str. ATCC 3502]	179	0	33.14	344	203	cfrC	A cfr-like 23S rRNA methyltransferase shown to confer resistance to linezolid and phenicol antibiotics, including florfenicol and chloramphenicol, in Clostridium.	Cfr 23S ribosomal RNA methyltransferase	lincosamide antibiotic;oxazolidinone antibiotic;phenicol antibiotic;streptogramin antibiotic	antibiotic target alteration
CJQ_1_04469	385	1	249	64.68	19.2	ADZ12699.1	258	1	246	95.35	28.31	ADZ12699.1 ARO:3005091 RanA [Riemerella anatipestifer RA-GD]	120	2.06e-32	29.688	256	163	RanA	RanA is a part of the RanARanB ABC-type efflux system. Alongside RanB, it confers resistance to aminoglycoside antibiotics.	ATP-binding cassette (ABC) antibiotic efflux pump	aminoglycoside antibiotic	antibiotic efflux
CJQ_1_04473	527	10	458	85.2	25.75	CAG39573	693	9	473	67.1	20.28	CAG39573 ARO:3003735 Staphylococcus mutant fusA gene conferring resistance to fusidic acid [Staphylococcus aureus subsp. aureus MRSA252]	182	0	30.228	483	285	Staphylococcus aureus fusA with mutation conferring resistance to fusidic acid	The mutations to this gene are involved in altering the translation elongation factor G (EF-G) in association with the ribosome to prevent fusidic acid from binding EF-G and preventing translation.	antibiotic resistant fusA	fusidic acid	antibiotic target alteration
CJQ_1_04477	266	168	256	33.46	10.53	AAL23089.1	107	17	103	81.31	25.58	AAL23089.1 ARO:3003383 Salmonella serovars soxS with mutation conferring antibiotic resistance [Salmonella enterica subsp. enterica serovar Typhimurium str. LT2]	51.2	1.99e-09	31.461	89	59	Salmonella serovars soxS with mutation conferring antibiotic resistance	SoxS is a global regulator that up-regulates the expression of AcrAB efflux genes. It also reduces OmpF expression to decrease cell membrane permeability.	ATP-binding cassette (ABC) antibiotic efflux pump;General Bacterial Porin with reduced permeability to beta-lactams;major facilitator superfamily (MFS) antibiotic efflux pump;resistance-nodulation-cell division (RND) antibiotic efflux pump	carbapenem;cephalosporin;cephamycin;fluoroquinolone antibiotic;glycylcycline;monobactam;penam;penem;phenicol antibiotic;rifamycin antibiotic;tetracycline antibiotic;triclosan	antibiotic efflux;antibiotic target alteration;reduced permeability to antibiotic
CJQ_1_04479	322	18	239	68.94	18.94	ADZ12699.1	258	5	223	84.88	23.32	ADZ12699.1 ARO:3005091 RanA [Riemerella anatipestifer RA-GD]	113	0	27.477	222	158	RanA	RanA is a part of the RanARanB ABC-type efflux system. Alongside RanB, it confers resistance to aminoglycoside antibiotics.	ATP-binding cassette (ABC) antibiotic efflux pump	aminoglycoside antibiotic	antibiotic efflux
CJQ_1_04480	322	3	229	70.5	22.67	ADZ12699.1	258	1	214	82.95	26.67	ADZ12699.1 ARO:3005091 RanA [Riemerella anatipestifer RA-GD]	110	0	32.159	227	141	RanA	RanA is a part of the RanARanB ABC-type efflux system. Alongside RanB, it confers resistance to aminoglycoside antibiotics.	ATP-binding cassette (ABC) antibiotic efflux pump	aminoglycoside antibiotic	antibiotic efflux
CJQ_1_04484	459	1	459	100	37.03	AAG04347.1	443	1	443	100	37.03	AAG04347.1 ARO:3003686 Pseudomonas aeruginosa oprD with mutation conferring resistance to imipenem [Pseudomonas aeruginosa PAO1]	243	1.17e-76	37.029	478	247	Pseudomonas aeruginosa oprD with mutation conferring resistance to imipenem	oprD is an outer membrane porin which facilitates the uptake of basic amino acids and imipenem in Pseudomonas aeruginosa.	Outer Membrane Porin (Opr)	carbapenem;cephalosporin;cephamycin;monobactam;penam;penem	reduced permeability to antibiotic
CJQ_1_04488	418	72	404	79.67	17.25	ABD30512.1	451	128	445	70.51	15.27	ABD30512.1 ARO:3000839 arlS [Staphylococcus aureus subsp. aureus NCTC 8325]	55.8	2.81e-09	21.652	351	224	arlS	ArlS is a protein histidine kinase that phosphorylates ArlR, a promoter for norA expression.	major facilitator superfamily (MFS) antibiotic efflux pump	acridine dye;disinfecting agents and intercalating dyes;fluoroquinolone antibiotic	antibiotic efflux
CJQ_1_04489	186	15	165	81.18	23.19	CDO13981.1	223	3	152	67.26	19.22	CDO13981.1 ARO:3003585 Klebsiella mutant PhoP conferring antibiotic resistance to colistin [Klebsiella pneumoniae]	50.4	9.68e-09	28.571	154	103	Klebsiella mutant PhoP conferring antibiotic resistance to colistin	A mutant phoP activates pmrHFIJKLM expression responsible for L-aminoarabinose synthesis and polymyxin resistance, by way of alteration of negative charge	ATP-binding cassette (ABC) antibiotic efflux pump;pmr phosphoethanolamine transferase	macrolide antibiotic;peptide antibiotic	antibiotic efflux;antibiotic target alteration
CJQ_1_04516	241	4	224	91.7	31.12	APB03214.1	343	18	235	63.56	21.57	APB03214.1 ARO:3003980 tetA(48) [Paenibacillus sp. LC231]	113	0	33.937	221	143	tetA(58)	TetA(58) is a Tetracycline efflux pump described in Paenibacillus sp. LC231, a strain of Paenibacillus isolated from Lechuguilla Cave, NM, USA. Described by Pawlowski et al. 2016.	major facilitator superfamily (MFS) antibiotic efflux pump	tetracycline antibiotic	antibiotic efflux
CJQ_1_04521	269	1	266	98.88	57.62	VWQ04088.1	269	1	266	98.88	57.62	VWQ04088.1 ARO:3005041 mlaF [Escherichia coli]	308	0	58.271	266	111	mlaF	mlaF from the mla system is a gene proposed to play a part in the transport of phospholipids to the outer membrane. Insertions in mlaF are shown to confer resistance to linezolid.	ATP-binding cassette (ABC) antibiotic efflux pump	oxazolidinone antibiotic	antibiotic efflux
CJQ_1_04522	265	45	260	81.51	24.19	ADZ12700.1	253	33	250	86.17	25.57	ADZ12700.1 ARO:3005090 RanB [Riemerella anatipestifer RA-GD]	100	0	29.68	219	150	RanB	RanB is the determinant of antibiotic resistance within the RanARanB ABC-type efflux system. It confers resistance to aminoglycoside antibiotics.	ATP-binding cassette (ABC) antibiotic efflux pump	aminoglycoside antibiotic	antibiotic efflux
CJQ_1_04523	161	1	149	92.55	43.27	VWQ04090.1	183	1	154	84.15	39.34	VWQ04090.1 ARO:3005042 mlaD [Escherichia coli]	129	0	46.753	154	77	mlaD	mlaD from the mla system is a gene proposed to play a part in the transport of phospholipids to the outer membrane. Insertions in mlaD are shown to confer resistance to linezolid.	ATP-binding cassette (ABC) antibiotic efflux pump	oxazolidinone antibiotic	antibiotic efflux
CJQ_1_04527	421	1	421	100	60.33	AIL15701	419	1	418	99.76	60.19	AIL15701 ARO:3003775 Escherichia coli murA with mutation conferring resistance to fosfomycin [Escherichia coli ATCC 25922]	521	0	60.333	421	164	Escherichia coli murA with mutation conferring resistance to fosfomycin	murA or UDP-N-acetylglucosamine enolpyruvyl transferase catalyses the initial step in peptidoglycan biosynthesis and is inhibited by fosfomycin. Overexpression of murA through mutations such as Asp369Asn and Leu370Ile confers fosfomycin resistance. Extensive evidence has shown the significance of C115 mutations in conferring fosfomycin resistance since this residue represents a primary binding si…	antibiotic-resistant murA transferase	fosfomycin	antibiotic target alteration
CJQ_1_04538	948	18	761	78.48	18.27	CAA52296.1	917	31	770	80.7	18.79	CAA52296.1 ARO:3003729 Staphylococcus aureus ileS with mutation conferring resistance to mupirocin [Staphylococcus aureus]	205	0	23.284	816	478	Staphylococcus aureus ileS with mutation conferring resistance to mupirocin	Point mutations to the isoleucyl-tRNA synthetase (ileS) in Staphylococcus aureus that confer resistance to mupirocin.	antibiotic-resistant isoleucyl-tRNA synthetase (ileS)	mupirocin	antibiotic target alteration
CJQ_1_04547	121	1	120	99.17	52.84	NP_253005.1	124	1	121	97.58	51.99	NP_253005.1 ARO:3004069 MvaT [Pseudomonas aeruginosa PAO1]	127	0	53.279	122	54	MvaT	MvaT, a global regulator of virulence genes in P. aeruginosa, has also shown to be able to repress the expression of the MexEF-OprN pump.	resistance-nodulation-cell division (RND) antibiotic efflux pump	diaminopyrimidine antibiotic;fluoroquinolone antibiotic;phenicol antibiotic	antibiotic efflux
CJQ_1_04554	452	44	404	79.87	18.83	ABO11759.2	429	21	378	83.45	19.67	ABO11759.2 ARO:3004573 Acinetobacter baumannii AbaF [Acinetobacter baumannii ATCC 17978]	52.8	2.49e-08	23.575	386	242	Acinetobacter baumannii AbaF	Expression of abaF in E. coli resulted in increased resistance to fosfomycin.	major facilitator superfamily (MFS) antibiotic efflux pump	fosfomycin	antibiotic efflux
CJQ_1_04555	253	4	247	96.44	35.28	AAC74177.1	244	6	241	96.72	35.39	AAC74177.1 ARO:3004049 antibiotic resistant fabG [Escherichia coli str. K-12 substr. MG1655]	141	0	36.585	246	144	Escherichia coli fabG mutations conferring resistance to triclosan	fabG is a 3-oxoacyl-acyl carrier protein reductase involved in lipid metabolism and fatty acid biosynthesis.The bacterial biocide Triclosan blocks the final reduction step in fatty acid elongation, inhibiting biosynthesis. Point mutations in fabG can confer resistance to Triclosan.	antibiotic resistant fabG	triclosan	antibiotic target alteration
CJQ_1_04556	249	4	248	98.39	34.94	AAC74177.1	244	3	243	98.77	35.07	AAC74177.1 ARO:3004049 antibiotic resistant fabG [Escherichia coli str. K-12 substr. MG1655]	140	0	35.51	245	154	Escherichia coli fabG mutations conferring resistance to triclosan	fabG is a 3-oxoacyl-acyl carrier protein reductase involved in lipid metabolism and fatty acid biosynthesis.The bacterial biocide Triclosan blocks the final reduction step in fatty acid elongation, inhibiting biosynthesis. Point mutations in fabG can confer resistance to Triclosan.	antibiotic resistant fabG	triclosan	antibiotic target alteration
CJQ_1_04572	188	6	151	77.66	29.79	CAA79966.1	295	6	151	49.49	18.98	CAA79966.1 ARO:3003665 NmcR [Enterobacter cloacae]	108	0	38.356	146	90	NmcR	NmcR is a homolog of the LysR regulator found in Enterobacter cloacae that contribute to the regulation of NmcA beta-lactamase	NmcA beta-lactamase	carbapenem;cephalosporin;cephamycin;penam	antibiotic inactivation
CJQ_1_04584	304	6	121	38.16	12.72	ALH22601.1	337	1	117	34.72	11.57	ALH22601.1 ARO:3000620 adeL [Acinetobacter baumannii]	60.8	2.04e-11	33.333	117	77	adeL	AdeL is a regulator of AdeFGH in Acinetobacter baumannii. AdeL mutations are associated with AdeFGH overexpression and multidrug resistance.	resistance-nodulation-cell division (RND) antibiotic efflux pump	fluoroquinolone antibiotic;tetracycline antibiotic	antibiotic efflux
CJQ_1_04585	428	77	425	81.54	21.9	ABO11759.2	429	61	425	85.08	22.85	ABO11759.2 ARO:3004573 Acinetobacter baumannii AbaF [Acinetobacter baumannii ATCC 17978]	108	1.16e-26	26.862	376	237	Acinetobacter baumannii AbaF	Expression of abaF in E. coli resulted in increased resistance to fosfomycin.	major facilitator superfamily (MFS) antibiotic efflux pump	fosfomycin	antibiotic efflux
CJQ_1_04618	610	43	598	91.15	29.24	AAF67494.2	615	40	593	90.08	28.89	AAF67494.2 ARO:3002522 novA [Streptomyces niveus]	265	0	32.075	583	340	novA	A type III ABC transporter, identified on the novobiocin biosynthetic gene cluster, involved in the transport and resistance of novobiocin.	ATP-binding cassette (ABC) antibiotic efflux pump	aminocoumarin antibiotic	antibiotic efflux
CJQ_1_04621	307	12	254	79.15	17.49	ALH22601.1	337	2	251	74.18	16.39	ALH22601.1 ARO:3000620 adeL [Acinetobacter baumannii]	53.5	5.13e-09	22.093	258	178	adeL	AdeL is a regulator of AdeFGH in Acinetobacter baumannii. AdeL mutations are associated with AdeFGH overexpression and multidrug resistance.	resistance-nodulation-cell division (RND) antibiotic efflux pump	fluoroquinolone antibiotic;tetracycline antibiotic	antibiotic efflux
CJQ_1_04645	432	19	432	95.83	35.91	ABO11759.2	429	7	425	97.67	36.6	ABO11759.2 ARO:3004573 Acinetobacter baumannii AbaF [Acinetobacter baumannii ATCC 17978]	289	5.8e-95	37.47	419	257	Acinetobacter baumannii AbaF	Expression of abaF in E. coli resulted in increased resistance to fosfomycin.	major facilitator superfamily (MFS) antibiotic efflux pump	fosfomycin	antibiotic efflux
CJQ_1_04683	294	7	97	30.95	11.22	ALH22601.1	337	1	91	27	9.79	ALH22601.1 ARO:3000620 adeL [Acinetobacter baumannii]	61.2	1.61e-11	36.264	91	58	adeL	AdeL is a regulator of AdeFGH in Acinetobacter baumannii. AdeL mutations are associated with AdeFGH overexpression and multidrug resistance.	resistance-nodulation-cell division (RND) antibiotic efflux pump	fluoroquinolone antibiotic;tetracycline antibiotic	antibiotic efflux
CJQ_1_04688	224	2	220	97.77	42.22	ATC67679.1	219	3	218	98.63	42.59	ATC67679.1 ARO:3000838 arlR [Staphylococcus aureus subsp. aureus str. Newman]	174	0	43.182	220	120	arlR	ArlR is a response regulator that binds to the norA promoter to activate expression. ArlR must first be phosphorylated by ArlS.	major facilitator superfamily (MFS) antibiotic efflux pump	acridine dye;disinfecting agents and intercalating dyes;fluoroquinolone antibiotic	antibiotic efflux
CJQ_1_04689	460	190	458	58.48	18.24	BAB38260.1	457	188	452	57.99	18.08	BAB38260.1 ARO:3000830 cpxA [Escherichia coli O157:H7 str. Sakai]	117	0	31.183	279	168	cpxA	CpxA is a membrane-localized sensor kinase that is activated by envelope stress. It starts a kinase cascade that activates CpxR, which promotes efflux complex expression.	resistance-nodulation-cell division (RND) antibiotic efflux pump	aminocoumarin antibiotic;aminoglycoside antibiotic	antibiotic efflux
CJQ_1_04695	599	7	375	61.6	15.68	CBH51823.1	640	3	420	65.31	16.63	CBH51823.1 ARO:3000556 tet44 [Campylobacter fetus subsp. fetus]	105	1.05e-24	25.455	440	235	tet(44)	Tet44 is a tetracycline resistance gene found in Campylobacter fetus, and binds to the ribosome to confer antibiotic resistance as a ribosomal protection protein.	tetracycline-resistant ribosomal protection protein	tetracycline antibiotic	antibiotic target protection
CJQ_1_04704	459	186	440	55.56	20.57	AEX49906.1	477	181	438	54.09	20.03	AEX49906.1 ARO:3003583 basS [Pseudomonas aeruginosa]	128	0	37.023	262	154	basS	Histidine protein kinase sensor Lipid A modification gene; part of a two-component system involved in polymyxin resistance that senses high extracellular Fe(2+)	pmr phosphoethanolamine transferase	peptide antibiotic	antibiotic efflux;antibiotic target alteration
CJQ_1_04705	223	1	216	96.86	43.05	AAG08162.1	221	1	214	96.83	43.04	AAG08162.1 ARO:3003582 basR [Pseudomonas aeruginosa PAO1]	166	1.78e-52	44.444	216	118	basR	Response regulator for Lipid A modification genes; two-component system involved in polymyxin resistance that senses high extracellular Fe(2+)	pmr phosphoethanolamine transferase	peptide antibiotic	antibiotic efflux;antibiotic target alteration
CJQ_1_04706	429	25	428	94.17	37.14	AAG04347.1	443	21	442	95.26	37.57	AAG04347.1 ARO:3003686 Pseudomonas aeruginosa oprD with mutation conferring resistance to imipenem [Pseudomonas aeruginosa PAO1]	274	0	39.443	431	225	Pseudomonas aeruginosa oprD with mutation conferring resistance to imipenem	oprD is an outer membrane porin which facilitates the uptake of basic amino acids and imipenem in Pseudomonas aeruginosa.	Outer Membrane Porin (Opr)	carbapenem;cephalosporin;cephamycin;monobactam;penam;penem	reduced permeability to antibiotic
CJQ_1_04723	585	368	584	37.09	11.77	AAD51347.1	467	251	467	46.47	14.75	AAD51347.1 ARO:3003067 smeS [Stenotrophomonas maltophilia]	67	1.62e-12	31.739	230	131	smeS	smeS is the protein kinase sensor component of a two component signal transduction system that includes smeR	resistance-nodulation-cell division (RND) antibiotic efflux pump	aminoglycoside antibiotic;cephalosporin;cephamycin;penam	antibiotic efflux
CJQ_1_04724	443	144	435	65.91	24.77	AAK37618.1	318	23	316	92.45	34.75	AAK37618.1 ARO:3005008 Txr [Vibrio harveyi]	196	0	37.584	298	176	TxR	TxR is a putative transcription regulator that plays a role in conferring tetracycline resistance. It is required for proper functioning of Tet35.	ATP-binding cassette (ABC) antibiotic efflux pump	tetracycline antibiotic	antibiotic efflux
CJQ_1_04725	439	25	434	93.39	27.66	ABO11759.2	429	5	424	97.9	29	ABO11759.2 ARO:3004573 Acinetobacter baumannii AbaF [Acinetobacter baumannii ATCC 17978]	175	0	29.621	422	283	Acinetobacter baumannii AbaF	Expression of abaF in E. coli resulted in increased resistance to fosfomycin.	major facilitator superfamily (MFS) antibiotic efflux pump	fosfomycin	antibiotic efflux
CJQ_1_04731	306	205	294	29.41	8.17	AFK13828.1	124	23	112	72.58	20.16	AFK13828.1 ARO:3000823 ramA [Enterobacter cloacae]	45.4	4.7e-07	27.778	90	65	ramA	RamA (resistance antibiotic multiple) is a positive regulator of AcrAB-TolC and leads to high level multidrug resistance in Klebsiella pneumoniae, Salmonella enterica, and Enterobacter aerugenes, increasing the expression of both the mar operon as well as AcrAB. RamA also decreases OmpF expression.	General Bacterial Porin with reduced permeability to beta-lactams;resistance-nodulation-cell division (RND) antibiotic efflux pump	carbapenem;cephalosporin;cephamycin;fluoroquinolone antibiotic;glycylcycline;monobactam;penam;penem;phenicol antibiotic;rifamycin antibiotic;tetracycline antibiotic;triclosan	antibiotic efflux;reduced permeability to antibiotic
CJQ_1_04733	291	1	267	91.75	28.78	CAA79966.1	295	1	263	89.15	27.96	CAA79966.1 ARO:3003665 NmcR [Enterobacter cloacae]	112	0	31.365	271	174	NmcR	NmcR is a homolog of the LysR regulator found in Enterobacter cloacae that contribute to the regulation of NmcA beta-lactamase	NmcA beta-lactamase	carbapenem;cephalosporin;cephamycin;penam	antibiotic inactivation
CJQ_1_04736	304	7	295	95.07	31.8	ALH22601.1	337	1	293	86.94	29.08	ALH22601.1 ARO:3000620 adeL [Acinetobacter baumannii]	159	3.17e-47	33.447	293	191	adeL	AdeL is a regulator of AdeFGH in Acinetobacter baumannii. AdeL mutations are associated with AdeFGH overexpression and multidrug resistance.	resistance-nodulation-cell division (RND) antibiotic efflux pump	fluoroquinolone antibiotic;tetracycline antibiotic	antibiotic efflux
CJQ_1_04739	483	27	481	94.2	32.52	BAA07390.1	512	46	509	90.62	31.29	BAA07390.1 ARO:3002893 tcr3 [Kitasatospora aureofaciens]	219	0	34.526	475	280	tcr3	tcr3 is a tetracycline efflux pump that confers self-resistance to Kitasatospora aureofaciens	major facilitator superfamily (MFS) antibiotic efflux pump	tetracycline antibiotic	antibiotic efflux
CJQ_1_04740	210	1	209	99.52	36.67	AAC73566.1	215	1	209	97.21	35.81	AAC73566.1 ARO:3003807 Escherichia coli acrR with mutation conferring multidrug antibiotic resistance [Escherichia coli str. K-12 substr. MG1655]	151	0	36.842	209	132	Escherichia coli acrR with mutation conferring multidrug antibiotic resistance	AcrR is a repressor of the AcrAB-TolC multidrug efflux complex. AcrR mutations result in high level antibiotic resistance. The mutations associated with this model are specific to E. coli.	resistance-nodulation-cell division (RND) antibiotic efflux pump	cephalosporin;fluoroquinolone antibiotic;glycylcycline;penam;phenicol antibiotic;rifamycin antibiotic;tetracycline antibiotic;triclosan	antibiotic efflux;antibiotic target alteration
CJQ_1_04741	384	1	382	99.48	67.79	AAG03814.1	383	1	382	99.74	67.97	AAG03814.1 ARO:3000377 MexA [Pseudomonas aeruginosa PAO1]	515	0	68.146	383	120	MexA	MexA is the membrane fusion protein of the MexAB-OprM multidrug efflux complex.	resistance-nodulation-cell division (RND) antibiotic efflux pump	aminocoumarin antibiotic;carbapenem;cephalosporin;cephamycin;diaminopyrimidine antibiotic;fluoroquinolone antibiotic;macrolide antibiotic;monobactam;penam;penem;peptide antibiotic;phenicol antibiotic;sulfonamide antibiotic;tetracycline antibiotic	antibiotic efflux
CJQ_1_04742	1050	1	1042	99.24	77.83	AAA74437.1	1046	1	1043	99.71	78.2	AAA74437.1 ARO:3000378 MexB [Pseudomonas aeruginosa]	1698	0	78.428	1043	224	MexB	MexB is the inner membrane multidrug exporter of the efflux complex MexAB-OprM.	resistance-nodulation-cell division (RND) antibiotic efflux pump	aminocoumarin antibiotic;carbapenem;cephalosporin;cephamycin;diaminopyrimidine antibiotic;fluoroquinolone antibiotic;macrolide antibiotic;monobactam;penam;penem;peptide antibiotic;phenicol antibiotic;sulfonamide antibiotic;tetracycline antibiotic	antibiotic efflux
CJQ_1_04743	484	1	466	96.28	67.62	AAG03816.1	485	1	467	96.29	67.63	AAG03816.1 ARO:3000379 OprM [Pseudomonas aeruginosa PAO1]	659	0	70.236	467	138	OprM	OprM is an outer membrane factor protein found in Pseudomonas aeruginosa and Burkholderia vietnamiensis. It is part of the MexAB-OprM, MexVW-OprM, MexXY-OprM and the AmrAB-OprM complex.	resistance-nodulation-cell division (RND) antibiotic efflux pump	acridine dye;aminocoumarin antibiotic;aminoglycoside antibiotic;carbapenem;cephalosporin;cephamycin;diaminopyrimidine antibiotic;disinfecting agents and intercalating dyes;fluoroquinolone antibiotic;macrolide antibiotic;monobactam;penam;penem;peptide antibiotic;phenicol antibiotic;sulfonamide antibiotic;tetracycline antibiotic	antibiotic efflux
CJQ_1_04744	418	15	418	96.65	37.4	AAG04347.1	443	20	443	95.71	37.04	AAG04347.1 ARO:3003686 Pseudomonas aeruginosa oprD with mutation conferring resistance to imipenem [Pseudomonas aeruginosa PAO1]	255	0	38.695	429	233	Pseudomonas aeruginosa oprD with mutation conferring resistance to imipenem	oprD is an outer membrane porin which facilitates the uptake of basic amino acids and imipenem in Pseudomonas aeruginosa.	Outer Membrane Porin (Opr)	carbapenem;cephalosporin;cephamycin;monobactam;penam;penem	reduced permeability to antibiotic
CJQ_1_04749	429	18	391	87.18	26.63	ABO11759.2	429	8	389	89.04	27.2	ABO11759.2 ARO:3004573 Acinetobacter baumannii AbaF [Acinetobacter baumannii ATCC 17978]	163	0	30.548	383	256	Acinetobacter baumannii AbaF	Expression of abaF in E. coli resulted in increased resistance to fosfomycin.	major facilitator superfamily (MFS) antibiotic efflux pump	fosfomycin	antibiotic efflux
CJQ_1_04751	448	43	404	80.8	18.65	ACJ41547.2	434	28	381	81.57	18.82	ACJ41547.2 ARO:3004574 Acinetobacter baumannii AbaQ [Acinetobacter baumannii AB0057]	63.5	1.13e-11	23.077	377	252	Acinetobacter baumannii AbaQ	AbaQ is an MFS transporter mainly involved in the extrusion of quinolone-type drugs in A. baumannii	major facilitator superfamily (MFS) antibiotic efflux pump	fluoroquinolone antibiotic	antibiotic efflux
CJQ_1_04757	370	172	362	51.62	15.58	NP_215000.1	480	241	447	43.12	13.02	NP_215000.1 ARO:3005108 Mycobacterium tuberculosis mshA mutations conferring resistance to prothionamide [Mycobacterium tuberculosis H37Rv]	64.3	4.16e-12	30.189	212	122	Mycobacterium tuberculosis mshA mutations conferring resistance to prothionamide	Mutations in Mycobacterium tuberculosis mshA conferring resistance to prothionamide, an analogue to isoniazid	prothionamide resistant mshA	prothionamide	antibiotic target alteration
CJQ_1_04761	283	115	244	45.94	13.22	AAG06942.1	662	27	159	20.09	5.78	AAG06942.1 ARO:3002985 arnA [Pseudomonas aeruginosa PAO1]	48.1	4.13e-07	28.777	139	84	arnA	arnA modifies lipid A with 4-amino-4-deoxy-L-arabinose (Ara4N) which allows gram-negative bacteria to resist the antimicrobial activity of cationic antimicrobial peptides and antibiotics such as polymyxin. arnA is found in E. coli and P. aeruginosa.	pmr phosphoethanolamine transferase	peptide antibiotic	antibiotic target alteration
CJQ_1_04762	125	1	124	99.2	80.8	NP_253005.1	124	1	123	99.19	80.8	NP_253005.1 ARO:3004069 MvaT [Pseudomonas aeruginosa PAO1]	197	0	81.452	124	22	MvaT	MvaT, a global regulator of virulence genes in P. aeruginosa, has also shown to be able to repress the expression of the MexEF-OprN pump.	resistance-nodulation-cell division (RND) antibiotic efflux pump	diaminopyrimidine antibiotic;fluoroquinolone antibiotic;phenicol antibiotic	antibiotic efflux
CJQ_1_04773	385	12	369	92.99	26.02	ABD31357.1	494	131	486	72.06	20.16	ABD31357.1 ARO:3003074 Staphylococcus aureus cls conferring resistance to daptomycin [Staphylococcus aureus subsp. aureus NCTC 8325]	157	0	27.978	361	252	Staphylococcus aureus cls conferring resistance to daptomycin	cls or cardiolipin synthetase is an inner membrane protein that is involved in membrane synthesis. Specific mutations in S. aureus can confer resistance to daptomycin.	daptomycin resistant cls	peptide antibiotic	antibiotic target alteration
CJQ_1_04786	683	419	674	37.48	12.64	AAM15533.1	399	130	392	65.91	22.22	AAM15533.1 ARO:3003688 PvrR [Pseudomonas aeruginosa]	133	1.4e-34	33.712	264	166	PvrR	PvrR is a response regulator that controls the conversion between antibiotic-resistant and antibiotic-susceptible forms of Pseudomonas aeruginosa biofilms through porin deletion/gene absence	phenotypic variant regulator	aminoglycoside antibiotic	resistance by absence
CJQ_1_04800	235	56	186	55.74	25.6	AAA26683.1	219	68	192	57.08	26.21	AAA26683.1 ARO:3002840 vatA [Staphylococcus aureus]	116	0	45.926	135	59	vatA	vatA is a plasmid-mediated acetyltransferase found in Staphylococcus aureus	streptogramin vat acetyltransferase	streptogramin antibiotic	antibiotic inactivation
CJQ_1_04804	217	3	202	92.17	25.97	AAC74000.1	582	343	556	36.77	10.36	AAC74000.1 ARO:3003950 msbA [Escherichia coli str. K-12 substr. MG1655]	64.7	3.75e-13	28.182	220	132	msbA	MsbA is a multidrug resistance transporter homolog from E. coli and belongs to a superfamily of transporters that contain an adenosine triphosphate (ATP) binding cassette (ABC) which is also called a nucleotide-binding domain (NBD). MsbA is a member of the MDR-ABC transporter group by sequence homology. MsbA transports lipid A, a major component of the bacterial outer cell membrane, and is the on…	ATP-binding cassette (ABC) antibiotic efflux pump	nitroimidazole antibiotic	antibiotic efflux
CJQ_1_04806	244	79	220	58.2	22.63	AAA86871.1	212	65	198	63.21	24.58	AAA86871.1 ARO:3002841 vatB [Staphylococcus aureus]	103	0	38.889	144	76	vatB	vatB is a plasmid-mediated acetyltransferase found in Staphylococcus aureus	streptogramin vat acetyltransferase	streptogramin antibiotic	antibiotic inactivation
CJQ_2_00004	304	1	296	97.37	28.1	CAA79966.1	295	1	292	98.98	28.57	CAA79966.1 ARO:3003665 NmcR [Enterobacter cloacae]	128	0	28.859	298	204	NmcR	NmcR is a homolog of the LysR regulator found in Enterobacter cloacae that contribute to the regulation of NmcA beta-lactamase	NmcA beta-lactamase	carbapenem;cephalosporin;cephamycin;penam	antibiotic inactivation
CJQ_2_00019	377	141	374	62.07	16.29	ADZ12700.1	253	18	253	93.28	24.49	ADZ12700.1 ARO:3005090 RanB [Riemerella anatipestifer RA-GD]	90.5	0	26.25	240	167	RanB	RanB is the determinant of antibiotic resistance within the RanARanB ABC-type efflux system. It confers resistance to aminoglycoside antibiotics.	ATP-binding cassette (ABC) antibiotic efflux pump	aminoglycoside antibiotic	antibiotic efflux
CJQ_2_00020	263	7	246	91.25	32.7	VWQ04088.1	269	8	246	88.85	31.84	VWQ04088.1 ARO:3005041 mlaF [Escherichia coli]	138	0	35.833	240	153	mlaF	mlaF from the mla system is a gene proposed to play a part in the transport of phospholipids to the outer membrane. Insertions in mlaF are shown to confer resistance to linezolid.	ATP-binding cassette (ABC) antibiotic efflux pump	oxazolidinone antibiotic	antibiotic efflux
CJQ_2_00030	448	162	448	64.06	26.56	AAK37618.1	318	38	316	87.74	36.38	AAK37618.1 ARO:3005008 Txr [Vibrio harveyi]	224	5.66e-71	41.463	287	160	TxR	TxR is a putative transcription regulator that plays a role in conferring tetracycline resistance. It is required for proper functioning of Tet35.	ATP-binding cassette (ABC) antibiotic efflux pump	tetracycline antibiotic	antibiotic efflux
CJQ_2_00031	593	178	593	70.15	20.25	CAG39047	608	193	598	66.78	19.28	CAG39047 ARO:3003794 Staphylococcus aureus walK with mutation conferring daptomycin resistance [Staphylococcus aureus subsp. aureus MRSA252]	180	0	28.873	426	273	Staphylococcus aureus walK with mutation conferring resistance to daptomycin	walK is the histidine kinase sensor of a two-component regulatory system controlling peptidoglycan metabolism through regulation of the expression of most of the peptidoglycan hydrolase genes. Mutations in the gene have been found that confer daptomycin resistance.	daptomycin resistant walK	peptide antibiotic	antibiotic target alteration
CJQ_2_00032	535	285	523	44.67	13.05	AAM15533.1	399	151	390	60.15	17.57	AAM15533.1 ARO:3003688 PvrR [Pseudomonas aeruginosa]	97.4	1.17e-22	29.218	243	165	PvrR	PvrR is a response regulator that controls the conversion between antibiotic-resistant and antibiotic-susceptible forms of Pseudomonas aeruginosa biofilms through porin deletion/gene absence	phenotypic variant regulator	aminoglycoside antibiotic	resistance by absence
CJQ_2_00044	257	2	228	88.33	23.63	AGN74946	541	311	531	40.85	10.93	AGN74946 ARO:3003749 salA [Staphylococcus sciuri subsp. sciuri]	94.7	0	26.754	228	159	salA	salA is an ABC-F subfamily protein gene isolated from the chromosome of Staphylococcus sciuri conferring resistance to lincosamides and streptogramins.	ABC-F ATP-binding cassette ribosomal protection protein	lincosamide antibiotic;macrolide antibiotic;oxazolidinone antibiotic;phenicol antibiotic;pleuromutilin antibiotic;streptogramin antibiotic;tetracycline antibiotic	antibiotic target protection
CJQ_2_00044	257	5	196	74.71	15.59	AGN74946	541	2	201	36.97	7.72	AGN74946 ARO:3003749 salA [Staphylococcus sciuri subsp. sciuri]	52.8	8.96e-09	20.874	206	143	salA	salA is an ABC-F subfamily protein gene isolated from the chromosome of Staphylococcus sciuri conferring resistance to lincosamides and streptogramins.	ABC-F ATP-binding cassette ribosomal protection protein	lincosamide antibiotic;macrolide antibiotic;oxazolidinone antibiotic;phenicol antibiotic;pleuromutilin antibiotic;streptogramin antibiotic;tetracycline antibiotic	antibiotic target protection
CJQ_2_00048	335	1	218	65.07	21.79	ADZ12699.1	258	1	214	82.95	27.78	ADZ12699.1 ARO:3005091 RanA [Riemerella anatipestifer RA-GD]	151	0	33.486	218	141	RanA	RanA is a part of the RanARanB ABC-type efflux system. Alongside RanB, it confers resistance to aminoglycoside antibiotics.	ATP-binding cassette (ABC) antibiotic efflux pump	aminoglycoside antibiotic	antibiotic efflux
CJQ_2_00079	298	7	285	93.62	23.66	CAA79966.1	295	6	277	92.2	23.3	CAA79966.1 ARO:3003665 NmcR [Enterobacter cloacae]	101	4.68e-26	25.267	281	199	NmcR	NmcR is a homolog of the LysR regulator found in Enterobacter cloacae that contribute to the regulation of NmcA beta-lactamase	NmcA beta-lactamase	carbapenem;cephalosporin;cephamycin;penam	antibiotic inactivation
CJQ_2_00083	299	6	299	98.33	30.36	CAA79966.1	295	3	291	97.97	30.24	CAA79966.1 ARO:3003665 NmcR [Enterobacter cloacae]	124	1.88e-34	30.872	298	193	NmcR	NmcR is a homolog of the LysR regulator found in Enterobacter cloacae that contribute to the regulation of NmcA beta-lactamase	NmcA beta-lactamase	carbapenem;cephalosporin;cephamycin;penam	antibiotic inactivation
CJQ_2_00089	325	1	274	84.31	30	ADT64081.1	339	1	278	82.01	29.18	ADT64081.1 ARO:3000813 MexS [Pseudomonas aeruginosa PAK]	119	0	35.587	281	171	MexS	MexS is a suppressor of MexT, which is an activator of the multidrug pump MexEF-OprN. Mutations in MexS lead to multidrug resistance.	resistance-nodulation-cell division (RND) antibiotic efflux pump	diaminopyrimidine antibiotic;fluoroquinolone antibiotic;phenicol antibiotic	antibiotic efflux
CJQ_2_00095	310	3	278	89.03	29.36	AAG06942.1	662	6	278	41.24	13.6	AAG06942.1 ARO:3002985 arnA [Pseudomonas aeruginosa PAO1]	131	0	32.975	279	178	arnA	arnA modifies lipid A with 4-amino-4-deoxy-L-arabinose (Ara4N) which allows gram-negative bacteria to resist the antimicrobial activity of cationic antimicrobial peptides and antibiotics such as polymyxin. arnA is found in E. coli and P. aeruginosa.	pmr phosphoethanolamine transferase	peptide antibiotic	antibiotic target alteration
CJQ_2_00105	539	21	324	56.4	20.03	ABO11759.2	429	6	312	71.56	25.41	ABO11759.2 ARO:3004573 Acinetobacter baumannii AbaF [Acinetobacter baumannii ATCC 17978]	177	0	35.505	307	195	Acinetobacter baumannii AbaF	Expression of abaF in E. coli resulted in increased resistance to fosfomycin.	major facilitator superfamily (MFS) antibiotic efflux pump	fosfomycin	antibiotic efflux
CJQ_2_00105	539	438	532	17.63	6.43	ABO11759.2	429	328	421	21.91	7.99	ABO11759.2 ARO:3004573 Acinetobacter baumannii AbaF [Acinetobacter baumannii ATCC 17978]	53.1	2.45e-08	36.458	96	58	Acinetobacter baumannii AbaF	Expression of abaF in E. coli resulted in increased resistance to fosfomycin.	major facilitator superfamily (MFS) antibiotic efflux pump	fosfomycin	antibiotic efflux
CJQ_2_00107	295	7	198	65.08	15.02	ALH22601.1	337	1	208	61.72	14.24	ALH22601.1 ARO:3000620 adeL [Acinetobacter baumannii]	55.1	1.81e-09	23.077	208	144	adeL	AdeL is a regulator of AdeFGH in Acinetobacter baumannii. AdeL mutations are associated with AdeFGH overexpression and multidrug resistance.	resistance-nodulation-cell division (RND) antibiotic efflux pump	fluoroquinolone antibiotic;tetracycline antibiotic	antibiotic efflux
CJQ_2_00110	294	52	177	42.86	12.38	WP_122630829.1	302	93	225	44.04	12.72	WP_122630829.1 ARO:3006872 DHT2-1 [uncultured bacterium]	53.1	5.75e-09	28.889	135	85	DHT2-1	DHT2-1 is a DHT2 beta-lactamase.	DHT2 beta-lactamase	carbapenem	antibiotic inactivation
CJQ_2_00111	430	135	429	68.6	26.74	AAK37618.1	318	23	316	92.45	36.04	AAK37618.1 ARO:3005008 Txr [Vibrio harveyi]	213	0	38.983	295	179	TxR	TxR is a putative transcription regulator that plays a role in conferring tetracycline resistance. It is required for proper functioning of Tet35.	ATP-binding cassette (ABC) antibiotic efflux pump	tetracycline antibiotic	antibiotic efflux
CJQ_2_00120	260	3	203	77.31	21.92	AAC74177.1	244	6	202	80.74	22.9	AAC74177.1 ARO:3004049 antibiotic resistant fabG [Escherichia coli str. K-12 substr. MG1655]	81.3	0	28.358	201	140	Escherichia coli fabG mutations conferring resistance to triclosan	fabG is a 3-oxoacyl-acyl carrier protein reductase involved in lipid metabolism and fatty acid biosynthesis.The bacterial biocide Triclosan blocks the final reduction step in fatty acid elongation, inhibiting biosynthesis. Point mutations in fabG can confer resistance to Triclosan.	antibiotic resistant fabG	triclosan	antibiotic target alteration
CJQ_2_00125	214	7	214	97.2	60.28	BAE77933.1	210	6	210	97.62	60.54	BAE77933.1 ARO:3000518 CRP [Escherichia coli str. K-12 substr. W3110]	271	0	62.019	208	76	CRP	CRP is a global regulator that represses MdtEF multidrug efflux pump expression.	resistance-nodulation-cell division (RND) antibiotic efflux pump	fluoroquinolone antibiotic;macrolide antibiotic;penam	antibiotic efflux
CJQ_2_00137	374	14	222	55.88	18.45	ADZ12699.1	258	1	214	82.95	27.39	ADZ12699.1 ARO:3005091 RanA [Riemerella anatipestifer RA-GD]	125	0	33.023	215	137	RanA	RanA is a part of the RanARanB ABC-type efflux system. Alongside RanB, it confers resistance to aminoglycoside antibiotics.	ATP-binding cassette (ABC) antibiotic efflux pump	aminoglycoside antibiotic	antibiotic efflux
CJQ_2_00138	209	1	201	96.17	40.19	CDJ73205	196	1	190	96.94	40.51	CDJ73205 ARO:3003893 Escherichia coli UhpA with mutation conferring resistance to fosfomycin [Escherichia coli str. K-12 substr. MC4100]	137	0	41.791	201	106	Escherichia coli UhpA with mutation conferring resistance to fosfomycin	uhpA is a positive activator of the fosfomycin importer uhpT, thus mutations to uhpA confer fosfomycin resistance by reducing uhpT expression. Both knockout and amino acid substitution mutations have been found that confer resistance, with the Protein Knockout model describing the large, knockout mutations causing loss of function of the gene, and the Protein Variant model describing the amino ac…	antibiotic-resistant UhpT	fosfomycin	antibiotic target alteration
CJQ_2_00139	795	593	794	25.41	8.06	AFK58561.1	355	149	351	57.18	18.14	AFK58561.1 ARO:3003079 Enterococcus faecium liaS mutant conferring daptomycin resistance [Enterococcus faecium DO]	94.7	0	31.731	208	131	Enterococcus faecium liaS mutant conferring daptomycin resistance	liaS is a histidine kinase found in the liaFSR signal transduction pathway. Mutations confer daptomycin resistance.	daptomycin resistant liaS	peptide antibiotic	antibiotic efflux;antibiotic target alteration
CJQ_2_00144	935	148	928	83.53	24.28	AIA35096.1	782	51	779	93.22	27.1	AIA35096.1 ARO:3005059 LptD [Klebsiella pneumoniae subsp. pneumoniae KPNIH10]	309	0	29.068	805	471	LptD	LptD is involved in LPS transport in a ABC Transporter efflux system. It confers resistance to carbapenems, rifamycin, aminocoumarin and peptide antibiotics.	ATP-binding cassette (ABC) antibiotic efflux pump	aminocoumarin antibiotic;carbapenem;peptide antibiotic;rifamycin antibiotic	antibiotic efflux
CJQ_2_00147	267	12	194	68.54	20.53	CEJ95855.1	245	6	178	70.61	21.15	CEJ95855.1 ARO:3004595 erm45 [Staphylococcus fleurettii]	91.3	7.67e-23	29.947	187	113	erm(45)	Erm45 is an rRNA methylase that confers resistances to macrolide, lincosamide, and streptogramin B.	Erm 23S ribosomal RNA methyltransferase	lincosamide antibiotic;macrolide antibiotic;streptogramin antibiotic	antibiotic target alteration
CJQ_2_00162	1247	989	1225	19.01	6.63	AAM15533.1	399	151	386	59.15	20.63	AAM15533.1 ARO:3003688 PvrR [Pseudomonas aeruginosa]	127	0	34.874	238	152	PvrR	PvrR is a response regulator that controls the conversion between antibiotic-resistant and antibiotic-susceptible forms of Pseudomonas aeruginosa biofilms through porin deletion/gene absence	phenotypic variant regulator	aminoglycoside antibiotic	resistance by absence
CJQ_2_00181	309	7	302	95.79	32.47	ALH22601.1	337	1	290	86.05	29.17	ALH22601.1 ARO:3000620 adeL [Acinetobacter baumannii]	145	0	33.893	298	187	adeL	AdeL is a regulator of AdeFGH in Acinetobacter baumannii. AdeL mutations are associated with AdeFGH overexpression and multidrug resistance.	resistance-nodulation-cell division (RND) antibiotic efflux pump	fluoroquinolone antibiotic;tetracycline antibiotic	antibiotic efflux
CJQ_2_00206	404	25	404	94.06	52.66	AAC60781.1	410	30	410	92.93	52.03	AAC60781.1 ARO:3003048 rosA [Yersinia enterocolitica (type O:8)]	382	0	55.99	384	162	rosA	rosA is part of an efflux pump/potassium antiporter system (RosAB) in Yersinia that confers resistance to cationic antimicrobial peptides such as polymyxin B.	major facilitator superfamily (MFS) antibiotic efflux pump	peptide antibiotic	antibiotic efflux
CJQ_2_00212	111	24	111	79.28	70.27	TKW44661.1	112	25	112	78.57	69.64	TKW44661.1 ARO:3005040 YajC [Pseudomonas aeruginosa]	162	0	88.636	88	10	YajC	YajC interacts with the AcrAB-TolC efflux pump in a way that in uncharacterized but is shown to grant increased fitness in the presence of linezolid, rifampicin, and vancomycin.	resistance-nodulation-cell division (RND) antibiotic efflux pump	cephalosporin;fluoroquinolone antibiotic;glycylcycline;penam;phenicol antibiotic;rifamycin antibiotic;tetracycline antibiotic;triclosan	antibiotic efflux
CJQ_2_00220	269	14	240	84.39	27.78	AAV85982.1	644	14	237	34.78	11.45	AAV85982.1 ARO:3000535 macB [Neisseria gonorrhoeae]	89.7	0	32.922	243	128	macB	MacB is an ATP-binding cassette (ABC) transporter that exports macrolides with 14- or 15- membered lactones. It forms an antibiotic efflux complex with MacA and TolC. macB corresponds to 1 locus in Pseudomonas aeruginosa PAO1 and 1 locus in Pseudomonas aeruginosa LESB58.	ATP-binding cassette (ABC) antibiotic efflux pump	macrolide antibiotic	antibiotic efflux
CJQ_2_00237	518	193	517	62.74	23.94	AAK37618.1	318	23	316	92.45	35.27	AAK37618.1 ARO:3005008 Txr [Vibrio harveyi]	213	0	38.154	325	170	TxR	TxR is a putative transcription regulator that plays a role in conferring tetracycline resistance. It is required for proper functioning of Tet35.	ATP-binding cassette (ABC) antibiotic efflux pump	tetracycline antibiotic	antibiotic efflux
CJQ_2_00239	478	61	447	80.96	19.02	AAG08359.1	482	23	426	83.82	19.69	AAG08359.1 ARO:3003682 OpmH [Pseudomonas aeruginosa PAO1]	59.3	2.62e-10	23.488	430	260	OpmH	OpmH is an outer membrane efflux protein required for triclosan-specific efflux pump function.	resistance-nodulation-cell division (RND) antibiotic efflux pump	triclosan	antibiotic efflux
CJQ_2_00240	722	351	705	49.17	14.57	WP_104671188.1	575	192	546	61.74	18.3	WP_104671188.1 ARO:3003948 efrA [Enterococcus faecalis]	164	0	29.64	361	242	efrA	efrA is a part of the EfrAB efflux pump, and both efrA and efrB are necessary to confer drug resistance.	ATP-binding cassette (ABC) antibiotic efflux pump	fluoroquinolone antibiotic;macrolide antibiotic;rifamycin antibiotic	antibiotic efflux
CJQ_2_00245	386	9	383	97.15	47.67	BAE06005.1	385	12	384	96.88	47.54	BAE06005.1 ARO:3003704 mexM [Pseudomonas aeruginosa]	315	0	49.072	377	186	mexM	mexM is the membrane fusion protein of the MexMN-OprM multidrug efflux complex.	resistance-nodulation-cell division (RND) antibiotic efflux pump	phenicol antibiotic	antibiotic efflux
CJQ_2_00246	1030	1	1019	98.93	71.7	BAE06006.1	1036	1	1021	98.55	71.43	BAE06006.1 ARO:3003705 mexN [Pseudomonas aeruginosa]	1479	0	72.478	1021	279	mexN	MexN is the inner membrane transporter of the MexMN-OprM multidrug efflux complex.	resistance-nodulation-cell division (RND) antibiotic efflux pump	phenicol antibiotic	antibiotic efflux
CJQ_2_00247	224	2	219	97.32	38.66	ATC67679.1	219	3	218	98.63	39.18	ATC67679.1 ARO:3000838 arlR [Staphylococcus aureus subsp. aureus str. Newman]	166	0	39.726	219	128	arlR	ArlR is a response regulator that binds to the norA promoter to activate expression. ArlR must first be phosphorylated by ArlS.	major facilitator superfamily (MFS) antibiotic efflux pump	acridine dye;disinfecting agents and intercalating dyes;fluoroquinolone antibiotic	antibiotic efflux
CJQ_2_00248	477	154	453	62.89	14.99	ABD30512.1	451	145	445	66.74	15.91	ABD30512.1 ARO:3000839 arlS [Staphylococcus aureus subsp. aureus NCTC 8325]	124	0	23.841	302	227	arlS	ArlS is a protein histidine kinase that phosphorylates ArlR, a promoter for norA expression.	major facilitator superfamily (MFS) antibiotic efflux pump	acridine dye;disinfecting agents and intercalating dyes;fluoroquinolone antibiotic	antibiotic efflux
CJQ_2_00250	444	12	444	97.52	38.44	AAG04347.1	443	9	443	98.19	38.71	AAG04347.1 ARO:3003686 Pseudomonas aeruginosa oprD with mutation conferring resistance to imipenem [Pseudomonas aeruginosa PAO1]	276	0	39.421	449	242	Pseudomonas aeruginosa oprD with mutation conferring resistance to imipenem	oprD is an outer membrane porin which facilitates the uptake of basic amino acids and imipenem in Pseudomonas aeruginosa.	Outer Membrane Porin (Opr)	carbapenem;cephalosporin;cephamycin;monobactam;penam;penem	reduced permeability to antibiotic
CJQ_2_00256	950	400	950	58	22.63	CDJ72759	575	2	568	98.61	38.47	CDJ72759 ARO:3003899 Escherichia coli PtsI with mutation conferring resistance to fosfomycin [Escherichia coli str. K-12 substr. MC4100]	372	1.04e-118	39.016	569	327	Escherichia coli PtsI with mutation conferring resistance to fosfomycin	PtsI (phosphoenolpyruvate-protein phosphotransferase) is involved in cyclic AMP synthesis, which regulates glpT expression. As a result, mutations to ptsI confer resistance to fosfomycin by affecting the regulation of fosfomycin import.	antibiotic-resistant ptsI phosphotransferase	fosfomycin	antibiotic target alteration
CJQ_2_00266	396	152	325	43.94	12.39	NP_215000.1	480	212	389	37.08	10.45	NP_215000.1 ARO:3005108 Mycobacterium tuberculosis mshA mutations conferring resistance to prothionamide [Mycobacterium tuberculosis H37Rv]	46.6	1.96e-06	28.191	188	111	Mycobacterium tuberculosis mshA mutations conferring resistance to prothionamide	Mutations in Mycobacterium tuberculosis mshA conferring resistance to prothionamide, an analogue to isoniazid	prothionamide resistant mshA	prothionamide	antibiotic target alteration
CJQ_2_00270	240	113	222	45.83	13.64	CDO13836.1	374	243	363	32.35	9.63	CDO13836.1 ARO:3005044 OmpA [Klebsiella pneumoniae]	67.4	6.64e-14	29.752	121	74	OmpA	OmpA is a porin that confers resistance to beta-lactam antibiotics.	General Bacterial Porin with reduced permeability to beta-lactams	carbapenem;cephalosporin;cephamycin;monobactam;penam;penem	reduced permeability to antibiotic
CJQ_2_00271	214	8	213	96.26	26.76	WP_081853183.1	313	61	278	69.65	19.36	WP_081853183.1 ARO:3006885 ELM-1 [Bacteria]	60.8	6.32e-12	27.803	223	139	ELM-1	ELM-1 is a ELM beta-lactamase.	ELM beta-lactamase	carbapenem	antibiotic inactivation
CJQ_2_00272	230	125	219	41.3	13.35	AAG05187.1	428	322	418	22.66	7.33	AAG05187.1 ARO:3005067 ParS [Pseudomonas aeruginosa PAO1]	50.1	4.6e-08	32.323	99	61	ParS	ParS is the sensor component of the two-component ParRS system. Alongside its counterpart ParR, it confers resistance to polycationic antibiotics though regulation of efflux pumps and porins.	Outer Membrane Porin (Opr);resistance-nodulation-cell division (RND) antibiotic efflux pump	acridine dye;aminoglycoside antibiotic;carbapenem;cephalosporin;cephamycin;disinfecting agents and intercalating dyes;fluoroquinolone antibiotic;macrolide antibiotic;monobactam;penam;penem;phenicol antibiotic;tetracycline antibiotic	antibiotic efflux;reduced permeability to antibiotic
CJQ_2_00274	905	842	903	6.85	3.87	AAO82599.1	210	147	208	29.52	16.67	AAO82599.1 ARO:3003792 Enterococcus faecalis liaR mutant conferring daptomycin resistance [Enterococcus faecalis V583]	65.1	1.44e-12	56.452	62	27	Enterococcus faecalis liaR mutant conferring daptomycin resistance	liaR is a response regulator found in the liaFSR signal transduction pathway. Mutations confer daptomycin resistance.	daptomycin resistant liaR	peptide antibiotic	antibiotic efflux;antibiotic target alteration
CJQ_2_00284	119	1	116	97.48	46.3	NP_253005.1	124	1	119	95.97	45.58	NP_253005.1 ARO:3004069 MvaT [Pseudomonas aeruginosa PAO1]	112	0	47.5	120	58	MvaT	MvaT, a global regulator of virulence genes in P. aeruginosa, has also shown to be able to repress the expression of the MexEF-OprN pump.	resistance-nodulation-cell division (RND) antibiotic efflux pump	diaminopyrimidine antibiotic;fluoroquinolone antibiotic;phenicol antibiotic	antibiotic efflux
CJQ_2_00291	321	54	291	74.14	27.47	AAF36802.1	322	53	295	75.47	27.96	AAF36802.1 ARO:3002945 vanHF [Paenibacillus popilliae ATCC 14706]	129	0	37.052	251	137	vanHF	vanHF is a vanH variant in the vanF gene cluster	glycopeptide resistance gene cluster;vanH	glycopeptide antibiotic	antibiotic target alteration
CJQ_2_00351	369	6	237	62.87	17.63	ADZ12699.1	258	1	237	91.86	25.75	ADZ12699.1 ARO:3005091 RanA [Riemerella anatipestifer RA-GD]	114	0	28.033	239	163	RanA	RanA is a part of the RanARanB ABC-type efflux system. Alongside RanB, it confers resistance to aminoglycoside antibiotics.	ATP-binding cassette (ABC) antibiotic efflux pump	aminoglycoside antibiotic	antibiotic efflux
CJQ_2_00361	244	1	221	90.57	32.72	AAV85982.1	644	3	227	34.94	12.62	AAV85982.1 ARO:3000535 macB [Neisseria gonorrhoeae]	137	0	36.123	227	137	macB	MacB is an ATP-binding cassette (ABC) transporter that exports macrolides with 14- or 15- membered lactones. It forms an antibiotic efflux complex with MacA and TolC. macB corresponds to 1 locus in Pseudomonas aeruginosa PAO1 and 1 locus in Pseudomonas aeruginosa LESB58.	ATP-binding cassette (ABC) antibiotic efflux pump	macrolide antibiotic	antibiotic efflux
CJQ_2_00362	634	413	605	30.44	7.65	ADM92606.1	361	144	338	54.02	13.57	ADM92606.1 ARO:3000549 adeS [Acinetobacter baumannii]	62.4	3.56e-11	25.123	203	134	adeS	AdeS is a sensor kinase in the AdeRS regulatory system of AdeABC. It is essential for AdeABC expression.	resistance-nodulation-cell division (RND) antibiotic efflux pump	glycylcycline;tetracycline antibiotic	antibiotic efflux
CJQ_2_00363	442	147	441	66.74	28.48	AAK37618.1	318	23	316	92.45	39.45	AAK37618.1 ARO:3005008 Txr [Vibrio harveyi]	238	0	42.667	300	161	TxR	TxR is a putative transcription regulator that plays a role in conferring tetracycline resistance. It is required for proper functioning of Tet35.	ATP-binding cassette (ABC) antibiotic efflux pump	tetracycline antibiotic	antibiotic efflux
CJQ_2_00364	305	18	125	35.41	9.51	CAA79966.1	295	21	126	35.93	9.65	CAA79966.1 ARO:3003665 NmcR [Enterobacter cloacae]	46.6	9.05e-07	26.852	108	77	NmcR	NmcR is a homolog of the LysR regulator found in Enterobacter cloacae that contribute to the regulation of NmcA beta-lactamase	NmcA beta-lactamase	carbapenem;cephalosporin;cephamycin;penam	antibiotic inactivation
CJQ_2_00382	463	188	458	58.53	17.88	BAB38260.1	457	188	453	58.21	17.78	BAB38260.1 ARO:3000830 cpxA [Escherichia coli O157:H7 str. Sakai]	112	0	30.545	275	178	cpxA	CpxA is a membrane-localized sensor kinase that is activated by envelope stress. It starts a kinase cascade that activates CpxR, which promotes efflux complex expression.	resistance-nodulation-cell division (RND) antibiotic efflux pump	aminocoumarin antibiotic;aminoglycoside antibiotic	antibiotic efflux
CJQ_2_00383	226	4	222	96.9	37.61	AAG06465.1	223	5	220	96.86	37.59	AAG06465.1 ARO:3005063 cprR [Pseudomonas aeruginosa PAO1]	146	0	38.813	219	131	cprR	cprR is one part of a two-component regulatory system. It with its counterpart cprS induce the Arn operon to confer resistance to peptide antibiotics.	pmr phosphoethanolamine transferase	peptide antibiotic	antibiotic efflux;antibiotic target alteration
CJQ_2_00386	500	24	447	84.8	28.46	ABO11759.2	429	5	425	98.14	32.94	ABO11759.2 ARO:3004573 Acinetobacter baumannii AbaF [Acinetobacter baumannii ATCC 17978]	249	1.13e-78	33.565	432	268	Acinetobacter baumannii AbaF	Expression of abaF in E. coli resulted in increased resistance to fosfomycin.	major facilitator superfamily (MFS) antibiotic efflux pump	fosfomycin	antibiotic efflux
CJQ_2_00390	305	3	108	34.75	11.69	CAA79966.1	295	5	110	35.93	12.09	CAA79966.1 ARO:3003665 NmcR [Enterobacter cloacae]	55.5	1.23e-09	33.645	107	69	NmcR	NmcR is a homolog of the LysR regulator found in Enterobacter cloacae that contribute to the regulation of NmcA beta-lactamase	NmcA beta-lactamase	carbapenem;cephalosporin;cephamycin;penam	antibiotic inactivation
CJQ_2_00394	408	1	370	90.69	25.6	AAB36568.1	436	1	374	85.78	24.22	AAB36568.1 ARO:3002700 cmlv [Streptomyces venezuelae ATCC 10712]	102	0	28.232	379	258	cmlv	cmlv is a chromosome-encoded chloramphenicol phoshotransferase that is found in Streptomyces venezuelae	chloramphenicol phosphotransferase	phenicol antibiotic	antibiotic inactivation
CJQ_2_00400	273	36	221	68.13	19.21	AAK76136.1	588	365	545	30.78	8.68	AAK76136.1 ARO:3000025 patB [Streptococcus pneumoniae TIGR4]	81.6	2.38e-18	28.191	188	126	patB	PatB is an ABC transporter of Streptococcus pneumoniae that interacts with PatA to confer fluoroquinolone resistance..	ATP-binding cassette (ABC) antibiotic efflux pump	fluoroquinolone antibiotic	antibiotic efflux
CJQ_2_00405	631	242	626	61.01	15.33	AAC75429.1	1197	686	1073	32.41	8.14	AAC75429.1 ARO:3000833 evgS [Escherichia coli str. K-12 substr. MG1655]	92.8	2.9e-20	25.123	406	265	evgS	EvgS is a sensor protein that phosphorylates the regulatory protein EvgA. evgS corresponds to 1 locus in Pseudomonas aeruginosa PAO1 and 1 locus in Pseudomonas aeruginosa LESB58.	major facilitator superfamily (MFS) antibiotic efflux pump;resistance-nodulation-cell division (RND) antibiotic efflux pump	fluoroquinolone antibiotic;macrolide antibiotic;penam;tetracycline antibiotic	antibiotic efflux
CJQ_2_00406	221	1	210	95.02	28.68	AFK58562.1	210	1	203	96.67	29.17	AFK58562.1 ARO:3003078 Enterococcus faecium liaR mutant conferring daptomycin resistance [Enterococcus faecium DO]	88.2	0	30.18	222	124	Enterococcus faecium liaR mutant conferring daptomycin resistance	liaR is a response regulator found in the liaFSR signal transduction pathway. Mutations confer daptomycin resistance.	daptomycin resistant liaR	peptide antibiotic	antibiotic efflux;antibiotic target alteration
CJQ_2_00408	263	21	222	76.81	19.76	APB03215.1	271	38	233	72.32	18.61	APB03215.1 ARO:3003981 tetB(48) [Paenibacillus sp. LC231]	57	2.01e-10	25.728	206	139	tetB(58)	Tetracycline resistant TetB(58) efflux pump found in Paenibacillus sp. LC231, a strain of Paenibacillus isolated from Lechuguilla Cave, NM, USA. Described by Pawlowski et al. 2016.	major facilitator superfamily (MFS) antibiotic efflux pump	tetracycline antibiotic	antibiotic efflux
CJQ_2_00409	246	3	244	98.37	31.37	APB03214.1	343	17	268	73.47	23.43	APB03214.1 ARO:3003980 tetA(48) [Paenibacillus sp. LC231]	118	0	31.89	254	159	tetA(58)	TetA(58) is a Tetracycline efflux pump described in Paenibacillus sp. LC231, a strain of Paenibacillus isolated from Lechuguilla Cave, NM, USA. Described by Pawlowski et al. 2016.	major facilitator superfamily (MFS) antibiotic efflux pump	tetracycline antibiotic	antibiotic efflux
CJQ_2_00412	424	225	421	46.46	13.8	AFK58561.1	355	151	350	56.34	16.73	AFK58561.1 ARO:3003079 Enterococcus faecium liaS mutant conferring daptomycin resistance [Enterococcus faecium DO]	89	2.31e-20	29.703	202	135	Enterococcus faecium liaS mutant conferring daptomycin resistance	liaS is a histidine kinase found in the liaFSR signal transduction pathway. Mutations confer daptomycin resistance.	daptomycin resistant liaS	peptide antibiotic	antibiotic efflux;antibiotic target alteration
CJQ_2_00413	212	1	198	93.4	36.89	CDJ73205	196	2	188	95.41	37.69	CDJ73205 ARO:3003893 Escherichia coli UhpA with mutation conferring resistance to fosfomycin [Escherichia coli str. K-12 substr. MC4100]	113	0	39.5	200	106	Escherichia coli UhpA with mutation conferring resistance to fosfomycin	uhpA is a positive activator of the fosfomycin importer uhpT, thus mutations to uhpA confer fosfomycin resistance by reducing uhpT expression. Both knockout and amino acid substitution mutations have been found that confer resistance, with the Protein Knockout model describing the large, knockout mutations causing loss of function of the gene, and the Protein Variant model describing the amino ac…	antibiotic-resistant UhpT	fosfomycin	antibiotic target alteration
CJQ_2_00414	219	48	189	64.84	16.95	AZP56652.1	218	9	161	70.18	18.35	AZP56652.1 ARO:3004627 QnrS15 [Escherichia coli]	55.5	2.34e-10	26.144	153	102	QnrS15	QnrS15 is a plasmid-mediated quinolone resistance protein.	quinolone resistance protein (qnr)	fluoroquinolone antibiotic	antibiotic target protection
CJQ_2_00419	312	47	236	60.9	14.05	AAF94716.1	390	104	306	52.05	12.01	AAF94716.1 ARO:3004289 Vibrio cholerae varG [Vibrio cholerae O1 biovar El Tor str. N16961]	48.9	2.02e-07	23.077	208	137	Vibrio cholerae varG	varG is an Ambler class B metallo-beta-lactamase found on the antibiotic resistance var regulon in Vibrio cholerae, along with an antibiotic efflux pump varABCDEF. These genes are organized as a regulon under the control of VarR transcriptional activator. VarG was shown to have beta-lactamase activity against penicillins, carbapenems and cephalosporins in-vitro. Described by Lin HV et al. 2017.	subclass B1 Vibrio cholerae varG beta-lactamase	carbapenem	antibiotic inactivation
CJQ_2_00429	554	177	552	67.87	17.48	AAC75429.1	1197	689	1073	32.16	8.28	AAC75429.1 ARO:3000833 evgS [Escherichia coli str. K-12 substr. MG1655]	95.9	2.24e-21	25.758	396	263	evgS	EvgS is a sensor protein that phosphorylates the regulatory protein EvgA. evgS corresponds to 1 locus in Pseudomonas aeruginosa PAO1 and 1 locus in Pseudomonas aeruginosa LESB58.	major facilitator superfamily (MFS) antibiotic efflux pump;resistance-nodulation-cell division (RND) antibiotic efflux pump	fluoroquinolone antibiotic;macrolide antibiotic;penam;tetracycline antibiotic	antibiotic efflux
CJQ_2_00437	471	14	464	95.75	76.01	AAG05883.1	472	21	470	95.34	75.68	AAG05883.1 ARO:3000805 OprN [Pseudomonas aeruginosa PAO1]	655	0	79.379	451	92	OprN	OprN is the outer membrane channel component of the MexEF-OprN multidrug efflux complex.	resistance-nodulation-cell division (RND) antibiotic efflux pump	diaminopyrimidine antibiotic;fluoroquinolone antibiotic;phenicol antibiotic	antibiotic efflux
CJQ_2_00438	1059	1	1049	99.06	88.12	AAG05882.1	1062	1	1051	98.96	88.04	AAG05882.1 ARO:3000804 MexF [Pseudomonas aeruginosa PAO1]	1825	0	88.963	1051	114	MexF	MexF is the multidrug inner membrane transporter of the MexEF-OprN complex. mexF corresponds to 2 loci in Pseudomonas aeruginosa PAO1 (gene name: mexF/mexB) and 4 loci in Pseudomonas aeruginosa LESB58 (gene name: mexD/mexB).	resistance-nodulation-cell division (RND) antibiotic efflux pump	diaminopyrimidine antibiotic;fluoroquinolone antibiotic;phenicol antibiotic	antibiotic efflux
CJQ_2_00439	413	1	413	100	70.91	AAG05881.1	414	1	414	100	70.91	AAG05881.1 ARO:3000803 MexE [Pseudomonas aeruginosa PAO1]	546	0	70.913	416	116	MexE	MexE is the membrane fusion protein of the MexEF-OprN multidrug efflux complex.	resistance-nodulation-cell division (RND) antibiotic efflux pump	diaminopyrimidine antibiotic;fluoroquinolone antibiotic;phenicol antibiotic	antibiotic efflux
CJQ_2_00445	1088	578	1050	43.47	16.5	AAC75429.1	1197	691	1159	39.18	14.87	AAC75429.1 ARO:3000833 evgS [Escherichia coli str. K-12 substr. MG1655]	269	0	37.945	477	284	evgS	EvgS is a sensor protein that phosphorylates the regulatory protein EvgA. evgS corresponds to 1 locus in Pseudomonas aeruginosa PAO1 and 1 locus in Pseudomonas aeruginosa LESB58.	major facilitator superfamily (MFS) antibiotic efflux pump;resistance-nodulation-cell division (RND) antibiotic efflux pump	fluoroquinolone antibiotic;macrolide antibiotic;penam;tetracycline antibiotic	antibiotic efflux
CJQ_2_00445	1088	1	585	53.77	13.46	AAC75429.1	1197	1	585	48.87	12.24	AAC75429.1 ARO:3000833 evgS [Escherichia coli str. K-12 substr. MG1655]	207	0	25.042	599	421	evgS	EvgS is a sensor protein that phosphorylates the regulatory protein EvgA. evgS corresponds to 1 locus in Pseudomonas aeruginosa PAO1 and 1 locus in Pseudomonas aeruginosa LESB58.	major facilitator superfamily (MFS) antibiotic efflux pump;resistance-nodulation-cell division (RND) antibiotic efflux pump	fluoroquinolone antibiotic;macrolide antibiotic;penam;tetracycline antibiotic	antibiotic efflux
CJQ_2_00446	204	3	203	98.53	33.49	BAB36671.1	204	2	203	99.02	33.66	BAB36671.1 ARO:3000832 evgA [Escherichia coli O157:H7 str. Sakai]	142	1.19e-43	33.99	203	131	evgA	EvgA, when phosphorylated, is a positive regulator for efflux protein complexes emrKY and mdtEF. While usually phosphorylated in a EvgS dependent manner, it can be phosphorylated in the absence of EvgS when overexpressed.	major facilitator superfamily (MFS) antibiotic efflux pump;resistance-nodulation-cell division (RND) antibiotic efflux pump	fluoroquinolone antibiotic;macrolide antibiotic;penam;tetracycline antibiotic	antibiotic efflux
CJQ_2_00451	159	59	136	49.06	19.5	AAA88560.1	189	87	160	39.15	15.56	AAA88560.1 ARO:3004699 sta [Streptomyces lavendulae]	51.2	1.83e-09	39.744	78	43	sta	Streptothricin acetyltransferase gene (STAT gene) that confers streptothricin resistance on Escherichia coli and Bacillus subtilis.	streptothricin acetyltransferase (SAT)	nucleoside antibiotic	antibiotic inactivation
CJQ_2_00465	430	14	407	91.63	26.44	ACJ41547.2	434	15	413	91.94	26.53	ACJ41547.2 ARO:3004574 Acinetobacter baumannii AbaQ [Acinetobacter baumannii AB0057]	166	1.05e-47	28.856	402	275	Acinetobacter baumannii AbaQ	AbaQ is an MFS transporter mainly involved in the extrusion of quinolone-type drugs in A. baumannii	major facilitator superfamily (MFS) antibiotic efflux pump	fluoroquinolone antibiotic	antibiotic efflux
CJQ_2_00466	320	67	307	75.31	23.15	AAB05626.1	323	73	315	75.23	23.13	AAB05626.1 ARO:3002943 vanHB [Enterococcus faecalis]	102	0	30.739	257	148	vanHB	vanHB is a vanH variant in the vanB gene cluster	glycopeptide resistance gene cluster;vanH	glycopeptide antibiotic	antibiotic target alteration
CJQ_2_00469	394	8	390	97.21	36.67	AAB36568.1	436	13	403	89.68	33.83	AAB36568.1 ARO:3002700 cmlv [Streptomyces venezuelae ATCC 10712]	206	0	37.722	395	230	cmlv	cmlv is a chromosome-encoded chloramphenicol phoshotransferase that is found in Streptomyces venezuelae	chloramphenicol phosphotransferase	phenicol antibiotic	antibiotic inactivation
CJQ_2_00470	293	3	125	41.98	13.88	CAA79966.1	295	7	127	41.02	13.56	CAA79966.1 ARO:3003665 NmcR [Enterobacter cloacae]	60.8	1.53e-11	33.071	127	75	NmcR	NmcR is a homolog of the LysR regulator found in Enterobacter cloacae that contribute to the regulation of NmcA beta-lactamase	NmcA beta-lactamase	carbapenem;cephalosporin;cephamycin;penam	antibiotic inactivation
CJQ_2_00472	410	23	196	42.44	13.58	CCP45647.1	530	63	237	33.02	10.57	CCP45647.1 ARO:3003955 efpA [Mycobacterium tuberculosis H37Rv]	54.3	8.1e-09	32	175	118	efpA	efpA is an MFS transporter found in Mycobacterium tuberculosis.	major facilitator superfamily (MFS) antibiotic efflux pump	isoniazid;rifamycin antibiotic	antibiotic efflux
CJQ_2_00481	156	22	153	84.62	23.36	BAB56495.1	139	1	134	96.4	26.62	BAB56495.1 ARO:3000746 mepR [Staphylococcus aureus subsp. aureus Mu50]	46.2	6.21e-08	27.612	134	95	mepR	MepR is an upstream repressor of MepA in Staphylococcus aureus. It is part of the mepRAB operon.	multidrug and toxic compound extrusion (MATE) transporter	glycylcycline;tetracycline antibiotic	antibiotic efflux
CJQ_2_00490	435	4	423	96.55	69.03	ACJ41547.2	434	4	424	97	69.35	ACJ41547.2 ARO:3004574 Acinetobacter baumannii AbaQ [Acinetobacter baumannii AB0057]	610	0	71.496	421	119	Acinetobacter baumannii AbaQ	AbaQ is an MFS transporter mainly involved in the extrusion of quinolone-type drugs in A. baumannii	major facilitator superfamily (MFS) antibiotic efflux pump	fluoroquinolone antibiotic	antibiotic efflux
CJQ_2_00523	517	23	226	39.46	11.71	AAV85982.1	644	22	223	31.37	9.3	AAV85982.1 ARO:3000535 macB [Neisseria gonorrhoeae]	81.3	0	29.665	209	135	macB	MacB is an ATP-binding cassette (ABC) transporter that exports macrolides with 14- or 15- membered lactones. It forms an antibiotic efflux complex with MacA and TolC. macB corresponds to 1 locus in Pseudomonas aeruginosa PAO1 and 1 locus in Pseudomonas aeruginosa LESB58.	ATP-binding cassette (ABC) antibiotic efflux pump	macrolide antibiotic	antibiotic efflux
CJQ_2_00523	517	268	460	37.33	10.01	AAV85982.1	644	18	202	28.73	7.7	AAV85982.1 ARO:3000535 macB [Neisseria gonorrhoeae]	55.8	4.43e-09	26.804	194	132	macB	MacB is an ATP-binding cassette (ABC) transporter that exports macrolides with 14- or 15- membered lactones. It forms an antibiotic efflux complex with MacA and TolC. macB corresponds to 1 locus in Pseudomonas aeruginosa PAO1 and 1 locus in Pseudomonas aeruginosa LESB58.	ATP-binding cassette (ABC) antibiotic efflux pump	macrolide antibiotic	antibiotic efflux
CJQ_2_00527	306	8	275	87.58	23.94	CAA79966.1	295	7	268	88.81	24.28	CAA79966.1 ARO:3003665 NmcR [Enterobacter cloacae]	85.1	0	27.338	278	176	NmcR	NmcR is a homolog of the LysR regulator found in Enterobacter cloacae that contribute to the regulation of NmcA beta-lactamase	NmcA beta-lactamase	carbapenem;cephalosporin;cephamycin;penam	antibiotic inactivation
CJQ_2_00534	277	166	271	38.27	10.73	BAA15221.2	127	2	108	84.25	23.62	BAA15221.2 ARO:3000263 marA [Escherichia coli str. K-12 substr. W3110]	50.8	4.93e-09	28.037	107	76	marA	In the presence of antibiotic stress, E. coli overexpresses the global activator protein MarA, which besides inducing MDR efflux pump AcrAB, also down- regulates synthesis of the porin OmpF.	General Bacterial Porin with reduced permeability to beta-lactams;resistance-nodulation-cell division (RND) antibiotic efflux pump	carbapenem;cephalosporin;cephamycin;fluoroquinolone antibiotic;glycylcycline;monobactam;penam;penem;phenicol antibiotic;rifamycin antibiotic;tetracycline antibiotic;triclosan	antibiotic efflux;reduced permeability to antibiotic
CJQ_2_00556	752	518	743	30.05	9.46	CAG39047	608	368	597	37.83	11.91	CAG39047 ARO:3003794 Staphylococcus aureus walK with mutation conferring daptomycin resistance [Staphylococcus aureus subsp. aureus MRSA252]	102	0	31.489	235	147	Staphylococcus aureus walK with mutation conferring resistance to daptomycin	walK is the histidine kinase sensor of a two-component regulatory system controlling peptidoglycan metabolism through regulation of the expression of most of the peptidoglycan hydrolase genes. Mutations in the gene have been found that confer daptomycin resistance.	daptomycin resistant walK	peptide antibiotic	antibiotic target alteration
CJQ_2_00557	153	5	127	80.39	26.8	AAD51348.1	229	11	119	47.6	15.87	AAD51348.1 ARO:3003066 smeR [Stenotrophomonas maltophilia]	63.5	7.5e-14	33.333	123	68	smeR	smeR is the responder component of a two component signal transduction system that includes smeS	resistance-nodulation-cell division (RND) antibiotic efflux pump	aminoglycoside antibiotic;cephalosporin;cephamycin;penam	antibiotic efflux
CJQ_2_00558	799	587	790	25.53	7.43	AAC75429.1	1197	865	1073	17.46	5.08	AAC75429.1 ARO:3000833 evgS [Escherichia coli str. K-12 substr. MG1655]	73.9	3.5e-14	29.108	213	138	evgS	EvgS is a sensor protein that phosphorylates the regulatory protein EvgA. evgS corresponds to 1 locus in Pseudomonas aeruginosa PAO1 and 1 locus in Pseudomonas aeruginosa LESB58.	major facilitator superfamily (MFS) antibiotic efflux pump;resistance-nodulation-cell division (RND) antibiotic efflux pump	fluoroquinolone antibiotic;macrolide antibiotic;penam;tetracycline antibiotic	antibiotic efflux
CJQ_2_00565	438	189	427	54.57	20.21	AAG04569.1	448	198	438	53.79	19.92	AAG04569.1 ARO:3003896 Pseudomonas mutant PhoQ conferring resistance to colistin [Pseudomonas aeruginosa PAO1]	120	0	37.037	243	147	Pseudomonas mutant PhoQ conferring resistance to colistin	Mutations in Pseudomonas aeruginosa PhoQ of the two-component PhoPQ regulatory system. Presence of mutation confers resistance to colistin	ATP-binding cassette (ABC) antibiotic efflux pump;pmr phosphoethanolamine transferase	macrolide antibiotic;peptide antibiotic	antibiotic efflux;antibiotic target alteration
CJQ_2_00566	222	1	218	98.2	45.56	AAG04568.1	225	1	221	98.22	45.57	AAG04568.1 ARO:3003895 Pseudomonas mutant PhoP conferring resistance to colistin [Pseudomonas aeruginosa PAO1]	187	0	46.396	222	114	Pseudomonas mutant PhoP conferring resistance to colistin	Mutations in Pseudomonas aeruginosa PhoP of the two-component PhoPQ regulatory system. Presence of mutation confers resistance to colistin.	ATP-binding cassette (ABC) antibiotic efflux pump;pmr phosphoethanolamine transferase	macrolide antibiotic;peptide antibiotic	antibiotic efflux;antibiotic target alteration
CJQ_2_00657	324	11	155	44.75	12.53	CAA79966.1	295	14	160	49.83	13.95	CAA79966.1 ARO:3003665 NmcR [Enterobacter cloacae]	49.7	9.03e-08	28	150	100	NmcR	NmcR is a homolog of the LysR regulator found in Enterobacter cloacae that contribute to the regulation of NmcA beta-lactamase	NmcA beta-lactamase	carbapenem;cephalosporin;cephamycin;penam	antibiotic inactivation
CJQ_2_00666	227	4	223	96.92	37.11	AAV85982.1	644	2	222	34.32	13.14	AAV85982.1 ARO:3000535 macB [Neisseria gonorrhoeae]	154	0	38.288	222	134	macB	MacB is an ATP-binding cassette (ABC) transporter that exports macrolides with 14- or 15- membered lactones. It forms an antibiotic efflux complex with MacA and TolC. macB corresponds to 1 locus in Pseudomonas aeruginosa PAO1 and 1 locus in Pseudomonas aeruginosa LESB58.	ATP-binding cassette (ABC) antibiotic efflux pump	macrolide antibiotic	antibiotic efflux
CJQ_2_00699	602	358	573	35.88	9.62	AET10445.1	578	303	533	39.97	10.71	AET10445.1 ARO:3004033 tetB(46) [Streptococcus australis]	74.7	6e-15	26.809	235	149	tetB(46)	tetB(46) is a subunit of tetAB(46), a heterodimeric ABC transporter, that is required for conferring tetracycline resistance in Streptococcus australis isolated from the oral cavity.	ATP-binding cassette (ABC) antibiotic efflux pump	tetracycline antibiotic	antibiotic efflux
CJQ_2_00710	329	26	314	87.84	35.98	AAB05626.1	323	26	312	88.85	36.39	AAB05626.1 ARO:3002943 vanHB [Enterococcus faecalis]	202	0	40.956	293	163	vanHB	vanHB is a vanH variant in the vanB gene cluster	glycopeptide resistance gene cluster;vanH	glycopeptide antibiotic	antibiotic target alteration
CJQ_2_00711	917	272	597	35.55	11.96	AAC75429.1	1197	698	1022	27.15	9.13	AAC75429.1 ARO:3000833 evgS [Escherichia coli str. K-12 substr. MG1655]	160	0	33.634	333	206	evgS	EvgS is a sensor protein that phosphorylates the regulatory protein EvgA. evgS corresponds to 1 locus in Pseudomonas aeruginosa PAO1 and 1 locus in Pseudomonas aeruginosa LESB58.	major facilitator superfamily (MFS) antibiotic efflux pump;resistance-nodulation-cell division (RND) antibiotic efflux pump	fluoroquinolone antibiotic;macrolide antibiotic;penam;tetracycline antibiotic	antibiotic efflux
CJQ_2_00711	917	665	909	26.72	7.57	AAC75429.1	1197	956	1185	19.21	5.45	AAC75429.1 ARO:3000833 evgS [Escherichia coli str. K-12 substr. MG1655]	69.7	7.55e-13	28.34	247	158	evgS	EvgS is a sensor protein that phosphorylates the regulatory protein EvgA. evgS corresponds to 1 locus in Pseudomonas aeruginosa PAO1 and 1 locus in Pseudomonas aeruginosa LESB58.	major facilitator superfamily (MFS) antibiotic efflux pump;resistance-nodulation-cell division (RND) antibiotic efflux pump	fluoroquinolone antibiotic;macrolide antibiotic;penam;tetracycline antibiotic	antibiotic efflux
CJQ_2_00712	239	1	231	96.65	36.04	AAD51348.1	229	1	225	98.25	36.64	AAD51348.1 ARO:3003066 smeR [Stenotrophomonas maltophilia]	139	1.3e-41	37.288	236	132	smeR	smeR is the responder component of a two component signal transduction system that includes smeS	resistance-nodulation-cell division (RND) antibiotic efflux pump	aminoglycoside antibiotic;cephalosporin;cephamycin;penam	antibiotic efflux
CJQ_2_00713	453	219	445	50.11	17.41	BAB38260.1	457	224	453	50.33	17.49	BAB38260.1 ARO:3000830 cpxA [Escherichia coli O157:H7 str. Sakai]	120	0	34.746	236	139	cpxA	CpxA is a membrane-localized sensor kinase that is activated by envelope stress. It starts a kinase cascade that activates CpxR, which promotes efflux complex expression.	resistance-nodulation-cell division (RND) antibiotic efflux pump	aminocoumarin antibiotic;aminoglycoside antibiotic	antibiotic efflux
CJQ_2_00721	217	80	214	62.21	17.97	AAG06942.1	662	73	187	17.37	5.02	AAG06942.1 ARO:3002985 arnA [Pseudomonas aeruginosa PAO1]	53.5	2.8e-09	28.889	135	76	arnA	arnA modifies lipid A with 4-amino-4-deoxy-L-arabinose (Ara4N) which allows gram-negative bacteria to resist the antimicrobial activity of cationic antimicrobial peptides and antibiotics such as polymyxin. arnA is found in E. coli and P. aeruginosa.	pmr phosphoethanolamine transferase	peptide antibiotic	antibiotic target alteration
CJQ_2_00731	351	239	338	28.49	9.12	AAL23089.1	107	7	106	93.46	29.91	AAL23089.1 ARO:3003383 Salmonella serovars soxS with mutation conferring antibiotic resistance [Salmonella enterica subsp. enterica serovar Typhimurium str. LT2]	57.4	2.14e-11	32	100	68	Salmonella serovars soxS with mutation conferring antibiotic resistance	SoxS is a global regulator that up-regulates the expression of AcrAB efflux genes. It also reduces OmpF expression to decrease cell membrane permeability.	ATP-binding cassette (ABC) antibiotic efflux pump;General Bacterial Porin with reduced permeability to beta-lactams;major facilitator superfamily (MFS) antibiotic efflux pump;resistance-nodulation-cell division (RND) antibiotic efflux pump	carbapenem;cephalosporin;cephamycin;fluoroquinolone antibiotic;glycylcycline;monobactam;penam;penem;phenicol antibiotic;rifamycin antibiotic;tetracycline antibiotic;triclosan	antibiotic efflux;antibiotic target alteration;reduced permeability to antibiotic
CJQ_2_00733	318	211	311	31.76	8.81	AAL23089.1	107	4	101	91.59	25.39	AAL23089.1 ARO:3003383 Salmonella serovars soxS with mutation conferring antibiotic resistance [Salmonella enterica subsp. enterica serovar Typhimurium str. LT2]	43.5	1.54e-06	27.723	101	70	Salmonella serovars soxS with mutation conferring antibiotic resistance	SoxS is a global regulator that up-regulates the expression of AcrAB efflux genes. It also reduces OmpF expression to decrease cell membrane permeability.	ATP-binding cassette (ABC) antibiotic efflux pump;General Bacterial Porin with reduced permeability to beta-lactams;major facilitator superfamily (MFS) antibiotic efflux pump;resistance-nodulation-cell division (RND) antibiotic efflux pump	carbapenem;cephalosporin;cephamycin;fluoroquinolone antibiotic;glycylcycline;monobactam;penam;penem;phenicol antibiotic;rifamycin antibiotic;tetracycline antibiotic;triclosan	antibiotic efflux;antibiotic target alteration;reduced permeability to antibiotic
CJQ_2_00738	253	5	250	97.23	33.18	AAC74177.1	244	3	240	97.54	33.29	AAC74177.1 ARO:3004049 antibiotic resistant fabG [Escherichia coli str. K-12 substr. MG1655]	102	0	34.127	252	146	Escherichia coli fabG mutations conferring resistance to triclosan	fabG is a 3-oxoacyl-acyl carrier protein reductase involved in lipid metabolism and fatty acid biosynthesis.The bacterial biocide Triclosan blocks the final reduction step in fatty acid elongation, inhibiting biosynthesis. Point mutations in fabG can confer resistance to Triclosan.	antibiotic resistant fabG	triclosan	antibiotic target alteration
CJQ_2_00742	442	12	423	93.21	32.81	ACJ41547.2	434	2	409	94.01	33.09	ACJ41547.2 ARO:3004574 Acinetobacter baumannii AbaQ [Acinetobacter baumannii AB0057]	276	0	35.194	412	263	Acinetobacter baumannii AbaQ	AbaQ is an MFS transporter mainly involved in the extrusion of quinolone-type drugs in A. baumannii	major facilitator superfamily (MFS) antibiotic efflux pump	fluoroquinolone antibiotic	antibiotic efflux
CJQ_2_00776	317	16	311	93.38	26.5	Q8FW76	880	44	337	33.41	9.48	Q8FW76 ARO:3003772 Brucella suis mprF [Brucella suis]	73.9	2e-15	28.383	303	201	Brucella suis mprF	MprF is a integral membrane protein that modifies the negatively-charged phosphatidylglycerol on the membrane surface. This confers resistance to cationic peptides that disrupt the cell membrane, including defensins.	defensin resistant mprF	peptide antibiotic	antibiotic target alteration
CJQ_2_00777	401	9	321	78.05	22.47	ABD31357.1	494	131	448	64.37	18.53	ABD31357.1 ARO:3003074 Staphylococcus aureus cls conferring resistance to daptomycin [Staphylococcus aureus subsp. aureus NCTC 8325]	121	3.77e-31	28.793	323	215	Staphylococcus aureus cls conferring resistance to daptomycin	cls or cardiolipin synthetase is an inner membrane protein that is involved in membrane synthesis. Specific mutations in S. aureus can confer resistance to daptomycin.	daptomycin resistant cls	peptide antibiotic	antibiotic target alteration
CJQ_2_00781	1259	890	1246	28.36	7.49	AAC75429.1	1197	712	1066	29.66	7.84	AAC75429.1 ARO:3000833 evgS [Escherichia coli str. K-12 substr. MG1655]	108	0	26.431	367	248	evgS	EvgS is a sensor protein that phosphorylates the regulatory protein EvgA. evgS corresponds to 1 locus in Pseudomonas aeruginosa PAO1 and 1 locus in Pseudomonas aeruginosa LESB58.	major facilitator superfamily (MFS) antibiotic efflux pump;resistance-nodulation-cell division (RND) antibiotic efflux pump	fluoroquinolone antibiotic;macrolide antibiotic;penam;tetracycline antibiotic	antibiotic efflux
CJQ_2_00789	715	1	713	99.72	58.46	CAG39573	693	1	689	99.42	58.29	CAG39573 ARO:3003735 Staphylococcus mutant fusA gene conferring resistance to fusidic acid [Staphylococcus aureus subsp. aureus MRSA252]	818	0	58.626	713	271	Staphylococcus aureus fusA with mutation conferring resistance to fusidic acid	The mutations to this gene are involved in altering the translation elongation factor G (EF-G) in association with the ribosome to prevent fusidic acid from binding EF-G and preventing translation.	antibiotic resistant fusA	fusidic acid	antibiotic target alteration
CJQ_2_00791	123	1	123	100	69.92	AAK44936.1	124	1	123	99.19	69.36	AAK44936.1 ARO:3003395 Mycobacterium tuberculosis rpsL mutations conferring resistance to Streptomycin [Mycobacterium tuberculosis CDC1551]	176	0	69.919	123	37	Mycobacterium tuberculosis rpsL mutations conferring resistance to Streptomycin	Ribosomal protein S12 stabilizes the highly conserved pseudoknot structure formed by 16S rRNA. Amino acid substitutions in RpsL affect the higher-order structure of 16S rRNA and confer streptomycin resistance by disrupting interactions between 16S rRNA and streptomycin.	antibiotic-resistant rpsL	aminoglycoside antibiotic	antibiotic target alteration
CJQ_2_00792	1399	13	1092	77.2	40.87	AJP09758.1	1161	3	1062	91.3	48.34	AJP09758.1 ARO:3004681 Clostridioides difficile rpoC with mutation conferring resistance to vancomycin [Clostridioides difficile 630]	1156	0	52.941	1105	450	Clostridioides difficile rpoC with mutation conferring resistance to vancomycin	Point mutations in the rpoC region of Clostridioides difficile which confer resistance to vancomycin	vancomycin-resistant beta prime subunit of RNA polymerase (rpoC)	glycopeptide antibiotic	antibiotic target alteration
CJQ_2_00792	1399	1133	1363	16.51	8.15	AJP09758.1	1161	920	1148	19.72	9.73	AJP09758.1 ARO:3004681 Clostridioides difficile rpoC with mutation conferring resistance to vancomycin [Clostridioides difficile 630]	213	0	49.351	231	115	Clostridioides difficile rpoC with mutation conferring resistance to vancomycin	Point mutations in the rpoC region of Clostridioides difficile which confer resistance to vancomycin	vancomycin-resistant beta prime subunit of RNA polymerase (rpoC)	glycopeptide antibiotic	antibiotic target alteration
CJQ_2_00793	1357	1	1357	100	71.84	BAB38333.1	1342	1	1342	100	71.84	BAB38333.1 ARO:3003288 Escherichia coli rpoB mutants conferring resistance to rifampicin [Escherichia coli O157:H7 str. Sakai]	2036	0	71.838	1360	362	Escherichia coli rpoB mutants conferring resistance to rifampicin	Point mutations that occurs in Escherichia coli rpoB resulting in resistance to rifampicin	rifamycin-resistant beta-subunit of RNA polymerase (rpoB)	peptide antibiotic;rifamycin antibiotic	antibiotic target alteration;antibiotic target replacement
CJQ_2_00803	2499	1773	2078	12.24	3.56	ADT64081.1	339	26	339	92.63	26.92	ADT64081.1 ARO:3000813 MexS [Pseudomonas aeruginosa PAK]	107	0	29.063	320	207	MexS	MexS is a suppressor of MexT, which is an activator of the multidrug pump MexEF-OprN. Mutations in MexS lead to multidrug resistance.	resistance-nodulation-cell division (RND) antibiotic efflux pump	diaminopyrimidine antibiotic;fluoroquinolone antibiotic;phenicol antibiotic	antibiotic efflux
CJQ_2_00808	208	71	205	64.9	16.83	AJF82049.1	262	65	194	49.62	12.86	AJF82049.1 ARO:3003573 LpxA [Acinetobacter baumannii]	48.1	8.44e-08	25.926	135	95	LpxA	The LpxA gene is widely known to be involved in the biosynthesis of lipid A in Gram-negative bacteria and mutations to this gene may cause resistance to antimicrobial peptides that target the outer membrane	Acinetobacter mutant Lpx gene conferring resistance to colistin	peptide antibiotic	antibiotic target alteration
CJQ_2_00819	421	3	351	82.9	18.65	AAC75089.1	388	1	337	86.86	19.54	AAC75089.1 ARO:3003577 ugd [Escherichia coli str. K-12 substr. MG1655]	57	8.61e-10	22.493	369	234	ugd	PmrE is required for the synthesis and transfer of 4-amino-4-deoxy-L-arabinose (Ara4N) to Lipid A, which allows gram-negative bacteria to resist the antimicrobial activity of cationic antimicrobial peptides and antibiotics such as polymyxin	pmr phosphoethanolamine transferase	peptide antibiotic	antibiotic target alteration
CJQ_2_00821	480	4	74	14.79	6.2	WP_122630831.1	303	55	126	23.76	9.95	WP_122630831.1 ARO:3006864 CRD3-1 [uncultured bacterium]	46.2	2.41e-06	41.892	74	38	CRD3-1	CRD3-1 is a CRD3 beta-lactamase.	CRD3 beta-lactamase	carbapenem	antibiotic inactivation
CJQ_2_00824	558	2	385	68.82	29.87	CCP44394.1	481	19	395	78.38	34.02	CCP44394.1 ARO:3004721 Mycobacterium tuberculosis rpsA mutations conferring resistance to Pyrazinamide [Mycobacterium tuberculosis H37Rv]	286	0	43.401	394	196	Mycobacterium tuberculosis rpsA mutations conferring resistance to pyrazinamide	RpsA, the 30S ribosomal protein S1 of Mycobacterium tuberculosis, is involved in trans-translation and is targeted by pyrazinonic acid, the active form of the antibiotic pyrazinamide, which disrupts the initiation of mRNA translation. Mutations in the amino acid sequence of rpsA can confer resistance to pyrazinamide maintaining rpsA function.	pyrazinamide resistant rpsA	pyrazinamide	antibiotic target alteration
[truncated: 9,120 more rows]

## Sheet: FYR-1-11
qSeq ID	qLength	qStart	qEnd	qCoverage (%)	qSimilarity (%)	sAccession	sLength	sStart	sEnd	sCoverage (%)	sSimilarity (%)	sTitle	bit socre	e-value	identity (%)	alignment length	mismatch	ARO name	Description	AMR Gene Family	Drug Class	Resistance Mechanism
[truncated: 6,725 more rows]

[truncated: 8 more sheets: GLN-1-9, TYF-1-19, WSY-1-22, YQ-1-15, xss-1-4, YB-1-14, zbq-1-19, zjy-1-15]
