# Supplementary material for: Identification and characterization of a novel chromosome-encoded aminoglycoside O-nucleotidyltransferase gene, ant(9)-Id, in Providencia sp. TYF-12 isolated from the marine fish intestine
Source: Front Microbiol. 2024 Dec 12;15:1475172. doi: 10.3389/fmicb.2024.1475172 (PMC11669914; doi:10.3389/fmicb.2024.1475172)
Supplement: Supplementary file 6 [file Table_3.xlsx]

## Sheet: Raw spectroscopic data of ANT(9
Experimental group 1									Experimental group 2									Experimental group 3
Time	Temperature(¡C)	SPE 4.0uM	SPE 8.0uM	SPE 12.0uM	SPE 16.0uM	SPE 20.0uM	SPE 24.0uM		Time	Temperature(¡C)	SPE 4.0uM	SPE 8.0uM	SPE 12.0uM	SPE 16.0uM	SPE 20.0uM	SPE 24.0uM		Time	Temperature(¡C)	SPE 4.0uM	SPE 8.0uM	SPE 12.0uM	SPE 16.0uM	SPE 20.0uM	SPE 24.0uM		Time	Temperature(¡C)	Str 100uM	Tob 50uM
00:00:00	37.1	0.1613	0.1798	0.1629	0.1665	0.1681	0.1687		00:00:00	36.9	0.1695	0.1636	0.1628	0.161	0.1638	0.1576		00:00:00	36.9	0.173	0.1683	0.1684	0.1713	0.1664	0.1673		00:00:00	36.4	0.211	0.2079
00:00:06	36.9	0.1619	0.1766	0.1632	0.1668	0.1676	0.1678		00:00:06	37.1	0.1697	0.1635	0.1636	0.161	0.1641	0.1576		00:00:06	37	0.1733	0.1685	0.1692	0.1717	0.1664	0.1675		00:00:15	36.6	0.2101	0.2072
00:00:12	36.9	0.1616	0.1692	0.1629	0.1668	0.1676	0.1687		00:00:12	37.2	0.17	0.1635	0.1634	0.1612	0.1645	0.1578		00:00:12	37.1	0.1735	0.1688	0.1688	0.172	0.1672	0.1679		00:00:30	36.7	0.2091	0.2075
00:00:18	36.8	0.1616	0.1695	0.1633	0.1667	0.1684	0.1688		00:00:18	37.3	0.17	0.1637	0.1646	0.1618	0.1651	0.1585		00:00:18	37.1	0.174	0.1697	0.1701	0.1733	0.1684	0.1683		00:00:45	36.9	0.2088	0.2068
00:00:24	36.8	0.1617	0.1735	0.1639	0.1671	0.1684	0.1698		00:00:24	37.3	0.1705	0.1643	0.1646	0.1625	0.1647	0.1588		00:00:24	37.1	0.1748	0.17	0.17	0.1746	0.1687	0.1693		00:01:00	36.9	0.2083	0.2067
00:00:30	36.8	0.1625	0.17	0.164	0.167	0.169	0.1702		00:00:30	37.3	0.1705	0.1644	0.1645	0.1623	0.1656	0.1588		00:00:30	37	0.175	0.1709	0.1712	0.1754	0.1699	0.1709		00:01:15	36.9	0.2088	0.2078
00:00:36	36.8	0.1628	0.1707	0.1645	0.1678	0.1694	0.1701		00:00:36	37.3	0.1707	0.1648	0.1656	0.1628	0.1664	0.1593		00:00:36	37	0.1757	0.1719	0.1709	0.1766	0.1708	0.1715		00:01:30	37.1	0.2088	0.2072
00:00:42	36.8	0.1626	0.1712	0.1645	0.168	0.1718	0.1706		00:00:42	37.2	0.1713	0.1652	0.1651	0.1643	0.1669	0.1602		00:00:42	37	0.1768	0.1729	0.1721	0.1767	0.1722	0.1724		00:01:45	37.1	0.2088	0.2082
00:00:48	36.8	0.1632	0.1713	0.1651	0.1688	0.1744	0.1716		00:00:48	37.2	0.172	0.1658	0.1656	0.1638	0.1671	0.1607		00:00:48	36.9	0.1768	0.1737	0.1727	0.1779	0.1726	0.1739		00:02:00	37.1	0.2088	0.2069
00:00:54	36.8	0.1639	0.1714	0.1655	0.1691	0.1701	0.1728		00:00:54	37.1	0.1719	0.1661	0.1662	0.1643	0.1676	0.1604		00:00:54	36.9	0.1773	0.1743	0.1741	0.1788	0.1732	0.1745		00:02:15	37.1	0.2085	0.2072
00:01:00	36.8	0.1637	0.1725	0.166	0.169	0.1705	0.1722		00:01:00	37.1	0.1723	0.1668	0.1667	0.1652	0.1678	0.1612		00:01:00	36.9	0.1785	0.1752	0.1751	0.1814	0.1746	0.1762		00:02:30	37.1	0.2087	0.2074
00:01:06	36.8	0.1642	0.1718	0.1664	0.1697	0.171	0.1726		00:01:06	37	0.1724	0.1676	0.1669	0.165	0.1688	0.1618		00:01:06	36.9	0.1787	0.1764	0.1764	0.1811	0.1762	0.1775		00:02:45	37.1	0.2083	0.2079
00:01:12	36.8	0.1648	0.1728	0.1674	0.1703	0.1719	0.1734		00:01:12	37	0.1729	0.1678	0.1679	0.1666	0.1692	0.1624		00:01:12	36.9	0.1797	0.1782	0.1769	0.1821	0.1769	0.1788		00:03:00	37.1	0.2083	0.2076
00:01:18	36.9	0.1648	0.173	0.1679	0.1716	0.172	0.1738		00:01:18	36.9	0.1736	0.168	0.1677	0.1662	0.1699	0.1626		00:01:18	36.9	0.1798	0.1774	0.1781	0.1831	0.1782	0.1796		00:03:15	37.1	0.2089	0.2079
00:01:24	36.9	0.1655	0.1736	0.1681	0.1713	0.1726	0.174		00:01:24	36.9	0.1738	0.1682	0.1682	0.1666	0.1696	0.1635		00:01:24	36.9	0.1804	0.1786	0.1791	0.1848	0.1794	0.1808		00:03:30	37	0.2087	0.2077
00:01:30	36.9	0.1653	0.1742	0.1687	0.1712	0.1729	0.1743		00:01:30	36.9	0.1741	0.1687	0.1691	0.1677	0.17	0.1638		00:01:30	36.9	0.1814	0.1798	0.1803	0.1866	0.1808	0.182		00:03:45	36.9	0.2087	0.2083
00:01:36	36.9	0.1658	0.1745	0.1696	0.1721	0.1737	0.1752		00:01:36	36.9	0.1757	0.1694	0.1696	0.1683	0.1706	0.1647		00:01:36	36.9	0.1813	0.181	0.181	0.1867	0.1811	0.1835		00:04:00	36.9	0.2092	0.2079
00:01:42	36.8	0.1661	0.1745	0.1704	0.1728	0.1742	0.1756		00:01:42	36.9	0.1752	0.1696	0.17	0.1687	0.1713	0.1646		00:01:42	36.9	0.1817	0.1819	0.1825	0.1877	0.1825	0.1845		00:04:15	36.9	0.2098	0.2074
00:01:48	36.8	0.1663	0.176	0.1715	0.1734	0.1749	0.1761		00:01:48	36.9	0.1753	0.1707	0.1707	0.1689	0.1724	0.1659		00:01:48	37	0.1821	0.1825	0.1834	0.1892	0.1837	0.1863		00:04:30	36.9	0.2099	0.2074
00:01:54	36.8	0.1674	0.1754	0.1722	0.1749	0.1755	0.1763		00:01:54	36.9	0.1762	0.171	0.171	0.1694	0.1728	0.1665		00:01:54	36.9	0.1829	0.1829	0.185	0.1905	0.1845	0.187		00:04:45	36.9	0.2097	0.2073
00:02:00	36.9	0.1672	0.1756	0.1733	0.1742	0.1758	0.177		00:02:00	36.9	0.176	0.1716	0.1714	0.17	0.1735	0.1673		00:02:00	37	0.1823	0.1838	0.1854	0.1911	0.1859	0.1889		00:05:00	36.9	0.2094	0.2071
00:02:06	36.8	0.1673	0.176	0.1739	0.1749	0.176	0.1778		00:02:06	36.9	0.176	0.173	0.172	0.1716	0.1741	0.1674		00:02:06	37	0.1828	0.1849	0.1867	0.1922	0.1874	0.19		00:05:15	36.9	0.2094	0.2072
00:02:12	36.9	0.1676	0.1769	0.1745	0.1751	0.1764	0.1786		00:02:12	37	0.1765	0.1725	0.1726	0.1717	0.1741	0.168		00:02:12	37	0.1833	0.1853	0.187	0.1933	0.1885	0.1913		00:05:30	37	0.2085	0.2077
00:02:18	36.9	0.1679	0.1774	0.1751	0.1757	0.1772	0.179		00:02:18	37	0.1775	0.1732	0.1733	0.1727	0.1746	0.1698		00:02:18	37	0.1829	0.1869	0.1883	0.194	0.1904	0.1931		00:05:45	37	0.2085	0.208
00:02:24	36.9	0.1682	0.1806	0.1756	0.1761	0.1776	0.1796		00:02:24	37	0.1779	0.1738	0.1739	0.1732	0.1757	0.1702		00:02:24	36.9	0.1831	0.1874	0.1892	0.1957	0.1913	0.1936		00:06:00	36.9	0.2086	0.2082
00:02:30	36.9	0.1699	0.178	0.1751	0.1773	0.1777	0.18		00:02:30	36.9	0.1777	0.1738	0.1741	0.1736	0.1764	0.1699		00:02:30	36.9	0.1837	0.1873	0.1902	0.1969	0.1916	0.1952		00:06:15	37	0.2083	0.207
00:02:36	36.9	0.172	0.1782	0.1754	0.1776	0.1783	0.1807		00:02:36	36.9	0.1782	0.1743	0.1749	0.1744	0.1763	0.1701		00:02:36	36.9	0.1842	0.188	0.1912	0.1974	0.1928	0.1963		00:06:30	37	0.2082	0.2066
00:02:42	36.9	0.1721	0.1815	0.1754	0.1779	0.1793	0.1812		00:02:42	37	0.1783	0.1748	0.1756	0.1739	0.1772	0.1705		00:02:42	36.9	0.184	0.1895	0.1921	0.1985	0.1949	0.198		00:06:45	37	0.2086	0.2063
00:02:48	36.9	0.1705	0.1793	0.1749	0.1782	0.1797	0.1818		00:02:48	36.9	0.179	0.1755	0.1762	0.1743	0.1775	0.1723		00:02:48	36.9	0.1841	0.1889	0.1932	0.1996	0.1956	0.1998		00:07:00	37	0.2085	0.2061
00:02:54	36.9	0.1694	0.1795	0.1751	0.1786	0.1797	0.1825		00:02:54	36.9	0.1786	0.1757	0.1765	0.1752	0.1786	0.1718		00:02:54	37	0.1839	0.1896	0.194	0.2005	0.1969	0.201		00:07:15	37	0.2084	0.2065
00:03:00	37	0.1693	0.18	0.176	0.1796	0.1808	0.183		00:03:00	36.9	0.179	0.1765	0.1769	0.1758	0.179	0.173		00:03:00	36.9	0.1838	0.1898	0.1948	0.2016	0.1979	0.2023		00:07:30	37	0.2083	0.207
00:03:06	36.9	0.1698	0.1802	0.1761	0.1798	0.1811	0.1832		00:03:06	36.9	0.1792	0.1776	0.1774	0.1761	0.1794	0.1736		00:03:06	36.9	0.1835	0.1904	0.1958	0.2031	0.1988	0.2032		00:07:45	37.1	0.2086	0.2072
00:03:12	36.9	0.1701	0.1808	0.177	0.1802	0.182	0.1838		00:03:12	36.9	0.1801	0.1774	0.178	0.177	0.1799	0.1737		00:03:12	36.9	0.1842	0.1903	0.1965	0.2041	0.2003	0.2047		00:08:00	37	0.2081	0.2075
00:03:18	36.9	0.1701	0.181	0.1769	0.1804	0.1821	0.1841		00:03:18	36.9	0.1799	0.1779	0.1786	0.1778	0.1807	0.1746		00:03:18	36.9	0.1843	0.191	0.1969	0.2049	0.2015	0.2057		00:08:15	37.1	0.2083	0.2073
00:03:24	36.9	0.1706	0.1817	0.1773	0.1816	0.1826	0.1848		00:03:24	36.9	0.1802	0.1782	0.1787	0.1779	0.181	0.1747		00:03:24	36.9	0.1839	0.1922	0.1974	0.2053	0.2036	0.208		00:08:30	37.1	0.2084	0.2075
00:03:30	36.9	0.1707	0.1821	0.1776	0.1819	0.1833	0.186		00:03:30	36.9	0.1798	0.1792	0.1795	0.1787	0.1819	0.1757		00:03:30	37	0.1842	0.1917	0.1977	0.2063	0.2038	0.2093		00:08:45	37	0.2085	0.2076
00:03:36	37	0.1706	0.1827	0.1786	0.1851	0.184	0.1866		00:03:36	37	0.1805	0.179	0.1801	0.1791	0.1825	0.1762		00:03:36	37	0.1841	0.1919	0.199	0.2078	0.2046	0.21		00:09:00	37	0.208	0.2074
00:03:42	37	0.1712	0.1828	0.1789	0.1849	0.1843	0.1867		00:03:42	36.9	0.1799	0.1792	0.1805	0.1798	0.1828	0.1771		00:03:42	37	0.1842	0.1911	0.1992	0.2088	0.2057	0.211		00:09:15	37	0.2084	0.2067
00:03:48	37	0.1715	0.1831	0.1792	0.1833	0.1848	0.1872		00:03:48	36.9	0.1798	0.1797	0.1815	0.1802	0.1835	0.178		00:03:48	36.9	0.1841	0.1913	0.1997	0.209	0.2063	0.2123		00:09:30	37	0.2076	0.207
00:03:54	37	0.1718	0.1836	0.1797	0.1838	0.1853	0.1876		00:03:54	37	0.1798	0.18	0.1818	0.1814	0.184	0.1781		00:03:54	36.9	0.1841	0.1921	0.2003	0.211	0.208	0.2155		00:09:45	37	0.2081	0.2072
00:04:00	37.1	0.1712	0.1844	0.1805	0.1844	0.1861	0.1887		00:04:00	37	0.1801	0.1805	0.1821	0.1809	0.1847	0.1789		00:04:00	36.9	0.1848	0.1916	0.1999	0.2106	0.2086	0.2154		00:10:00	37	0.2072	0.2069
00:04:06	37.1	0.1717	0.1843	0.181	0.1848	0.1868	0.1896		00:04:06	36.9	0.1802	0.1809	0.1828	0.1818	0.1855	0.1794		00:04:06	36.9	0.184	0.1913	0.2009	0.2116	0.2099	0.2162
00:04:12	37.1	0.1713	0.185	0.1811	0.1855	0.1871	0.1901		00:04:12	36.9	0.1801	0.1809	0.183	0.1825	0.1861	0.1803		00:04:12	36.9	0.1846	0.1919	0.2006	0.213	0.211	0.2176
00:04:18	37	0.172	0.1857	0.1819	0.186	0.1883	0.1911		00:04:18	36.9	0.1799	0.182	0.1833	0.1823	0.1863	0.1812		00:04:18	36.9	0.1845	0.1918	0.2011	0.2136	0.2117	0.2188
00:04:24	37.1	0.1721	0.1858	0.1818	0.1867	0.1893	0.1919		00:04:24	36.9	0.1804	0.1819	0.1843	0.1833	0.1877	0.1818		00:04:24	36.9	0.1844	0.1921	0.2011	0.2138	0.2124	0.2199
00:04:30	37.1	0.1722	0.186	0.1828	0.1872	0.1894	0.1921		00:04:30	36.9	0.1801	0.1817	0.1841	0.1837	0.1869	0.182		00:04:30	36.9	0.1841	0.1921	0.2016	0.2139	0.2133	0.2209
00:04:36	37	0.172	0.1863	0.1829	0.1877	0.19	0.1928		00:04:36	36.9	0.18	0.1826	0.1851	0.1849	0.1885	0.1849		00:04:36	36.9	0.1842	0.1926	0.2016	0.215	0.2144	0.2225
00:04:42	37	0.1718	0.1863	0.1836	0.1885	0.1904	0.1935		00:04:42	37	0.1803	0.183	0.1855	0.1851	0.1893	0.1839		00:04:42	36.9	0.1838	0.1924	0.2018	0.2155	0.2151	0.2234
00:04:48	37	0.1724	0.187	0.1842	0.1891	0.1921	0.1936		00:04:48	36.9	0.1803	0.183	0.1865	0.1864	0.1897	0.184		00:04:48	37	0.1843	0.1923	0.202	0.2161	0.2158	0.2246
00:04:54	37	0.1719	0.1872	0.1845	0.1896	0.1924	0.1943		00:04:54	37	0.1805	0.1837	0.1869	0.1873	0.1904	0.1846		00:04:54	37	0.1843	0.1922	0.2021	0.2164	0.217	0.2259
00:05:00	37.1	0.1722	0.1878	0.1849	0.19	0.1934	0.1947		00:05:00	37	0.1803	0.1843	0.1874	0.187	0.1909	0.1858		00:05:00	37	0.1842	0.192	0.2017	0.2167	0.2184	0.2274
			SPE: Spectinomycin
			Str: Streptomycin
			Tob: Tobramycin
