# Supplementary material for: Identification and characterization of a novel chromosome-encoded aminoglycoside O-nucleotidyltransferase gene, ant(9)-Id, in Providencia sp. TYF-12 isolated from the marine fish intestine
Source: Front Microbiol. 2024 Dec 12;15:1475172. doi: 10.3389/fmicb.2024.1475172 (PMC11669914; doi:10.3389/fmicb.2024.1475172)
Supplement: Supplementary file 10 [file Table_7.xlsx]

## Sheet: The sources of the 89 WP_129467
Bacrerial Genebank Accession Number	Organism	Protein Accession Number	Name	Source
GCF_021868975.1	Providencia rettgeri	WP_129467149.1	aminoglycoside adenylyltransferase family protein	human
GCF_022253495.1	Providencia rettgeri	WP_129467149.1	aminoglycoside adenylyltransferase family protein	human
GCF_022349885.1	Providencia rettgeri	WP_129467149.1	aminoglycoside adenylyltransferase family protein	human
GCF_963921545.1	Providencia sp.	WP_129467149.1	aminoglycoside adenylyltransferase family protein	unknown
GCF_013702025.1	Providencia rettgeri	WP_129467149.1	aminoglycoside adenylyltransferase family protein	human
GCF_020985345.1	Providencia rettgeri	WP_129467149.1	aminoglycoside adenylyltransferase family protein	environment
GCF_029011985.1	Providencia rettgeri	WP_129467149.1	aminoglycoside adenylyltransferase family protein	environment
GCF_025916175.1	Providencia rettgeri	WP_129467149.1	aminoglycoside adenylyltransferase family protein	human
GCF_032709665.1	Providencia sp. PROV024	WP_129467149.1	aminoglycoside adenylyltransferase family protein	pig
GCF_011683855.1	Providencia rettgeri	WP_129467149.1	aminoglycoside adenylyltransferase family protein	American crow
GCF_011683695.1	Providencia rettgeri	WP_129467149.1	aminoglycoside adenylyltransferase family protein	American crow
GCF_011683715.1	Providencia rettgeri	WP_129467149.1	aminoglycoside adenylyltransferase family protein	American crow
GCF_011683765.1	Providencia rettgeri	WP_129467149.1	aminoglycoside adenylyltransferase family protein	American crow
GCF_011683815.1	Providencia rettgeri	WP_129467149.1	aminoglycoside adenylyltransferase family protein	American crow
GCF_011683755.1	Providencia rettgeri	WP_129467149.1	aminoglycoside adenylyltransferase family protein	American crow
GCF_011683795.1	Providencia rettgeri	WP_129467149.1	aminoglycoside adenylyltransferase family protein	American crow
GCF_011683805.1	Providencia rettgeri	WP_129467149.1	aminoglycoside adenylyltransferase family protein	American crow
GCF_011683905.1	Providencia rettgeri	WP_129467149.1	aminoglycoside adenylyltransferase family protein	American crow
GCF_011682035.1	Providencia rettgeri	WP_129467149.1	aminoglycoside adenylyltransferase family protein	American crow
GCF_011765765.1	Providencia sp. 504mA	WP_129467149.1	aminoglycoside adenylyltransferase family protein	American crow
GCF_017163415.1	Providencia rettgeri	WP_129467149.1	aminoglycoside adenylyltransferase family protein	unknown
GCF_018066445.1	Providencia rettgeri	WP_129467149.1	aminoglycoside adenylyltransferase family protein	human
GCF_018067475.1	Providencia rettgeri	WP_129467149.1	aminoglycoside adenylyltransferase family protein	human
GCF_018067565.1	Providencia rettgeri	WP_129467149.1	aminoglycoside adenylyltransferase family protein	human
GCF_018067585.1	Providencia rettgeri	WP_129467149.1	aminoglycoside adenylyltransferase family protein	human
GCF_018067605.1	Providencia rettgeri	WP_129467149.1	aminoglycoside adenylyltransferase family protein	human
GCF_018067765.1	Providencia rettgeri	WP_129467149.1	aminoglycoside adenylyltransferase family protein	human
GCF_018067875.1	Providencia rettgeri	WP_129467149.1	aminoglycoside adenylyltransferase family protein	human
GCF_018068045.1	Providencia rettgeri	WP_129467149.1	aminoglycoside adenylyltransferase family protein	human
GCF_018068205.1	Providencia rettgeri	WP_129467149.1	aminoglycoside adenylyltransferase family protein	human
GCF_018069225.1	Providencia rettgeri	WP_129467149.1	aminoglycoside adenylyltransferase family protein	human
GCF_018069385.1	Providencia rettgeri	WP_129467149.1	aminoglycoside adenylyltransferase family protein	human
GCF_020523785.1	Providencia rettgeri	WP_129467149.1	aminoglycoside adenylyltransferase family protein	human
GCF_028477865.1	Providencia sp. PROV265	WP_129467149.1	aminoglycoside adenylyltransferase family protein	human
GCF_028478005.1	Providencia sp. PROV258	WP_129467149.1	aminoglycoside adenylyltransferase family protein	human
GCF_028479225.1	Providencia sp. PROV225	WP_129467149.1	aminoglycoside adenylyltransferase family protein	human
GCF_028480775.1	Providencia sp. PROV167	WP_129467149.1	aminoglycoside adenylyltransferase family protein	human
GCF_028480815.1	Providencia sp. PROV164	WP_129467149.1	aminoglycoside adenylyltransferase family protein	human
GCF_028481265.1	Providencia sp. PROV147	WP_129467149.1	aminoglycoside adenylyltransferase family protein	human
GCF_028481965.1	Providencia sp. PROV137	WP_129467149.1	aminoglycoside adenylyltransferase family protein	human
GCF_028481945.1	Providencia sp. PROV136	WP_129467149.1	aminoglycoside adenylyltransferase family protein	human
GCF_028482045.1	Providencia sp. PROV135	WP_129467149.1	aminoglycoside adenylyltransferase family protein	human
GCF_028482605.1	Providencia sp. PROV110	WP_129467149.1	aminoglycoside adenylyltransferase family protein	human
GCF_028482865.1	Providencia sp. PROV104	WP_129467149.1	aminoglycoside adenylyltransferase family protein	human
GCF_028484755.1	Providencia sp. PROV039	WP_129467149.1	aminoglycoside adenylyltransferase family protein	human
GCF_028484995.1	Providencia sp. PROV024	WP_129467149.1	aminoglycoside adenylyltransferase family protein	human
GCF_028485315.1	Providencia sp. PROV011	WP_129467149.1	aminoglycoside adenylyltransferase family protein	human
GCF_028485355.1	Providencia sp. PROV010	WP_129467149.1	aminoglycoside adenylyltransferase family protein	human
GCF_029916435.1	Providencia rettgeri	WP_129467149.1	aminoglycoside adenylyltransferase family protein	unknown
GCF_029624095.1	Providencia huashanensis	WP_129467149.1	aminoglycoside adenylyltransferase family protein	human
GCF_029846555.1	Providencia rettgeri	WP_129467149.1	aminoglycoside adenylyltransferase family protein	unknown
GCF_030580945.1	Providencia huashanensis	WP_129467149.1	aminoglycoside adenylyltransferase family protein	human
GCF_030580895.1	Providencia huashanensis	WP_129467149.1	aminoglycoside adenylyltransferase family protein	human
GCF_034661215.1	Providencia xianensis	WP_129467149.1	aminoglycoside adenylyltransferase family protein	human
GCF_034661195.1	Providencia xianensis	WP_129467149.1	aminoglycoside adenylyltransferase family protein	human
GCF_040136635.1	Providencia alcalifaciens	WP_129467149.1	aminoglycoside adenylyltransferase family protein	fly
GCF_040141425.1	Providencia alcalifaciens	WP_129467149.1	aminoglycoside adenylyltransferase family protein	fly
GCF_040142225.1	Providencia alcalifaciens	WP_129467149.1	aminoglycoside adenylyltransferase family protein	fly
GCF_040142255.1	Providencia alcalifaciens	WP_129467149.1	aminoglycoside adenylyltransferase family protein	fly
GCF_040142245.1	Providencia alcalifaciens	WP_129467149.1	aminoglycoside adenylyltransferase family protein	fly
GCF_041025525.1	Providencia huashanensis	WP_129467149.1	aminoglycoside adenylyltransferase family protein	fly
GCF_041025545.1	Providencia huashanensis	WP_129467149.1	aminoglycoside adenylyltransferase family protein	fly
GCF_041025595.1	Providencia hangzhouensis	WP_129467149.1	aminoglycoside adenylyltransferase family protein	fly
GCF_041025195.1	Providencia huashanensis	WP_129467149.1	aminoglycoside adenylyltransferase family protein	fly
GCF_041023285.1	Providencia huashanensis	WP_129467149.1	aminoglycoside adenylyltransferase family protein	fly
GCF_041023215.1	Providencia huashanensis	WP_129467149.1	aminoglycoside adenylyltransferase family protein	fly
GCF_041022275.1	Providencia huashanensis	WP_129467149.1	aminoglycoside adenylyltransferase family protein	fly
GCF_041022565.1	Providencia huashanensis	WP_129467149.1	aminoglycoside adenylyltransferase family protein	fly
GCF_004120665.1	Providencia rettgeri	WP_129467149.1	aminoglycoside adenylyltransferase family protein	environment
GCF_019693715.1	Providencia rettgeri	WP_129467149.1	aminoglycoside adenylyltransferase family protein	unknown
GCF_019693725.1	Providencia rettgeri	WP_129467149.1	aminoglycoside adenylyltransferase family protein	unknown
GCF_019693815.1	Providencia rettgeri	WP_129467149.1	aminoglycoside adenylyltransferase family protein	unknown
GCF_019693835.1	Providencia rettgeri	WP_129467149.1	aminoglycoside adenylyltransferase family protein	human
GCF_019693855.1	Providencia rettgeri	WP_129467149.1	aminoglycoside adenylyltransferase family protein	human
GCF_004335985.1	Providencia rettgeri	WP_129467149.1	aminoglycoside adenylyltransferase family protein	human
GCF_019693935.1	Providencia rettgeri	WP_129467149.1	aminoglycoside adenylyltransferase family protein	human
GCF_019693955.1	Providencia rettgeri	WP_129467149.1	aminoglycoside adenylyltransferase family protein	human
GCF_019693965.1	Providencia rettgeri	WP_129467149.1	aminoglycoside adenylyltransferase family protein	human
GCF_019693985.1	Providencia rettgeri	WP_129467149.1	aminoglycoside adenylyltransferase family protein	human
GCF_019694035.1	Providencia rettgeri	WP_129467149.1	aminoglycoside adenylyltransferase family protein	human
GCF_019694015.1	Providencia rettgeri	WP_129467149.1	aminoglycoside adenylyltransferase family protein	human
GCF_019694085.1	Providencia rettgeri	WP_129467149.1	aminoglycoside adenylyltransferase family protein	human
GCF_019694115.1	Providencia rettgeri	WP_129467149.1	aminoglycoside adenylyltransferase family protein	human
GCF_019694065.1	Providencia rettgeri	WP_129467149.1	aminoglycoside adenylyltransferase family protein	human
GCF_019694055.1	Providencia rettgeri	WP_129467149.1	aminoglycoside adenylyltransferase family protein	human
GCF_019836965.1	Providencia rettgeri	WP_129467149.1	aminoglycoside adenylyltransferase family protein	human
GCF_019837025.1	Providencia rettgeri	WP_129467149.1	aminoglycoside adenylyltransferase family protein	human
GCF_019837045.1	Providencia rettgeri	WP_129467149.1	aminoglycoside adenylyltransferase family protein	human
